# Supplementary material
Source: HighWire-hosted journal article supplement (doi:10.1101/rna.069047.118)
Supplement: Supplemental_Tables.xlsx [file Supplemental_Tables.xlsx]

## Sheet: BMDMs -Table S1
Row.names	mir_name	mature_iv	mature_length	length	isomir_start	isomir_end	isomir_strand	canon_start	canon_end	Wt_raw	Wt+LPS_raw	miR-155_KO_raw	miR-155_KO+LPS_raw	Wt_norm	Wt+LPS_norm	miR-155_KO_norm	miR-155_KO+LPS_norm
chr13:48538187-48538209_-	mmu-let-7a-1-3p	chr13:48538187-48538209_-	22	22	48538209	48538187	-	Yes	Yes	144	133	199	145	23.4839	17.9156	21.999	16.7441
chr13:48538188-48538209_-	mmu-let-7a-1-3p	chr13:48538187-48538209_-	22	21	48538209	48538188	-	Yes	No	11	17	16	25	1.79391	2.28997	1.76877	2.88691
chr13:48538189-48538209_-	mmu-let-7a-1-3p	chr13:48538187-48538209_-	22	20	48538209	48538189	-	Yes	No	0	13	4	2	0	1.75115	0.442191	0.230953
chr9:41536728-41536752_+	mmu-let-7a-5p	chr9:41536731-41536753_+	22	24	41536728	41536752	+	No	No	0	0	0	9	0	0	0	1.03929
chr9:41536729-41536753_+	mmu-let-7a-5p	chr9:41536731-41536753_+	22	24	41536729	41536753	+	No	Yes	2	0	1	11	0.326165	0	0.110548	1.27024
chr9:41536730-41536752_+	mmu-let-7a-5p	chr9:41536731-41536753_+	22	22	41536730	41536752	+	No	No	2	5	9	11	0.326165	0.673521	0.994931	1.27024
chr9:41536730-41536753_+	mmu-let-7a-5p	chr9:41536731-41536753_+	22	23	41536730	41536753	+	No	Yes	27	30	27	27	4.40323	4.04112	2.98479	3.11786
chr9:41536730-41536754_+	mmu-let-7a-5p	chr9:41536731-41536753_+	22	24	41536730	41536754	+	No	No	3	6	12	3	0.489248	0.808225	1.32657	0.346429
chr9:41536731-41536749_+	mmu-let-7a-5p	chr9:41536731-41536753_+	22	18	41536731	41536749	+	Yes	No	30	46	23	93	4.89248	6.19639	2.5426	10.7393
chr9:41536731-41536750_+	mmu-let-7a-5p	chr9:41536731-41536753_+	22	19	41536731	41536750	+	Yes	No	70	191	110	232	11.4158	25.7285	12.1603	26.7905
chr9:41536731-41536751_+	mmu-let-7a-5p	chr9:41536731-41536753_+	22	20	41536731	41536751	+	Yes	No	2033	2916	1091	3319	331.547	392.797	120.608	383.266
chr9:41536731-41536752_+	mmu-let-7a-5p	chr9:41536731-41536753_+	22	21	41536731	41536752	+	Yes	No	15465	16976	15372	18665	2522.07	2286.74	1699.34	2155.37
chr9:41536731-41536753_+	mmu-let-7a-5p	chr9:41536731-41536753_+	22	22	41536731	41536753	+	Yes	Yes	99317	80509	96828	85798	16196.9	10844.9	10704.1	9907.65
chr9:41536731-41536754_+	mmu-let-7a-5p	chr9:41536731-41536753_+	22	23	41536731	41536754	+	Yes	No	10946	9901	13286	12103	1785.1	1333.71	1468.74	1397.61
chr9:41536731-41536755_+	mmu-let-7a-5p	chr9:41536731-41536753_+	22	24	41536731	41536755	+	Yes	No	1863	1311	2637	1846	303.823	176.597	291.515	213.169
chr9:41536731-41536756_+	mmu-let-7a-5p	chr9:41536731-41536753_+	22	25	41536731	41536756	+	Yes	No	277	205	547	333	45.1739	27.6143	60.4697	38.4537
chr9:41536731-41536757_+	mmu-let-7a-5p	chr9:41536731-41536753_+	22	26	41536731	41536757	+	Yes	No	59	55	97	91	9.62187	7.40873	10.7231	10.5084
chr9:41536731-41536758_+	mmu-let-7a-5p	chr9:41536731-41536753_+	22	27	41536731	41536758	+	Yes	No	8	19	9	9	1.30466	2.55938	0.994931	1.03929
chr9:41536731-41536759_+	mmu-let-7a-5p	chr9:41536731-41536753_+	22	28	41536731	41536759	+	Yes	No	1	2	13	9	0.163083	0.269408	1.43712	1.03929
chr9:41536732-41536751_+	mmu-let-7a-5p	chr9:41536731-41536753_+	22	19	41536732	41536751	+	No	No	21	29	11	42	3.42473	3.90642	1.21603	4.85001
chr9:41536732-41536752_+	mmu-let-7a-5p	chr9:41536731-41536753_+	22	20	41536732	41536752	+	No	No	206	247	209	315	33.595	33.2719	23.1045	36.3751
chr9:41536732-41536753_+	mmu-let-7a-5p	chr9:41536731-41536753_+	22	21	41536732	41536753	+	No	Yes	1564	1171	1342	1505	255.061	157.739	148.355	173.792
chr9:41536732-41536754_+	mmu-let-7a-5p	chr9:41536731-41536753_+	22	22	41536732	41536754	+	No	No	148	176	177	193	24.1362	23.7079	19.567	22.287
chr9:41536732-41536755_+	mmu-let-7a-5p	chr9:41536731-41536753_+	22	23	41536732	41536755	+	No	No	33	22	43	29	5.38173	2.96349	4.75356	3.34882
chr9:41536732-41536756_+	mmu-let-7a-5p	chr9:41536731-41536753_+	22	24	41536732	41536756	+	No	No	10	3	1	6	1.63083	0.404112	0.110548	0.692859
chr9:41536733-41536753_+	mmu-let-7a-5p	chr9:41536731-41536753_+	22	20	41536733	41536753	+	No	Yes	0	1	5	12	0	0.134704	0.552739	1.38572
chr9:41536734-41536753_+	mmu-let-7a-5p	chr9:41536731-41536753_+	22	19	41536734	41536753	+	No	Yes	6	6	9	14	0.978496	0.808225	0.994931	1.61667
chr15:85707378-85707398_+	mmu-let-7b-3p	chr15:85707378-85707400_+	22	20	85707378	85707398	+	Yes	No	0	0	9	7	0	0	0.994931	0.808335
chr15:85707378-85707399_+	mmu-let-7b-3p	chr15:85707378-85707400_+	22	21	85707378	85707399	+	Yes	No	10	10	0	7	1.63083	1.34704	0	0.808335
chr15:85707378-85707400_+	mmu-let-7b-3p	chr15:85707378-85707400_+	22	22	85707378	85707400	+	Yes	Yes	99	99	182	114	16.1452	13.3357	20.1197	13.1643
chr15:85707323-85707346_+	mmu-let-7b-5p	chr15:85707324-85707346_+	22	23	85707323	85707346	+	No	Yes	15	12	8	0	2.44624	1.61645	0.884383	0
chr15:85707324-85707342_+	mmu-let-7b-5p	chr15:85707324-85707346_+	22	18	85707324	85707342	+	Yes	No	10	28	5	26	1.63083	3.77171	0.552739	3.00239
chr15:85707324-85707343_+	mmu-let-7b-5p	chr15:85707324-85707346_+	22	19	85707324	85707343	+	Yes	No	50	72	37	66	8.15413	9.6987	4.09027	7.62144
chr15:85707324-85707344_+	mmu-let-7b-5p	chr15:85707324-85707346_+	22	20	85707324	85707344	+	Yes	No	378	475	228	453	61.6452	63.9844	25.2049	52.3108
chr15:85707324-85707345_+	mmu-let-7b-5p	chr15:85707324-85707346_+	22	21	85707324	85707345	+	Yes	No	1676	1665	1071	1615	273.326	224.282	118.397	186.494
chr15:85707324-85707346_+	mmu-let-7b-5p	chr15:85707324-85707346_+	22	22	85707324	85707346	+	Yes	Yes	9849	8452	7615	8935	1606.2	1138.52	841.822	1031.78
chr15:85707324-85707347_+	mmu-let-7b-5p	chr15:85707324-85707346_+	22	23	85707324	85707347	+	Yes	No	5618	5830	4999	5526	916.198	785.325	552.629	638.123
chr15:85707324-85707348_+	mmu-let-7b-5p	chr15:85707324-85707346_+	22	24	85707324	85707348	+	Yes	No	982	840	906	872	160.147	113.151	100.156	100.695
chr15:85707324-85707349_+	mmu-let-7b-5p	chr15:85707324-85707346_+	22	25	85707324	85707349	+	Yes	No	259	110	239	173	42.2384	14.8175	26.4209	19.9774
chr15:85707324-85707350_+	mmu-let-7b-5p	chr15:85707324-85707346_+	22	26	85707324	85707350	+	Yes	No	19	8	19	15	3.09857	1.07763	2.10041	1.73215
chr15:85707325-85707345_+	mmu-let-7b-5p	chr15:85707324-85707346_+	22	20	85707325	85707345	+	No	No	7	15	9	8	1.14158	2.02056	0.994931	0.923811
chr15:85707325-85707346_+	mmu-let-7b-5p	chr15:85707324-85707346_+	22	21	85707325	85707346	+	No	Yes	57	80	74	66	9.29571	10.7763	8.18054	7.62144
chr15:85707325-85707347_+	mmu-let-7b-5p	chr15:85707324-85707346_+	22	22	85707325	85707347	+	No	No	57	77	54	55	9.29571	10.3722	5.96958	6.3512
chr15:85707325-85707348_+	mmu-let-7b-5p	chr15:85707324-85707346_+	22	23	85707325	85707348	+	No	No	5	11	13	10	0.815413	1.48175	1.43712	1.15476
chr15:85706663-85706684_+	mmu-let-7c-2-3p	chr15:85706663-85706685_+	22	21	85706663	85706684	+	Yes	No	19	13	22	34	3.09857	1.75115	2.43205	3.9262
chr15:85706663-85706685_+	mmu-let-7c-2-3p	chr15:85706663-85706685_+	22	22	85706663	85706685	+	Yes	Yes	170	145	197	149	27.724	19.5321	21.7779	17.206
chr15:85706614-85706637_+	mmu-let-7c-5p	chr15:85706615-85706637_+	22	23	85706614	85706637	+	No	Yes	5	12	11	18	0.815413	1.61645	1.21603	2.07858
chr15:85706615-85706633_+	mmu-let-7c-5p	chr15:85706615-85706637_+	22	18	85706615	85706633	+	Yes	No	28	50	26	73	4.56631	6.73521	2.87424	8.42978
chr15:85706615-85706634_+	mmu-let-7c-5p	chr15:85706615-85706637_+	22	19	85706615	85706634	+	Yes	No	51	61	48	68	8.31721	8.21695	5.3063	7.8524
chr15:85706615-85706635_+	mmu-let-7c-5p	chr15:85706615-85706637_+	22	20	85706615	85706635	+	Yes	No	367	406	172	460	59.8513	54.6899	19.0142	53.1192
chr15:85706615-85706636_+	mmu-let-7c-5p	chr15:85706615-85706637_+	22	21	85706615	85706636	+	Yes	No	2094	2652	1723	2311	341.495	357.235	190.474	266.866
chr15:85706615-85706637_+	mmu-let-7c-5p	chr15:85706615-85706637_+	22	22	85706615	85706637	+	Yes	Yes	20083	16571	16821	17338	3275.19	2232.18	1859.53	2002.13
chr15:85706615-85706638_+	mmu-let-7c-5p	chr15:85706615-85706637_+	22	23	85706615	85706638	+	Yes	No	2727	3023	2604	2756	444.726	407.211	287.867	318.253
chr15:85706615-85706639_+	mmu-let-7c-5p	chr15:85706615-85706637_+	22	24	85706615	85706639	+	Yes	No	1036	1165	1132	1299	168.954	156.93	125.14	150.004
chr15:85706615-85706640_+	mmu-let-7c-5p	chr15:85706615-85706637_+	22	25	85706615	85706640	+	Yes	No	49	43	47	44	7.99105	5.79228	5.19575	5.08096
chr15:85706616-85706636_+	mmu-let-7c-5p	chr15:85706615-85706637_+	22	20	85706616	85706636	+	No	No	24	34	16	30	3.91398	4.57994	1.76877	3.46429
chr15:85706616-85706637_+	mmu-let-7c-5p	chr15:85706615-85706637_+	22	21	85706616	85706637	+	No	Yes	282	246	253	424	45.9893	33.1372	27.9686	48.962
chr15:85706616-85706638_+	mmu-let-7c-5p	chr15:85706615-85706637_+	22	22	85706616	85706638	+	No	No	53	33	45	56	8.64338	4.44524	4.97465	6.46668
chr15:85706616-85706639_+	mmu-let-7c-5p	chr15:85706615-85706637_+	22	23	85706616	85706639	+	No	No	6	25	33	19	0.978496	3.3676	3.64808	2.19405
chr13:48536021-48536045_-	mmu-let-7d-3p	chr13:48536023-48536045_-	22	24	48536045	48536021	-	Yes	No	24	10	5	0	3.91398	1.34704	0.552739	0
chr13:48536022-48536044_-	mmu-let-7d-3p	chr13:48536023-48536045_-	22	22	48536044	48536022	-	No	No	13	10	10	29	2.12007	1.34704	1.10548	3.34882
chr13:48536022-48536045_-	mmu-let-7d-3p	chr13:48536023-48536045_-	22	23	48536045	48536022	-	Yes	No	34	50	77	73	5.54481	6.73521	8.51218	8.42978
chr13:48536023-48536044_-	mmu-let-7d-3p	chr13:48536023-48536045_-	22	21	48536044	48536023	-	No	Yes	379	361	847	659	61.8083	48.6282	93.634	76.099
chr13:48536023-48536045_-	mmu-let-7d-3p	chr13:48536023-48536045_-	22	22	48536045	48536023	-	Yes	Yes	4696	4114	11697	8562	765.836	554.173	1293.08	988.709
chr13:48536024-48536044_-	mmu-let-7d-3p	chr13:48536023-48536045_-	22	20	48536044	48536024	-	No	No	13	36	33	81	2.12007	4.84935	3.64808	9.35359
chr13:48536024-48536045_-	mmu-let-7d-3p	chr13:48536023-48536045_-	22	21	48536045	48536024	-	Yes	No	341	587	622	877	55.6112	79.0713	68.7608	101.273
chr13:48536025-48536044_-	mmu-let-7d-3p	chr13:48536023-48536045_-	22	19	48536044	48536025	-	No	No	0	12	0	9	0	1.61645	0	1.03929
chr13:48536025-48536045_-	mmu-let-7d-3p	chr13:48536023-48536045_-	22	20	48536045	48536025	-	Yes	No	19	205	28	136	3.09857	27.6143	3.09534	15.7048
chr13:48536026-48536044_-	mmu-let-7d-3p	chr13:48536023-48536045_-	22	18	48536044	48536026	-	No	No	0	10	0	0	0	1.34704	0	0
chr13:48536026-48536045_-	mmu-let-7d-3p	chr13:48536023-48536045_-	22	19	48536045	48536026	-	Yes	No	6	45	0	25	0.978496	6.06168	0	2.88691
chr13:48536027-48536045_-	mmu-let-7d-3p	chr13:48536023-48536045_-	22	18	48536045	48536027	-	Yes	No	9	43	5	30	1.46774	5.79228	0.552739	3.46429
chr13:48536073-48536099_-	mmu-let-7d-5p	chr13:48536077-48536099_-	22	26	48536099	48536073	-	Yes	No	3	6	17	14	0.489248	0.808225	1.87931	1.61667
chr13:48536074-48536099_-	mmu-let-7d-5p	chr13:48536077-48536099_-	22	25	48536099	48536074	-	Yes	No	87	78	95	96	14.1882	10.5069	10.502	11.0857
chr13:48536075-48536099_-	mmu-let-7d-5p	chr13:48536077-48536099_-	22	24	48536099	48536075	-	Yes	No	480	393	734	592	78.2796	52.9387	81.1421	68.362
chr13:48536075-48536100_-	mmu-let-7d-5p	chr13:48536077-48536099_-	22	25	48536100	48536075	-	No	No	0	1	2	9	0	0.134704	0.221096	1.03929
chr13:48536076-48536098_-	mmu-let-7d-5p	chr13:48536077-48536099_-	22	22	48536098	48536076	-	No	No	43	24	41	53	7.01255	3.2329	4.53246	6.12025
chr13:48536076-48536099_-	mmu-let-7d-5p	chr13:48536077-48536099_-	22	23	48536099	48536076	-	Yes	No	3048	2808	3394	3744	497.076	378.249	375.199	432.344
chr13:48536076-48536100_-	mmu-let-7d-5p	chr13:48536077-48536099_-	22	24	48536100	48536076	-	No	No	19	3	26	9	3.09857	0.404112	2.87424	1.03929
chr13:48536077-48536095_-	mmu-let-7d-5p	chr13:48536077-48536099_-	22	18	48536095	48536077	-	No	Yes	0	2	9	7	0	0.269408	0.994931	0.808335
chr13:48536077-48536098_-	mmu-let-7d-5p	chr13:48536077-48536099_-	22	21	48536098	48536077	-	No	Yes	312	203	182	346	50.8818	27.3449	20.1197	39.9548
chr13:48536077-48536099_-	mmu-let-7d-5p	chr13:48536077-48536099_-	22	22	48536099	48536077	-	Yes	Yes	22614	17888	20955	20145	3687.95	2409.59	2316.53	2326.27
chr13:48536077-48536100_-	mmu-let-7d-5p	chr13:48536077-48536099_-	22	23	48536100	48536077	-	No	Yes	177	132	288	179	28.8656	17.7809	31.8378	20.6703
chr13:48536078-48536098_-	mmu-let-7d-5p	chr13:48536077-48536099_-	22	20	48536098	48536078	-	No	No	34	90	59	66	5.54481	12.1234	6.52232	7.62144
chr13:48536078-48536099_-	mmu-let-7d-5p	chr13:48536077-48536099_-	22	21	48536099	48536078	-	Yes	No	4908	5557	4537	5964	800.409	748.551	501.556	688.701
chr13:48536078-48536100_-	mmu-let-7d-5p	chr13:48536077-48536099_-	22	22	48536100	48536078	-	No	No	235	177	312	303	38.3244	23.8426	34.4909	34.9894
chr13:48536079-48536098_-	mmu-let-7d-5p	chr13:48536077-48536099_-	22	19	48536098	48536079	-	No	No	8	19	5	18	1.30466	2.55938	0.552739	2.07858
chr13:48536079-48536099_-	mmu-let-7d-5p	chr13:48536077-48536099_-	22	20	48536099	48536079	-	Yes	No	903	1431	510	1581	147.264	192.762	56.3794	182.568
chr13:48536079-48536100_-	mmu-let-7d-5p	chr13:48536077-48536099_-	22	21	48536100	48536079	-	No	No	26	90	41	103	4.24015	12.1234	4.53246	11.8941
chr13:48536080-48536099_-	mmu-let-7d-5p	chr13:48536077-48536099_-	22	19	48536099	48536080	-	Yes	No	19	66	31	143	3.09857	8.89047	3.42698	16.5131
chr13:48536081-48536099_-	mmu-let-7d-5p	chr13:48536077-48536099_-	22	18	48536099	48536081	-	Yes	No	19	56	6	60	3.09857	7.54343	0.663287	6.92859
chr13:48536081-48536100_-	mmu-let-7d-5p	chr13:48536077-48536099_-	22	19	48536100	48536081	-	No	No	0	0	0	8	0	0	0	0.923811
chr13:48536082-48536100_-	mmu-let-7d-5p	chr13:48536077-48536099_-	22	18	48536100	48536082	-	No	No	0	4	0	12	0	0.538816	0	1.38572
chr17:17830410-17830432_+	mmu-let-7e-3p	chr17:17830410-17830432_+	22	22	17830410	17830432	+	Yes	Yes	26	15	5	0	4.24015	2.02056	0.552739	0
chr17:17830364-17830386_+	mmu-let-7e-5p	chr17:17830365-17830387_+	22	22	17830364	17830386	+	No	No	0	12	7	2	0	1.61645	0.773835	0.230953
chr17:17830364-17830387_+	mmu-let-7e-5p	chr17:17830365-17830387_+	22	23	17830364	17830387	+	No	Yes	17	16	15	21	2.7724	2.15527	1.65822	2.42501
chr17:17830365-17830383_+	mmu-let-7e-5p	chr17:17830365-17830387_+	22	18	17830365	17830383	+	Yes	No	12	5	0	0	1.95699	0.673521	0	0
chr17:17830365-17830384_+	mmu-let-7e-5p	chr17:17830365-17830387_+	22	19	17830365	17830384	+	Yes	No	11	7	4	2	1.79391	0.942929	0.442191	0.230953
chr17:17830365-17830385_+	mmu-let-7e-5p	chr17:17830365-17830387_+	22	20	17830365	17830385	+	Yes	No	253	279	50	53	41.2599	37.5824	5.52739	6.12025
chr17:17830365-17830386_+	mmu-let-7e-5p	chr17:17830365-17830387_+	22	21	17830365	17830386	+	Yes	No	1639	1165	537	300	267.292	156.93	59.3642	34.6429
chr17:17830365-17830387_+	mmu-let-7e-5p	chr17:17830365-17830387_+	22	22	17830365	17830387	+	Yes	Yes	8005	3942	2196	761	1305.48	531.004	242.763	87.8776
chr17:17830365-17830388_+	mmu-let-7e-5p	chr17:17830365-17830387_+	22	23	17830365	17830388	+	Yes	No	2298	1160	901	684	374.764	156.257	99.6036	78.9859
chr17:17830365-17830389_+	mmu-let-7e-5p	chr17:17830365-17830387_+	22	24	17830365	17830389	+	Yes	No	443	221	231	142	72.2456	29.7696	25.5366	16.3977
chr17:17830365-17830390_+	mmu-let-7e-5p	chr17:17830365-17830387_+	22	25	17830365	17830390	+	Yes	No	49	21	32	8	7.99105	2.82879	3.53753	0.923811
chr17:17830366-17830385_+	mmu-let-7e-5p	chr17:17830365-17830387_+	22	19	17830366	17830385	+	No	No	8	2	2	3	1.30466	0.269408	0.221096	0.346429
chr17:17830366-17830386_+	mmu-let-7e-5p	chr17:17830365-17830387_+	22	20	17830366	17830386	+	No	No	41	20	0	5	6.68639	2.69408	0	0.577382
chr17:17830366-17830387_+	mmu-let-7e-5p	chr17:17830365-17830387_+	22	21	17830366	17830387	+	No	Yes	116	46	32	6	18.9176	6.19639	3.53753	0.692859
chr17:17830366-17830388_+	mmu-let-7e-5p	chr17:17830365-17830387_+	22	22	17830366	17830388	+	No	No	32	6	16	8	5.21864	0.808225	1.76877	0.923811
chr17:17830366-17830389_+	mmu-let-7e-5p	chr17:17830365-17830387_+	22	23	17830366	17830389	+	No	No	3	1	11	2	0.489248	0.134704	1.21603	0.230953
chr13:48537831-48537854_-	mmu-let-7f-1-3p	chr13:48537832-48537854_-	22	23	48537854	48537831	-	Yes	No	0	13	0	0	0	1.75115	0	0
chr13:48537832-48537854_-	mmu-let-7f-1-3p	chr13:48537832-48537854_-	22	22	48537854	48537832	-	Yes	Yes	110	95	150	71	17.9391	12.7969	16.5822	8.19883
chr13:48537833-48537854_-	mmu-let-7f-1-3p	chr13:48537832-48537854_-	22	21	48537854	48537833	-	Yes	No	19	32	2	37	3.09857	4.31053	0.221096	4.27263
chrX:151912402-151912423_+	mmu-let-7f-2-3p	chrX:151912402-151912423_+	21	21	151912402	151912423	+	Yes	Yes	4	1	9	26	0.65233	0.134704	0.994931	3.00239
chrX:151912402-151912424_+	mmu-let-7f-2-3p	chrX:151912402-151912423_+	21	22	151912402	151912424	+	Yes	No	88	109	225	160	14.3513	14.6827	24.8733	18.4762
chrX:151912403-151912424_+	mmu-let-7f-2-3p	chrX:151912402-151912423_+	21	21	151912403	151912424	+	No	No	8	0	0	11	1.30466	0	0	1.27024
chrX:151912347-151912374_+	mmu-let-7f-5p	chrX:151912352-151912374_+	22	27	151912347	151912374	+	No	Yes	10	2	3	14	1.63083	0.269408	0.331644	1.61667
chrX:151912350-151912373_+	mmu-let-7f-5p	chrX:151912352-151912374_+	22	23	151912350	151912373	+	No	No	0	0	9	0	0	0	0.994931	0
chrX:151912350-151912374_+	mmu-let-7f-5p	chrX:151912352-151912374_+	22	24	151912350	151912374	+	No	Yes	28	12	14	11	4.56631	1.61645	1.54767	1.27024
chrX:151912351-151912373_+	mmu-let-7f-5p	chrX:151912352-151912374_+	22	22	151912351	151912373	+	No	No	4	37	32	47	0.65233	4.98405	3.53753	5.42739
chrX:151912351-151912374_+	mmu-let-7f-5p	chrX:151912352-151912374_+	22	23	151912351	151912374	+	No	Yes	108	160	232	220	17.6129	21.5527	25.6471	25.4048
chrX:151912351-151912375_+	mmu-let-7f-5p	chrX:151912352-151912374_+	22	24	151912351	151912375	+	No	No	11	12	13	10	1.79391	1.61645	1.43712	1.15476
chrX:151912352-151912370_+	mmu-let-7f-5p	chrX:151912352-151912374_+	22	18	151912352	151912370	+	Yes	No	56	140	83	221	9.13263	18.8586	9.17547	25.5203
chrX:151912352-151912371_+	mmu-let-7f-5p	chrX:151912352-151912374_+	22	19	151912352	151912371	+	Yes	No	80	207	176	322	13.0466	27.8837	19.4564	37.1834
chrX:151912352-151912372_+	mmu-let-7f-5p	chrX:151912352-151912374_+	22	20	151912352	151912372	+	Yes	No	2613	4044	1539	5668	426.135	544.743	170.133	654.52
chrX:151912352-151912373_+	mmu-let-7f-5p	chrX:151912352-151912374_+	22	21	151912352	151912373	+	Yes	No	21424	28009	31321	38571	3493.88	3772.93	3462.47	4454.04
chrX:151912352-151912374_+	mmu-let-7f-5p	chrX:151912352-151912374_+	22	22	151912352	151912374	+	Yes	Yes	169659	186712	281629	256596	27668.4	25150.9	31133.5	29630.8
chrX:151912352-151912375_+	mmu-let-7f-5p	chrX:151912352-151912374_+	22	23	151912352	151912375	+	Yes	No	15319	18623	25416	23638	2498.26	2508.59	2809.68	2729.63
chrX:151912352-151912376_+	mmu-let-7f-5p	chrX:151912352-151912374_+	22	24	151912352	151912376	+	Yes	No	482	548	972	775	78.6058	73.8178	107.453	89.4942
chrX:151912352-151912377_+	mmu-let-7f-5p	chrX:151912352-151912374_+	22	25	151912352	151912377	+	Yes	No	48	46	87	47	7.82796	6.19639	9.61766	5.42739
chrX:151912353-151912372_+	mmu-let-7f-5p	chrX:151912352-151912374_+	22	19	151912353	151912372	+	No	No	51	64	22	125	8.31721	8.62106	2.43205	14.4346
chrX:151912353-151912373_+	mmu-let-7f-5p	chrX:151912352-151912374_+	22	20	151912353	151912373	+	No	No	421	511	591	870	68.6578	68.8338	65.3338	100.464
chrX:151912353-151912374_+	mmu-let-7f-5p	chrX:151912352-151912374_+	22	21	151912353	151912374	+	No	Yes	3421	3937	5428	5929	557.906	530.33	600.054	684.66
chrX:151912353-151912375_+	mmu-let-7f-5p	chrX:151912352-151912374_+	22	22	151912353	151912375	+	No	No	336	395	567	627	54.7958	53.2081	62.6806	72.4037
chrX:151912353-151912376_+	mmu-let-7f-5p	chrX:151912352-151912374_+	22	23	151912353	151912376	+	No	No	21	7	20	17	3.42473	0.942929	2.21096	1.9631
chrX:151912354-151912374_+	mmu-let-7f-5p	chrX:151912352-151912374_+	22	20	151912354	151912374	+	No	Yes	15	10	7	9	2.44624	1.34704	0.773835	1.03929
chrX:151912355-151912374_+	mmu-let-7f-5p	chrX:151912352-151912374_+	22	19	151912355	151912374	+	No	Yes	36	47	45	94	5.87097	6.33109	4.97465	10.8548
chrX:151912355-151912375_+	mmu-let-7f-5p	chrX:151912352-151912374_+	22	20	151912355	151912375	+	No	No	4	6	4	11	0.65233	0.808225	0.442191	1.27024
chrX:151912356-151912374_+	mmu-let-7f-5p	chrX:151912352-151912374_+	22	18	151912356	151912374	+	No	Yes	44	52	71	102	7.17563	7.00461	7.8489	11.7786
chrX:151912356-151912375_+	mmu-let-7f-5p	chrX:151912352-151912374_+	22	19	151912356	151912375	+	No	No	19	19	8	6	3.09857	2.55938	0.884383	0.692859
chrX:151912357-151912375_+	mmu-let-7f-5p	chrX:151912352-151912374_+	22	18	151912357	151912375	+	No	No	0	0	11	7	0	0	1.21603	0.808335
chr9:106178896-106178919_+	mmu-let-7g-3p	chr9:106178901-106178923_+	22	23	106178896	106178919	+	No	No	0	10	0	0	0	1.34704	0	0
chr9:106178902-106178923_+	mmu-let-7g-3p	chr9:106178901-106178923_+	22	21	106178902	106178923	+	No	Yes	9	1	9	2	1.46774	0.134704	0.994931	0.230953
chr9:106178902-106178924_+	mmu-let-7g-3p	chr9:106178901-106178923_+	22	22	106178902	106178924	+	No	No	16	41	7	13	2.60932	5.52287	0.773835	1.50119
chr9:106178842-106178867_+	mmu-let-7g-5p	chr9:106178845-106178867_+	22	25	106178842	106178867	+	No	Yes	15	5	14	2	2.44624	0.673521	1.54767	0.230953
chr9:106178843-106178867_+	mmu-let-7g-5p	chr9:106178845-106178867_+	22	24	106178843	106178867	+	No	Yes	3	14	5	0	0.489248	1.88586	0.552739	0
chr9:106178844-106178866_+	mmu-let-7g-5p	chr9:106178845-106178867_+	22	22	106178844	106178866	+	No	No	49	16	64	20	7.99105	2.15527	7.07506	2.30953
chr9:106178844-106178867_+	mmu-let-7g-5p	chr9:106178845-106178867_+	22	23	106178844	106178867	+	No	Yes	155	119	253	114	25.2778	16.0298	27.9686	13.1643
chr9:106178844-106178868_+	mmu-let-7g-5p	chr9:106178845-106178867_+	22	24	106178844	106178868	+	No	No	3	5	12	18	0.489248	0.673521	1.32657	2.07858
chr9:106178845-106178863_+	mmu-let-7g-5p	chr9:106178845-106178867_+	22	18	106178845	106178863	+	Yes	No	39	52	35	125	6.36022	7.00461	3.86917	14.4346
chr9:106178845-106178864_+	mmu-let-7g-5p	chr9:106178845-106178867_+	22	19	106178845	106178864	+	Yes	No	46	85	73	94	7.5018	11.4498	8.06999	10.8548
chr9:106178845-106178865_+	mmu-let-7g-5p	chr9:106178845-106178867_+	22	20	106178845	106178865	+	Yes	No	956	1387	557	1454	155.907	186.835	61.5752	167.903
chr9:106178845-106178866_+	mmu-let-7g-5p	chr9:106178845-106178867_+	22	21	106178845	106178866	+	Yes	No	10587	11282	11727	11530	1726.56	1519.73	1296.39	1331.44
chr9:106178845-106178867_+	mmu-let-7g-5p	chr9:106178845-106178867_+	22	22	106178845	106178867	+	Yes	Yes	96557	78526	106624	72140	15746.8	10577.8	11787.1	8330.47
chr9:106178845-106178868_+	mmu-let-7g-5p	chr9:106178845-106178867_+	22	23	106178845	106178868	+	Yes	No	5821	5225	6842	5045	949.304	703.829	756.368	582.579
chr9:106178845-106178869_+	mmu-let-7g-5p	chr9:106178845-106178867_+	22	24	106178845	106178869	+	Yes	No	646	482	884	502	105.351	64.9274	97.7243	57.9692
chr9:106178845-106178870_+	mmu-let-7g-5p	chr9:106178845-106178867_+	22	25	106178845	106178870	+	Yes	No	40	12	39	22	6.5233	1.61645	4.31137	2.54048
chr9:106178846-106178864_+	mmu-let-7g-5p	chr9:106178845-106178867_+	22	18	106178846	106178864	+	No	No	2	2	6	11	0.326165	0.269408	0.663287	1.27024
chr9:106178846-106178865_+	mmu-let-7g-5p	chr9:106178845-106178867_+	22	19	106178846	106178865	+	No	No	15	28	7	46	2.44624	3.77171	0.773835	5.31192
chr9:106178846-106178866_+	mmu-let-7g-5p	chr9:106178845-106178867_+	22	20	106178846	106178866	+	No	No	440	470	595	553	71.7563	63.3109	65.776	63.8585
chr9:106178846-106178867_+	mmu-let-7g-5p	chr9:106178845-106178867_+	22	21	106178846	106178867	+	No	Yes	4103	3406	4428	3927	669.128	458.802	489.506	453.476
chr9:106178846-106178868_+	mmu-let-7g-5p	chr9:106178845-106178867_+	22	22	106178846	106178868	+	No	No	256	218	349	324	41.7491	29.3655	38.5812	37.4144
chr9:106178846-106178869_+	mmu-let-7g-5p	chr9:106178845-106178867_+	22	23	106178846	106178869	+	No	No	44	38	40	46	7.17563	5.11876	4.42191	5.31192
chr9:106178846-106178870_+	mmu-let-7g-5p	chr9:106178845-106178867_+	22	24	106178846	106178870	+	No	No	12	0	0	2	1.95699	0	0	0.230953
chr9:106178848-106178867_+	mmu-let-7g-5p	chr9:106178845-106178867_+	22	19	106178848	106178867	+	No	Yes	11	0	0	3	1.79391	0	0	0.346429
chr10:122985640-122985663_-	mmu-let-7i-3p	chr10:122985641-122985663_-	22	23	122985663	122985640	-	Yes	No	0	8	0	0	0	1.07763	0	0
chr10:122985641-122985663_-	mmu-let-7i-3p	chr10:122985641-122985663_-	22	22	122985663	122985641	-	Yes	Yes	53	73	75	52	8.64338	9.8334	8.29109	6.00477
chr10:122985642-122985663_-	mmu-let-7i-3p	chr10:122985641-122985663_-	22	21	122985663	122985642	-	Yes	No	31	35	66	17	5.05556	4.71464	7.29616	1.9631
chr10:122985643-122985663_-	mmu-let-7i-3p	chr10:122985641-122985663_-	22	20	122985663	122985643	-	Yes	No	1	36	2	31	0.163083	4.84935	0.221096	3.57977
chr10:122985684-122985703_-	mmu-let-7i-5p	chr10:122985697-122985719_-	22	19	122985703	122985684	-	No	No	9	0	0	0	1.46774	0	0	0
chr10:122985693-122985719_-	mmu-let-7i-5p	chr10:122985697-122985719_-	22	26	122985719	122985693	-	Yes	No	1	0	2	9	0.163083	0	0.221096	1.03929
chr10:122985694-122985719_-	mmu-let-7i-5p	chr10:122985697-122985719_-	22	25	122985719	122985694	-	Yes	No	109	84	191	151	17.776	11.3151	21.1146	17.4369
chr10:122985695-122985718_-	mmu-let-7i-5p	chr10:122985697-122985719_-	22	23	122985718	122985695	-	No	No	22	13	15	11	3.58782	1.75115	1.65822	1.27024
chr10:122985695-122985719_-	mmu-let-7i-5p	chr10:122985697-122985719_-	22	24	122985719	122985695	-	Yes	No	1014	875	1679	1110	165.366	117.866	185.61	128.179
chr10:122985696-122985716_-	mmu-let-7i-5p	chr10:122985697-122985719_-	22	20	122985716	122985696	-	No	No	2	5	8	10	0.326165	0.673521	0.884383	1.15476
chr10:122985696-122985718_-	mmu-let-7i-5p	chr10:122985697-122985719_-	22	22	122985718	122985696	-	No	No	203	213	216	208	33.1058	28.692	23.8783	24.0191
chr10:122985696-122985719_-	mmu-let-7i-5p	chr10:122985697-122985719_-	22	23	122985719	122985696	-	Yes	No	17088	17029	22175	17763	2786.76	2293.88	2451.4	2051.21
chr10:122985696-122985720_-	mmu-let-7i-5p	chr10:122985697-122985719_-	22	24	122985720	122985696	-	No	No	11	9	11	8	1.79391	1.21234	1.21603	0.923811
chr10:122985697-122985715_-	mmu-let-7i-5p	chr10:122985697-122985719_-	22	18	122985715	122985697	-	No	Yes	40	38	53	49	6.5233	5.11876	5.85904	5.65835
chr10:122985697-122985716_-	mmu-let-7i-5p	chr10:122985697-122985719_-	22	19	122985716	122985697	-	No	Yes	55	50	66	42	8.96954	6.73521	7.29616	4.85001
chr10:122985697-122985717_-	mmu-let-7i-5p	chr10:122985697-122985719_-	22	20	122985717	122985697	-	No	Yes	11	13	27	15	1.79391	1.75115	2.98479	1.73215
chr10:122985697-122985718_-	mmu-let-7i-5p	chr10:122985697-122985719_-	22	21	122985718	122985697	-	No	Yes	1223	1283	1563	1050	199.45	172.825	172.786	121.25
chr10:122985697-122985719_-	mmu-let-7i-5p	chr10:122985697-122985719_-	22	22	122985719	122985697	-	Yes	Yes	129891	147675	161078	114270	21183	19892.4	17806.8	13195.5
chr10:122985697-122985720_-	mmu-let-7i-5p	chr10:122985697-122985719_-	22	23	122985720	122985697	-	No	Yes	91	77	91	59	14.8405	10.3722	10.0599	6.81311
chr10:122985697-122985721_-	mmu-let-7i-5p	chr10:122985697-122985719_-	22	24	122985721	122985697	-	No	Yes	1	36	1	12	0.163083	4.84935	0.110548	1.38572
chr10:122985697-122985722_-	mmu-let-7i-5p	chr10:122985697-122985719_-	22	25	122985722	122985697	-	No	Yes	16	19	33	18	2.60932	2.55938	3.64808	2.07858
chr10:122985698-122985716_-	mmu-let-7i-5p	chr10:122985697-122985719_-	22	18	122985716	122985698	-	No	No	14	8	3	7	2.28316	1.07763	0.331644	0.808335
chr10:122985698-122985718_-	mmu-let-7i-5p	chr10:122985697-122985719_-	22	20	122985718	122985698	-	No	No	202	263	211	171	32.9427	35.4272	23.3256	19.7465
chr10:122985698-122985719_-	mmu-let-7i-5p	chr10:122985697-122985719_-	22	21	122985719	122985698	-	Yes	No	22627	27271	27909	21805	3690.07	3673.52	3085.28	2517.96
chr10:122985698-122985720_-	mmu-let-7i-5p	chr10:122985697-122985719_-	22	22	122985720	122985698	-	No	No	18	25	24	18	2.93549	3.3676	2.65315	2.07858
chr10:122985698-122985721_-	mmu-let-7i-5p	chr10:122985697-122985719_-	22	23	122985721	122985698	-	No	No	2	3	9	10	0.326165	0.404112	0.994931	1.15476
chr10:122985699-122985718_-	mmu-let-7i-5p	chr10:122985697-122985719_-	22	19	122985718	122985699	-	No	No	31	101	25	51	5.05556	13.6051	2.7637	5.8893
chr10:122985699-122985719_-	mmu-let-7i-5p	chr10:122985697-122985719_-	22	20	122985719	122985699	-	Yes	No	4153	8012	2742	5182	677.282	1079.25	303.122	598.399
chr10:122985699-122985721_-	mmu-let-7i-5p	chr10:122985697-122985719_-	22	22	122985721	122985699	-	No	No	1	9	5	5	0.163083	1.21234	0.552739	0.577382
chr10:122985700-122985718_-	mmu-let-7i-5p	chr10:122985697-122985719_-	22	18	122985718	122985700	-	No	No	10	10	6	10	1.63083	1.34704	0.663287	1.15476
chr10:122985700-122985719_-	mmu-let-7i-5p	chr10:122985697-122985719_-	22	19	122985719	122985700	-	Yes	No	230	361	208	316	37.509	48.6282	22.994	36.4906
chr10:122985701-122985719_-	mmu-let-7i-5p	chr10:122985697-122985719_-	22	18	122985719	122985701	-	Yes	No	3790	5041	90	4459	618.083	679.043	9.94931	514.909
chr4:101346954-101346977_-	mmu-miR-101a-3p	chr4:101346956-101346977_-	21	23	101346977	101346954	-	Yes	No	229	349	217	218	37.3459	47.0117	23.9889	25.1739
chr4:101346954-101346978_-	mmu-miR-101a-3p	chr4:101346956-101346977_-	21	24	101346978	101346954	-	No	No	36	43	10	24	5.87097	5.79228	1.10548	2.77143
chr4:101346955-101346976_-	mmu-miR-101a-3p	chr4:101346956-101346977_-	21	21	101346976	101346955	-	No	No	34	68	18	40	5.54481	9.15988	1.98986	4.61906
chr4:101346955-101346977_-	mmu-miR-101a-3p	chr4:101346956-101346977_-	21	22	101346977	101346955	-	Yes	No	4637	8994	3960	5606	756.214	1211.53	437.769	647.361
chr4:101346955-101346978_-	mmu-miR-101a-3p	chr4:101346956-101346977_-	21	23	101346978	101346955	-	No	No	293	725	417	655	47.7832	97.6605	46.0985	75.6371
chr4:101346956-101346975_-	mmu-miR-101a-3p	chr4:101346956-101346977_-	21	19	101346975	101346956	-	No	Yes	3	9	0	0	0.489248	1.21234	0	0
chr4:101346956-101346976_-	mmu-miR-101a-3p	chr4:101346956-101346977_-	21	20	101346976	101346956	-	No	Yes	12	11	12	16	1.95699	1.48175	1.32657	1.84762
chr4:101346956-101346977_-	mmu-miR-101a-3p	chr4:101346956-101346977_-	21	21	101346977	101346956	-	Yes	Yes	778	2144	923	1513	126.878	288.806	102.036	174.716
chr4:101346956-101346978_-	mmu-miR-101a-3p	chr4:101346956-101346977_-	21	22	101346978	101346956	-	No	Yes	2047	6288	2403	5249	333.83	847.019	265.646	606.136
chr4:101346956-101346979_-	mmu-miR-101a-3p	chr4:101346956-101346977_-	21	23	101346979	101346956	-	No	Yes	0	10	0	11	0	1.34704	0	1.27024
chr4:101346957-101346977_-	mmu-miR-101a-3p	chr4:101346956-101346977_-	21	20	101346977	101346957	-	Yes	No	305	379	358	370	49.7402	51.0529	39.5761	42.7263
chr4:101346957-101346978_-	mmu-miR-101a-3p	chr4:101346956-101346977_-	21	21	101346978	101346957	-	No	No	1273	2034	1263	1935	207.604	273.988	139.622	223.447
chr4:101346958-101346977_-	mmu-miR-101a-3p	chr4:101346956-101346977_-	21	19	101346977	101346958	-	Yes	No	34	87	33	58	5.54481	11.7193	3.64808	6.69763
chr4:101346958-101346978_-	mmu-miR-101a-3p	chr4:101346956-101346977_-	21	20	101346978	101346958	-	No	No	97	192	129	250	15.819	25.8632	14.2607	28.8691
chr4:101346959-101346977_-	mmu-miR-101a-3p	chr4:101346956-101346977_-	21	18	101346977	101346959	-	Yes	No	56	45	26	75	9.13263	6.06168	2.87424	8.66073
chr4:101346959-101346978_-	mmu-miR-101a-3p	chr4:101346956-101346977_-	21	19	101346978	101346959	-	No	No	197	343	243	447	32.1273	46.2035	26.8631	51.618
chr4:101346960-101346978_-	mmu-miR-101a-3p	chr4:101346956-101346977_-	21	18	101346978	101346960	-	No	No	68	196	8	192	11.0896	26.402	0.884383	22.1715
chr4:101346990-101347013_-	mmu-miR-101a-5p	chr4:101346992-101347014_-	22	23	101347013	101346990	-	No	No	1	11	0	0	0.163083	1.48175	0	0
chr4:101346992-101347013_-	mmu-miR-101a-5p	chr4:101346992-101347014_-	22	21	101347013	101346992	-	No	Yes	2	0	8	10	0.326165	0	0.884383	1.15476
chr4:101346992-101347014_-	mmu-miR-101a-5p	chr4:101346992-101347014_-	22	22	101347014	101346992	-	Yes	Yes	10	0	0	7	1.63083	0	0	0.808335
chr4:101347013-101347039_-	mmu-miR-101a-5p	chr4:101346992-101347014_-	22	26	101347039	101347013	-	No	No	0	9	0	0	0	1.21234	0	0
chr19:29135337-29135355_+	mmu-miR-101b-3p	chr19:29135337-29135356_+	19	18	29135337	29135355	+	Yes	No	87	237	11	570	14.1882	31.9249	1.21603	65.8216
chr19:29135337-29135356_+	mmu-miR-101b-3p	chr19:29135337-29135356_+	19	19	29135337	29135356	+	Yes	Yes	83	152	182	391	13.5359	20.475	20.1197	45.1513
chr19:29135337-29135357_+	mmu-miR-101b-3p	chr19:29135337-29135356_+	19	20	29135337	29135357	+	Yes	No	231	513	605	956	37.6721	69.1032	66.8815	110.395
chr19:29135337-29135358_+	mmu-miR-101b-3p	chr19:29135337-29135356_+	19	21	29135337	29135358	+	Yes	No	1340	2670	3504	5118	218.531	359.66	387.36	591.008
chr19:29135337-29135359_+	mmu-miR-101b-3p	chr19:29135337-29135356_+	19	22	29135337	29135359	+	Yes	No	1694	5899	7534	11313	276.262	794.619	832.868	1306.38
chr19:29135337-29135360_+	mmu-miR-101b-3p	chr19:29135337-29135356_+	19	23	29135337	29135360	+	Yes	No	531	1141	1924	2387	86.5969	153.697	212.694	275.642
chr19:29135337-29135361_+	mmu-miR-101b-3p	chr19:29135337-29135356_+	19	24	29135337	29135361	+	Yes	No	62	55	100	168	10.1111	7.40873	11.0548	19.4
chr19:29135337-29135362_+	mmu-miR-101b-3p	chr19:29135337-29135356_+	19	25	29135337	29135362	+	Yes	No	0	0	6	11	0	0	0.663287	1.27024
chr19:29135338-29135356_+	mmu-miR-101b-3p	chr19:29135337-29135356_+	19	18	29135338	29135356	+	No	Yes	9	63	66	68	1.46774	8.48636	7.29616	7.8524
chr19:29135338-29135357_+	mmu-miR-101b-3p	chr19:29135337-29135356_+	19	19	29135338	29135357	+	No	No	52	153	117	190	8.4803	20.6097	12.9341	21.9405
chr19:29135338-29135358_+	mmu-miR-101b-3p	chr19:29135337-29135356_+	19	20	29135338	29135358	+	No	No	263	421	565	821	42.8907	56.7104	62.4595	94.8062
chr19:29135338-29135359_+	mmu-miR-101b-3p	chr19:29135337-29135356_+	19	21	29135338	29135359	+	No	No	321	1012	1270	1818	52.3495	136.321	140.396	209.936
chr19:29135338-29135360_+	mmu-miR-101b-3p	chr19:29135337-29135356_+	19	22	29135338	29135360	+	No	No	2907	7241	9539	11201	474.081	975.392	1054.52	1293.45
chr19:29135338-29135361_+	mmu-miR-101b-3p	chr19:29135337-29135356_+	19	23	29135338	29135361	+	No	No	595	1837	2095	2435	97.0341	247.451	231.598	281.185
chr19:29135338-29135362_+	mmu-miR-101b-3p	chr19:29135337-29135356_+	19	24	29135338	29135362	+	No	No	12	32	41	72	1.95699	4.31053	4.53246	8.3143
chr19:29135338-29135363_+	mmu-miR-101b-3p	chr19:29135337-29135356_+	19	25	29135338	29135363	+	No	No	4	14	11	18	0.65233	1.88586	1.21603	2.07858
chr19:29135339-29135357_+	mmu-miR-101b-3p	chr19:29135337-29135356_+	19	18	29135339	29135357	+	No	No	1	8	0	9	0.163083	1.07763	0	1.03929
chr19:29135339-29135358_+	mmu-miR-101b-3p	chr19:29135337-29135356_+	19	19	29135339	29135358	+	No	No	7	5	29	42	1.14158	0.673521	3.20589	4.85001
chr19:29135339-29135359_+	mmu-miR-101b-3p	chr19:29135337-29135356_+	19	20	29135339	29135359	+	No	No	7	25	24	64	1.14158	3.3676	2.65315	7.39049
chr19:29135339-29135360_+	mmu-miR-101b-3p	chr19:29135337-29135356_+	19	21	29135339	29135360	+	No	No	73	169	208	359	11.905	22.765	22.994	41.456
chr19:29135339-29135361_+	mmu-miR-101b-3p	chr19:29135337-29135356_+	19	22	29135339	29135361	+	No	No	79	129	274	323	12.8835	17.3768	30.2901	37.2989
chr19:29135339-29135362_+	mmu-miR-101b-3p	chr19:29135337-29135356_+	19	23	29135339	29135362	+	No	No	3	14	4	11	0.489248	1.88586	0.442191	1.27024
chr19:29135340-29135360_+	mmu-miR-101b-3p	chr19:29135337-29135356_+	19	20	29135340	29135360	+	No	No	3	12	21	13	0.489248	1.61645	2.3215	1.50119
chr19:29135340-29135361_+	mmu-miR-101b-3p	chr19:29135337-29135356_+	19	21	29135340	29135361	+	No	No	3	19	39	23	0.489248	2.55938	4.31137	2.65596
chr19:29135340-29135362_+	mmu-miR-101b-3p	chr19:29135337-29135356_+	19	22	29135340	29135362	+	No	No	7	3	10	17	1.14158	0.404112	1.10548	1.9631
chr19:29135302-29135325_+	mmu-miR-101b-5p	chr19:29135301-29135324_+	23	23	29135302	29135325	+	No	No	0	0	5	9	0	0	0.552739	1.03929
chr9:3038677-3038697_-	mmu-miR-101c	chr9:3038679-3038698_-	19	20	3038697	3038677	-	No	No	0	1	0	12	0	0.134704	0	1.38572
chr9:3038677-3038698_-	mmu-miR-101c	chr9:3038679-3038698_-	19	21	3038698	3038677	-	Yes	No	32	100	24	61	5.21864	13.4704	2.65315	7.04406
chr9:3038677-3038699_-	mmu-miR-101c	chr9:3038679-3038698_-	19	22	3038699	3038677	-	No	No	503	1594	346	891	82.0305	214.718	38.2496	102.89
chr9:3038677-3038700_-	mmu-miR-101c	chr9:3038679-3038698_-	19	23	3038700	3038677	-	No	No	4	7	4	9	0.65233	0.942929	0.442191	1.03929
chr9:3038678-3038699_-	mmu-miR-101c	chr9:3038679-3038698_-	19	21	3038699	3038678	-	No	No	3	5	6	8	0.489248	0.673521	0.663287	0.923811
chr9:3038678-3038700_-	mmu-miR-101c	chr9:3038679-3038698_-	19	22	3038700	3038678	-	No	No	5	14	5	12	0.815413	1.88586	0.552739	1.38572
chr11:35782445-35782468_+	mmu-miR-103-3p	chr11:35782446-35782469_+	23	23	35782445	35782468	+	No	No	0	9	5	8	0	1.21234	0.552739	0.923811
chr11:35782445-35782469_+	mmu-miR-103-3p	chr11:35782446-35782469_+	23	24	35782445	35782469	+	No	Yes	1	2	9	2	0.163083	0.269408	0.994931	0.230953
chr11:35782446-35782464_+	mmu-miR-103-3p	chr11:35782446-35782469_+	23	18	35782446	35782464	+	Yes	No	58	148	43	166	9.45879	19.9362	4.75356	19.1691
chr11:35782446-35782465_+	mmu-miR-103-3p	chr11:35782446-35782469_+	23	19	35782446	35782465	+	Yes	No	51	288	80	251	8.31721	38.7948	8.84383	28.9846
chr11:35782446-35782466_+	mmu-miR-103-3p	chr11:35782446-35782469_+	23	20	35782446	35782466	+	Yes	No	783	1317	168	1591	127.694	177.405	18.572	183.723
chr11:35782446-35782467_+	mmu-miR-103-3p	chr11:35782446-35782469_+	23	21	35782446	35782467	+	Yes	No	1014	1646	1299	1931	165.366	221.723	143.602	222.985
chr11:35782446-35782468_+	mmu-miR-103-3p	chr11:35782446-35782469_+	23	22	35782446	35782468	+	Yes	No	9548	15098	15342	20917	1557.11	2033.76	1696.03	2415.42
chr11:35782446-35782469_+	mmu-miR-103-3p	chr11:35782446-35782469_+	23	23	35782446	35782469	+	Yes	Yes	11166	13518	16779	15047	1820.98	1820.93	1854.88	1737.57
chr11:35782446-35782470_+	mmu-miR-103-3p	chr11:35782446-35782469_+	23	24	35782446	35782470	+	Yes	No	1081	1343	1693	1585	176.292	180.908	187.158	183.03
chr11:35782446-35782471_+	mmu-miR-103-3p	chr11:35782446-35782469_+	23	25	35782446	35782471	+	Yes	No	234	224	506	335	38.1613	30.1737	55.9372	38.6846
chr11:35782446-35782472_+	mmu-miR-103-3p	chr11:35782446-35782469_+	23	26	35782446	35782472	+	Yes	No	24	12	45	20	3.91398	1.61645	4.97465	2.30953
chr11:35782447-35782466_+	mmu-miR-103-3p	chr11:35782446-35782469_+	23	19	35782447	35782466	+	No	No	9	10	4	7	1.46774	1.34704	0.442191	0.808335
chr11:35782447-35782467_+	mmu-miR-103-3p	chr11:35782446-35782469_+	23	20	35782447	35782467	+	No	No	4	11	9	17	0.65233	1.48175	0.994931	1.9631
chr11:35782447-35782468_+	mmu-miR-103-3p	chr11:35782446-35782469_+	23	21	35782447	35782468	+	No	No	68	118	87	133	11.0896	15.8951	9.61766	15.3584
chr11:35782447-35782469_+	mmu-miR-103-3p	chr11:35782446-35782469_+	23	22	35782447	35782469	+	No	Yes	101	123	118	142	16.4713	16.5686	13.0446	16.3977
chr11:35782447-35782470_+	mmu-miR-103-3p	chr11:35782446-35782469_+	23	23	35782447	35782470	+	No	No	11	11	21	1	1.79391	1.48175	2.3215	0.115476
chr11:35782448-35782466_+	mmu-miR-103-3p	chr11:35782446-35782469_+	23	18	35782448	35782466	+	No	No	1	2	0	9	0.163083	0.269408	0	1.03929
chr11:35782448-35782468_+	mmu-miR-103-3p	chr11:35782446-35782469_+	23	20	35782448	35782468	+	No	No	12	65	42	55	1.95699	8.75577	4.64301	6.3512
chr11:35782448-35782469_+	mmu-miR-103-3p	chr11:35782446-35782469_+	23	21	35782448	35782469	+	No	Yes	82	116	205	171	13.3728	15.6257	22.6623	19.7465
chr11:35782448-35782470_+	mmu-miR-103-3p	chr11:35782446-35782469_+	23	22	35782448	35782470	+	No	No	25	17	7	23	4.07706	2.28997	0.773835	2.65596
chr11:35782449-35782468_+	mmu-miR-103-3p	chr11:35782446-35782469_+	23	19	35782449	35782468	+	No	No	2	6	3	12	0.326165	0.808225	0.331644	1.38572
chr11:35782449-35782469_+	mmu-miR-103-3p	chr11:35782446-35782469_+	23	20	35782449	35782469	+	No	Yes	2	0	10	5	0.326165	0	1.10548	0.577382
chr11:35782450-35782469_+	mmu-miR-103-3p	chr11:35782446-35782469_+	23	19	35782450	35782469	+	No	Yes	21	20	32	30	3.42473	2.69408	3.53753	3.46429
chr5:138165742-138165767_-	mmu-miR-106b-3p	chr5:138165745-138165767_-	22	25	138165767	138165742	-	Yes	No	0	20	13	7	0	2.69408	1.43712	0.808335
chr5:138165743-138165766_-	mmu-miR-106b-3p	chr5:138165745-138165767_-	22	23	138165766	138165743	-	No	No	7	6	14	0	1.14158	0.808225	1.54767	0
chr5:138165743-138165767_-	mmu-miR-106b-3p	chr5:138165745-138165767_-	22	24	138165767	138165743	-	Yes	No	130	119	212	163	21.2007	16.0298	23.4361	18.8227
chr5:138165744-138165766_-	mmu-miR-106b-3p	chr5:138165745-138165767_-	22	22	138165766	138165744	-	No	No	10	11	18	6	1.63083	1.48175	1.98986	0.692859
chr5:138165744-138165767_-	mmu-miR-106b-3p	chr5:138165745-138165767_-	22	23	138165767	138165744	-	Yes	No	443	390	646	399	72.2456	52.5346	71.4139	46.0751
chr5:138165744-138165769_-	mmu-miR-106b-3p	chr5:138165745-138165767_-	22	25	138165769	138165744	-	No	No	6	0	9	4	0.978496	0	0.994931	0.461906
chr5:138165745-138165766_-	mmu-miR-106b-3p	chr5:138165745-138165767_-	22	21	138165766	138165745	-	No	Yes	58	11	81	20	9.45879	1.48175	8.95438	2.30953
chr5:138165745-138165767_-	mmu-miR-106b-3p	chr5:138165745-138165767_-	22	22	138165767	138165745	-	Yes	Yes	2280	1312	3753	1487	371.828	176.732	414.886	171.713
chr5:138165745-138165768_-	mmu-miR-106b-3p	chr5:138165745-138165767_-	22	23	138165768	138165745	-	No	Yes	28	30	32	21	4.56631	4.04112	3.53753	2.42501
chr5:138165745-138165769_-	mmu-miR-106b-3p	chr5:138165745-138165767_-	22	24	138165769	138165745	-	No	Yes	81	24	121	27	13.2097	3.2329	13.3763	3.11786
chr5:138165746-138165766_-	mmu-miR-106b-3p	chr5:138165745-138165767_-	22	20	138165766	138165746	-	No	No	31	39	75	68	5.05556	5.25346	8.29109	7.8524
chr5:138165746-138165767_-	mmu-miR-106b-3p	chr5:138165745-138165767_-	22	21	138165767	138165746	-	Yes	No	1779	2016	3579	2506	290.124	271.563	395.651	289.384
chr5:138165746-138165768_-	mmu-miR-106b-3p	chr5:138165745-138165767_-	22	22	138165768	138165746	-	No	No	64	47	92	39	10.4373	6.33109	10.1704	4.50358
chr5:138165746-138165769_-	mmu-miR-106b-3p	chr5:138165745-138165767_-	22	23	138165769	138165746	-	No	No	37	40	28	20	6.03406	5.38816	3.09534	2.30953
chr5:138165747-138165766_-	mmu-miR-106b-3p	chr5:138165745-138165767_-	22	19	138165766	138165747	-	No	No	40	47	31	52	6.5233	6.33109	3.42698	6.00477
chr5:138165747-138165767_-	mmu-miR-106b-3p	chr5:138165745-138165767_-	22	20	138165767	138165747	-	Yes	No	1367	2107	2493	2385	222.934	283.822	275.596	275.411
chr5:138165747-138165768_-	mmu-miR-106b-3p	chr5:138165745-138165767_-	22	21	138165768	138165747	-	No	No	80	146	93	134	13.0466	19.6668	10.281	15.4738
chr5:138165747-138165769_-	mmu-miR-106b-3p	chr5:138165745-138165767_-	22	22	138165769	138165747	-	No	No	972	1062	1038	987	158.516	143.056	114.749	113.975
chr5:138165748-138165766_-	mmu-miR-106b-3p	chr5:138165745-138165767_-	22	18	138165766	138165748	-	No	No	0	2	0	8	0	0.269408	0	0.923811
chr5:138165748-138165767_-	mmu-miR-106b-3p	chr5:138165745-138165767_-	22	19	138165767	138165748	-	Yes	No	475	437	421	543	77.4642	58.8657	46.5406	62.7037
chr5:138165748-138165768_-	mmu-miR-106b-3p	chr5:138165745-138165767_-	22	20	138165768	138165748	-	No	No	21	33	29	14	3.42473	4.44524	3.20589	1.61667
chr5:138165748-138165769_-	mmu-miR-106b-3p	chr5:138165745-138165767_-	22	21	138165769	138165748	-	No	No	95	125	135	132	15.4928	16.838	14.924	15.2429
chr5:138165749-138165767_-	mmu-miR-106b-3p	chr5:138165745-138165767_-	22	18	138165767	138165749	-	Yes	No	1	39	17	41	0.163083	5.25346	1.87931	4.73453
chr5:138165751-138165769_-	mmu-miR-106b-3p	chr5:138165745-138165767_-	22	18	138165769	138165751	-	No	No	5	13	0	24	0.815413	1.75115	0	2.77143
chr5:138165783-138165807_-	mmu-miR-106b-5p	chr5:138165786-138165807_-	21	24	138165807	138165783	-	Yes	No	14	13	17	8	2.28316	1.75115	1.87931	0.923811
chr5:138165784-138165807_-	mmu-miR-106b-5p	chr5:138165786-138165807_-	21	23	138165807	138165784	-	Yes	No	42	29	41	34	6.84947	3.90642	4.53246	3.9262
chr5:138165785-138165806_-	mmu-miR-106b-5p	chr5:138165786-138165807_-	21	21	138165806	138165785	-	No	No	8	0	0	0	1.30466	0	0	0
chr5:138165785-138165807_-	mmu-miR-106b-5p	chr5:138165786-138165807_-	21	22	138165807	138165785	-	Yes	No	316	247	475	272	51.5341	33.2719	52.5102	31.4096
chr5:138165786-138165806_-	mmu-miR-106b-5p	chr5:138165786-138165807_-	21	20	138165806	138165786	-	No	Yes	7	13	5	9	1.14158	1.75115	0.552739	1.03929
chr5:138165786-138165807_-	mmu-miR-106b-5p	chr5:138165786-138165807_-	21	21	138165807	138165786	-	Yes	Yes	231	372	463	279	37.6721	50.1099	51.1837	32.2179
chr5:138165787-138165806_-	mmu-miR-106b-5p	chr5:138165786-138165807_-	21	19	138165806	138165787	-	No	No	1	2	2	12	0.163083	0.269408	0.221096	1.38572
chr5:138165787-138165807_-	mmu-miR-106b-5p	chr5:138165786-138165807_-	21	20	138165807	138165787	-	Yes	No	124	323	244	255	20.2222	43.5094	26.9737	29.4465
chr5:138165788-138165807_-	mmu-miR-106b-5p	chr5:138165786-138165807_-	21	19	138165807	138165788	-	Yes	No	25	44	74	42	4.07706	5.92698	8.18054	4.85001
chr19:34820698-34820722_-	mmu-miR-107-3p	chr19:34820699-34820722_-	23	24	34820722	34820698	-	Yes	No	58	74	83	37	9.45879	9.9681	9.17547	4.27263
chr19:34820699-34820720_-	mmu-miR-107-3p	chr19:34820699-34820722_-	23	21	34820720	34820699	-	No	Yes	7	10	12	11	1.14158	1.34704	1.32657	1.27024
chr19:34820699-34820721_-	mmu-miR-107-3p	chr19:34820699-34820722_-	23	22	34820721	34820699	-	No	Yes	2	6	16	6	0.326165	0.808225	1.76877	0.692859
chr19:34820699-34820722_-	mmu-miR-107-3p	chr19:34820699-34820722_-	23	23	34820722	34820699	-	Yes	Yes	279	314	591	335	45.5	42.2971	65.3338	38.6846
chr19:34820700-34820720_-	mmu-miR-107-3p	chr19:34820699-34820722_-	23	20	34820720	34820700	-	No	No	1	11	4	2	0.163083	1.48175	0.442191	0.230953
chr19:34820700-34820721_-	mmu-miR-107-3p	chr19:34820699-34820722_-	23	21	34820721	34820700	-	No	No	13	9	16	16	2.12007	1.21234	1.76877	1.84762
chr19:34820700-34820722_-	mmu-miR-107-3p	chr19:34820699-34820722_-	23	22	34820722	34820700	-	Yes	No	703	743	1294	924	114.647	100.085	143.049	106.7
chr19:34820701-34820721_-	mmu-miR-107-3p	chr19:34820699-34820722_-	23	20	34820721	34820701	-	No	No	7	13	4	8	1.14158	1.75115	0.442191	0.923811
chr19:34820701-34820722_-	mmu-miR-107-3p	chr19:34820699-34820722_-	23	21	34820722	34820701	-	Yes	No	929	1597	1275	1913	151.504	215.122	140.949	220.906
chr19:34820702-34820720_-	mmu-miR-107-3p	chr19:34820699-34820722_-	23	18	34820720	34820702	-	No	No	1	7	0	8	0.163083	0.942929	0	0.923811
chr19:34820702-34820721_-	mmu-miR-107-3p	chr19:34820699-34820722_-	23	19	34820721	34820702	-	No	No	8	10	4	10	1.30466	1.34704	0.442191	1.15476
chr19:34820702-34820722_-	mmu-miR-107-3p	chr19:34820699-34820722_-	23	20	34820722	34820702	-	Yes	No	883	1268	178	1577	144.002	170.805	19.6775	182.106
chr19:34820703-34820722_-	mmu-miR-107-3p	chr19:34820699-34820722_-	23	19	34820722	34820703	-	Yes	No	59	240	79	241	9.62187	32.329	8.73328	27.8298
chr19:34820704-34820722_-	mmu-miR-107-3p	chr19:34820699-34820722_-	23	18	34820722	34820704	-	Yes	No	61	151	38	183	9.94804	20.3403	4.20082	21.1322
chr11:96317225-96317247_+	mmu-miR-10a-3p	chr11:96317226-96317248_+	22	22	96317225	96317247	+	No	No	5	0	10	0	0.815413	0	1.10548	0
chr11:96317226-96317247_+	mmu-miR-10a-3p	chr11:96317226-96317248_+	22	21	96317226	96317247	+	Yes	No	77	46	66	19	12.5574	6.19639	7.29616	2.19405
chr11:96317226-96317248_+	mmu-miR-10a-3p	chr11:96317226-96317248_+	22	22	96317226	96317248	+	Yes	Yes	8	10	0	0	1.30466	1.34704	0	0
chr11:96317227-96317247_+	mmu-miR-10a-3p	chr11:96317226-96317248_+	22	20	96317227	96317247	+	No	No	10	9	5	7	1.63083	1.21234	0.552739	0.808335
chr11:96317227-96317248_+	mmu-miR-10a-3p	chr11:96317226-96317248_+	22	21	96317227	96317248	+	No	Yes	15	0	0	0	2.44624	0	0	0
chr11:96317182-96317207_+	mmu-miR-10a-5p	chr11:96317185-96317208_+	23	25	96317182	96317207	+	No	No	11	8	1	7	1.79391	1.07763	0.110548	0.808335
chr11:96317183-96317207_+	mmu-miR-10a-5p	chr11:96317185-96317208_+	23	24	96317183	96317207	+	No	No	38	40	16	5	6.19714	5.38816	1.76877	0.577382
chr11:96317184-96317203_+	mmu-miR-10a-5p	chr11:96317185-96317208_+	23	19	96317184	96317203	+	No	No	19	26	0	18	3.09857	3.50231	0	2.07858
chr11:96317184-96317204_+	mmu-miR-10a-5p	chr11:96317185-96317208_+	23	20	96317184	96317204	+	No	No	63	53	3	19	10.2742	7.13932	0.331644	2.19405
chr11:96317184-96317205_+	mmu-miR-10a-5p	chr11:96317185-96317208_+	23	21	96317184	96317205	+	No	No	96	130	29	27	15.6559	17.5115	3.20589	3.11786
chr11:96317184-96317206_+	mmu-miR-10a-5p	chr11:96317185-96317208_+	23	22	96317184	96317206	+	No	No	436	387	243	158	71.104	52.1305	26.8631	18.2453
chr11:96317184-96317207_+	mmu-miR-10a-5p	chr11:96317185-96317208_+	23	23	96317184	96317207	+	No	No	4480	3883	3397	1970	730.61	523.056	375.531	227.489
chr11:96317184-96317208_+	mmu-miR-10a-5p	chr11:96317185-96317208_+	23	24	96317184	96317208	+	No	Yes	233	132	155	43	37.9982	17.7809	17.1349	4.96549
chr11:96317184-96317209_+	mmu-miR-10a-5p	chr11:96317185-96317208_+	23	25	96317184	96317209	+	No	No	229	128	177	32	37.3459	17.2421	19.567	3.69525
chr11:96317185-96317203_+	mmu-miR-10a-5p	chr11:96317185-96317208_+	23	18	96317185	96317203	+	Yes	No	1284	1317	28	847	209.398	177.405	3.09534	97.8085
chr11:96317185-96317204_+	mmu-miR-10a-5p	chr11:96317185-96317208_+	23	19	96317185	96317204	+	Yes	No	5304	4728	121	1885	864.99	636.881	13.3763	217.673
chr11:96317185-96317205_+	mmu-miR-10a-5p	chr11:96317185-96317208_+	23	20	96317185	96317205	+	Yes	No	567	966	494	412	92.4678	130.124	54.6106	47.5763
chr11:96317185-96317206_+	mmu-miR-10a-5p	chr11:96317185-96317208_+	23	21	96317185	96317206	+	Yes	No	8776	9438	1705	2982	1431.21	1271.34	188.484	344.351
chr11:96317185-96317207_+	mmu-miR-10a-5p	chr11:96317185-96317208_+	23	22	96317185	96317207	+	Yes	No	475738	367269	289382	144689	77584.6	49472.6	31990.6	16708.2
chr11:96317185-96317208_+	mmu-miR-10a-5p	chr11:96317185-96317208_+	23	23	96317185	96317208	+	Yes	Yes	47745	29597	20750	8380	7786.38	3986.84	2293.87	967.693
chr11:96317185-96317209_+	mmu-miR-10a-5p	chr11:96317185-96317208_+	23	24	96317185	96317209	+	Yes	No	32289	27014	23529	9748	5265.77	3638.9	2601.08	1125.66
chr11:96317185-96317210_+	mmu-miR-10a-5p	chr11:96317185-96317208_+	23	25	96317185	96317210	+	Yes	No	445	481	452	155	72.5718	64.7927	49.9676	17.8988
chr11:96317185-96317211_+	mmu-miR-10a-5p	chr11:96317185-96317208_+	23	26	96317185	96317211	+	Yes	No	68	69	97	27	11.0896	9.29458	10.7231	3.11786
chr11:96317186-96317204_+	mmu-miR-10a-5p	chr11:96317185-96317208_+	23	18	96317186	96317204	+	No	No	823	885	35	535	134.217	119.213	3.86917	61.7799
chr11:96317186-96317205_+	mmu-miR-10a-5p	chr11:96317185-96317208_+	23	19	96317186	96317205	+	No	No	82	112	66	65	13.3728	15.0869	7.29616	7.50597
chr11:96317186-96317206_+	mmu-miR-10a-5p	chr11:96317185-96317208_+	23	20	96317186	96317206	+	No	No	3603	3102	195	1341	587.587	417.852	21.5568	154.854
chr11:96317186-96317207_+	mmu-miR-10a-5p	chr11:96317185-96317208_+	23	21	96317186	96317207	+	No	No	62870	59581	44287	26383	10253	8025.81	4895.83	3046.61
chr11:96317186-96317208_+	mmu-miR-10a-5p	chr11:96317185-96317208_+	23	22	96317186	96317208	+	No	Yes	43714	31007	22010	9525	7128.99	4176.77	2433.16	1099.91
chr11:96317186-96317209_+	mmu-miR-10a-5p	chr11:96317185-96317208_+	23	23	96317186	96317209	+	No	No	44669	38869	34836	17173	7284.74	5235.81	3851.05	1983.08
chr11:96317186-96317210_+	mmu-miR-10a-5p	chr11:96317185-96317208_+	23	24	96317186	96317210	+	No	No	579	658	613	320	94.4248	88.6353	67.7658	36.9525
chr11:96317186-96317211_+	mmu-miR-10a-5p	chr11:96317185-96317208_+	23	25	96317186	96317211	+	No	No	97	102	114	25	15.819	13.7398	12.6025	2.88691
chr11:96317186-96317212_+	mmu-miR-10a-5p	chr11:96317185-96317208_+	23	26	96317186	96317212	+	No	No	2	0	5	10	0.326165	0	0.552739	1.15476
chr11:96317187-96317206_+	mmu-miR-10a-5p	chr11:96317185-96317208_+	23	19	96317187	96317206	+	No	No	12	25	0	13	1.95699	3.3676	0	1.50119
chr11:96317187-96317207_+	mmu-miR-10a-5p	chr11:96317185-96317208_+	23	20	96317187	96317207	+	No	No	293	324	259	152	47.7832	43.6441	28.6319	17.5524
chr11:96317187-96317208_+	mmu-miR-10a-5p	chr11:96317185-96317208_+	23	21	96317187	96317208	+	No	Yes	298	313	186	84	48.5986	42.1624	20.5619	9.70002
chr11:96317187-96317209_+	mmu-miR-10a-5p	chr11:96317185-96317208_+	23	22	96317187	96317209	+	No	No	384	467	442	228	62.6237	62.9068	48.8622	26.3286
chr11:96317187-96317210_+	mmu-miR-10a-5p	chr11:96317185-96317208_+	23	23	96317187	96317210	+	No	No	22	32	42	5	3.58782	4.31053	4.64301	0.577382
chr11:96317187-96317211_+	mmu-miR-10a-5p	chr11:96317185-96317208_+	23	24	96317187	96317211	+	No	No	4	9	2	0	0.65233	1.21234	0.221096	0
chr11:96317188-96317206_+	mmu-miR-10a-5p	chr11:96317185-96317208_+	23	18	96317188	96317206	+	No	No	21	46	0	20	3.42473	6.19639	0	2.30953
chr11:96317188-96317207_+	mmu-miR-10a-5p	chr11:96317185-96317208_+	23	19	96317188	96317207	+	No	No	1233	1035	876	508	201.081	139.419	96.8399	58.662
chr11:96317188-96317208_+	mmu-miR-10a-5p	chr11:96317185-96317208_+	23	20	96317188	96317208	+	No	Yes	408	236	185	113	66.5377	31.7902	20.4514	13.0488
chr11:96317188-96317209_+	mmu-miR-10a-5p	chr11:96317185-96317208_+	23	21	96317188	96317209	+	No	No	342	237	209	122	55.7742	31.9249	23.1045	14.0881
chr11:96317188-96317210_+	mmu-miR-10a-5p	chr11:96317185-96317208_+	23	22	96317188	96317210	+	No	No	17	0	4	6	2.7724	0	0.442191	0.692859
chr11:96317189-96317207_+	mmu-miR-10a-5p	chr11:96317185-96317208_+	23	18	96317189	96317207	+	No	No	1197	1232	1060	570	195.21	165.955	117.181	65.8216
chr11:96317189-96317208_+	mmu-miR-10a-5p	chr11:96317185-96317208_+	23	19	96317189	96317208	+	No	Yes	311	225	123	58	50.7187	30.3084	13.5974	6.69763
chr11:96317189-96317209_+	mmu-miR-10a-5p	chr11:96317185-96317208_+	23	20	96317189	96317209	+	No	No	328	270	211	164	53.4911	36.3701	23.3256	18.9381
chr11:96317189-96317210_+	mmu-miR-10a-5p	chr11:96317185-96317208_+	23	21	96317189	96317210	+	No	No	11	11	8	6	1.79391	1.48175	0.884383	0.692859
chr11:96317190-96317208_+	mmu-miR-10a-5p	chr11:96317185-96317208_+	23	18	96317190	96317208	+	No	Yes	98	60	29	28	15.9821	8.08225	3.20589	3.23334
chr11:96317190-96317209_+	mmu-miR-10a-5p	chr11:96317185-96317208_+	23	19	96317190	96317209	+	No	No	42	30	35	14	6.84947	4.04112	3.86917	1.61667
chr2:74726073-74726091_+	mmu-miR-10b-5p	chr2:74726073-74726096_+	23	18	74726073	74726091	+	Yes	No	6	28	0	52	0.978496	3.77171	0	6.00477
chr2:74726073-74726092_+	mmu-miR-10b-5p	chr2:74726073-74726096_+	23	19	74726073	74726092	+	Yes	No	21	135	4	178	3.42473	18.1851	0.442191	20.5548
chr2:74726073-74726093_+	mmu-miR-10b-5p	chr2:74726073-74726096_+	23	20	74726073	74726093	+	Yes	No	14	32	0	15	2.28316	4.31053	0	1.73215
chr2:74726073-74726094_+	mmu-miR-10b-5p	chr2:74726073-74726096_+	23	21	74726073	74726094	+	Yes	No	44	33	0	34	7.17563	4.44524	0	3.9262
chr2:74726073-74726095_+	mmu-miR-10b-5p	chr2:74726073-74726096_+	23	22	74726073	74726095	+	Yes	No	1721	1301	280	1483	280.665	175.25	30.9534	171.252
chr2:74726073-74726096_+	mmu-miR-10b-5p	chr2:74726073-74726096_+	23	23	74726073	74726096	+	Yes	Yes	142	45	40	32	23.1577	6.06168	4.42191	3.69525
chr2:74726073-74726097_+	mmu-miR-10b-5p	chr2:74726073-74726096_+	23	24	74726073	74726097	+	Yes	No	70	28	10	17	11.4158	3.77171	1.10548	1.9631
chr2:74726074-74726092_+	mmu-miR-10b-5p	chr2:74726073-74726096_+	23	18	74726074	74726092	+	No	No	2	21	0	17	0.326165	2.82879	0	1.9631
chr2:74726074-74726095_+	mmu-miR-10b-5p	chr2:74726073-74726096_+	23	21	74726074	74726095	+	No	No	113	167	56	93	18.4283	22.4956	6.19068	10.7393
chr2:74726074-74726096_+	mmu-miR-10b-5p	chr2:74726073-74726096_+	23	22	74726074	74726096	+	No	Yes	72	39	21	28	11.7419	5.25346	2.3215	3.23334
chr2:74726074-74726097_+	mmu-miR-10b-5p	chr2:74726073-74726096_+	23	23	74726074	74726097	+	No	No	182	67	41	79	29.681	9.02517	4.53246	9.12264
chr7:27205614-27205637_+	mmu-miR-1191a	chr7:27205614-27205635_+	21	23	27205614	27205637	+	Yes	No	1	3	20	2	0.163083	0.404112	2.21096	0.230953
chr10:81416275-81416297_-	mmu-miR-1191b-5p	chr10:81416275-81416297_-	22	22	81416297	81416275	-	Yes	Yes	9	21	11	14	1.46774	2.82879	1.21603	1.61667
chrX:7807179-7807200_+	mmu-miR-1198-3p	chrX:7807179-7807201_+	22	21	7807179	7807200	+	Yes	No	0	4	12	0	0	0.538816	1.32657	0
chrX:7807179-7807201_+	mmu-miR-1198-3p	chrX:7807179-7807201_+	22	22	7807179	7807201	+	Yes	Yes	3	5	10	0	0.489248	0.673521	1.10548	0
chrX:7807141-7807159_+	mmu-miR-1198-5p	chrX:7807141-7807163_+	22	18	7807141	7807159	+	Yes	No	10	7	2	16	1.63083	0.942929	0.221096	1.84762
chrX:7807141-7807160_+	mmu-miR-1198-5p	chrX:7807141-7807163_+	22	19	7807141	7807160	+	Yes	No	207	185	30	218	33.7581	24.9203	3.31644	25.1739
chrX:7807141-7807161_+	mmu-miR-1198-5p	chrX:7807141-7807163_+	22	20	7807141	7807161	+	Yes	No	35	127	25	114	5.70789	17.1074	2.7637	13.1643
chrX:7807141-7807162_+	mmu-miR-1198-5p	chrX:7807141-7807163_+	22	21	7807141	7807162	+	Yes	No	51	96	75	98	8.31721	12.9316	8.29109	11.3167
chrX:7807141-7807163_+	mmu-miR-1198-5p	chrX:7807141-7807163_+	22	22	7807141	7807163	+	Yes	Yes	1318	893	1649	1150	214.943	120.291	182.293	132.798
chrX:7807141-7807164_+	mmu-miR-1198-5p	chrX:7807141-7807163_+	22	23	7807141	7807164	+	Yes	No	161	225	160	230	26.2563	30.3084	17.6877	26.5596
chrX:7807141-7807165_+	mmu-miR-1198-5p	chrX:7807141-7807163_+	22	24	7807141	7807165	+	Yes	No	52	75	140	79	8.4803	10.1028	15.4767	9.12264
chrX:7807141-7807166_+	mmu-miR-1198-5p	chrX:7807141-7807163_+	22	25	7807141	7807166	+	Yes	No	34	14	48	18	5.54481	1.88586	5.3063	2.07858
chrX:7807141-7807167_+	mmu-miR-1198-5p	chrX:7807141-7807163_+	22	26	7807141	7807167	+	Yes	No	20	13	14	14	3.26165	1.75115	1.54767	1.61667
chrX:7807142-7807163_+	mmu-miR-1198-5p	chrX:7807141-7807163_+	22	21	7807142	7807163	+	No	Yes	4	7	8	8	0.65233	0.942929	0.884383	0.923811
chr8:84011591-84011613_-	mmu-miR-1199-5p	chr8:84011593-84011613_-	20	22	84011613	84011591	-	Yes	No	14	19	13	11	2.28316	2.55938	1.43712	1.27024
chr8:84011592-84011613_-	mmu-miR-1199-5p	chr8:84011593-84011613_-	20	21	84011613	84011592	-	Yes	No	10	0	0	0	1.63083	0	0	0
chr8:84011593-84011613_-	mmu-miR-1199-5p	chr8:84011593-84011613_-	20	20	84011613	84011593	-	Yes	Yes	3	7	22	15	0.489248	0.942929	2.43205	1.73215
chr11:86852601-86852624_-	mmu-miR-12182-3p	chr11:86852603-86852625_-	22	23	86852624	86852601	-	No	No	0	0	0	10	0	0	0	1.15476
chr11:86852602-86852624_-	mmu-miR-12182-3p	chr11:86852603-86852625_-	22	22	86852624	86852602	-	No	No	0	0	3	9	0	0	0.331644	1.03929
chr11:86852603-86852624_-	mmu-miR-12182-3p	chr11:86852603-86852625_-	22	21	86852624	86852603	-	No	Yes	2	11	28	46	0.326165	1.48175	3.09534	5.31192
chr11:86852603-86852625_-	mmu-miR-12182-3p	chr11:86852603-86852625_-	22	22	86852625	86852603	-	Yes	Yes	7	0	17	47	1.14158	0	1.87931	5.42739
chr17:80194910-80194932_-	mmu-miR-12189-3p	chr17:80194912-80194932_-	20	22	80194932	80194910	-	Yes	No	3	0	15	8	0.489248	0	1.65822	0.923811
chr17:80194911-80194932_-	mmu-miR-12189-3p	chr17:80194912-80194932_-	20	21	80194932	80194911	-	Yes	No	0	2	7	16	0	0.269408	0.773835	1.84762
chr17:80194912-80194932_-	mmu-miR-12189-3p	chr17:80194912-80194932_-	20	20	80194932	80194912	-	Yes	Yes	8	18	20	18	1.30466	2.42467	2.21096	2.07858
chr18:34759573-34759594_+	mmu-miR-12191-3p	chr18:34759574-34759595_+	21	21	34759573	34759594	+	No	No	0	12	0	0	0	1.61645	0	0
chr18:34759574-34759595_+	mmu-miR-12191-3p	chr18:34759574-34759595_+	21	21	34759574	34759595	+	Yes	Yes	4	8	30	34	0.65233	1.07763	3.31644	3.9262
chr18:34759584-34759605_+	mmu-miR-12191-3p	chr18:34759574-34759595_+	21	21	34759584	34759605	+	No	No	0	0	9	0	0	0	0.994931	0
chr19:6134838-6134863_-	mmu-miR-12193-5p	chr19:6134839-6134861_-	22	25	6134863	6134838	-	No	No	0	0	0	9	0	0	0	1.03929
chr5:77084513-77084537_-	mmu-miR-12199-3p	chr5:77084516-77084537_-	21	24	77084537	77084513	-	Yes	No	0	12	0	0	0	1.61645	0	0
chr5:77084515-77084536_-	mmu-miR-12199-3p	chr5:77084516-77084537_-	21	21	77084536	77084515	-	No	No	0	12	0	3	0	1.61645	0	0.346429
chr5:77084515-77084537_-	mmu-miR-12199-3p	chr5:77084516-77084537_-	21	22	77084537	77084515	-	Yes	No	18	40	0	17	2.93549	5.38816	0	1.9631
chr5:77084516-77084537_-	mmu-miR-12199-3p	chr5:77084516-77084537_-	21	21	77084537	77084516	-	Yes	Yes	13	15	0	8	2.12007	2.02056	0	0.923811
chr18:65248865-65248886_+	mmu-miR-122-5p	chr18:65248865-65248887_+	22	21	65248865	65248886	+	Yes	No	4	28	0	33	0.65233	3.77171	0	3.81072
chr7:4918008-4918030_+	mmu-miR-12202-3p	chr7:4918008-4918030_+	22	22	4918008	4918030	+	Yes	Yes	0	0	13	0	0	0	1.43712	0
chr15:84951543-84951566_-	mmu-miR-1249-3p	chr15:84951544-84951566_-	22	23	84951566	84951543	-	Yes	No	21	14	26	33	3.42473	1.88586	2.87424	3.81072
chr15:84951544-84951566_-	mmu-miR-1249-3p	chr15:84951544-84951566_-	22	22	84951566	84951544	-	Yes	Yes	240	152	216	175	39.1398	20.475	23.8783	20.2084
chr15:84951545-84951566_-	mmu-miR-1249-3p	chr15:84951544-84951566_-	22	21	84951566	84951545	-	Yes	No	132	97	84	72	21.5269	13.0663	9.28602	8.3143
chr15:84951546-84951566_-	mmu-miR-1249-3p	chr15:84951544-84951566_-	22	20	84951566	84951546	-	Yes	No	64	140	122	252	10.4373	18.8586	13.4868	29.1001
chr15:84951546-84951567_-	mmu-miR-1249-3p	chr15:84951544-84951566_-	22	21	84951567	84951546	-	No	No	0	0	6	15	0	0	0.663287	1.73215
chr15:84951547-84951566_-	mmu-miR-1249-3p	chr15:84951544-84951566_-	22	19	84951566	84951547	-	Yes	No	16	47	22	56	2.60932	6.33109	2.43205	6.46668
chr15:84951578-84951603_-	mmu-miR-1249-5p	chr15:84951578-84951603_-	25	25	84951603	84951578	-	Yes	Yes	0	2	9	0	0	0.269408	0.994931	0
chr15:84951579-84951603_-	mmu-miR-1249-5p	chr15:84951578-84951603_-	25	24	84951603	84951579	-	Yes	No	1	6	0	8	0.163083	0.808225	0	0.923811
chr17:17830854-17830874_+	mmu-miR-125a-3p	chr17:17830854-17830876_+	22	20	17830854	17830874	+	Yes	No	3	23	0	0	0.489248	3.09819	0	0
chr17:17830854-17830875_+	mmu-miR-125a-3p	chr17:17830854-17830876_+	22	21	17830854	17830875	+	Yes	No	49	44	14	0	7.99105	5.92698	1.54767	0
chr17:17830854-17830876_+	mmu-miR-125a-3p	chr17:17830854-17830876_+	22	22	17830854	17830876	+	Yes	Yes	36	36	8	15	5.87097	4.84935	0.884383	1.73215
chr17:17830854-17830877_+	mmu-miR-125a-3p	chr17:17830854-17830876_+	22	23	17830854	17830877	+	Yes	No	10	1	0	0	1.63083	0.134704	0	0
chr17:17830855-17830875_+	mmu-miR-125a-3p	chr17:17830854-17830876_+	22	20	17830855	17830875	+	No	No	9	6	0	4	1.46774	0.808225	0	0.461906
chr17:17830816-17830835_+	mmu-miR-125a-5p	chr17:17830816-17830840_+	24	19	17830816	17830835	+	Yes	No	191	114	9	19	31.1488	15.3563	0.994931	2.19405
chr17:17830816-17830836_+	mmu-miR-125a-5p	chr17:17830816-17830840_+	24	20	17830816	17830836	+	Yes	No	23	17	4	2	3.7509	2.28997	0.442191	0.230953
chr17:17830816-17830837_+	mmu-miR-125a-5p	chr17:17830816-17830840_+	24	21	17830816	17830837	+	Yes	No	425	273	50	67	69.3101	36.7742	5.52739	7.73692
chr17:17830816-17830838_+	mmu-miR-125a-5p	chr17:17830816-17830840_+	24	22	17830816	17830838	+	Yes	No	1690	1007	545	481	275.61	135.647	60.2486	55.5442
chr17:17830816-17830839_+	mmu-miR-125a-5p	chr17:17830816-17830840_+	24	23	17830816	17830839	+	Yes	No	1126	688	523	230	183.631	92.6764	57.8165	26.5596
chr17:17830816-17830840_+	mmu-miR-125a-5p	chr17:17830816-17830840_+	24	24	17830816	17830840	+	Yes	Yes	8340	5530	2154	872	1360.11	744.914	238.12	100.695
chr17:17830816-17830841_+	mmu-miR-125a-5p	chr17:17830816-17830840_+	24	25	17830816	17830841	+	Yes	No	390	262	143	43	63.6022	35.2925	15.8083	4.96549
chr17:17830816-17830842_+	mmu-miR-125a-5p	chr17:17830816-17830840_+	24	26	17830816	17830842	+	Yes	No	38	26	21	0	6.19714	3.50231	2.3215	0
chr17:17830817-17830840_+	mmu-miR-125a-5p	chr17:17830816-17830840_+	24	23	17830817	17830840	+	No	Yes	24	4	15	0	3.91398	0.538816	1.65822	0
chr17:17830818-17830838_+	mmu-miR-125a-5p	chr17:17830816-17830840_+	24	20	17830818	17830838	+	No	No	26	19	9	7	4.24015	2.55938	0.994931	0.808335
chr17:17830818-17830839_+	mmu-miR-125a-5p	chr17:17830816-17830840_+	24	21	17830818	17830839	+	No	No	7	13	9	2	1.14158	1.75115	0.994931	0.230953
chr17:17830818-17830840_+	mmu-miR-125a-5p	chr17:17830816-17830840_+	24	22	17830818	17830840	+	No	Yes	117	61	26	18	19.0807	8.21695	2.87424	2.07858
chr17:17830818-17830841_+	mmu-miR-125a-5p	chr17:17830816-17830840_+	24	23	17830818	17830841	+	No	No	11	1	6	0	1.79391	0.134704	0.663287	0
chr17:17830819-17830838_+	mmu-miR-125a-5p	chr17:17830816-17830840_+	24	19	17830819	17830838	+	No	No	8	9	0	0	1.30466	1.21234	0	0
chr17:17830819-17830839_+	mmu-miR-125a-5p	chr17:17830816-17830840_+	24	20	17830819	17830839	+	No	No	10	0	0	0	1.63083	0	0	0
chr17:17830820-17830839_+	mmu-miR-125a-5p	chr17:17830816-17830840_+	24	19	17830820	17830839	+	No	No	15	14	1	4	2.44624	1.88586	0.110548	0.461906
chr16:77646314-77646338_+	mmu-miR-125b-2-3p	chr16:77646317-77646339_+	22	24	77646314	77646338	+	No	No	0	0	9	0	0	0	0.994931	0
chr16:77646315-77646337_+	mmu-miR-125b-2-3p	chr16:77646317-77646339_+	22	22	77646315	77646337	+	No	No	3	10	8	0	0.489248	1.34704	0.884383	0
chr16:77646315-77646338_+	mmu-miR-125b-2-3p	chr16:77646317-77646339_+	22	23	77646315	77646338	+	No	No	9	1	3	0	1.46774	0.134704	0.331644	0
chr16:77646317-77646337_+	mmu-miR-125b-2-3p	chr16:77646317-77646339_+	22	20	77646317	77646337	+	Yes	No	11	5	8	0	1.79391	0.673521	0.884383	0
chr16:77646317-77646338_+	mmu-miR-125b-2-3p	chr16:77646317-77646339_+	22	21	77646317	77646338	+	Yes	No	10	12	42	11	1.63083	1.61645	4.64301	1.27024
chr16:77646317-77646339_+	mmu-miR-125b-2-3p	chr16:77646317-77646339_+	22	22	77646317	77646339	+	Yes	Yes	12	7	0	0	1.95699	0.942929	0	0
chr9:41581939-41581960_+	mmu-miR-125b-5p	chr9:41581939-41581961_+	22	21	41581939	41581960	+	Yes	No	6	6	10	5	0.978496	0.808225	1.10548	0.577382
chr9:41581939-41581961_+	mmu-miR-125b-5p	chr9:41581939-41581961_+	22	22	41581939	41581961	+	Yes	Yes	36	24	15	12	5.87097	3.2329	1.65822	1.38572
chr2:26591401-26591423_+	mmu-miR-126a-3p	chr2:26591401-26591423_+	22	22	26591401	26591423	+	Yes	Yes	34	50	12	5	5.54481	6.73521	1.32657	0.577382
chr2:26591402-26591423_+	mmu-miR-126a-3p	chr2:26591401-26591423_+	22	21	26591402	26591423	+	No	Yes	12	13	29	0	1.95699	1.75115	3.20589	0
chr2:26591364-26591385_+	mmu-miR-126a-5p	chr2:26591364-26591385_+	21	21	26591364	26591385	+	Yes	Yes	61	48	43	21	9.94804	6.4658	4.75356	2.42501
chr12:109592887-109592907_+	mmu-miR-127-3p	chr12:109592887-109592909_+	22	20	109592887	109592907	+	Yes	No	23	218	11	139	3.7509	29.3655	1.21603	16.0512
chr12:109592887-109592908_+	mmu-miR-127-3p	chr12:109592887-109592909_+	22	21	109592887	109592908	+	Yes	No	19	17	5	0	3.09857	2.28997	0.552739	0
chr12:109592887-109592909_+	mmu-miR-127-3p	chr12:109592887-109592909_+	22	22	109592887	109592909	+	Yes	Yes	31	23	17	22	5.05556	3.09819	1.87931	2.54048
chr12:109592887-109592910_+	mmu-miR-127-3p	chr12:109592887-109592909_+	22	23	109592887	109592910	+	Yes	No	25	26	0	0	4.07706	3.50231	0	0
chr12:109592887-109592911_+	mmu-miR-127-3p	chr12:109592887-109592909_+	22	24	109592887	109592911	+	Yes	No	4	0	0	14	0.65233	0	0	1.61667
chr1:128202368-128202388_+	mmu-miR-128-1-5p	chr1:128202368-128202389_+	21	20	128202368	128202388	+	Yes	No	5	9	5	11	0.815413	1.21234	0.552739	1.27024
chr1:128202368-128202389_+	mmu-miR-128-1-5p	chr1:128202368-128202389_+	21	21	128202368	128202389	+	Yes	Yes	36	54	41	30	5.87097	7.27402	4.53246	3.46429
chr1:128202368-128202390_+	mmu-miR-128-1-5p	chr1:128202368-128202389_+	21	22	128202368	128202390	+	Yes	No	11	17	7	9	1.79391	2.28997	0.773835	1.03929
chr1:128202368-128202391_+	mmu-miR-128-1-5p	chr1:128202368-128202389_+	21	23	128202368	128202391	+	Yes	No	36	38	77	20	5.87097	5.11876	8.51218	2.30953
chr1:128202369-128202392_+	mmu-miR-128-1-5p	chr1:128202368-128202389_+	21	23	128202369	128202392	+	No	No	8	0	0	0	1.30466	0	0	0
chr9:112118641-112118664_-	mmu-miR-128-3p	chr9:112118643-112118664_-	21	23	112118664	112118641	-	Yes	No	21	21	36	21	3.42473	2.82879	3.97972	2.42501
chr9:112118642-112118664_-	mmu-miR-128-3p	chr9:112118643-112118664_-	21	22	112118664	112118642	-	Yes	No	26	40	62	39	4.24015	5.38816	6.85397	4.50358
chr9:112118643-112118663_-	mmu-miR-128-3p	chr9:112118643-112118664_-	21	20	112118663	112118643	-	No	Yes	7	3	2	9	1.14158	0.404112	0.221096	1.03929
chr9:112118643-112118664_-	mmu-miR-128-3p	chr9:112118643-112118664_-	21	21	112118664	112118643	-	Yes	Yes	223	287	267	270	36.3674	38.6601	29.5163	31.1786
chr9:112118644-112118663_-	mmu-miR-128-3p	chr9:112118643-112118664_-	21	19	112118663	112118644	-	No	No	0	1	0	13	0	0.134704	0	1.50119
chr9:112118644-112118664_-	mmu-miR-128-3p	chr9:112118643-112118664_-	21	20	112118664	112118644	-	Yes	No	25	83	45	88	4.07706	11.1804	4.97465	10.1619
chr9:112118645-112118664_-	mmu-miR-128-3p	chr9:112118643-112118664_-	21	19	112118664	112118645	-	Yes	No	4	23	12	27	0.65233	3.09819	1.32657	3.11786
chr9:112118646-112118664_-	mmu-miR-128-3p	chr9:112118643-112118664_-	21	18	112118664	112118646	-	Yes	No	0	4	2	15	0	0.538816	0.221096	1.73215
chr2:94241377-94241397_-	mmu-miR-129-2-3p	chr2:94241375-94241397_-	22	20	94241397	94241377	-	Yes	No	0	0	9	0	0	0	0.994931	0
chr6:29022623-29022641_+	mmu-miR-129-5p	chr6:29022623-29022644_+	21	18	29022623	29022641	+	Yes	No	0	9	0	2	0	1.21234	0	0.230953
chr6:29022623-29022643_+	mmu-miR-129-5p	chr6:29022623-29022644_+	21	20	29022623	29022643	+	Yes	No	0	22	5	9	0	2.96349	0.552739	1.03929
chr6:29022623-29022644_+	mmu-miR-129-5p	chr6:29022623-29022644_+	21	21	29022623	29022644	+	Yes	Yes	13	61	31	42	2.12007	8.21695	3.42698	4.85001
chr6:29022623-29022645_+	mmu-miR-129-5p	chr6:29022623-29022644_+	21	22	29022623	29022645	+	Yes	No	0	10	0	11	0	1.34704	0	1.27024
chr2:94241377-94241397_+	mmu-miR-129b-5p	chr2:94241377-94241399_+	22	20	94241377	94241397	+	Yes	No	0	8	0	0	0	1.07763	0	0
chr16:18284242-18284265_-	mmu-miR-1306-3p	chr16:18284247-18284268_-	21	23	18284265	18284242	-	No	No	0	9	0	0	0	1.21234	0	0
chr16:18284246-18284268_-	mmu-miR-1306-3p	chr16:18284247-18284268_-	21	22	18284268	18284246	-	Yes	No	24	16	4	7	3.91398	2.15527	0.442191	0.808335
chr16:18284247-18284268_-	mmu-miR-1306-3p	chr16:18284247-18284268_-	21	21	18284268	18284247	-	Yes	Yes	5	4	29	5	0.815413	0.538816	3.20589	0.577382
chr16:18284247-18284269_-	mmu-miR-1306-3p	chr16:18284247-18284268_-	21	22	18284269	18284247	-	No	Yes	12	2	12	6	1.95699	0.269408	1.32657	0.692859
chr16:18284248-18284269_-	mmu-miR-1306-3p	chr16:18284247-18284268_-	21	21	18284269	18284248	-	No	No	4	10	7	2	0.65233	1.34704	0.773835	0.230953
chr16:18284248-18284271_-	mmu-miR-1306-3p	chr16:18284247-18284268_-	21	23	18284271	18284248	-	No	No	0	0	11	2	0	0	1.21603	0.230953
chr16:18284249-18284271_-	mmu-miR-1306-3p	chr16:18284247-18284268_-	21	22	18284271	18284249	-	No	No	8	5	11	10	1.30466	0.673521	1.21603	1.15476
chr16:18284286-18284308_-	mmu-miR-1306-5p	chr16:18284287-18284310_-	23	22	18284308	18284286	-	No	No	5	11	0	0	0.815413	1.48175	0	0
chr16:18284287-18284308_-	mmu-miR-1306-5p	chr16:18284287-18284310_-	23	21	18284308	18284287	-	No	Yes	19	19	21	17	3.09857	2.55938	2.3215	1.9631
chr16:18284288-18284308_-	mmu-miR-1306-5p	chr16:18284287-18284310_-	23	20	18284308	18284288	-	No	No	0	3	0	13	0	0.404112	0	1.50119
chr2:84741117-84741137_-	mmu-miR-130a-3p	chr2:84741115-84741137_-	22	20	84741137	84741117	-	Yes	No	21	21	3	6	3.42473	2.82879	0.331644	0.692859
chr16:17124067-17124092_-	mmu-miR-130b-3p	chr16:17124070-17124092_-	22	25	17124092	17124067	-	Yes	No	0	0	5	8	0	0	0.552739	0.923811
chr16:17124068-17124092_-	mmu-miR-130b-3p	chr16:17124070-17124092_-	22	24	17124092	17124068	-	Yes	No	6	12	10	37	0.978496	1.61645	1.10548	4.27263
chr16:17124069-17124091_-	mmu-miR-130b-3p	chr16:17124070-17124092_-	22	22	17124091	17124069	-	No	No	42	22	35	56	6.84947	2.96349	3.86917	6.46668
chr16:17124069-17124092_-	mmu-miR-130b-3p	chr16:17124070-17124092_-	22	23	17124092	17124069	-	Yes	No	600	583	1107	848	97.8496	78.5325	122.376	97.924
chr16:17124070-17124091_-	mmu-miR-130b-3p	chr16:17124070-17124092_-	22	21	17124091	17124070	-	No	Yes	20	39	46	36	3.26165	5.25346	5.0852	4.15715
chr16:17124070-17124092_-	mmu-miR-130b-3p	chr16:17124070-17124092_-	22	22	17124092	17124070	-	Yes	Yes	308	378	464	314	50.2294	50.9182	51.2942	36.2596
chr16:17124071-17124091_-	mmu-miR-130b-3p	chr16:17124070-17124092_-	22	20	17124091	17124071	-	No	No	2	3	7	9	0.326165	0.404112	0.773835	1.03929
chr16:17124071-17124092_-	mmu-miR-130b-3p	chr16:17124070-17124092_-	22	21	17124092	17124071	-	Yes	No	117	159	86	247	19.0807	21.418	9.50712	28.5227
chr16:17124072-17124091_-	mmu-miR-130b-3p	chr16:17124070-17124092_-	22	19	17124091	17124072	-	No	No	15	10	15	26	2.44624	1.34704	1.65822	3.00239
chr16:17124072-17124092_-	mmu-miR-130b-3p	chr16:17124070-17124092_-	22	20	17124092	17124072	-	Yes	No	501	660	941	717	81.7044	88.9047	104.026	82.7966
chr16:17124072-17124093_-	mmu-miR-130b-3p	chr16:17124070-17124092_-	22	21	17124093	17124072	-	No	No	0	0	16	0	0	0	1.76877	0
chr16:17124073-17124092_-	mmu-miR-130b-3p	chr16:17124070-17124092_-	22	19	17124092	17124073	-	Yes	No	13	1	13	0	2.12007	0.134704	1.43712	0
chr16:17124107-17124130_-	mmu-miR-130b-5p	chr16:17124108-17124130_-	22	23	17124130	17124107	-	Yes	No	21	21	65	18	3.42473	2.82879	7.18561	2.07858
chr16:17124108-17124130_-	mmu-miR-130b-5p	chr16:17124108-17124130_-	22	22	17124130	17124108	-	Yes	Yes	505	500	762	576	82.3567	67.3521	84.2375	66.5144
chr16:17124109-17124130_-	mmu-miR-130b-5p	chr16:17124108-17124130_-	22	21	17124130	17124109	-	Yes	No	60	83	75	121	9.78496	11.1804	8.29109	13.9726
chr16:17124109-17124131_-	mmu-miR-130b-5p	chr16:17124108-17124130_-	22	22	17124131	17124109	-	No	No	9	9	10	9	1.46774	1.21234	1.10548	1.03929
chr16:17124110-17124130_-	mmu-miR-130b-5p	chr16:17124108-17124130_-	22	20	17124130	17124110	-	Yes	No	22	22	29	51	3.58782	2.96349	3.20589	5.8893
chr16:17124110-17124131_-	mmu-miR-130b-5p	chr16:17124108-17124130_-	22	21	17124131	17124110	-	No	No	18	8	0	38	2.93549	1.07763	0	4.3881
chr16:17124111-17124130_-	mmu-miR-130b-5p	chr16:17124108-17124130_-	22	19	17124130	17124111	-	Yes	No	9	22	22	21	1.46774	2.96349	2.43205	2.42501
chr16:17124111-17124131_-	mmu-miR-130b-5p	chr16:17124108-17124130_-	22	20	17124131	17124111	-	No	No	1	11	4	8	0.163083	1.48175	0.442191	0.923811
chr16:17124112-17124130_-	mmu-miR-130b-5p	chr16:17124108-17124130_-	22	18	17124130	17124112	-	Yes	No	3	4	0	13	0.489248	0.538816	0	1.50119
chr11:75173722-75173742_+	mmu-miR-132-3p	chr11:75173722-75173744_+	22	20	75173722	75173742	+	Yes	No	12	30	13	72	1.95699	4.04112	1.43712	8.3143
chr11:75173722-75173743_+	mmu-miR-132-3p	chr11:75173722-75173744_+	22	21	75173722	75173743	+	Yes	No	21	137	92	146	3.42473	18.4545	10.1704	16.8596
chr11:75173722-75173744_+	mmu-miR-132-3p	chr11:75173722-75173744_+	22	22	75173722	75173744	+	Yes	Yes	865	2361	1786	2317	141.066	318.036	197.438	267.559
chr11:75173722-75173745_+	mmu-miR-132-3p	chr11:75173722-75173744_+	22	23	75173722	75173745	+	Yes	No	1000	2321	2266	3399	163.083	312.648	250.501	392.504
chr11:75173722-75173746_+	mmu-miR-132-3p	chr11:75173722-75173744_+	22	24	75173722	75173746	+	Yes	No	25	117	68	92	4.07706	15.7604	7.51725	10.6238
chr11:75173723-75173743_+	mmu-miR-132-3p	chr11:75173722-75173744_+	22	20	75173723	75173743	+	No	No	0	5	0	8	0	0.673521	0	0.923811
chr11:75173723-75173744_+	mmu-miR-132-3p	chr11:75173722-75173744_+	22	21	75173723	75173744	+	No	Yes	10	62	52	61	1.63083	8.35165	5.74849	7.04406
chr11:75173723-75173745_+	mmu-miR-132-3p	chr11:75173722-75173744_+	22	22	75173723	75173745	+	No	No	9	37	44	76	1.46774	4.98405	4.86411	8.77621
chr11:75173724-75173745_+	mmu-miR-132-3p	chr11:75173722-75173744_+	22	21	75173724	75173745	+	No	No	36	59	85	91	5.87097	7.94754	9.39657	10.5084
chr11:75173724-75173746_+	mmu-miR-132-3p	chr11:75173722-75173744_+	22	22	75173724	75173746	+	No	No	0	2	14	6	0	0.269408	1.54767	0.692859
chr11:75173685-75173708_+	mmu-miR-132-5p	chr11:75173685-75173707_+	22	23	75173685	75173708	+	Yes	No	2	9	12	2	0.326165	1.21234	1.32657	0.230953
chr11:75173686-75173705_+	mmu-miR-132-5p	chr11:75173685-75173707_+	22	19	75173686	75173705	+	No	No	0	0	0	9	0	0	0	1.03929
chr11:75173686-75173707_+	mmu-miR-132-5p	chr11:75173685-75173707_+	22	21	75173686	75173707	+	No	Yes	9	23	22	15	1.46774	3.09819	2.43205	1.73215
chr11:75173686-75173708_+	mmu-miR-132-5p	chr11:75173685-75173707_+	22	22	75173686	75173708	+	No	No	57	278	194	197	9.29571	37.4477	21.4463	22.7489
chr9:106154177-106154198_+	mmu-miR-135a-1-3p	chr9:106154178-106154200_+	22	21	106154177	106154198	+	No	No	9	14	21	0	1.46774	1.88586	2.3215	0
chr9:106154177-106154199_+	mmu-miR-135a-1-3p	chr9:106154178-106154200_+	22	22	106154177	106154199	+	No	No	113	8	47	12	18.4283	1.07763	5.19575	1.38572
chr9:106154177-106154200_+	mmu-miR-135a-1-3p	chr9:106154178-106154200_+	22	23	106154177	106154200	+	No	Yes	19	7	6	6	3.09857	0.942929	0.663287	0.692859
chr9:106154177-106154201_+	mmu-miR-135a-1-3p	chr9:106154178-106154200_+	22	24	106154177	106154201	+	No	No	9	10	9	0	1.46774	1.34704	0.994931	0
chr9:106154178-106154197_+	mmu-miR-135a-1-3p	chr9:106154178-106154200_+	22	19	106154178	106154197	+	Yes	No	0	8	0	0	0	1.07763	0	0
chr9:106154178-106154198_+	mmu-miR-135a-1-3p	chr9:106154178-106154200_+	22	20	106154178	106154198	+	Yes	No	17	8	17	4	2.7724	1.07763	1.87931	0.461906
chr9:106154178-106154199_+	mmu-miR-135a-1-3p	chr9:106154178-106154200_+	22	21	106154178	106154199	+	Yes	No	28	13	40	0	4.56631	1.75115	4.42191	0
chr9:106154178-106154200_+	mmu-miR-135a-1-3p	chr9:106154178-106154200_+	22	22	106154178	106154200	+	Yes	Yes	11	11	47	1	1.79391	1.48175	5.19575	0.115476
chr9:106154178-106154201_+	mmu-miR-135a-1-3p	chr9:106154178-106154200_+	22	23	106154178	106154201	+	Yes	No	31	9	30	5	5.05556	1.21234	3.31644	0.577382
chr9:106154178-106154202_+	mmu-miR-135a-1-3p	chr9:106154178-106154200_+	22	24	106154178	106154202	+	Yes	No	13	11	11	1	2.12007	1.48175	1.21603	0.115476
chr10:92072140-92072163_-	mmu-miR-135a-5p	chr10:92072140-92072163_-	23	23	92072163	92072140	-	Yes	Yes	24	16	34	1	3.91398	2.15527	3.75863	0.115476
chr9:122682935-122682957_+	mmu-miR-138-1-3p	chr9:122682935-122682957_+	22	22	122682935	122682957	+	Yes	Yes	3	0	15	0	0.489248	0	1.65822	0
chr9:122682935-122682958_+	mmu-miR-138-1-3p	chr9:122682935-122682957_+	22	23	122682935	122682958	+	Yes	No	7	0	26	21	1.14158	0	2.87424	2.42501
chr9:122682937-122682958_+	mmu-miR-138-1-3p	chr9:122682935-122682957_+	22	21	122682937	122682958	+	No	No	50	30	54	85	8.15413	4.04112	5.96958	9.8155
chr8:94324311-94324330_+	mmu-miR-138-5p	chr8:94324311-94324334_+	23	19	94324311	94324330	+	Yes	No	0	0	4	10	0	0	0.442191	1.15476
chr8:94324311-94324332_+	mmu-miR-138-5p	chr8:94324311-94324334_+	23	21	94324311	94324332	+	Yes	No	5	3	12	18	0.815413	0.404112	1.32657	2.07858
chr8:94324311-94324333_+	mmu-miR-138-5p	chr8:94324311-94324334_+	23	22	94324311	94324333	+	Yes	No	8	12	15	8	1.30466	1.61645	1.65822	0.923811
chr8:94324311-94324334_+	mmu-miR-138-5p	chr8:94324311-94324334_+	23	23	94324311	94324334	+	Yes	Yes	40	33	93	37	6.5233	4.44524	10.281	4.27263
chr8:94324311-94324335_+	mmu-miR-138-5p	chr8:94324311-94324334_+	23	24	94324311	94324335	+	Yes	No	10	0	25	7	1.63083	0	2.7637	0.808335
chr8:94324311-94324337_+	mmu-miR-138-5p	chr8:94324311-94324334_+	23	26	94324311	94324337	+	Yes	No	13	17	23	44	2.12007	2.28997	2.5426	5.08096
chr7:101475401-101475420_+	mmu-miR-139-3p	chr7:101475417-101475439_+	22	19	101475401	101475420	+	No	No	12	0	16	10	1.95699	0	1.76877	1.15476
chr7:101475417-101475437_+	mmu-miR-139-3p	chr7:101475417-101475439_+	22	20	101475417	101475437	+	Yes	No	0	3	7	10	0	0.404112	0.773835	1.15476
chr7:101475417-101475438_+	mmu-miR-139-3p	chr7:101475417-101475439_+	22	21	101475417	101475438	+	Yes	No	9	17	15	19	1.46774	2.28997	1.65822	2.19405
chr7:101475417-101475439_+	mmu-miR-139-3p	chr7:101475417-101475439_+	22	22	101475417	101475439	+	Yes	Yes	28	31	65	52	4.56631	4.17583	7.18561	6.00477
chr7:101475417-101475440_+	mmu-miR-139-3p	chr7:101475417-101475439_+	22	23	101475417	101475440	+	Yes	No	63	42	257	160	10.2742	5.65757	28.4108	18.4762
chr7:101475417-101475441_+	mmu-miR-139-3p	chr7:101475417-101475439_+	22	24	101475417	101475441	+	Yes	No	1	1	11	9	0.163083	0.134704	1.21603	1.03929
chr7:101475418-101475440_+	mmu-miR-139-3p	chr7:101475417-101475439_+	22	22	101475418	101475440	+	No	No	4	0	14	11	0.65233	0	1.54767	1.27024
chr7:101475381-101475399_+	mmu-miR-139-5p	chr7:101475381-101475403_+	22	18	101475381	101475399	+	Yes	No	3	18	3	11	0.489248	2.42467	0.331644	1.27024
chr7:101475381-101475400_+	mmu-miR-139-5p	chr7:101475381-101475403_+	22	19	101475381	101475400	+	Yes	No	18	53	29	26	2.93549	7.13932	3.20589	3.00239
chr7:101475381-101475401_+	mmu-miR-139-5p	chr7:101475381-101475403_+	22	20	101475381	101475401	+	Yes	No	68	44	100	58	11.0896	5.92698	11.0548	6.69763
chr7:101475381-101475402_+	mmu-miR-139-5p	chr7:101475381-101475403_+	22	21	101475381	101475402	+	Yes	No	71	75	153	97	11.5789	10.1028	16.9138	11.2012
chr7:101475381-101475403_+	mmu-miR-139-5p	chr7:101475381-101475403_+	22	22	101475381	101475403	+	Yes	Yes	127	151	217	214	20.7115	20.3403	23.9889	24.712
chr7:101475381-101475404_+	mmu-miR-139-5p	chr7:101475381-101475403_+	22	23	101475381	101475404	+	Yes	No	373	300	899	374	60.8298	40.4112	99.3825	43.1882
chr7:101475381-101475405_+	mmu-miR-139-5p	chr7:101475381-101475403_+	22	24	101475381	101475405	+	Yes	No	18	19	38	19	2.93549	2.55938	4.20082	2.19405
chr7:101475381-101475406_+	mmu-miR-139-5p	chr7:101475381-101475403_+	22	25	101475381	101475406	+	Yes	No	5	22	35	3	0.815413	2.96349	3.86917	0.346429
chr7:101475382-101475403_+	mmu-miR-139-5p	chr7:101475381-101475403_+	22	21	101475382	101475403	+	No	Yes	3	10	0	1	0.489248	1.34704	0	0.115476
chr7:101475382-101475404_+	mmu-miR-139-5p	chr7:101475381-101475403_+	22	22	101475382	101475404	+	No	No	12	6	21	2	1.95699	0.808225	2.3215	0.230953
chr8:107551269-107551289_+	mmu-miR-140-3p	chr8:107551287-107551308_+	21	20	107551269	107551289	+	No	No	0	8	0	0	0	1.07763	0	0
chr8:107551286-107551310_+	mmu-miR-140-3p	chr8:107551287-107551308_+	21	24	107551286	107551310	+	No	No	6	8	16	2	0.978496	1.07763	1.76877	0.230953
chr8:107551286-107551311_+	mmu-miR-140-3p	chr8:107551287-107551308_+	21	25	107551286	107551311	+	No	No	9	12	1	12	1.46774	1.61645	0.110548	1.38572
chr8:107551287-107551305_+	mmu-miR-140-3p	chr8:107551287-107551308_+	21	18	107551287	107551305	+	Yes	No	161	243	11	267	26.2563	32.7331	1.21603	30.8322
chr8:107551287-107551306_+	mmu-miR-140-3p	chr8:107551287-107551308_+	21	19	107551287	107551306	+	Yes	No	11	21	7	23	1.79391	2.82879	0.773835	2.65596
chr8:107551287-107551307_+	mmu-miR-140-3p	chr8:107551287-107551308_+	21	20	107551287	107551307	+	Yes	No	542	951	745	916	88.3908	128.104	82.3582	105.776
chr8:107551287-107551308_+	mmu-miR-140-3p	chr8:107551287-107551308_+	21	21	107551287	107551308	+	Yes	Yes	2879	4311	3973	4370	469.515	580.709	439.207	504.632
chr8:107551287-107551309_+	mmu-miR-140-3p	chr8:107551287-107551308_+	21	22	107551287	107551309	+	Yes	No	5045	7657	6522	7338	822.752	1031.43	720.993	847.366
chr8:107551287-107551310_+	mmu-miR-140-3p	chr8:107551287-107551308_+	21	23	107551287	107551310	+	Yes	No	10027	8225	12489	6879	1635.23	1107.94	1380.63	794.362
chr8:107551287-107551311_+	mmu-miR-140-3p	chr8:107551287-107551308_+	21	24	107551287	107551311	+	Yes	No	14341	15430	22542	12673	2338.77	2078.48	2491.97	1463.43
chr8:107551287-107551312_+	mmu-miR-140-3p	chr8:107551287-107551308_+	21	25	107551287	107551312	+	Yes	No	197	167	322	159	32.1273	22.4956	35.5964	18.3608
chr8:107551287-107551313_+	mmu-miR-140-3p	chr8:107551287-107551308_+	21	26	107551287	107551313	+	Yes	No	35	26	69	33	5.70789	3.50231	7.6278	3.81072
chr8:107551287-107551314_+	mmu-miR-140-3p	chr8:107551287-107551308_+	21	27	107551287	107551314	+	Yes	No	2	0	18	3	0.326165	0	1.98986	0.346429
chr8:107551288-107551306_+	mmu-miR-140-3p	chr8:107551287-107551308_+	21	18	107551288	107551306	+	No	No	7	3	2	21	1.14158	0.404112	0.221096	2.42501
chr8:107551288-107551307_+	mmu-miR-140-3p	chr8:107551287-107551308_+	21	19	107551288	107551307	+	No	No	219	449	280	423	35.7151	60.4821	30.9534	48.8465
chr8:107551288-107551308_+	mmu-miR-140-3p	chr8:107551287-107551308_+	21	20	107551288	107551308	+	No	Yes	1421	1395	1691	1404	231.74	187.912	186.936	162.129
chr8:107551288-107551309_+	mmu-miR-140-3p	chr8:107551287-107551308_+	21	21	107551288	107551309	+	No	No	3623	3771	3983	3000	590.848	507.969	440.312	346.429
chr8:107551288-107551310_+	mmu-miR-140-3p	chr8:107551287-107551308_+	21	22	107551288	107551310	+	No	No	14754	10524	18663	7318	2406.12	1417.63	2063.15	845.057
chr8:107551288-107551311_+	mmu-miR-140-3p	chr8:107551287-107551308_+	21	23	107551288	107551311	+	No	No	15260	16147	21133	12196	2488.64	2175.07	2336.21	1408.35
chr8:107551288-107551312_+	mmu-miR-140-3p	chr8:107551287-107551308_+	21	24	107551288	107551312	+	No	No	332	427	571	390	54.1434	57.5187	63.1228	45.0358
chr8:107551288-107551313_+	mmu-miR-140-3p	chr8:107551287-107551308_+	21	25	107551288	107551313	+	No	No	119	99	313	251	19.4068	13.3357	34.6015	28.9846
chr8:107551288-107551314_+	mmu-miR-140-3p	chr8:107551287-107551308_+	21	26	107551288	107551314	+	No	No	20	17	39	23	3.26165	2.28997	4.31137	2.65596
chr8:107551289-107551307_+	mmu-miR-140-3p	chr8:107551287-107551308_+	21	18	107551289	107551307	+	No	No	17	7	0	18	2.7724	0.942929	0	2.07858
chr8:107551289-107551308_+	mmu-miR-140-3p	chr8:107551287-107551308_+	21	19	107551289	107551308	+	No	Yes	37	42	43	44	6.03406	5.65757	4.75356	5.08096
chr8:107551289-107551309_+	mmu-miR-140-3p	chr8:107551287-107551308_+	21	20	107551289	107551309	+	No	No	148	192	150	106	24.1362	25.8632	16.5822	12.2405
chr8:107551289-107551310_+	mmu-miR-140-3p	chr8:107551287-107551308_+	21	21	107551289	107551310	+	No	No	737	456	894	411	120.192	61.4251	98.8298	47.4608
chr8:107551289-107551311_+	mmu-miR-140-3p	chr8:107551287-107551308_+	21	22	107551289	107551311	+	No	No	2395	2449	3980	1720	390.583	329.89	439.98	198.619
chr8:107551289-107551312_+	mmu-miR-140-3p	chr8:107551287-107551308_+	21	23	107551289	107551312	+	No	No	64	41	52	36	10.4373	5.52287	5.74849	4.15715
chr8:107551289-107551313_+	mmu-miR-140-3p	chr8:107551287-107551308_+	21	24	107551289	107551313	+	No	No	18	10	29	9	2.93549	1.34704	3.20589	1.03929
chr8:107551290-107551308_+	mmu-miR-140-3p	chr8:107551287-107551308_+	21	18	107551290	107551308	+	No	Yes	10	8	9	14	1.63083	1.07763	0.994931	1.61667
chr8:107551290-107551309_+	mmu-miR-140-3p	chr8:107551287-107551308_+	21	19	107551290	107551309	+	No	No	12	19	27	13	1.95699	2.55938	2.98479	1.50119
chr8:107551290-107551310_+	mmu-miR-140-3p	chr8:107551287-107551308_+	21	20	107551290	107551310	+	No	No	20	46	55	35	3.26165	6.19639	6.08013	4.04168
chr8:107551290-107551311_+	mmu-miR-140-3p	chr8:107551287-107551308_+	21	21	107551290	107551311	+	No	No	155	125	250	95	25.2778	16.838	27.637	10.9703
chr8:107551290-107551312_+	mmu-miR-140-3p	chr8:107551287-107551308_+	21	22	107551290	107551312	+	No	No	10	4	18	21	1.63083	0.538816	1.98986	2.42501
chr8:107551290-107551313_+	mmu-miR-140-3p	chr8:107551287-107551308_+	21	23	107551290	107551313	+	No	No	4	19	7	8	0.65233	2.55938	0.773835	0.923811
chr8:107551291-107551310_+	mmu-miR-140-3p	chr8:107551287-107551308_+	21	19	107551291	107551310	+	No	No	6	6	16	17	0.978496	0.808225	1.76877	1.9631
chr8:107551291-107551311_+	mmu-miR-140-3p	chr8:107551287-107551308_+	21	20	107551291	107551311	+	No	No	23	12	20	14	3.7509	1.61645	2.21096	1.61667
chr8:107551291-107551312_+	mmu-miR-140-3p	chr8:107551287-107551308_+	21	21	107551291	107551312	+	No	No	0	14	0	4	0	1.88586	0	0.461906
chr8:107551291-107551313_+	mmu-miR-140-3p	chr8:107551287-107551308_+	21	22	107551291	107551313	+	No	No	3	3	3	8	0.489248	0.404112	0.331644	0.923811
chr8:107551248-107551267_+	mmu-miR-140-5p	chr8:107551248-107551270_+	22	19	107551248	107551267	+	Yes	No	93	110	0	101	15.1667	14.8175	0	11.6631
chr8:107551248-107551268_+	mmu-miR-140-5p	chr8:107551248-107551270_+	22	20	107551248	107551268	+	Yes	No	17	6	4	12	2.7724	0.808225	0.442191	1.38572
chr8:107551248-107551269_+	mmu-miR-140-5p	chr8:107551248-107551270_+	22	21	107551248	107551269	+	Yes	No	16	2	7	5	2.60932	0.269408	0.773835	0.577382
chr8:107551248-107551270_+	mmu-miR-140-5p	chr8:107551248-107551270_+	22	22	107551248	107551270	+	Yes	Yes	480	335	480	270	78.2796	45.1259	53.063	31.1786
chr8:107551248-107551271_+	mmu-miR-140-5p	chr8:107551248-107551270_+	22	23	107551248	107551271	+	Yes	No	50	39	51	29	8.15413	5.25346	5.63794	3.34882
chr8:107551249-107551270_+	mmu-miR-140-5p	chr8:107551248-107551270_+	22	21	107551249	107551270	+	No	Yes	29	7	17	13	4.7294	0.942929	1.87931	1.50119
chr8:107551249-107551271_+	mmu-miR-140-5p	chr8:107551248-107551270_+	22	22	107551249	107551271	+	No	No	12	16	20	5	1.95699	2.15527	2.21096	0.577382
chr6:124717914-124717938_-	mmu-miR-141-3p	chr6:124717916-124717938_-	22	24	124717938	124717914	-	Yes	No	0	0	0	8	0	0	0	0.923811
chr6:124717915-124717938_-	mmu-miR-141-3p	chr6:124717916-124717938_-	22	23	124717938	124717915	-	Yes	No	17	6	13	11	2.7724	0.808225	1.43712	1.27024
chr6:124717916-124717938_-	mmu-miR-141-3p	chr6:124717916-124717938_-	22	22	124717938	124717916	-	Yes	Yes	18	15	37	35	2.93549	2.02056	4.09027	4.04168
chr6:124717917-124717938_-	mmu-miR-141-3p	chr6:124717916-124717938_-	22	21	124717938	124717917	-	Yes	No	201	398	465	490	32.7796	53.6122	51.4048	56.5835
chr6:124717917-124717939_-	mmu-miR-141-3p	chr6:124717916-124717938_-	22	22	124717939	124717917	-	No	No	5	8	18	3	0.815413	1.07763	1.98986	0.346429
chr6:124717920-124717938_-	mmu-miR-141-3p	chr6:124717916-124717938_-	22	18	124717938	124717920	-	Yes	No	4	1	12	5	0.65233	0.134704	1.32657	0.577382
chr6:124717956-124717980_-	mmu-miR-141-5p	chr6:124717958-124717980_-	22	24	124717980	124717956	-	Yes	No	0	0	15	7	0	0	1.65822	0.808335
chr11:87756886-87756905_+	mmu-miR-142a-3p	chr11:87756902-87756925_+	23	19	87756886	87756905	+	No	No	10	10	20	6	1.63083	1.34704	2.21096	0.692859
chr11:87756901-87756921_+	mmu-miR-142a-3p	chr11:87756902-87756925_+	23	20	87756901	87756921	+	No	No	2	10	0	0	0.326165	1.34704	0	0
chr11:87756901-87756924_+	mmu-miR-142a-3p	chr11:87756902-87756925_+	23	23	87756901	87756924	+	No	No	9	18	34	3	1.46774	2.42467	3.75863	0.346429
chr11:87756901-87756925_+	mmu-miR-142a-3p	chr11:87756902-87756925_+	23	24	87756901	87756925	+	No	Yes	5	0	15	6	0.815413	0	1.65822	0.692859
chr11:87756902-87756921_+	mmu-miR-142a-3p	chr11:87756902-87756925_+	23	19	87756902	87756921	+	Yes	No	654	652	49	841	106.656	87.8271	5.41684	97.1157
chr11:87756902-87756922_+	mmu-miR-142a-3p	chr11:87756902-87756925_+	23	20	87756902	87756922	+	Yes	No	11	9	14	15	1.79391	1.21234	1.54767	1.73215
chr11:87756902-87756923_+	mmu-miR-142a-3p	chr11:87756902-87756925_+	23	21	87756902	87756923	+	Yes	No	89	151	134	149	14.5144	20.3403	14.8134	17.206
chr11:87756902-87756924_+	mmu-miR-142a-3p	chr11:87756902-87756925_+	23	22	87756902	87756924	+	Yes	No	2060	2602	3164	2483	335.95	350.5	349.773	286.728
chr11:87756902-87756925_+	mmu-miR-142a-3p	chr11:87756902-87756925_+	23	23	87756902	87756925	+	Yes	Yes	1728	2010	3222	2108	281.807	270.755	356.185	243.424
chr11:87756902-87756926_+	mmu-miR-142a-3p	chr11:87756902-87756925_+	23	24	87756902	87756926	+	Yes	No	193	299	435	323	31.4749	40.2765	48.0883	37.2989
chr11:87756902-87756927_+	mmu-miR-142a-3p	chr11:87756902-87756925_+	23	25	87756902	87756927	+	Yes	No	97	67	141	80	15.819	9.02517	15.5872	9.23811
chr11:87756903-87756921_+	mmu-miR-142a-3p	chr11:87756902-87756925_+	23	18	87756903	87756921	+	No	No	81	101	0	120	13.2097	13.6051	0	13.8572
chr11:87756903-87756924_+	mmu-miR-142a-3p	chr11:87756902-87756925_+	23	21	87756903	87756924	+	No	No	284	249	382	246	46.3155	33.5413	42.2293	28.4072
chr11:87756903-87756925_+	mmu-miR-142a-3p	chr11:87756902-87756925_+	23	22	87756903	87756925	+	No	Yes	364	349	632	368	59.3621	47.0117	69.8662	42.4953
chr11:87756903-87756926_+	mmu-miR-142a-3p	chr11:87756902-87756925_+	23	23	87756903	87756926	+	No	No	102	186	249	291	16.6344	25.055	27.5264	33.6036
chr11:87756903-87756927_+	mmu-miR-142a-3p	chr11:87756902-87756925_+	23	24	87756903	87756927	+	No	No	47	37	82	43	7.66488	4.98405	9.06492	4.96549
chr11:87756904-87756923_+	mmu-miR-142a-3p	chr11:87756902-87756925_+	23	19	87756904	87756923	+	No	No	4	0	0	8	0.65233	0	0	0.923811
chr11:87756904-87756924_+	mmu-miR-142a-3p	chr11:87756902-87756925_+	23	20	87756904	87756924	+	No	No	53	42	65	51	8.64338	5.65757	7.18561	5.8893
chr11:87756904-87756925_+	mmu-miR-142a-3p	chr11:87756902-87756925_+	23	21	87756904	87756925	+	No	Yes	109	103	337	131	17.776	13.8745	37.2546	15.1274
chr11:87756904-87756926_+	mmu-miR-142a-3p	chr11:87756902-87756925_+	23	22	87756904	87756926	+	No	No	219	211	770	324	35.7151	28.4226	85.1218	37.4144
chr11:87756904-87756927_+	mmu-miR-142a-3p	chr11:87756902-87756925_+	23	23	87756904	87756927	+	No	No	27	62	137	82	4.40323	8.35165	15.1451	9.46907
chr11:87756904-87756928_+	mmu-miR-142a-3p	chr11:87756902-87756925_+	23	24	87756904	87756928	+	No	No	5	8	0	0	0.815413	1.07763	0	0
chr11:87756905-87756925_+	mmu-miR-142a-3p	chr11:87756902-87756925_+	23	20	87756905	87756925	+	No	Yes	8	17	3	9	1.30466	2.28997	0.331644	1.03929
chr11:87756905-87756926_+	mmu-miR-142a-3p	chr11:87756902-87756925_+	23	21	87756905	87756926	+	No	No	43	49	87	53	7.01255	6.6005	9.61766	6.12025
chr11:87756905-87756927_+	mmu-miR-142a-3p	chr11:87756902-87756925_+	23	22	87756905	87756927	+	No	No	2742	2060	4268	2508	447.172	277.49	471.818	289.615
chr11:87756905-87756928_+	mmu-miR-142a-3p	chr11:87756902-87756925_+	23	23	87756905	87756928	+	No	No	7	12	32	29	1.14158	1.61645	3.53753	3.34882
chr11:87756907-87756927_+	mmu-miR-142a-3p	chr11:87756902-87756925_+	23	20	87756907	87756927	+	No	No	5	6	13	5	0.815413	0.808225	1.43712	0.577382
chr11:87756914-87756936_+	mmu-miR-142a-3p	chr11:87756902-87756925_+	23	22	87756914	87756936	+	No	No	0	12	10	6	0	1.61645	1.10548	0.692859
chr11:87756915-87756936_+	mmu-miR-142a-3p	chr11:87756902-87756925_+	23	21	87756915	87756936	+	No	No	0	11	3	13	0	1.48175	0.331644	1.50119
chr11:87756915-87756937_+	mmu-miR-142a-3p	chr11:87756902-87756925_+	23	22	87756915	87756937	+	No	No	0	34	18	0	0	4.57994	1.98986	0
chr11:87756917-87756939_+	mmu-miR-142a-3p	chr11:87756902-87756925_+	23	22	87756917	87756939	+	No	No	6	12	11	3	0.978496	1.61645	1.21603	0.346429
chr11:87756917-87756940_+	mmu-miR-142a-3p	chr11:87756902-87756925_+	23	23	87756917	87756940	+	No	No	10	0	0	8	1.63083	0	0	0.923811
chr11:87756918-87756940_+	mmu-miR-142a-3p	chr11:87756902-87756925_+	23	22	87756918	87756940	+	No	No	3	10	5	10	0.489248	1.34704	0.552739	1.15476
chr11:87756924-87756943_+	mmu-miR-142a-3p	chr11:87756902-87756925_+	23	19	87756924	87756943	+	No	No	2	1	12	0	0.326165	0.134704	1.32657	0
chr11:87756924-87756944_+	mmu-miR-142a-3p	chr11:87756902-87756925_+	23	20	87756924	87756944	+	No	No	0	5	16	6	0	0.673521	1.76877	0.692859
chr11:87756924-87756945_+	mmu-miR-142a-3p	chr11:87756902-87756925_+	23	21	87756924	87756945	+	No	No	1	13	10	27	0.163083	1.75115	1.10548	3.11786
chr11:87756924-87756946_+	mmu-miR-142a-3p	chr11:87756902-87756925_+	23	22	87756924	87756946	+	No	No	0	0	5	9	0	0	0.552739	1.03929
chr11:87756861-87756884_+	mmu-miR-142a-5p	chr11:87756866-87756887_+	21	23	87756861	87756884	+	No	No	1	9	0	2	0.163083	1.21234	0	0.230953
chr11:87756862-87756885_+	mmu-miR-142a-5p	chr11:87756866-87756887_+	21	23	87756862	87756885	+	No	No	0	0	5	8	0	0	0.552739	0.923811
chr11:87756862-87756886_+	mmu-miR-142a-5p	chr11:87756866-87756887_+	21	24	87756862	87756886	+	No	No	4	0	0	12	0.65233	0	0	1.38572
chr11:87756863-87756883_+	mmu-miR-142a-5p	chr11:87756866-87756887_+	21	20	87756863	87756883	+	No	No	66	135	17	100	10.7635	18.1851	1.87931	11.5476
chr11:87756863-87756884_+	mmu-miR-142a-5p	chr11:87756866-87756887_+	21	21	87756863	87756884	+	No	No	410	669	715	713	66.8639	90.117	79.0417	82.3347
chr11:87756863-87756885_+	mmu-miR-142a-5p	chr11:87756866-87756887_+	21	22	87756863	87756885	+	No	No	1893	2591	2846	3009	308.715	349.018	314.619	347.469
chr11:87756863-87756886_+	mmu-miR-142a-5p	chr11:87756866-87756887_+	21	23	87756863	87756886	+	No	No	185	194	232	236	30.1703	26.1326	25.6471	27.2524
chr11:87756863-87756887_+	mmu-miR-142a-5p	chr11:87756866-87756887_+	21	24	87756863	87756887	+	No	Yes	20	27	27	12	3.26165	3.63701	2.98479	1.38572
chr11:87756864-87756882_+	mmu-miR-142a-5p	chr11:87756866-87756887_+	21	18	87756864	87756882	+	No	No	29	153	20	183	4.7294	20.6097	2.21096	21.1322
chr11:87756864-87756883_+	mmu-miR-142a-5p	chr11:87756866-87756887_+	21	19	87756864	87756883	+	No	No	1666	4920	888	4719	271.696	662.744	98.1665	544.933
chr11:87756864-87756884_+	mmu-miR-142a-5p	chr11:87756866-87756887_+	21	20	87756864	87756884	+	No	No	31074	64166	46170	70822	5067.63	8643.42	5103.99	8178.27
chr11:87756864-87756885_+	mmu-miR-142a-5p	chr11:87756866-87756887_+	21	21	87756864	87756885	+	No	No	5325	15401	9575	17765	868.415	2074.58	1058.5	2051.44
chr11:87756864-87756886_+	mmu-miR-142a-5p	chr11:87756866-87756887_+	21	22	87756864	87756886	+	No	No	36280	41406	58321	58713	5916.64	5577.56	6447.26	6779.97
chr11:87756864-87756887_+	mmu-miR-142a-5p	chr11:87756866-87756887_+	21	23	87756864	87756887	+	No	Yes	2641	3302	4503	4773	430.701	444.793	497.797	551.169
chr11:87756864-87756888_+	mmu-miR-142a-5p	chr11:87756866-87756887_+	21	24	87756864	87756888	+	No	No	48	56	59	53	7.82796	7.54343	6.52232	6.12025
chr11:87756864-87756889_+	mmu-miR-142a-5p	chr11:87756866-87756887_+	21	25	87756864	87756889	+	No	No	10	0	0	6	1.63083	0	0	0.692859
chr11:87756865-87756883_+	mmu-miR-142a-5p	chr11:87756866-87756887_+	21	18	87756865	87756883	+	No	No	32	161	59	168	5.21864	21.6874	6.52232	19.4
chr11:87756865-87756884_+	mmu-miR-142a-5p	chr11:87756866-87756887_+	21	19	87756865	87756884	+	No	No	860	2046	1364	2485	140.251	275.605	150.787	286.959
chr11:87756865-87756885_+	mmu-miR-142a-5p	chr11:87756866-87756887_+	21	20	87756865	87756885	+	No	No	157	441	270	634	25.604	59.4045	29.8479	73.2121
chr11:87756865-87756886_+	mmu-miR-142a-5p	chr11:87756866-87756887_+	21	21	87756865	87756886	+	No	No	957	1018	1437	1499	156.07	137.129	158.857	173.099
chr11:87756865-87756887_+	mmu-miR-142a-5p	chr11:87756866-87756887_+	21	22	87756865	87756887	+	No	Yes	108	124	133	194	17.6129	16.7033	14.7029	22.4024
chr11:87756865-87756888_+	mmu-miR-142a-5p	chr11:87756866-87756887_+	21	23	87756865	87756888	+	No	No	10	4	19	12	1.63083	0.538816	2.10041	1.38572
chr11:87756866-87756884_+	mmu-miR-142a-5p	chr11:87756866-87756887_+	21	18	87756866	87756884	+	Yes	No	436	1462	781	2085	71.104	196.937	86.3379	240.768
chr11:87756866-87756885_+	mmu-miR-142a-5p	chr11:87756866-87756887_+	21	19	87756866	87756885	+	Yes	No	473	3557	1209	3269	77.1381	479.142	133.652	377.492
chr11:87756866-87756886_+	mmu-miR-142a-5p	chr11:87756866-87756887_+	21	20	87756866	87756886	+	Yes	No	6147	9492	12814	12459	1002.47	1278.61	1416.56	1438.72
chr11:87756866-87756887_+	mmu-miR-142a-5p	chr11:87756866-87756887_+	21	21	87756866	87756887	+	Yes	Yes	63674	73034	129095	83454	10384.1	9837.98	14271.2	9636.97
chr11:87756866-87756888_+	mmu-miR-142a-5p	chr11:87756866-87756887_+	21	22	87756866	87756888	+	Yes	No	2546	2597	5130	3140	415.208	349.827	567.11	362.596
chr11:87756866-87756889_+	mmu-miR-142a-5p	chr11:87756866-87756887_+	21	23	87756866	87756889	+	Yes	No	206	183	435	247	33.595	24.6509	48.0883	28.5227
chr11:87756866-87756890_+	mmu-miR-142a-5p	chr11:87756866-87756887_+	21	24	87756866	87756890	+	Yes	No	9	1	27	21	1.46774	0.134704	2.98479	2.42501
chr11:87756866-87756897_+	mmu-miR-142a-5p	chr11:87756866-87756887_+	21	31	87756866	87756897	+	Yes	No	2	5	4	23	0.326165	0.673521	0.442191	2.65596
chr11:87756867-87756885_+	mmu-miR-142a-5p	chr11:87756866-87756887_+	21	18	87756867	87756885	+	No	No	48	232	90	272	7.82796	31.2514	9.94931	31.4096
chr11:87756867-87756886_+	mmu-miR-142a-5p	chr11:87756866-87756887_+	21	19	87756867	87756886	+	No	No	343	377	597	605	55.9373	50.7834	65.9971	69.8632
chr11:87756867-87756887_+	mmu-miR-142a-5p	chr11:87756866-87756887_+	21	20	87756867	87756887	+	No	Yes	5273	5761	10202	7416	859.935	776.03	1127.81	856.373
chr11:87756867-87756888_+	mmu-miR-142a-5p	chr11:87756866-87756887_+	21	21	87756867	87756888	+	No	No	64	109	229	119	10.4373	14.6827	25.3155	13.7417
chr11:87756867-87756889_+	mmu-miR-142a-5p	chr11:87756866-87756887_+	21	22	87756867	87756889	+	No	No	26	23	67	26	4.24015	3.09819	7.40671	3.00239
chr11:87756867-87756890_+	mmu-miR-142a-5p	chr11:87756866-87756887_+	21	23	87756867	87756890	+	No	No	13	5	12	0	2.12007	0.673521	1.32657	0
chr11:87756868-87756886_+	mmu-miR-142a-5p	chr11:87756866-87756887_+	21	18	87756868	87756886	+	No	No	29	29	39	56	4.7294	3.90642	4.31137	6.46668
chr11:87756868-87756887_+	mmu-miR-142a-5p	chr11:87756866-87756887_+	21	19	87756868	87756887	+	No	Yes	56	44	123	87	9.13263	5.92698	13.5974	10.0464
chr18:61649196-61649218_-	mmu-miR-143-3p	chr18:61649198-61649219_-	21	22	61649218	61649196	-	No	No	9	0	0	0	1.46774	0	0	0
chr18:61649196-61649219_-	mmu-miR-143-3p	chr18:61649198-61649219_-	21	23	61649219	61649196	-	Yes	No	65	9	3	0	10.6004	1.21234	0.331644	0
chr18:61649197-61649218_-	mmu-miR-143-3p	chr18:61649198-61649219_-	21	21	61649218	61649197	-	No	No	25	14	1	0	4.07706	1.88586	0.110548	0
chr18:61649197-61649219_-	mmu-miR-143-3p	chr18:61649198-61649219_-	21	22	61649219	61649197	-	Yes	No	1220	317	10	8	198.961	42.7012	1.10548	0.923811
chr18:61649197-61649220_-	mmu-miR-143-3p	chr18:61649198-61649219_-	21	23	61649220	61649197	-	No	No	9	0	0	0	1.46774	0	0	0
chr18:61649198-61649218_-	mmu-miR-143-3p	chr18:61649198-61649219_-	21	20	61649218	61649198	-	No	Yes	17	10	0	2	2.7724	1.34704	0	0.230953
chr18:61649198-61649219_-	mmu-miR-143-3p	chr18:61649198-61649219_-	21	21	61649219	61649198	-	Yes	Yes	1055	313	2	27	172.052	42.1624	0.221096	3.11786
chr18:61649198-61649220_-	mmu-miR-143-3p	chr18:61649198-61649219_-	21	22	61649220	61649198	-	No	Yes	30	0	0	0	4.89248	0	0	0
chr18:61649199-61649218_-	mmu-miR-143-3p	chr18:61649198-61649219_-	21	19	61649218	61649199	-	No	No	17	0	0	0	2.7724	0	0	0
chr18:61649199-61649219_-	mmu-miR-143-3p	chr18:61649198-61649219_-	21	20	61649219	61649199	-	Yes	No	1009	626	4	43	164.55	84.3248	0.442191	4.96549
chr18:61649200-61649219_-	mmu-miR-143-3p	chr18:61649198-61649219_-	21	19	61649219	61649200	-	Yes	No	56	16	0	1	9.13263	2.15527	0	0.115476
chr18:61647865-61647888_-	mmu-miR-145a-5p	chr18:61647865-61647888_-	23	23	61647888	61647865	-	Yes	Yes	11	8	0	0	1.79391	1.07763	0	0
chr11:43374430-43374456_-	mmu-miR-146a-5p	chr11:43374434-43374456_-	22	26	43374456	43374430	-	Yes	No	17	31	64	42	2.7724	4.17583	7.07506	4.85001
chr11:43374431-43374455_-	mmu-miR-146a-5p	chr11:43374434-43374456_-	22	24	43374455	43374431	-	No	No	4	6	10	7	0.65233	0.808225	1.10548	0.808335
chr11:43374431-43374456_-	mmu-miR-146a-5p	chr11:43374434-43374456_-	22	25	43374456	43374431	-	Yes	No	68	73	224	150	11.0896	9.8334	24.7627	17.3215
chr11:43374431-43374457_-	mmu-miR-146a-5p	chr11:43374434-43374456_-	22	26	43374457	43374431	-	No	No	2	0	14	14	0.326165	0	1.54767	1.61667
chr11:43374432-43374455_-	mmu-miR-146a-5p	chr11:43374434-43374456_-	22	23	43374455	43374432	-	No	No	21	43	45	92	3.42473	5.79228	4.97465	10.6238
chr11:43374432-43374456_-	mmu-miR-146a-5p	chr11:43374434-43374456_-	22	24	43374456	43374432	-	Yes	No	576	1027	2088	1962	93.9356	138.341	230.824	226.565
chr11:43374432-43374457_-	mmu-miR-146a-5p	chr11:43374434-43374456_-	22	25	43374457	43374432	-	No	No	44	54	129	76	7.17563	7.27402	14.2607	8.77621
chr11:43374433-43374455_-	mmu-miR-146a-5p	chr11:43374434-43374456_-	22	22	43374455	43374433	-	No	No	33	107	109	126	5.38173	14.4133	12.0497	14.55
chr11:43374433-43374456_-	mmu-miR-146a-5p	chr11:43374434-43374456_-	22	23	43374456	43374433	-	Yes	No	1195	3228	3549	3830	194.884	434.825	392.334	442.275
chr11:43374433-43374457_-	mmu-miR-146a-5p	chr11:43374434-43374456_-	22	24	43374457	43374433	-	No	No	56	148	340	244	9.13263	19.9362	37.5863	28.1762
chr11:43374434-43374455_-	mmu-miR-146a-5p	chr11:43374434-43374456_-	22	21	43374455	43374434	-	No	Yes	81	241	223	271	13.2097	32.4637	24.6522	31.2941
chr11:43374434-43374456_-	mmu-miR-146a-5p	chr11:43374434-43374456_-	22	22	43374456	43374434	-	Yes	Yes	2576	9991	7820	9218	420.101	1345.83	864.484	1064.46
chr11:43374434-43374457_-	mmu-miR-146a-5p	chr11:43374434-43374456_-	22	23	43374457	43374434	-	No	Yes	168	410	493	619	27.3979	55.2287	54.5001	71.4799
chr11:43374435-43374455_-	mmu-miR-146a-5p	chr11:43374434-43374456_-	22	20	43374455	43374435	-	No	No	21	34	14	43	3.42473	4.57994	1.54767	4.96549
chr11:43374435-43374456_-	mmu-miR-146a-5p	chr11:43374434-43374456_-	22	21	43374456	43374435	-	Yes	No	278	753	728	942	45.337	101.432	80.4788	108.779
chr11:43374435-43374457_-	mmu-miR-146a-5p	chr11:43374434-43374456_-	22	22	43374457	43374435	-	No	No	40	69	130	138	6.5233	9.29458	14.3712	15.9357
chr11:43374436-43374456_-	mmu-miR-146a-5p	chr11:43374434-43374456_-	22	20	43374456	43374436	-	Yes	No	43	79	26	83	7.01255	10.6416	2.87424	9.58454
chr11:43374436-43374457_-	mmu-miR-146a-5p	chr11:43374434-43374456_-	22	21	43374457	43374436	-	No	No	0	11	9	25	0	1.48175	0.994931	2.88691
chr11:43374437-43374456_-	mmu-miR-146a-5p	chr11:43374434-43374456_-	22	19	43374456	43374437	-	Yes	No	9	11	24	13	1.46774	1.48175	2.65315	1.50119
chr19:46342826-46342848_+	mmu-miR-146b-3p	chr19:46342827-46342849_+	22	22	46342826	46342848	+	No	No	0	7	14	17	0	0.942929	1.54767	1.9631
chr19:46342827-46342845_+	mmu-miR-146b-3p	chr19:46342827-46342849_+	22	18	46342827	46342845	+	Yes	No	14	16	0	11	2.28316	2.15527	0	1.27024
chr19:46342827-46342847_+	mmu-miR-146b-3p	chr19:46342827-46342849_+	22	20	46342827	46342847	+	Yes	No	6	11	4	13	0.978496	1.48175	0.442191	1.50119
chr19:46342827-46342848_+	mmu-miR-146b-3p	chr19:46342827-46342849_+	22	21	46342827	46342848	+	Yes	No	38	100	64	83	6.19714	13.4704	7.07506	9.58454
chr19:46342827-46342849_+	mmu-miR-146b-3p	chr19:46342827-46342849_+	22	22	46342827	46342849	+	Yes	Yes	235	150	282	133	38.3244	20.2056	31.1745	15.3584
chr19:46342827-46342850_+	mmu-miR-146b-3p	chr19:46342827-46342849_+	22	23	46342827	46342850	+	Yes	No	15	9	26	8	2.44624	1.21234	2.87424	0.923811
chr19:46342828-46342848_+	mmu-miR-146b-3p	chr19:46342827-46342849_+	22	20	46342828	46342848	+	No	No	3	18	0	18	0.489248	2.42467	0	2.07858
chr19:46342828-46342849_+	mmu-miR-146b-3p	chr19:46342827-46342849_+	22	21	46342828	46342849	+	No	Yes	4	4	16	9	0.65233	0.538816	1.76877	1.03929
chr19:46342828-46342850_+	mmu-miR-146b-3p	chr19:46342827-46342849_+	22	22	46342828	46342850	+	No	No	40	11	47	24	6.5233	1.48175	5.19575	2.77143
chr19:46342828-46342851_+	mmu-miR-146b-3p	chr19:46342827-46342849_+	22	23	46342828	46342851	+	No	No	19	17	17	6	3.09857	2.28997	1.87931	0.692859
chr19:46342829-46342849_+	mmu-miR-146b-3p	chr19:46342827-46342849_+	22	20	46342829	46342849	+	No	Yes	2	5	11	8	0.326165	0.673521	1.21603	0.923811
chr19:46342829-46342850_+	mmu-miR-146b-3p	chr19:46342827-46342849_+	22	21	46342829	46342850	+	No	No	16	14	32	20	2.60932	1.88586	3.53753	2.30953
chr19:46342829-46342851_+	mmu-miR-146b-3p	chr19:46342827-46342849_+	22	22	46342829	46342851	+	No	No	15	2	8	13	2.44624	0.269408	0.884383	1.50119
chr19:46342830-46342848_+	mmu-miR-146b-3p	chr19:46342827-46342849_+	22	18	46342830	46342848	+	No	No	0	0	0	16	0	0	0	1.84762
chr19:46342785-46342812_+	mmu-miR-146b-5p	chr19:46342789-46342811_+	22	27	46342785	46342812	+	No	No	11	6	2	5	1.79391	0.808225	0.221096	0.577382
chr19:46342785-46342813_+	mmu-miR-146b-5p	chr19:46342789-46342811_+	22	28	46342785	46342813	+	No	No	3	4	14	5	0.489248	0.538816	1.54767	0.577382
chr19:46342786-46342812_+	mmu-miR-146b-5p	chr19:46342789-46342811_+	22	26	46342786	46342812	+	No	No	34	45	31	58	5.54481	6.06168	3.42698	6.69763
chr19:46342786-46342813_+	mmu-miR-146b-5p	chr19:46342789-46342811_+	22	27	46342786	46342813	+	No	No	98	75	133	105	15.9821	10.1028	14.7029	12.125
chr19:46342787-46342812_+	mmu-miR-146b-5p	chr19:46342789-46342811_+	22	25	46342787	46342812	+	No	No	29	19	16	11	4.7294	2.55938	1.76877	1.27024
chr19:46342787-46342813_+	mmu-miR-146b-5p	chr19:46342789-46342811_+	22	26	46342787	46342813	+	No	No	42	24	54	46	6.84947	3.2329	5.96958	5.31192
chr19:46342788-46342810_+	mmu-miR-146b-5p	chr19:46342789-46342811_+	22	22	46342788	46342810	+	No	No	23	32	3	28	3.7509	4.31053	0.331644	3.23334
chr19:46342788-46342811_+	mmu-miR-146b-5p	chr19:46342789-46342811_+	22	23	46342788	46342811	+	No	Yes	10	32	25	26	1.63083	4.31053	2.7637	3.00239
chr19:46342788-46342812_+	mmu-miR-146b-5p	chr19:46342789-46342811_+	22	24	46342788	46342812	+	No	No	380	596	600	627	61.9714	80.2836	66.3287	72.4037
chr19:46342788-46342813_+	mmu-miR-146b-5p	chr19:46342789-46342811_+	22	25	46342788	46342813	+	No	No	1741	1762	2859	1895	283.927	237.349	316.056	218.828
chr19:46342788-46342814_+	mmu-miR-146b-5p	chr19:46342789-46342811_+	22	26	46342788	46342814	+	No	No	12	22	23	21	1.95699	2.96349	2.5426	2.42501
chr19:46342788-46342815_+	mmu-miR-146b-5p	chr19:46342789-46342811_+	22	27	46342788	46342815	+	No	No	24	21	41	23	3.91398	2.82879	4.53246	2.65596
chr19:46342789-46342807_+	mmu-miR-146b-5p	chr19:46342789-46342811_+	22	18	46342789	46342807	+	Yes	No	2	15	0	18	0.326165	2.02056	0	2.07858
chr19:46342789-46342808_+	mmu-miR-146b-5p	chr19:46342789-46342811_+	22	19	46342789	46342808	+	Yes	No	11	25	18	59	1.79391	3.3676	1.98986	6.81311
chr19:46342789-46342809_+	mmu-miR-146b-5p	chr19:46342789-46342811_+	22	20	46342789	46342809	+	Yes	No	1112	1874	2376	2910	181.348	252.435	262.662	336.036
chr19:46342789-46342810_+	mmu-miR-146b-5p	chr19:46342789-46342811_+	22	21	46342789	46342810	+	Yes	No	8937	11197	6030	12937	1457.47	1508.28	666.604	1493.92
chr19:46342789-46342811_+	mmu-miR-146b-5p	chr19:46342789-46342811_+	22	22	46342789	46342811	+	Yes	Yes	12719	21023	21819	26354	2074.25	2831.88	2412.04	3043.27
chr19:46342789-46342812_+	mmu-miR-146b-5p	chr19:46342789-46342811_+	22	23	46342789	46342812	+	Yes	No	128445	190871	165349	173705	20947.1	25711.1	18279	20058.8
chr19:46342789-46342813_+	mmu-miR-146b-5p	chr19:46342789-46342811_+	22	24	46342789	46342813	+	Yes	No	475782	460696	739268	511347	77591.8	62057.6	81724.5	59048.5
chr19:46342789-46342814_+	mmu-miR-146b-5p	chr19:46342789-46342811_+	22	25	46342789	46342814	+	Yes	No	6734	8679	11614	10495	1098.2	1169.1	1283.9	1211.93
chr19:46342789-46342815_+	mmu-miR-146b-5p	chr19:46342789-46342811_+	22	26	46342789	46342815	+	Yes	No	7555	6478	14938	9946	1232.09	872.613	1651.36	1148.53
chr19:46342789-46342816_+	mmu-miR-146b-5p	chr19:46342789-46342811_+	22	27	46342789	46342816	+	Yes	No	220	79	472	140	35.8782	10.6416	52.1786	16.1667
chr19:46342789-46342817_+	mmu-miR-146b-5p	chr19:46342789-46342811_+	22	28	46342789	46342817	+	Yes	No	51	12	86	26	8.31721	1.61645	9.50712	3.00239
chr19:46342789-46342818_+	mmu-miR-146b-5p	chr19:46342789-46342811_+	22	29	46342789	46342818	+	Yes	No	5	4	23	7	0.815413	0.538816	2.5426	0.808335
chr19:46342790-46342809_+	mmu-miR-146b-5p	chr19:46342789-46342811_+	22	19	46342790	46342809	+	No	No	26	64	43	69	4.24015	8.62106	4.75356	7.96787
chr19:46342790-46342810_+	mmu-miR-146b-5p	chr19:46342789-46342811_+	22	20	46342790	46342810	+	No	No	216	291	143	384	35.2258	39.1989	15.8083	44.343
chr19:46342790-46342811_+	mmu-miR-146b-5p	chr19:46342789-46342811_+	22	21	46342790	46342811	+	No	Yes	294	494	450	684	47.9463	66.5438	49.7465	78.9859
chr19:46342790-46342812_+	mmu-miR-146b-5p	chr19:46342789-46342811_+	22	22	46342790	46342812	+	No	No	2915	4054	3520	4101	475.386	546.09	389.128	473.569
chr19:46342790-46342813_+	mmu-miR-146b-5p	chr19:46342789-46342811_+	22	23	46342790	46342813	+	No	No	11258	10821	16953	13052	1835.98	1457.63	1874.12	1507.2
chr19:46342790-46342814_+	mmu-miR-146b-5p	chr19:46342789-46342811_+	22	24	46342790	46342814	+	No	No	195	250	345	317	31.8011	33.676	38.139	36.606
chr19:46342790-46342815_+	mmu-miR-146b-5p	chr19:46342789-46342811_+	22	25	46342790	46342815	+	No	No	215	248	416	294	35.0628	33.4066	45.9879	33.9501
chr19:46342791-46342812_+	mmu-miR-146b-5p	chr19:46342789-46342811_+	22	21	46342791	46342812	+	No	No	15	19	13	27	2.44624	2.55938	1.43712	3.11786
chr19:46342791-46342813_+	mmu-miR-146b-5p	chr19:46342789-46342811_+	22	22	46342791	46342813	+	No	No	39	50	69	54	6.36022	6.73521	7.6278	6.23573
chr19:46342792-46342812_+	mmu-miR-146b-5p	chr19:46342789-46342811_+	22	20	46342792	46342812	+	No	No	48	55	36	53	7.82796	7.40873	3.97972	6.12025
chr19:46342792-46342813_+	mmu-miR-146b-5p	chr19:46342789-46342811_+	22	21	46342792	46342813	+	No	No	107	101	157	160	17.4498	13.6051	17.356	18.4762
chr19:46342793-46342812_+	mmu-miR-146b-5p	chr19:46342789-46342811_+	22	19	46342793	46342812	+	No	No	28	55	42	73	4.56631	7.40873	4.64301	8.42978
chr19:46342793-46342813_+	mmu-miR-146b-5p	chr19:46342789-46342811_+	22	20	46342793	46342813	+	No	No	222	194	266	244	36.2043	26.1326	29.4057	28.1762
chr19:46342793-46342815_+	mmu-miR-146b-5p	chr19:46342789-46342811_+	22	22	46342793	46342815	+	No	No	1	6	9	4	0.163083	0.808225	0.994931	0.461906
chr19:46342794-46342812_+	mmu-miR-146b-5p	chr19:46342789-46342811_+	22	18	46342794	46342812	+	No	No	22	42	49	49	3.58782	5.65757	5.41684	5.65835
chr19:46342794-46342813_+	mmu-miR-146b-5p	chr19:46342789-46342811_+	22	19	46342794	46342813	+	No	No	219	205	328	272	35.7151	27.6143	36.2597	31.4096
chr19:46342794-46342814_+	mmu-miR-146b-5p	chr19:46342789-46342811_+	22	20	46342794	46342814	+	No	No	3	11	0	3	0.489248	1.48175	0	0.346429
chr19:46342794-46342815_+	mmu-miR-146b-5p	chr19:46342789-46342811_+	22	21	46342794	46342815	+	No	No	8	7	10	1	1.30466	0.942929	1.10548	0.115476
chr19:46342795-46342813_+	mmu-miR-146b-5p	chr19:46342789-46342811_+	22	18	46342795	46342813	+	No	No	53	61	82	88	8.64338	8.21695	9.06492	10.1619
chr19:46342802-46342827_+	mmu-miR-146b-5p	chr19:46342789-46342811_+	22	25	46342802	46342827	+	No	No	8	0	0	0	1.30466	0	0	0
chr2:122640847-122640870_+	mmu-miR-147-3p	chr2:122640849-122640871_+	22	23	122640847	122640870	+	No	No	15	0	0	0	2.44624	0	0	0
chr2:122640848-122640866_+	mmu-miR-147-3p	chr2:122640849-122640871_+	22	18	122640848	122640866	+	No	No	16	50	0	29	2.60932	6.73521	0	3.34882
chr2:122640848-122640867_+	mmu-miR-147-3p	chr2:122640849-122640871_+	22	19	122640848	122640867	+	No	No	4	18	4	9	0.65233	2.42467	0.442191	1.03929
chr2:122640848-122640868_+	mmu-miR-147-3p	chr2:122640849-122640871_+	22	20	122640848	122640868	+	No	No	20	143	24	122	3.26165	19.2627	2.65315	14.0881
chr2:122640848-122640869_+	mmu-miR-147-3p	chr2:122640849-122640871_+	22	21	122640848	122640869	+	No	No	98	166	73	130	15.9821	22.3609	8.06999	15.0119
chr2:122640848-122640870_+	mmu-miR-147-3p	chr2:122640849-122640871_+	22	22	122640848	122640870	+	No	No	854	1941	499	1078	139.273	261.461	55.1634	124.484
chr2:122640848-122640871_+	mmu-miR-147-3p	chr2:122640849-122640871_+	22	23	122640848	122640871	+	No	Yes	109	131	82	117	17.776	17.6462	9.06492	13.5107
chr2:122640848-122640872_+	mmu-miR-147-3p	chr2:122640849-122640871_+	22	24	122640848	122640872	+	No	No	19	23	13	11	3.09857	3.09819	1.43712	1.27024
chr2:122640848-122640873_+	mmu-miR-147-3p	chr2:122640849-122640871_+	22	25	122640848	122640873	+	No	No	3	7	19	25	0.489248	0.942929	2.10041	2.88691
chr2:122640849-122640867_+	mmu-miR-147-3p	chr2:122640849-122640871_+	22	18	122640849	122640867	+	Yes	No	9	35	6	44	1.46774	4.71464	0.663287	5.08096
chr2:122640849-122640868_+	mmu-miR-147-3p	chr2:122640849-122640871_+	22	19	122640849	122640868	+	Yes	No	59	657	85	460	9.62187	88.5006	9.39657	53.1192
chr2:122640849-122640869_+	mmu-miR-147-3p	chr2:122640849-122640871_+	22	20	122640849	122640869	+	Yes	No	283	755	220	480	46.1524	101.702	24.3205	55.4287
chr2:122640849-122640870_+	mmu-miR-147-3p	chr2:122640849-122640871_+	22	21	122640849	122640870	+	Yes	No	1759	5110	1635	2813	286.862	688.338	180.746	324.835
chr2:122640849-122640871_+	mmu-miR-147-3p	chr2:122640849-122640871_+	22	22	122640849	122640871	+	Yes	Yes	3087	9693	2355	5889	503.436	1305.69	260.34	680.041
chr2:122640849-122640872_+	mmu-miR-147-3p	chr2:122640849-122640871_+	22	23	122640849	122640872	+	Yes	No	321	471	249	278	52.3495	63.4456	27.5264	32.1024
chr2:122640849-122640873_+	mmu-miR-147-3p	chr2:122640849-122640871_+	22	24	122640849	122640873	+	Yes	No	131	150	73	131	21.3638	20.2056	8.06999	15.1274
chr2:122640849-122640874_+	mmu-miR-147-3p	chr2:122640849-122640871_+	22	25	122640849	122640874	+	Yes	No	12	8	9	7	1.95699	1.07763	0.994931	0.808335
chr2:122640849-122640875_+	mmu-miR-147-3p	chr2:122640849-122640871_+	22	26	122640849	122640875	+	Yes	No	8	9	0	3	1.30466	1.21234	0	0.346429
chr2:122640850-122640868_+	mmu-miR-147-3p	chr2:122640849-122640871_+	22	18	122640850	122640868	+	No	No	0	7	0	11	0	0.942929	0	1.27024
chr2:122640850-122640869_+	mmu-miR-147-3p	chr2:122640849-122640871_+	22	19	122640850	122640869	+	No	No	4	8	0	0	0.65233	1.07763	0	0
chr2:122640850-122640870_+	mmu-miR-147-3p	chr2:122640849-122640871_+	22	20	122640850	122640870	+	No	No	12	77	36	72	1.95699	10.3722	3.97972	8.3143
chr2:122640850-122640871_+	mmu-miR-147-3p	chr2:122640849-122640871_+	22	21	122640850	122640871	+	No	Yes	50	58	17	48	8.15413	7.81284	1.87931	5.54287
chr2:122640850-122640873_+	mmu-miR-147-3p	chr2:122640849-122640871_+	22	23	122640850	122640873	+	No	No	7	7	12	1	1.14158	0.942929	1.32657	0.115476
chr2:122640809-122640831_+	mmu-miR-147-5p	chr2:122640813-122640837_+	24	22	122640809	122640831	+	No	No	0	11	9	6	0	1.48175	0.994931	0.692859
chr2:122640811-122640835_+	mmu-miR-147-5p	chr2:122640813-122640837_+	24	24	122640811	122640835	+	No	No	0	12	11	4	0	1.61645	1.21603	0.461906
chr2:122640812-122640833_+	mmu-miR-147-5p	chr2:122640813-122640837_+	24	21	122640812	122640833	+	No	No	9	16	0	0	1.46774	2.15527	0	0
chr2:122640812-122640834_+	mmu-miR-147-5p	chr2:122640813-122640837_+	24	22	122640812	122640834	+	No	No	11	4	0	0	1.79391	0.538816	0	0
chr2:122640812-122640835_+	mmu-miR-147-5p	chr2:122640813-122640837_+	24	23	122640812	122640835	+	No	No	58	203	39	138	9.45879	27.3449	4.31137	15.9357
chr2:122640813-122640832_+	mmu-miR-147-5p	chr2:122640813-122640837_+	24	19	122640813	122640832	+	Yes	No	0	8	0	3	0	1.07763	0	0.346429
chr2:122640813-122640833_+	mmu-miR-147-5p	chr2:122640813-122640837_+	24	20	122640813	122640833	+	Yes	No	7	6	9	3	1.14158	0.808225	0.994931	0.346429
chr2:122640813-122640834_+	mmu-miR-147-5p	chr2:122640813-122640837_+	24	21	122640813	122640834	+	Yes	No	46	105	22	62	7.5018	14.1439	2.43205	7.15954
chr2:122640813-122640835_+	mmu-miR-147-5p	chr2:122640813-122640837_+	24	22	122640813	122640835	+	Yes	No	3344	5069	2690	3302	545.348	682.815	297.374	381.303
chr2:122640813-122640836_+	mmu-miR-147-5p	chr2:122640813-122640837_+	24	23	122640813	122640836	+	Yes	No	17	61	38	15	2.7724	8.21695	4.20082	1.73215
chr2:122640813-122640837_+	mmu-miR-147-5p	chr2:122640813-122640837_+	24	24	122640813	122640837	+	Yes	Yes	69	121	32	96	11.2527	16.2992	3.53753	11.0857
chr2:122640813-122640838_+	mmu-miR-147-5p	chr2:122640813-122640837_+	24	25	122640813	122640838	+	Yes	No	17	16	26	18	2.7724	2.15527	2.87424	2.07858
chr2:122640814-122640835_+	mmu-miR-147-5p	chr2:122640813-122640837_+	24	21	122640814	122640835	+	No	No	31	50	12	40	5.05556	6.73521	1.32657	4.61906
chr6:51269824-51269850_-	mmu-miR-148a-3p	chr6:51269828-51269850_-	22	26	51269850	51269824	-	Yes	No	16	9	52	10	2.60932	1.21234	5.74849	1.15476
chr6:51269825-51269850_-	mmu-miR-148a-3p	chr6:51269828-51269850_-	22	25	51269850	51269825	-	Yes	No	132	67	254	99	21.5269	9.02517	28.0792	11.4322
chr6:51269826-51269848_-	mmu-miR-148a-3p	chr6:51269828-51269850_-	22	22	51269848	51269826	-	No	No	1	1	27	17	0.163083	0.134704	2.98479	1.9631
chr6:51269826-51269849_-	mmu-miR-148a-3p	chr6:51269828-51269850_-	22	23	51269849	51269826	-	No	No	122	138	175	129	19.8961	18.5892	19.3459	14.8965
chr6:51269826-51269850_-	mmu-miR-148a-3p	chr6:51269828-51269850_-	22	24	51269850	51269826	-	Yes	No	6595	6301	12530	7494	1075.53	848.771	1385.16	865.38
chr6:51269826-51269851_-	mmu-miR-148a-3p	chr6:51269828-51269850_-	22	25	51269851	51269826	-	No	No	0	2	10	0	0	0.269408	1.10548	0
chr6:51269827-51269846_-	mmu-miR-148a-3p	chr6:51269828-51269850_-	22	19	51269846	51269827	-	No	No	0	0	0	9	0	0	0	1.03929
chr6:51269827-51269848_-	mmu-miR-148a-3p	chr6:51269828-51269850_-	22	21	51269848	51269827	-	No	No	53	53	64	59	8.64338	7.13932	7.07506	6.81311
chr6:51269827-51269849_-	mmu-miR-148a-3p	chr6:51269828-51269850_-	22	22	51269849	51269827	-	No	No	634	572	838	602	103.394	77.0507	92.6391	69.5168
chr6:51269827-51269850_-	mmu-miR-148a-3p	chr6:51269828-51269850_-	22	23	51269850	51269827	-	Yes	No	31764	31696	51433	32381	5180.16	4269.58	5685.81	3739.24
chr6:51269827-51269851_-	mmu-miR-148a-3p	chr6:51269828-51269850_-	22	24	51269851	51269827	-	No	No	24	23	19	12	3.91398	3.09819	2.10041	1.38572
chr6:51269828-51269848_-	mmu-miR-148a-3p	chr6:51269828-51269850_-	22	20	51269848	51269828	-	No	Yes	104	134	141	130	16.9606	18.0503	15.5872	15.0119
chr6:51269828-51269849_-	mmu-miR-148a-3p	chr6:51269828-51269850_-	22	21	51269849	51269828	-	No	Yes	1232	1528	1914	1712	200.918	205.828	211.589	197.696
chr6:51269828-51269850_-	mmu-miR-148a-3p	chr6:51269828-51269850_-	22	22	51269850	51269828	-	Yes	Yes	80416	106993	128248	95172	13114.5	14412.4	14177.5	10990.1
chr6:51269828-51269851_-	mmu-miR-148a-3p	chr6:51269828-51269850_-	22	23	51269851	51269828	-	No	Yes	41	50	97	41	6.68639	6.73521	10.7231	4.73453
chr6:51269828-51269852_-	mmu-miR-148a-3p	chr6:51269828-51269850_-	22	24	51269852	51269828	-	No	Yes	0	4	11	5	0	0.538816	1.21603	0.577382
chr6:51269829-51269849_-	mmu-miR-148a-3p	chr6:51269828-51269850_-	22	20	51269849	51269829	-	No	No	16	41	5	66	2.60932	5.52287	0.552739	7.62144
chr6:51269829-51269850_-	mmu-miR-148a-3p	chr6:51269828-51269850_-	22	21	51269850	51269829	-	Yes	No	2063	3351	767	2729	336.439	451.393	84.7902	315.135
chr6:51269830-51269850_-	mmu-miR-148a-3p	chr6:51269828-51269850_-	22	20	51269850	51269830	-	Yes	No	13	23	9	31	2.12007	3.09819	0.994931	3.57977
chr6:51269831-51269849_-	mmu-miR-148a-3p	chr6:51269828-51269850_-	22	18	51269849	51269831	-	No	No	24	46	0	58	3.91398	6.19639	0	6.69763
chr6:51269831-51269850_-	mmu-miR-148a-3p	chr6:51269828-51269850_-	22	19	51269850	51269831	-	Yes	No	2191	3611	31	4061	357.314	486.417	3.42698	468.95
chr6:51269832-51269850_-	mmu-miR-148a-3p	chr6:51269828-51269850_-	22	18	51269850	51269832	-	Yes	No	152	455	2	518	24.7886	61.2904	0.221096	59.8168
chr6:51269866-51269888_-	mmu-miR-148a-5p	chr6:51269866-51269888_-	22	22	51269888	51269866	-	Yes	Yes	848	461	1284	826	138.294	62.0986	141.943	95.3835
chr6:51269866-51269889_-	mmu-miR-148a-5p	chr6:51269866-51269888_-	22	23	51269889	51269866	-	No	Yes	34	20	109	73	5.54481	2.69408	12.0497	8.42978
chr6:51269867-51269888_-	mmu-miR-148a-5p	chr6:51269866-51269888_-	22	21	51269888	51269867	-	Yes	No	18	7	27	7	2.93549	0.942929	2.98479	0.808335
chr6:51269868-51269888_-	mmu-miR-148a-5p	chr6:51269866-51269888_-	22	20	51269888	51269868	-	Yes	No	1	10	10	18	0.163083	1.34704	1.10548	2.07858
chr15:103285183-103285206_+	mmu-miR-148b-3p	chr15:103285184-103285206_+	22	23	103285183	103285206	+	No	Yes	12	23	22	30	1.95699	3.09819	2.43205	3.46429
chr15:103285183-103285207_+	mmu-miR-148b-3p	chr15:103285184-103285206_+	22	24	103285183	103285207	+	No	No	22	17	23	10	3.58782	2.28997	2.5426	1.15476
chr15:103285183-103285208_+	mmu-miR-148b-3p	chr15:103285184-103285206_+	22	25	103285183	103285208	+	No	No	1	8	3	0	0.163083	1.07763	0.331644	0
chr15:103285184-103285202_+	mmu-miR-148b-3p	chr15:103285184-103285206_+	22	18	103285184	103285202	+	Yes	No	12	30	1	42	1.95699	4.04112	0.110548	4.85001
chr15:103285184-103285203_+	mmu-miR-148b-3p	chr15:103285184-103285206_+	22	19	103285184	103285203	+	Yes	No	193	307	6	361	31.4749	41.3542	0.663287	41.687
chr15:103285184-103285204_+	mmu-miR-148b-3p	chr15:103285184-103285206_+	22	20	103285184	103285204	+	Yes	No	40	45	27	73	6.5233	6.06168	2.98479	8.42978
chr15:103285184-103285205_+	mmu-miR-148b-3p	chr15:103285184-103285206_+	22	21	103285184	103285205	+	Yes	No	1228	2053	1580	2362	200.265	276.548	174.666	272.755
chr15:103285184-103285206_+	mmu-miR-148b-3p	chr15:103285184-103285206_+	22	22	103285184	103285206	+	Yes	Yes	30028	36861	59859	46742	4897.04	4965.33	6617.28	5397.6
chr15:103285184-103285207_+	mmu-miR-148b-3p	chr15:103285184-103285206_+	22	23	103285184	103285207	+	Yes	No	28171	30509	48537	37153	4594.2	4109.69	5365.66	4290.3
chr15:103285184-103285208_+	mmu-miR-148b-3p	chr15:103285184-103285206_+	22	24	103285184	103285208	+	Yes	No	7966	6822	14583	9660	1299.12	918.951	1612.12	1115.5
chr15:103285184-103285209_+	mmu-miR-148b-3p	chr15:103285184-103285206_+	22	25	103285184	103285209	+	Yes	No	263	204	684	324	42.8907	27.4796	75.6147	37.4144
chr15:103285185-103285203_+	mmu-miR-148b-3p	chr15:103285184-103285206_+	22	18	103285185	103285203	+	No	No	0	6	0	14	0	0.808225	0	1.61667
chr15:103285185-103285205_+	mmu-miR-148b-3p	chr15:103285184-103285206_+	22	20	103285185	103285205	+	No	No	22	26	13	77	3.58782	3.50231	1.43712	8.89169
chr15:103285185-103285206_+	mmu-miR-148b-3p	chr15:103285184-103285206_+	22	21	103285185	103285206	+	No	Yes	567	670	894	1021	92.4678	90.2517	98.8298	117.901
chr15:103285185-103285207_+	mmu-miR-148b-3p	chr15:103285184-103285206_+	22	22	103285185	103285207	+	No	No	483	597	796	912	78.7689	80.4183	87.9961	105.315
chr15:103285185-103285208_+	mmu-miR-148b-3p	chr15:103285184-103285206_+	22	23	103285185	103285208	+	No	No	114	115	204	174	18.5914	15.491	22.5518	20.0929
chr15:103285185-103285209_+	mmu-miR-148b-3p	chr15:103285184-103285206_+	22	24	103285185	103285209	+	No	No	9	6	6	11	1.46774	0.808225	0.663287	1.27024
chr15:103285186-103285206_+	mmu-miR-148b-3p	chr15:103285184-103285206_+	22	20	103285186	103285206	+	No	Yes	87	127	106	167	14.1882	17.1074	11.7181	19.2846
chr15:103285186-103285207_+	mmu-miR-148b-3p	chr15:103285184-103285206_+	22	21	103285186	103285207	+	No	No	74	69	77	98	12.0681	9.29458	8.51218	11.3167
chr15:103285186-103285208_+	mmu-miR-148b-3p	chr15:103285184-103285206_+	22	22	103285186	103285208	+	No	No	18	10	32	18	2.93549	1.34704	3.53753	2.07858
chr15:103285146-103285170_+	mmu-miR-148b-5p	chr15:103285147-103285171_+	24	24	103285146	103285170	+	No	No	2	24	0	0	0.326165	3.2329	0	0
chr15:103285147-103285167_+	mmu-miR-148b-5p	chr15:103285147-103285171_+	24	20	103285147	103285167	+	Yes	No	11	0	0	0	1.79391	0	0	0
chr15:103285147-103285169_+	mmu-miR-148b-5p	chr15:103285147-103285171_+	24	22	103285147	103285169	+	Yes	No	6	60	5	38	0.978496	8.08225	0.552739	4.3881
chr15:103285147-103285170_+	mmu-miR-148b-5p	chr15:103285147-103285171_+	24	23	103285147	103285170	+	Yes	No	110	127	130	200	17.9391	17.1074	14.3712	23.0953
chr15:103285147-103285171_+	mmu-miR-148b-5p	chr15:103285147-103285171_+	24	24	103285147	103285171	+	Yes	Yes	95	67	175	156	15.4928	9.02517	19.3459	18.0143
chr15:103285148-103285169_+	mmu-miR-148b-5p	chr15:103285147-103285171_+	24	21	103285148	103285169	+	No	No	0	0	0	9	0	0	0	1.03929
chr15:103285148-103285170_+	mmu-miR-148b-5p	chr15:103285147-103285171_+	24	22	103285148	103285170	+	No	No	11	6	8	12	1.79391	0.808225	0.884383	1.38572
chr15:103285148-103285171_+	mmu-miR-148b-5p	chr15:103285147-103285171_+	24	23	103285148	103285171	+	No	Yes	15	7	26	14	2.44624	0.942929	2.87424	1.61667
chr1:92850380-92850399_+	mmu-miR-149-5p	chr1:92850380-92850403_+	23	19	92850380	92850399	+	Yes	No	3	8	16	18	0.489248	1.07763	1.76877	2.07858
chr1:92850380-92850400_+	mmu-miR-149-5p	chr1:92850380-92850403_+	23	20	92850380	92850400	+	Yes	No	10	143	63	229	1.63083	19.2627	6.96451	26.4441
chr1:92850380-92850401_+	mmu-miR-149-5p	chr1:92850380-92850403_+	23	21	92850380	92850401	+	Yes	No	88	356	220	639	14.3513	47.9547	24.3205	73.7894
chr1:92850380-92850402_+	mmu-miR-149-5p	chr1:92850380-92850403_+	23	22	92850380	92850402	+	Yes	No	82	308	471	275	13.3728	41.4889	52.068	31.756
chr1:92850380-92850403_+	mmu-miR-149-5p	chr1:92850380-92850403_+	23	23	92850380	92850403	+	Yes	Yes	355	667	1143	723	57.8943	89.8476	126.356	83.4895
chr1:92850380-92850404_+	mmu-miR-149-5p	chr1:92850380-92850403_+	23	24	92850380	92850404	+	Yes	No	119	283	444	358	19.4068	38.1213	49.0832	41.3406
chr1:92850380-92850405_+	mmu-miR-149-5p	chr1:92850380-92850403_+	23	25	92850380	92850405	+	Yes	No	10	19	28	20	1.63083	2.55938	3.09534	2.30953
chr1:92850381-92850401_+	mmu-miR-149-5p	chr1:92850380-92850403_+	23	20	92850381	92850401	+	No	No	0	4	0	8	0	0.538816	0	0.923811
chr1:92850381-92850403_+	mmu-miR-149-5p	chr1:92850380-92850403_+	23	22	92850381	92850403	+	No	Yes	2	2	19	0	0.326165	0.269408	2.10041	0
chr1:92850381-92850404_+	mmu-miR-149-5p	chr1:92850380-92850403_+	23	23	92850381	92850404	+	No	No	0	1	3	15	0	0.134704	0.331644	1.73215
chr1:92850382-92850403_+	mmu-miR-149-5p	chr1:92850380-92850403_+	23	21	92850382	92850403	+	No	Yes	7	0	10	0	1.14158	0	1.10548	0
chr1:92850385-92850403_+	mmu-miR-149-5p	chr1:92850380-92850403_+	23	18	92850385	92850403	+	No	Yes	1	6	8	8	0.163083	0.808225	0.884383	0.923811
chr7:45121761-45121779_+	mmu-miR-150-5p	chr7:45121761-45121783_+	22	18	45121761	45121779	+	Yes	No	0	6	0	10	0	0.808225	0	1.15476
chr7:45121761-45121780_+	mmu-miR-150-5p	chr7:45121761-45121783_+	22	19	45121761	45121780	+	Yes	No	0	0	7	9	0	0	0.773835	1.03929
chr7:45121761-45121781_+	mmu-miR-150-5p	chr7:45121761-45121783_+	22	20	45121761	45121781	+	Yes	No	49	132	21	98	7.99105	17.7809	2.3215	11.3167
chr7:45121761-45121782_+	mmu-miR-150-5p	chr7:45121761-45121783_+	22	21	45121761	45121782	+	Yes	No	79	349	203	256	12.8835	47.0117	22.4412	29.562
chr7:45121761-45121783_+	mmu-miR-150-5p	chr7:45121761-45121783_+	22	22	45121761	45121783	+	Yes	Yes	301	771	580	638	49.0879	103.857	64.1178	73.674
chr7:45121761-45121784_+	mmu-miR-150-5p	chr7:45121761-45121783_+	22	23	45121761	45121784	+	Yes	No	342	541	582	477	55.7742	72.8749	64.3389	55.0823
chr7:45121761-45121785_+	mmu-miR-150-5p	chr7:45121761-45121783_+	22	24	45121761	45121785	+	Yes	No	0	4	16	7	0	0.538816	1.76877	0.808335
chr7:45121762-45121782_+	mmu-miR-150-5p	chr7:45121761-45121783_+	22	20	45121762	45121782	+	No	No	7	11	0	3	1.14158	1.48175	0	0.346429
chr7:45121762-45121783_+	mmu-miR-150-5p	chr7:45121761-45121783_+	22	21	45121762	45121783	+	No	Yes	8	24	7	10	1.30466	3.2329	0.773835	1.15476
chr7:45121762-45121784_+	mmu-miR-150-5p	chr7:45121761-45121783_+	22	22	45121762	45121784	+	No	No	5	7	26	10	0.815413	0.942929	2.87424	1.15476
chr7:45121763-45121784_+	mmu-miR-150-5p	chr7:45121761-45121783_+	22	21	45121763	45121784	+	No	No	0	8	0	0	0	1.07763	0	0
chr15:73254814-73254840_-	mmu-miR-151-3p	chr15:73254819-73254840_-	21	26	73254840	73254814	-	Yes	No	0	0	13	4	0	0	1.43712	0.461906
chr15:73254815-73254840_-	mmu-miR-151-3p	chr15:73254819-73254840_-	21	25	73254840	73254815	-	Yes	No	16	32	63	71	2.60932	4.31053	6.96451	8.19883
chr15:73254816-73254838_-	mmu-miR-151-3p	chr15:73254819-73254840_-	21	22	73254838	73254816	-	No	No	12	9	24	26	1.95699	1.21234	2.65315	3.00239
chr15:73254816-73254839_-	mmu-miR-151-3p	chr15:73254819-73254840_-	21	23	73254839	73254816	-	No	No	18	53	86	75	2.93549	7.13932	9.50712	8.66073
chr15:73254816-73254840_-	mmu-miR-151-3p	chr15:73254819-73254840_-	21	24	73254840	73254816	-	Yes	No	505	902	1699	1929	82.3567	121.503	187.821	222.754
chr15:73254817-73254838_-	mmu-miR-151-3p	chr15:73254819-73254840_-	21	21	73254838	73254817	-	No	No	6	0	11	3	0.978496	0	1.21603	0.346429
chr15:73254817-73254839_-	mmu-miR-151-3p	chr15:73254819-73254840_-	21	22	73254839	73254817	-	No	No	80	106	274	346	13.0466	14.2786	30.2901	39.9548
chr15:73254817-73254840_-	mmu-miR-151-3p	chr15:73254819-73254840_-	21	23	73254840	73254817	-	Yes	No	1627	3567	5479	6633	265.335	480.49	605.692	765.955
chr15:73254817-73254841_-	mmu-miR-151-3p	chr15:73254819-73254840_-	21	24	73254841	73254817	-	No	No	0	25	28	27	0	3.3676	3.09534	3.11786
chr15:73254818-73254839_-	mmu-miR-151-3p	chr15:73254819-73254840_-	21	21	73254839	73254818	-	No	No	56	253	243	327	9.13263	34.0801	26.8631	37.7608
chr15:73254818-73254840_-	mmu-miR-151-3p	chr15:73254819-73254840_-	21	22	73254840	73254818	-	Yes	No	2240	5042	7660	9497	365.305	679.178	846.797	1096.68
chr15:73254818-73254841_-	mmu-miR-151-3p	chr15:73254819-73254840_-	21	23	73254841	73254818	-	No	No	22	48	142	128	3.58782	6.4658	15.6978	14.781
chr15:73254818-73254842_-	mmu-miR-151-3p	chr15:73254819-73254840_-	21	24	73254842	73254818	-	No	No	13	18	25	13	2.12007	2.42467	2.7637	1.50119
chr15:73254819-73254839_-	mmu-miR-151-3p	chr15:73254819-73254840_-	21	20	73254839	73254819	-	No	Yes	132	258	362	322	21.5269	34.7537	40.0183	37.1834
chr15:73254819-73254840_-	mmu-miR-151-3p	chr15:73254819-73254840_-	21	21	73254840	73254819	-	Yes	Yes	4399	8613	13679	13641	717.4	1160.21	1512.18	1575.21
chr15:73254819-73254841_-	mmu-miR-151-3p	chr15:73254819-73254840_-	21	22	73254841	73254819	-	No	Yes	55	158	222	366	8.96954	21.2832	24.5416	42.2644
chr15:73254819-73254842_-	mmu-miR-151-3p	chr15:73254819-73254840_-	21	23	73254842	73254819	-	No	Yes	45	100	158	151	7.33872	13.4704	17.4666	17.4369
chr15:73254820-73254839_-	mmu-miR-151-3p	chr15:73254819-73254840_-	21	19	73254839	73254820	-	No	No	27	54	41	173	4.40323	7.27402	4.53246	19.9774
chr15:73254820-73254840_-	mmu-miR-151-3p	chr15:73254819-73254840_-	21	20	73254840	73254820	-	Yes	No	947	3003	3020	5265	154.439	404.516	333.855	607.983
chr15:73254820-73254841_-	mmu-miR-151-3p	chr15:73254819-73254840_-	21	21	73254841	73254820	-	No	No	45	115	130	239	7.33872	15.491	14.3712	27.5989
chr15:73254820-73254842_-	mmu-miR-151-3p	chr15:73254819-73254840_-	21	22	73254842	73254820	-	No	No	70	226	287	276	11.4158	30.4431	31.7272	31.8715
chr15:73254821-73254839_-	mmu-miR-151-3p	chr15:73254819-73254840_-	21	18	73254839	73254821	-	No	No	3	14	9	39	0.489248	1.88586	0.994931	4.50358
chr15:73254821-73254840_-	mmu-miR-151-3p	chr15:73254819-73254840_-	21	19	73254840	73254821	-	Yes	No	180	568	522	1032	29.3549	76.5119	57.706	119.172
chr15:73254821-73254841_-	mmu-miR-151-3p	chr15:73254819-73254840_-	21	20	73254841	73254821	-	No	No	8	10	21	28	1.30466	1.34704	2.3215	3.23334
chr15:73254821-73254842_-	mmu-miR-151-3p	chr15:73254819-73254840_-	21	21	73254842	73254821	-	No	No	18	87	35	103	2.93549	11.7193	3.86917	11.8941
chr15:73254822-73254840_-	mmu-miR-151-3p	chr15:73254819-73254840_-	21	18	73254840	73254822	-	Yes	No	37	112	16	311	6.03406	15.0869	1.76877	35.9132
chr15:73254822-73254841_-	mmu-miR-151-3p	chr15:73254819-73254840_-	21	19	73254841	73254822	-	No	No	0	2	5	17	0	0.269408	0.552739	1.9631
chr15:73254822-73254842_-	mmu-miR-151-3p	chr15:73254819-73254840_-	21	20	73254842	73254822	-	No	No	2	9	0	27	0.326165	1.21234	0	3.11786
chr15:73254824-73254842_-	mmu-miR-151-3p	chr15:73254819-73254840_-	21	18	73254842	73254824	-	No	No	2	2	0	16	0.326165	0.269408	0	1.84762
chr15:73254850-73254875_-	mmu-miR-151-5p	chr15:73254854-73254875_-	21	25	73254875	73254850	-	Yes	No	0	2	0	12	0	0.269408	0	1.38572
chr15:73254851-73254875_-	mmu-miR-151-5p	chr15:73254854-73254875_-	21	24	73254875	73254851	-	Yes	No	17	13	29	28	2.7724	1.75115	3.20589	3.23334
chr15:73254852-73254874_-	mmu-miR-151-5p	chr15:73254854-73254875_-	21	22	73254874	73254852	-	No	No	2	5	7	8	0.326165	0.673521	0.773835	0.923811
chr15:73254852-73254875_-	mmu-miR-151-5p	chr15:73254854-73254875_-	21	23	73254875	73254852	-	Yes	No	124	228	494	373	20.2222	30.7125	54.6106	43.0727
chr15:73254853-73254873_-	mmu-miR-151-5p	chr15:73254854-73254875_-	21	20	73254873	73254853	-	No	No	0	12	11	6	0	1.61645	1.21603	0.692859
chr15:73254853-73254874_-	mmu-miR-151-5p	chr15:73254854-73254875_-	21	21	73254874	73254853	-	No	No	5	9	11	20	0.815413	1.21234	1.21603	2.30953
chr15:73254853-73254875_-	mmu-miR-151-5p	chr15:73254854-73254875_-	21	22	73254875	73254853	-	Yes	No	659	1173	1714	1605	107.471	158.008	189.479	185.34
chr15:73254853-73254876_-	mmu-miR-151-5p	chr15:73254854-73254875_-	21	23	73254876	73254853	-	No	No	2	29	5	29	0.326165	3.90642	0.552739	3.34882
chr15:73254854-73254874_-	mmu-miR-151-5p	chr15:73254854-73254875_-	21	20	73254874	73254854	-	No	Yes	4	21	25	55	0.65233	2.82879	2.7637	6.3512
chr15:73254854-73254875_-	mmu-miR-151-5p	chr15:73254854-73254875_-	21	21	73254875	73254854	-	Yes	Yes	1541	3336	5068	6013	251.31	449.373	560.257	694.36
chr15:73254854-73254876_-	mmu-miR-151-5p	chr15:73254854-73254875_-	21	22	73254876	73254854	-	No	Yes	5	14	73	52	0.815413	1.88586	8.06999	6.00477
chr15:73254854-73254877_-	mmu-miR-151-5p	chr15:73254854-73254875_-	21	23	73254877	73254854	-	No	Yes	0	0	21	5	0	0	2.3215	0.577382
chr15:73254855-73254875_-	mmu-miR-151-5p	chr15:73254854-73254875_-	21	20	73254875	73254855	-	Yes	No	88	203	45	312	14.3513	27.3449	4.97465	36.0286
chr15:73254856-73254875_-	mmu-miR-151-5p	chr15:73254854-73254875_-	21	19	73254875	73254856	-	Yes	No	0	4	0	18	0	0.538816	0	2.07858
chr15:73254857-73254875_-	mmu-miR-151-5p	chr15:73254854-73254875_-	21	18	73254875	73254857	-	Yes	No	3	3	3	13	0.489248	0.404112	0.331644	1.50119
chr11:96850437-96850459_+	mmu-miR-152-3p	chr11:96850438-96850459_+	21	22	96850437	96850459	+	No	Yes	12	1	5	4	1.95699	0.134704	0.552739	0.461906
chr11:96850438-96850456_+	mmu-miR-152-3p	chr11:96850438-96850459_+	21	18	96850438	96850456	+	Yes	No	76	74	3	87	12.3943	9.9681	0.331644	10.0464
chr11:96850438-96850458_+	mmu-miR-152-3p	chr11:96850438-96850459_+	21	20	96850438	96850458	+	Yes	No	2	27	13	19	0.326165	3.63701	1.43712	2.19405
chr11:96850438-96850459_+	mmu-miR-152-3p	chr11:96850438-96850459_+	21	21	96850438	96850459	+	Yes	Yes	1861	1903	1981	1349	303.497	256.342	218.995	155.778
chr11:96850438-96850460_+	mmu-miR-152-3p	chr11:96850438-96850459_+	21	22	96850438	96850460	+	Yes	No	594	661	823	617	96.8711	89.0394	90.9809	71.249
chr11:96850438-96850461_+	mmu-miR-152-3p	chr11:96850438-96850459_+	21	23	96850438	96850461	+	Yes	No	227	246	243	241	37.0197	33.1372	26.8631	27.8298
chr11:96850438-96850462_+	mmu-miR-152-3p	chr11:96850438-96850459_+	21	24	96850438	96850462	+	Yes	No	29	12	18	18	4.7294	1.61645	1.98986	2.07858
chr11:96850439-96850459_+	mmu-miR-152-3p	chr11:96850438-96850459_+	21	20	96850439	96850459	+	No	Yes	34	43	24	36	5.54481	5.79228	2.65315	4.15715
chr11:96850439-96850460_+	mmu-miR-152-3p	chr11:96850438-96850459_+	21	21	96850439	96850460	+	No	No	10	17	18	9	1.63083	2.28997	1.98986	1.03929
chr11:96850399-96850423_+	mmu-miR-152-5p	chr11:96850399-96850423_+	24	24	96850399	96850423	+	Yes	Yes	406	273	505	249	66.2115	36.7742	55.8267	28.7536
chr11:96850400-96850423_+	mmu-miR-152-5p	chr11:96850399-96850423_+	24	23	96850400	96850423	+	No	Yes	108	103	101	66	17.6129	13.8745	11.1653	7.62144
chr11:96850400-96850425_+	mmu-miR-152-5p	chr11:96850399-96850423_+	24	25	96850400	96850425	+	No	No	6	9	6	4	0.978496	1.21234	0.663287	0.461906
chr16:84714181-84714200_+	mmu-miR-155-3p	chr16:84714181-84714202_+	21	19	84714181	84714200	+	Yes	No	0	10	0	0	0	1.34704	0	0
chr16:84714181-84714201_+	mmu-miR-155-3p	chr16:84714181-84714202_+	21	20	84714181	84714201	+	Yes	No	0	28	0	0	0	3.77171	0	0
chr16:84714181-84714202_+	mmu-miR-155-3p	chr16:84714181-84714202_+	21	21	84714181	84714202	+	Yes	Yes	4	77	0	0	0.65233	10.3722	0	0
chr16:84714181-84714203_+	mmu-miR-155-3p	chr16:84714181-84714202_+	21	22	84714181	84714203	+	Yes	No	292	2232	1	0	47.6201	300.66	0.110548	0
chr16:84714181-84714204_+	mmu-miR-155-3p	chr16:84714181-84714202_+	21	23	84714181	84714204	+	Yes	No	14	10	0	0	2.28316	1.34704	0	0
chr16:84714182-84714203_+	mmu-miR-155-3p	chr16:84714181-84714202_+	21	21	84714182	84714203	+	No	No	20	91	0	0	3.26165	12.2581	0	0
chr16:84714139-84714164_+	mmu-miR-155-5p	chr16:84714142-84714165_+	23	25	84714139	84714164	+	No	No	0	10	0	0	0	1.34704	0	0
chr16:84714139-84714165_+	mmu-miR-155-5p	chr16:84714142-84714165_+	23	26	84714139	84714165	+	No	Yes	7	31	0	0	1.14158	4.17583	0	0
chr16:84714140-84714165_+	mmu-miR-155-5p	chr16:84714142-84714165_+	23	25	84714140	84714165	+	No	Yes	0	21	0	0	0	2.82879	0	0
chr16:84714141-84714163_+	mmu-miR-155-5p	chr16:84714142-84714165_+	23	22	84714141	84714163	+	No	No	1	8	0	0	0.163083	1.07763	0	0
chr16:84714141-84714164_+	mmu-miR-155-5p	chr16:84714142-84714165_+	23	23	84714141	84714164	+	No	No	2	17	0	0	0.326165	2.28997	0	0
chr16:84714141-84714165_+	mmu-miR-155-5p	chr16:84714142-84714165_+	23	24	84714141	84714165	+	No	Yes	8	82	0	0	1.30466	11.0457	0	0
chr16:84714141-84714166_+	mmu-miR-155-5p	chr16:84714142-84714165_+	23	25	84714141	84714166	+	No	No	3	26	0	0	0.489248	3.50231	0	0
chr16:84714141-84714167_+	mmu-miR-155-5p	chr16:84714142-84714165_+	23	26	84714141	84714167	+	No	No	3	16	0	0	0.489248	2.15527	0	0
chr16:84714142-84714160_+	mmu-miR-155-5p	chr16:84714142-84714165_+	23	18	84714142	84714160	+	Yes	No	12	102	0	0	1.95699	13.7398	0	0
chr16:84714142-84714161_+	mmu-miR-155-5p	chr16:84714142-84714165_+	23	19	84714142	84714161	+	Yes	No	155	1222	0	0	25.2778	164.608	0	0
chr16:84714142-84714162_+	mmu-miR-155-5p	chr16:84714142-84714165_+	23	20	84714142	84714162	+	Yes	No	382	2336	0	0	62.2976	314.669	0	0
chr16:84714142-84714163_+	mmu-miR-155-5p	chr16:84714142-84714165_+	23	21	84714142	84714163	+	Yes	No	1695	9819	1	1	276.425	1322.66	0.110548	0.115476
chr16:84714142-84714164_+	mmu-miR-155-5p	chr16:84714142-84714165_+	23	22	84714142	84714164	+	Yes	No	8636	60862	5	7	1408.38	8198.36	0.552739	0.808335
chr16:84714142-84714165_+	mmu-miR-155-5p	chr16:84714142-84714165_+	23	23	84714142	84714165	+	Yes	Yes	23677	195926	37	29	3861.31	26392	4.09027	3.34882
chr16:84714142-84714166_+	mmu-miR-155-5p	chr16:84714142-84714165_+	23	24	84714142	84714166	+	Yes	No	7507	76034	6	6	1224.26	10242.1	0.663287	0.692859
chr16:84714142-84714167_+	mmu-miR-155-5p	chr16:84714142-84714165_+	23	25	84714142	84714167	+	Yes	No	1734	13173	0	3	282.785	1774.46	0	0.346429
chr16:84714142-84714168_+	mmu-miR-155-5p	chr16:84714142-84714165_+	23	26	84714142	84714168	+	Yes	No	290	1547	0	0	47.294	208.387	0	0
chr16:84714142-84714169_+	mmu-miR-155-5p	chr16:84714142-84714165_+	23	27	84714142	84714169	+	Yes	No	36	166	0	0	5.87097	22.3609	0	0
chr16:84714142-84714170_+	mmu-miR-155-5p	chr16:84714142-84714165_+	23	28	84714142	84714170	+	Yes	No	3	22	0	0	0.489248	2.96349	0	0
chr16:84714143-84714161_+	mmu-miR-155-5p	chr16:84714142-84714165_+	23	18	84714143	84714161	+	No	No	5	35	0	0	0.815413	4.71464	0	0
chr16:84714143-84714162_+	mmu-miR-155-5p	chr16:84714142-84714165_+	23	19	84714143	84714162	+	No	No	11	48	0	0	1.79391	6.4658	0	0
chr16:84714143-84714163_+	mmu-miR-155-5p	chr16:84714142-84714165_+	23	20	84714143	84714163	+	No	No	54	274	0	0	8.80646	36.9089	0	0
chr16:84714143-84714164_+	mmu-miR-155-5p	chr16:84714142-84714165_+	23	21	84714143	84714164	+	No	No	190	1558	0	0	30.9857	209.869	0	0
chr16:84714143-84714165_+	mmu-miR-155-5p	chr16:84714142-84714165_+	23	22	84714143	84714165	+	No	Yes	555	4239	1	0	90.5108	571.011	0.110548	0
chr16:84714143-84714166_+	mmu-miR-155-5p	chr16:84714142-84714165_+	23	23	84714143	84714166	+	No	No	192	2094	1	0	31.3119	282.07	0.110548	0
chr16:84714143-84714167_+	mmu-miR-155-5p	chr16:84714142-84714165_+	23	24	84714143	84714167	+	No	No	105	554	0	0	17.1237	74.6261	0	0
chr16:84714143-84714168_+	mmu-miR-155-5p	chr16:84714142-84714165_+	23	25	84714143	84714168	+	No	No	22	53	0	0	3.58782	7.13932	0	0
chr16:84714144-84714164_+	mmu-miR-155-5p	chr16:84714142-84714165_+	23	20	84714144	84714164	+	No	No	2	17	0	0	0.326165	2.28997	0	0
chr16:84714144-84714165_+	mmu-miR-155-5p	chr16:84714142-84714165_+	23	21	84714144	84714165	+	No	Yes	12	172	0	0	1.95699	23.1691	0	0
chr16:84714144-84714166_+	mmu-miR-155-5p	chr16:84714142-84714165_+	23	22	84714144	84714166	+	No	No	12	83	0	0	1.95699	11.1804	0	0
chr16:84714145-84714166_+	mmu-miR-155-5p	chr16:84714142-84714165_+	23	21	84714145	84714166	+	No	No	0	10	0	0	0	1.34704	0	0
chr16:84714146-84714165_+	mmu-miR-155-5p	chr16:84714142-84714165_+	23	19	84714146	84714165	+	No	Yes	0	34	0	0	0	4.57994	0	0
chr16:84714147-84714165_+	mmu-miR-155-5p	chr16:84714142-84714165_+	23	18	84714147	84714165	+	No	Yes	0	14	0	0	0	1.88586	0	0
chr16:84714147-84714167_+	mmu-miR-155-5p	chr16:84714142-84714165_+	23	20	84714147	84714167	+	No	No	0	12	0	0	0	1.61645	0	0
chr16:84714148-84714166_+	mmu-miR-155-5p	chr16:84714142-84714165_+	23	18	84714148	84714166	+	No	No	1	37	0	0	0.163083	4.98405	0	0
chr16:84714148-84714168_+	mmu-miR-155-5p	chr16:84714142-84714165_+	23	20	84714148	84714168	+	No	No	0	8	0	0	0	1.07763	0	0
chr14:61632036-61632059_-	mmu-miR-15a-3p	chr14:61632037-61632059_-	22	23	61632059	61632036	-	Yes	No	0	9	0	0	0	1.21234	0	0
chr14:61632037-61632059_-	mmu-miR-15a-3p	chr14:61632037-61632059_-	22	22	61632059	61632037	-	Yes	Yes	1	13	29	16	0.163083	1.75115	3.20589	1.84762
chr14:61632038-61632059_-	mmu-miR-15a-3p	chr14:61632037-61632059_-	22	21	61632059	61632038	-	Yes	No	14	9	9	12	2.28316	1.21234	0.994931	1.38572
chr14:61632039-61632059_-	mmu-miR-15a-3p	chr14:61632037-61632059_-	22	20	61632059	61632039	-	Yes	No	5	8	2	20	0.815413	1.07763	0.221096	2.30953
chr14:61632071-61632096_-	mmu-miR-15a-5p	chr14:61632074-61632096_-	22	25	61632096	61632071	-	Yes	No	14	10	37	11	2.28316	1.34704	4.09027	1.27024
chr14:61632072-61632096_-	mmu-miR-15a-5p	chr14:61632074-61632096_-	22	24	61632096	61632072	-	Yes	No	47	47	63	24	7.66488	6.33109	6.96451	2.77143
chr14:61632073-61632095_-	mmu-miR-15a-5p	chr14:61632074-61632096_-	22	22	61632095	61632073	-	No	No	5	8	7	17	0.815413	1.07763	0.773835	1.9631
chr14:61632073-61632096_-	mmu-miR-15a-5p	chr14:61632074-61632096_-	22	23	61632096	61632073	-	Yes	No	247	290	398	335	40.2814	39.0642	43.998	38.6846
chr14:61632074-61632095_-	mmu-miR-15a-5p	chr14:61632074-61632096_-	22	21	61632095	61632074	-	No	Yes	5	4	9	8	0.815413	0.538816	0.994931	0.923811
chr14:61632074-61632096_-	mmu-miR-15a-5p	chr14:61632074-61632096_-	22	22	61632096	61632074	-	Yes	Yes	512	455	778	480	83.4983	61.2904	86.0062	55.4287
chr14:61632075-61632095_-	mmu-miR-15a-5p	chr14:61632074-61632096_-	22	20	61632095	61632075	-	No	No	4	4	14	18	0.65233	0.538816	1.54767	2.07858
chr14:61632075-61632096_-	mmu-miR-15a-5p	chr14:61632074-61632096_-	22	21	61632096	61632075	-	Yes	No	753	1044	1240	1121	122.801	140.631	137.079	129.449
chr14:61632075-61632097_-	mmu-miR-15a-5p	chr14:61632074-61632096_-	22	22	61632097	61632075	-	No	No	9	3	3	0	1.46774	0.404112	0.331644	0
chr14:61632076-61632096_-	mmu-miR-15a-5p	chr14:61632074-61632096_-	22	20	61632096	61632076	-	Yes	No	167	282	120	365	27.2348	37.9866	13.2657	42.1489
chr14:61632078-61632096_-	mmu-miR-15a-5p	chr14:61632074-61632096_-	22	18	61632096	61632078	-	Yes	No	11	35	3	12	1.79391	4.71464	0.331644	1.38572
chr3:69009812-69009831_+	mmu-miR-15b-3p	chr3:69009812-69009834_+	22	19	69009812	69009831	+	Yes	No	0	19	0	20	0	2.55938	0	2.30953
chr3:69009812-69009832_+	mmu-miR-15b-3p	chr3:69009812-69009834_+	22	20	69009812	69009832	+	Yes	No	28	28	14	58	4.56631	3.77171	1.54767	6.69763
chr3:69009812-69009833_+	mmu-miR-15b-3p	chr3:69009812-69009834_+	22	21	69009812	69009833	+	Yes	No	55	37	118	61	8.96954	4.98405	13.0446	7.04406
chr3:69009812-69009834_+	mmu-miR-15b-3p	chr3:69009812-69009834_+	22	22	69009812	69009834	+	Yes	Yes	18	19	107	16	2.93549	2.55938	11.8286	1.84762
chr3:69009812-69009835_+	mmu-miR-15b-3p	chr3:69009812-69009834_+	22	23	69009812	69009835	+	Yes	No	12	8	118	9	1.95699	1.07763	13.0446	1.03929
chr3:69009773-69009796_+	mmu-miR-15b-5p	chr3:69009774-69009796_+	22	23	69009773	69009796	+	No	Yes	10	9	19	0	1.63083	1.21234	2.10041	0
chr3:69009774-69009794_+	mmu-miR-15b-5p	chr3:69009774-69009796_+	22	20	69009774	69009794	+	Yes	No	10	30	8	20	1.63083	4.04112	0.884383	2.30953
chr3:69009774-69009795_+	mmu-miR-15b-5p	chr3:69009774-69009796_+	22	21	69009774	69009795	+	Yes	No	338	401	458	365	55.1219	54.0163	50.6309	42.1489
chr3:69009774-69009796_+	mmu-miR-15b-5p	chr3:69009774-69009796_+	22	22	69009774	69009796	+	Yes	Yes	2921	2249	4130	2585	476.364	302.95	456.563	298.507
chr3:69009774-69009797_+	mmu-miR-15b-5p	chr3:69009774-69009796_+	22	23	69009774	69009797	+	Yes	No	22	30	19	38	3.58782	4.04112	2.10041	4.3881
chr3:69009775-69009795_+	mmu-miR-15b-5p	chr3:69009774-69009796_+	22	20	69009775	69009795	+	No	No	7	6	6	12	1.14158	0.808225	0.663287	1.38572
chr3:69009775-69009796_+	mmu-miR-15b-5p	chr3:69009774-69009796_+	22	21	69009775	69009796	+	No	Yes	52	38	71	60	8.4803	5.11876	7.8489	6.92859
chr3:69009776-69009796_+	mmu-miR-15b-5p	chr3:69009774-69009796_+	22	20	69009776	69009796	+	No	Yes	17	10	10	5	2.7724	1.34704	1.10548	0.577382
chr14:61631890-61631915_-	mmu-miR-16-1-3p	chr14:61631893-61631915_-	22	25	61631915	61631890	-	Yes	No	8	0	7	0	1.30466	0	0.773835	0
chr14:61631891-61631915_-	mmu-miR-16-1-3p	chr14:61631893-61631915_-	22	24	61631915	61631891	-	Yes	No	29	27	45	23	4.7294	3.63701	4.97465	2.65596
chr14:61631891-61631916_-	mmu-miR-16-1-3p	chr14:61631893-61631915_-	22	25	61631916	61631891	-	No	No	2	5	9	0	0.326165	0.673521	0.994931	0
chr14:61631892-61631914_-	mmu-miR-16-1-3p	chr14:61631893-61631915_-	22	22	61631914	61631892	-	No	No	8	0	14	0	1.30466	0	1.54767	0
chr14:61631892-61631915_-	mmu-miR-16-1-3p	chr14:61631893-61631915_-	22	23	61631915	61631892	-	Yes	No	228	112	565	70	37.1828	15.0869	62.4595	8.08335
chr14:61631892-61631916_-	mmu-miR-16-1-3p	chr14:61631893-61631915_-	22	24	61631916	61631892	-	No	No	9	0	0	0	1.46774	0	0	0
chr14:61631893-61631915_-	mmu-miR-16-1-3p	chr14:61631893-61631915_-	22	22	61631915	61631893	-	Yes	Yes	20	39	54	9	3.26165	5.25346	5.96958	1.03929
chr14:61631893-61631916_-	mmu-miR-16-1-3p	chr14:61631893-61631915_-	22	23	61631916	61631893	-	No	Yes	20	7	42	3	3.26165	0.942929	4.64301	0.346429
chr14:61631893-61631917_-	mmu-miR-16-1-3p	chr14:61631893-61631915_-	22	24	61631917	61631893	-	No	Yes	0	8	4	3	0	1.07763	0.442191	0.346429
chr14:61631894-61631915_-	mmu-miR-16-1-3p	chr14:61631893-61631915_-	22	21	61631915	61631894	-	Yes	No	10	9	10	0	1.63083	1.21234	1.10548	0
chr14:61631894-61631916_-	mmu-miR-16-1-3p	chr14:61631893-61631915_-	22	22	61631916	61631894	-	No	No	2	4	31	12	0.326165	0.538816	3.42698	1.38572
chr14:61631894-61631917_-	mmu-miR-16-1-3p	chr14:61631893-61631915_-	22	23	61631917	61631894	-	No	No	0	10	19	5	0	1.34704	2.10041	0.577382
chr14:61631895-61631915_-	mmu-miR-16-1-3p	chr14:61631893-61631915_-	22	20	61631915	61631895	-	Yes	No	7	7	20	11	1.14158	0.942929	2.21096	1.27024
chr14:61631895-61631916_-	mmu-miR-16-1-3p	chr14:61631893-61631915_-	22	21	61631916	61631895	-	No	No	23	36	51	15	3.7509	4.84935	5.63794	1.73215
chr14:61631896-61631915_-	mmu-miR-16-1-3p	chr14:61631893-61631915_-	22	19	61631915	61631896	-	Yes	No	13	9	0	5	2.12007	1.21234	0	0.577382
chr14:61631897-61631919_-	mmu-miR-16-1-3p	chr14:61631893-61631915_-	22	22	61631919	61631897	-	No	No	0	0	0	12	0	0	0	1.38572
chr3:69009959-69009980_+	mmu-miR-16-2-3p	chr3:69009959-69009981_+	22	21	69009959	69009980	+	Yes	No	21	25	4	49	3.42473	3.3676	0.442191	5.65835
chr3:69009959-69009981_+	mmu-miR-16-2-3p	chr3:69009959-69009981_+	22	22	69009959	69009981	+	Yes	Yes	130	94	176	119	21.2007	12.6622	19.4564	13.7417
chr3:69009959-69009982_+	mmu-miR-16-2-3p	chr3:69009959-69009981_+	22	23	69009959	69009982	+	Yes	No	9	4	24	19	1.46774	0.538816	2.65315	2.19405
chr3:69009960-69009981_+	mmu-miR-16-2-3p	chr3:69009959-69009981_+	22	21	69009960	69009981	+	No	Yes	6	5	57	13	0.978496	0.673521	6.30123	1.50119
chr3:69009960-69009982_+	mmu-miR-16-2-3p	chr3:69009959-69009981_+	22	22	69009960	69009982	+	No	No	5	0	26	8	0.815413	0	2.87424	0.923811
chr3:69009914-69009938_+	mmu-miR-16-5p	chr3:69009917-69009939_+	22	24	69009914	69009938	+	No	No	0	9	8	7	0	1.21234	0.884383	0.808335
chr3:69009914-69009939_+	mmu-miR-16-5p	chr3:69009917-69009939_+	22	25	69009914	69009939	+	No	Yes	2	6	23	1	0.326165	0.808225	2.5426	0.115476
chr3:69009915-69009939_+	mmu-miR-16-5p	chr3:69009917-69009939_+	22	24	69009915	69009939	+	No	Yes	11	3	0	10	1.79391	0.404112	0	1.15476
chr3:69009916-69009938_+	mmu-miR-16-5p	chr3:69009917-69009939_+	22	22	69009916	69009938	+	No	No	11	22	34	14	1.79391	2.96349	3.75863	1.61667
chr3:69009916-69009939_+	mmu-miR-16-5p	chr3:69009917-69009939_+	22	23	69009916	69009939	+	No	Yes	49	89	106	43	7.99105	11.9887	11.7181	4.96549
chr3:69009916-69009940_+	mmu-miR-16-5p	chr3:69009917-69009939_+	22	24	69009916	69009940	+	No	No	0	0	12	1	0	0	1.32657	0.115476
chr3:69009917-69009936_+	mmu-miR-16-5p	chr3:69009917-69009939_+	22	19	69009917	69009936	+	Yes	No	12	47	23	26	1.95699	6.33109	2.5426	3.00239
chr3:69009917-69009937_+	mmu-miR-16-5p	chr3:69009917-69009939_+	22	20	69009917	69009937	+	Yes	No	242	459	204	317	39.466	61.8292	22.5518	36.606
chr3:69009917-69009938_+	mmu-miR-16-5p	chr3:69009917-69009939_+	22	21	69009917	69009938	+	Yes	No	13063	16030	21725	17120	2130.35	2159.31	2401.65	1976.96
chr3:69009917-69009939_+	mmu-miR-16-5p	chr3:69009917-69009939_+	22	22	69009917	69009939	+	Yes	Yes	30250	29904	49191	32108	4933.25	4028.19	5437.96	3707.72
chr3:69009917-69009940_+	mmu-miR-16-5p	chr3:69009917-69009939_+	22	23	69009917	69009940	+	Yes	No	1091	1356	1808	1188	177.923	182.659	199.871	137.186
chr3:69009917-69009941_+	mmu-miR-16-5p	chr3:69009917-69009939_+	22	24	69009917	69009941	+	Yes	No	46	36	77	37	7.5018	4.84935	8.51218	4.27263
chr3:69009917-69009942_+	mmu-miR-16-5p	chr3:69009917-69009939_+	22	25	69009917	69009942	+	Yes	No	14	25	41	33	2.28316	3.3676	4.53246	3.81072
chr3:69009918-69009937_+	mmu-miR-16-5p	chr3:69009917-69009939_+	22	19	69009918	69009937	+	No	No	7	10	2	14	1.14158	1.34704	0.221096	1.61667
chr3:69009918-69009938_+	mmu-miR-16-5p	chr3:69009917-69009939_+	22	20	69009918	69009938	+	No	No	369	395	558	550	60.1775	53.2081	61.6857	63.512
chr3:69009918-69009939_+	mmu-miR-16-5p	chr3:69009917-69009939_+	22	21	69009918	69009939	+	No	Yes	776	815	957	1051	126.552	109.784	105.794	121.366
chr3:69009918-69009940_+	mmu-miR-16-5p	chr3:69009917-69009939_+	22	22	69009918	69009940	+	No	No	45	32	48	33	7.33872	4.31053	5.3063	3.81072
chr3:69009919-69009938_+	mmu-miR-16-5p	chr3:69009917-69009939_+	22	19	69009919	69009938	+	No	No	47	39	36	82	7.66488	5.25346	3.97972	9.46907
chr3:69009919-69009939_+	mmu-miR-16-5p	chr3:69009917-69009939_+	22	20	69009919	69009939	+	No	Yes	114	81	155	146	18.5914	10.911	17.1349	16.8596
chr3:69009919-69009940_+	mmu-miR-16-5p	chr3:69009917-69009939_+	22	21	69009919	69009940	+	No	No	1	4	12	11	0.163083	0.538816	1.32657	1.27024
chr14:115043720-115043739_+	mmu-miR-17-3p	chr14:115043720-115043742_+	22	19	115043720	115043739	+	Yes	No	71	46	0	133	11.5789	6.19639	0	15.3584
chr14:115043720-115043740_+	mmu-miR-17-3p	chr14:115043720-115043742_+	22	20	115043720	115043740	+	Yes	No	22	27	11	45	3.58782	3.63701	1.21603	5.19644
chr14:115043720-115043741_+	mmu-miR-17-3p	chr14:115043720-115043742_+	22	21	115043720	115043741	+	Yes	No	15	42	84	72	2.44624	5.65757	9.28602	8.3143
chr14:115043720-115043742_+	mmu-miR-17-3p	chr14:115043720-115043742_+	22	22	115043720	115043742	+	Yes	Yes	107	85	122	77	17.4498	11.4498	13.4868	8.89169
chr14:115043720-115043743_+	mmu-miR-17-3p	chr14:115043720-115043742_+	22	23	115043720	115043743	+	Yes	No	69	48	175	61	11.2527	6.4658	19.3459	7.04406
chr14:115043720-115043744_+	mmu-miR-17-3p	chr14:115043720-115043742_+	22	24	115043720	115043744	+	Yes	No	7	9	18	12	1.14158	1.21234	1.98986	1.38572
chr14:115043720-115043745_+	mmu-miR-17-3p	chr14:115043720-115043742_+	22	25	115043720	115043745	+	Yes	No	0	0	10	5	0	0	1.10548	0.577382
chr14:115043721-115043742_+	mmu-miR-17-3p	chr14:115043720-115043742_+	22	21	115043721	115043742	+	No	Yes	7	3	9	10	1.14158	0.404112	0.994931	1.15476
chr14:115043721-115043743_+	mmu-miR-17-3p	chr14:115043720-115043742_+	22	22	115043721	115043743	+	No	No	0	13	29	11	0	1.75115	3.20589	1.27024
chr14:115043721-115043744_+	mmu-miR-17-3p	chr14:115043720-115043742_+	22	23	115043721	115043744	+	No	No	21	20	19	19	3.42473	2.69408	2.10041	2.19405
chr14:115043682-115043704_+	mmu-miR-17-5p	chr14:115043683-115043706_+	23	22	115043682	115043704	+	No	No	13	10	21	22	2.12007	1.34704	2.3215	2.54048
chr14:115043682-115043705_+	mmu-miR-17-5p	chr14:115043683-115043706_+	23	23	115043682	115043705	+	No	No	0	13	11	3	0	1.75115	1.21603	0.346429
chr14:115043682-115043706_+	mmu-miR-17-5p	chr14:115043683-115043706_+	23	24	115043682	115043706	+	No	Yes	30	0	27	9	4.89248	0	2.98479	1.03929
chr14:115043682-115043707_+	mmu-miR-17-5p	chr14:115043683-115043706_+	23	25	115043682	115043707	+	No	No	0	0	9	0	0	0	0.994931	0
chr14:115043683-115043703_+	mmu-miR-17-5p	chr14:115043683-115043706_+	23	20	115043683	115043703	+	Yes	No	188	273	4	307	30.6595	36.7742	0.442191	35.4513
chr14:115043683-115043704_+	mmu-miR-17-5p	chr14:115043683-115043706_+	23	21	115043683	115043704	+	Yes	No	37	43	44	72	6.03406	5.79228	4.86411	8.3143
chr14:115043683-115043705_+	mmu-miR-17-5p	chr14:115043683-115043706_+	23	22	115043683	115043705	+	Yes	No	78	77	53	98	12.7204	10.3722	5.85904	11.3167
chr14:115043683-115043706_+	mmu-miR-17-5p	chr14:115043683-115043706_+	23	23	115043683	115043706	+	Yes	Yes	1628	1689	2879	2208	265.498	227.515	318.267	254.972
chr14:115043683-115043707_+	mmu-miR-17-5p	chr14:115043683-115043706_+	23	24	115043683	115043707	+	Yes	No	320	352	497	430	52.1864	47.4158	54.9423	49.6549
chr14:115043683-115043708_+	mmu-miR-17-5p	chr14:115043683-115043706_+	23	25	115043683	115043708	+	Yes	No	6	2	25	3	0.978496	0.269408	2.7637	0.346429
chr14:115043684-115043703_+	mmu-miR-17-5p	chr14:115043683-115043706_+	23	19	115043684	115043703	+	No	No	10	13	0	13	1.63083	1.75115	0	1.50119
chr14:115043684-115043706_+	mmu-miR-17-5p	chr14:115043683-115043706_+	23	22	115043684	115043706	+	No	Yes	59	88	86	73	9.62187	11.854	9.50712	8.42978
chr14:115043684-115043707_+	mmu-miR-17-5p	chr14:115043683-115043706_+	23	23	115043684	115043707	+	No	No	6	11	17	14	0.978496	1.48175	1.87931	1.61667
chr1:137966506-137966526_+	mmu-miR-181a-1-3p	chr1:137966507-137966529_+	22	20	137966506	137966526	+	No	No	5	5	1	11	0.815413	0.673521	0.110548	1.27024
chr1:137966506-137966527_+	mmu-miR-181a-1-3p	chr1:137966507-137966529_+	22	21	137966506	137966527	+	No	No	2	12	0	16	0.326165	1.61645	0	1.84762
chr1:137966506-137966528_+	mmu-miR-181a-1-3p	chr1:137966507-137966529_+	22	22	137966506	137966528	+	No	No	48	34	108	34	7.82796	4.57994	11.9392	3.9262
chr1:137966506-137966529_+	mmu-miR-181a-1-3p	chr1:137966507-137966529_+	22	23	137966506	137966529	+	No	Yes	43	15	44	5	7.01255	2.02056	4.86411	0.577382
chr1:137966507-137966525_+	mmu-miR-181a-1-3p	chr1:137966507-137966529_+	22	18	137966507	137966525	+	Yes	No	2	2	0	25	0.326165	0.269408	0	2.88691
chr1:137966507-137966526_+	mmu-miR-181a-1-3p	chr1:137966507-137966529_+	22	19	137966507	137966526	+	Yes	No	99	148	112	286	16.1452	19.9362	12.3814	33.0263
chr1:137966507-137966527_+	mmu-miR-181a-1-3p	chr1:137966507-137966529_+	22	20	137966507	137966527	+	Yes	No	73	153	193	350	11.905	20.6097	21.3357	40.4168
chr1:137966507-137966528_+	mmu-miR-181a-1-3p	chr1:137966507-137966529_+	22	21	137966507	137966528	+	Yes	No	980	817	1587	1120	159.821	110.053	175.439	129.334
chr1:137966507-137966529_+	mmu-miR-181a-1-3p	chr1:137966507-137966529_+	22	22	137966507	137966529	+	Yes	Yes	14422	3503	15761	3167	2351.98	471.868	1742.34	365.714
chr1:137966507-137966530_+	mmu-miR-181a-1-3p	chr1:137966507-137966529_+	22	23	137966507	137966530	+	Yes	No	819	176	729	238	133.565	23.7079	80.5894	27.4834
chr1:137966507-137966531_+	mmu-miR-181a-1-3p	chr1:137966507-137966529_+	22	24	137966507	137966531	+	Yes	No	5	4	9	3	0.815413	0.538816	0.994931	0.346429
chr1:137966508-137966528_+	mmu-miR-181a-1-3p	chr1:137966507-137966529_+	22	20	137966508	137966528	+	No	No	9	14	12	31	1.46774	1.88586	1.32657	3.57977
chr1:137966508-137966529_+	mmu-miR-181a-1-3p	chr1:137966507-137966529_+	22	21	137966508	137966529	+	No	Yes	276	84	323	76	45.0108	11.3151	35.707	8.77621
chr1:137966508-137966530_+	mmu-miR-181a-1-3p	chr1:137966507-137966529_+	22	22	137966508	137966530	+	No	No	17	4	17	18	2.7724	0.538816	1.87931	2.07858
chr1:137966509-137966529_+	mmu-miR-181a-1-3p	chr1:137966507-137966529_+	22	20	137966509	137966529	+	No	Yes	24	11	40	7	3.91398	1.48175	4.42191	0.808335
chr1:137966510-137966529_+	mmu-miR-181a-1-3p	chr1:137966507-137966529_+	22	19	137966510	137966529	+	No	Yes	12	0	3	0	1.95699	0	0.331644	0
chr2:38852783-38852805_+	mmu-miR-181a-2-3p	chr2:38852784-38852806_+	22	22	38852783	38852805	+	No	No	9	7	7	3	1.46774	0.942929	0.773835	0.346429
chr2:38852784-38852804_+	mmu-miR-181a-2-3p	chr2:38852784-38852806_+	22	20	38852784	38852804	+	Yes	No	12	3	1	13	1.95699	0.404112	0.110548	1.50119
chr2:38852784-38852805_+	mmu-miR-181a-2-3p	chr2:38852784-38852806_+	22	21	38852784	38852805	+	Yes	No	136	123	146	111	22.1792	16.5686	16.14	12.8179
chr2:38852784-38852806_+	mmu-miR-181a-2-3p	chr2:38852784-38852806_+	22	22	38852784	38852806	+	Yes	Yes	233	51	209	82	37.9982	6.86991	23.1045	9.46907
chr2:38852784-38852807_+	mmu-miR-181a-2-3p	chr2:38852784-38852806_+	22	23	38852784	38852807	+	Yes	No	6	6	14	12	0.978496	0.808225	1.54767	1.38572
chr1:137966467-137966485_+	mmu-miR-181a-5p	chr1:137966467-137966490_+	23	18	137966467	137966485	+	Yes	No	403	670	78	1421	65.7223	90.2517	8.62273	164.092
chr1:137966467-137966486_+	mmu-miR-181a-5p	chr1:137966467-137966490_+	23	19	137966467	137966486	+	Yes	No	1164	1896	2287	3079	189.828	255.399	252.823	355.552
chr1:137966467-137966487_+	mmu-miR-181a-5p	chr1:137966467-137966490_+	23	20	137966467	137966487	+	Yes	No	906	1441	1727	2340	147.753	194.109	190.916	270.215
chr1:137966467-137966488_+	mmu-miR-181a-5p	chr1:137966467-137966490_+	23	21	137966467	137966488	+	Yes	No	6882	11563	15308	18742	1122.33	1557.58	1692.27	2164.26
chr1:137966467-137966489_+	mmu-miR-181a-5p	chr1:137966467-137966490_+	23	22	137966467	137966489	+	Yes	No	38803	69356	66279	101013	6328.09	9342.54	7327	11664.6
chr1:137966467-137966490_+	mmu-miR-181a-5p	chr1:137966467-137966490_+	23	23	137966467	137966490	+	Yes	Yes	128376	176023	226200	242988	20935.9	23711	25005.9	28059.4
chr1:137966467-137966491_+	mmu-miR-181a-5p	chr1:137966467-137966490_+	23	24	137966467	137966491	+	Yes	No	26177	22085	44055	26934	4269.01	2974.94	4870.19	3110.24
chr1:137966467-137966492_+	mmu-miR-181a-5p	chr1:137966467-137966490_+	23	25	137966467	137966492	+	Yes	No	22778	8476	38583	9999	3714.7	1141.75	4265.27	1154.65
chr1:137966467-137966493_+	mmu-miR-181a-5p	chr1:137966467-137966490_+	23	26	137966467	137966493	+	Yes	No	3437	1412	6301	1832	560.515	190.202	696.562	211.553
chr1:137966467-137966494_+	mmu-miR-181a-5p	chr1:137966467-137966490_+	23	27	137966467	137966494	+	Yes	No	148	37	308	72	24.1362	4.98405	34.0487	8.3143
chr1:137966467-137966495_+	mmu-miR-181a-5p	chr1:137966467-137966490_+	23	28	137966467	137966495	+	Yes	No	9	2	29	5	1.46774	0.269408	3.20589	0.577382
chr1:137966464-137966489_+	mmu-miR-181a-5p	chr1:137966467-137966490_+	23	25	137966464	137966489	+	No	No	2	0	4	12	0.326165	0	0.442191	1.38572
chr1:137966464-137966490_+	mmu-miR-181a-5p	chr1:137966467-137966490_+	23	26	137966464	137966490	+	No	Yes	11	21	18	34	1.79391	2.82879	1.98986	3.9262
chr1:137966465-137966489_+	mmu-miR-181a-5p	chr1:137966467-137966490_+	23	24	137966465	137966489	+	No	No	9	16	10	2	1.46774	2.15527	1.10548	0.230953
chr1:137966465-137966490_+	mmu-miR-181a-5p	chr1:137966467-137966490_+	23	25	137966465	137966490	+	No	Yes	22	7	8	14	3.58782	0.942929	0.884383	1.61667
chr1:137966465-137966491_+	mmu-miR-181a-5p	chr1:137966467-137966490_+	23	26	137966465	137966491	+	No	No	0	0	11	0	0	0	1.21603	0
chr1:137966466-137966488_+	mmu-miR-181a-5p	chr1:137966467-137966490_+	23	22	137966466	137966488	+	No	No	5	13	13	16	0.815413	1.75115	1.43712	1.84762
chr1:137966466-137966489_+	mmu-miR-181a-5p	chr1:137966467-137966490_+	23	23	137966466	137966489	+	No	No	4	34	22	41	0.65233	4.57994	2.43205	4.73453
chr1:137966466-137966490_+	mmu-miR-181a-5p	chr1:137966467-137966490_+	23	24	137966466	137966490	+	No	Yes	85	87	123	126	13.862	11.7193	13.5974	14.55
chr1:137966466-137966491_+	mmu-miR-181a-5p	chr1:137966467-137966490_+	23	25	137966466	137966491	+	No	No	7	14	19	5	1.14158	1.88586	2.10041	0.577382
chr1:137966466-137966492_+	mmu-miR-181a-5p	chr1:137966467-137966490_+	23	26	137966466	137966492	+	No	No	13	4	8	1	2.12007	0.538816	0.884383	0.115476
chr1:137966468-137966486_+	mmu-miR-181a-5p	chr1:137966467-137966490_+	23	18	137966468	137966486	+	No	No	13	8	22	47	2.12007	1.07763	2.43205	5.42739
chr1:137966468-137966487_+	mmu-miR-181a-5p	chr1:137966467-137966490_+	23	19	137966468	137966487	+	No	No	7	19	23	38	1.14158	2.55938	2.5426	4.3881
chr1:137966468-137966488_+	mmu-miR-181a-5p	chr1:137966467-137966490_+	23	20	137966468	137966488	+	No	No	57	119	137	200	9.29571	16.0298	15.1451	23.0953
chr1:137966468-137966489_+	mmu-miR-181a-5p	chr1:137966467-137966490_+	23	21	137966468	137966489	+	No	No	401	728	716	1260	65.3961	98.0646	79.1523	145.5
chr1:137966468-137966490_+	mmu-miR-181a-5p	chr1:137966467-137966490_+	23	22	137966468	137966490	+	No	Yes	1352	1892	2397	3054	220.488	254.86	264.983	352.665
chr1:137966468-137966491_+	mmu-miR-181a-5p	chr1:137966467-137966490_+	23	23	137966468	137966491	+	No	No	417	316	653	498	68.0054	42.5665	72.1877	57.5073
chr1:137966468-137966492_+	mmu-miR-181a-5p	chr1:137966467-137966490_+	23	24	137966468	137966492	+	No	No	350	152	650	208	57.0789	20.475	71.8561	24.0191
chr1:137966468-137966493_+	mmu-miR-181a-5p	chr1:137966467-137966490_+	23	25	137966468	137966493	+	No	No	43	14	83	31	7.01255	1.88586	9.17547	3.57977
chr1:137966469-137966489_+	mmu-miR-181a-5p	chr1:137966467-137966490_+	23	20	137966469	137966489	+	No	No	17	10	2	12	2.7724	1.34704	0.221096	1.38572
chr1:137966469-137966490_+	mmu-miR-181a-5p	chr1:137966467-137966490_+	23	21	137966469	137966490	+	No	Yes	29	22	32	52	4.7294	2.96349	3.53753	6.00477
chr1:137966469-137966491_+	mmu-miR-181a-5p	chr1:137966467-137966490_+	23	22	137966469	137966491	+	No	No	7	10	6	7	1.14158	1.34704	0.663287	0.808335
chr1:137966469-137966492_+	mmu-miR-181a-5p	chr1:137966467-137966490_+	23	23	137966469	137966492	+	No	No	11	4	9	0	1.79391	0.538816	0.994931	0
chr1:137966470-137966489_+	mmu-miR-181a-5p	chr1:137966467-137966490_+	23	19	137966470	137966489	+	No	No	21	40	34	52	3.42473	5.38816	3.75863	6.00477
chr1:137966470-137966490_+	mmu-miR-181a-5p	chr1:137966467-137966490_+	23	20	137966470	137966490	+	No	Yes	51	113	172	161	8.31721	15.2216	19.0142	18.5917
chr1:137966470-137966491_+	mmu-miR-181a-5p	chr1:137966467-137966490_+	23	21	137966470	137966491	+	No	No	4	7	7	17	0.65233	0.942929	0.773835	1.9631
chr1:137966470-137966492_+	mmu-miR-181a-5p	chr1:137966467-137966490_+	23	22	137966470	137966492	+	No	No	7	2	49	6	1.14158	0.269408	5.41684	0.692859
chr1:137966471-137966489_+	mmu-miR-181a-5p	chr1:137966467-137966490_+	23	18	137966471	137966489	+	No	No	93	189	198	414	15.1667	25.4591	21.8885	47.8072
chr1:137966471-137966490_+	mmu-miR-181a-5p	chr1:137966467-137966490_+	23	19	137966471	137966490	+	No	Yes	17	39	51	77	2.7724	5.25346	5.63794	8.89169
chr1:137966471-137966491_+	mmu-miR-181a-5p	chr1:137966467-137966490_+	23	20	137966471	137966491	+	No	No	9	1	7	4	1.46774	0.134704	0.773835	0.461906
chr1:137966472-137966490_+	mmu-miR-181a-5p	chr1:137966467-137966490_+	23	18	137966472	137966490	+	No	Yes	14	16	25	48	2.28316	2.15527	2.7637	5.54287
chr1:137966473-137966491_+	mmu-miR-181a-5p	chr1:137966467-137966490_+	23	18	137966473	137966491	+	No	No	0	0	9	1	0	0	0.994931	0.115476
chr1:137966689-137966709_+	mmu-miR-181b-1-3p	chr1:137966689-137966710_+	21	20	137966689	137966709	+	Yes	No	39	2	20	13	6.36022	0.269408	2.21096	1.50119
chr1:137966689-137966710_+	mmu-miR-181b-1-3p	chr1:137966689-137966710_+	21	21	137966689	137966710	+	Yes	Yes	422	38	246	40	68.8209	5.11876	27.1948	4.61906
chr1:137966689-137966711_+	mmu-miR-181b-1-3p	chr1:137966689-137966710_+	21	22	137966689	137966711	+	Yes	No	55	5	77	13	8.96954	0.673521	8.51218	1.50119
chr1:137966690-137966710_+	mmu-miR-181b-1-3p	chr1:137966689-137966710_+	21	20	137966690	137966710	+	No	Yes	5	0	9	0	0.815413	0	0.994931	0
chr2:38853843-38853865_+	mmu-miR-181b-5p	chr2:38853844-38853868_+	24	22	38853843	38853865	+	No	No	7	25	51	20	1.14158	3.3676	5.63794	2.30953
chr2:38853843-38853866_+	mmu-miR-181b-5p	chr2:38853844-38853868_+	24	23	38853843	38853866	+	No	No	10	18	31	24	1.63083	2.42467	3.42698	2.77143
chr2:38853843-38853867_+	mmu-miR-181b-5p	chr2:38853844-38853868_+	24	24	38853843	38853867	+	No	No	24	19	61	38	3.91398	2.55938	6.74342	4.3881
chr2:38853843-38853868_+	mmu-miR-181b-5p	chr2:38853844-38853868_+	24	25	38853843	38853868	+	No	Yes	20	0	13	4	3.26165	0	1.43712	0.461906
chr2:38853843-38853869_+	mmu-miR-181b-5p	chr2:38853844-38853868_+	24	26	38853843	38853869	+	No	No	0	2	11	5	0	0.269408	1.21603	0.577382
chr2:38853844-38853862_+	mmu-miR-181b-5p	chr2:38853844-38853868_+	24	18	38853844	38853862	+	Yes	No	236	248	14	438	38.4875	33.4066	1.54767	50.5787
chr2:38853844-38853863_+	mmu-miR-181b-5p	chr2:38853844-38853868_+	24	19	38853844	38853863	+	Yes	No	110	192	283	265	17.9391	25.8632	31.285	30.6013
chr2:38853844-38853864_+	mmu-miR-181b-5p	chr2:38853844-38853868_+	24	20	38853844	38853864	+	Yes	No	557	915	1127	1316	90.837	123.254	124.587	151.967
chr2:38853844-38853865_+	mmu-miR-181b-5p	chr2:38853844-38853868_+	24	21	38853844	38853865	+	Yes	No	5262	7197	10734	9792	858.141	969.465	1186.62	1130.75
chr2:38853844-38853866_+	mmu-miR-181b-5p	chr2:38853844-38853868_+	24	22	38853844	38853866	+	Yes	No	8196	9130	13250	9913	1336.62	1229.85	1464.76	1144.72
chr2:38853844-38853867_+	mmu-miR-181b-5p	chr2:38853844-38853868_+	24	23	38853844	38853867	+	Yes	No	14923	13651	19954	13752	2433.68	1838.85	2205.87	1588.03
chr2:38853844-38853868_+	mmu-miR-181b-5p	chr2:38853844-38853868_+	24	24	38853844	38853868	+	Yes	Yes	16433	6313	17739	6214	2679.94	850.387	1961.01	717.571
chr2:38853844-38853869_+	mmu-miR-181b-5p	chr2:38853844-38853868_+	24	25	38853844	38853869	+	Yes	No	5376	3751	7661	4683	876.732	505.275	846.907	540.776
chr2:38853844-38853870_+	mmu-miR-181b-5p	chr2:38853844-38853868_+	24	26	38853844	38853870	+	Yes	No	1443	617	1956	759	235.328	83.1124	216.232	87.6466
chr2:38853844-38853871_+	mmu-miR-181b-5p	chr2:38853844-38853868_+	24	27	38853844	38853871	+	Yes	No	213	57	355	92	34.7366	7.67813	39.2445	10.6238
chr2:38853844-38853872_+	mmu-miR-181b-5p	chr2:38853844-38853868_+	24	28	38853844	38853872	+	Yes	No	40	2	59	5	6.5233	0.269408	6.52232	0.577382
chr2:38853845-38853864_+	mmu-miR-181b-5p	chr2:38853844-38853868_+	24	19	38853845	38853864	+	No	No	0	7	5	15	0	0.942929	0.552739	1.73215
chr2:38853845-38853865_+	mmu-miR-181b-5p	chr2:38853844-38853868_+	24	20	38853845	38853865	+	No	No	35	85	120	92	5.70789	11.4498	13.2657	10.6238
chr2:38853845-38853866_+	mmu-miR-181b-5p	chr2:38853844-38853868_+	24	21	38853845	38853866	+	No	No	85	83	97	101	13.862	11.1804	10.7231	11.6631
chr2:38853845-38853867_+	mmu-miR-181b-5p	chr2:38853844-38853868_+	24	22	38853845	38853867	+	No	No	176	178	190	186	28.7025	23.9773	21.0041	21.4786
chr2:38853845-38853868_+	mmu-miR-181b-5p	chr2:38853844-38853868_+	24	23	38853845	38853868	+	No	Yes	275	97	229	125	44.8477	13.0663	25.3155	14.4346
chr2:38853845-38853869_+	mmu-miR-181b-5p	chr2:38853844-38853868_+	24	24	38853845	38853869	+	No	No	114	96	155	99	18.5914	12.9316	17.1349	11.4322
chr2:38853845-38853870_+	mmu-miR-181b-5p	chr2:38853844-38853868_+	24	25	38853845	38853870	+	No	No	33	5	47	17	5.38173	0.673521	5.19575	1.9631
chr2:38853845-38853871_+	mmu-miR-181b-5p	chr2:38853844-38853868_+	24	26	38853845	38853871	+	No	No	0	1	16	1	0	0.134704	1.76877	0.115476
chr2:38853846-38853868_+	mmu-miR-181b-5p	chr2:38853844-38853868_+	24	22	38853846	38853868	+	No	Yes	8	0	5	2	1.30466	0	0.552739	0.230953
chr2:38853847-38853866_+	mmu-miR-181b-5p	chr2:38853844-38853868_+	24	19	38853847	38853866	+	No	No	1	6	18	5	0.163083	0.808225	1.98986	0.577382
chr2:38853847-38853867_+	mmu-miR-181b-5p	chr2:38853844-38853868_+	24	20	38853847	38853867	+	No	No	6	21	10	16	0.978496	2.82879	1.10548	1.84762
chr2:38853847-38853868_+	mmu-miR-181b-5p	chr2:38853844-38853868_+	24	21	38853847	38853868	+	No	Yes	12	8	7	3	1.95699	1.07763	0.773835	0.346429
chr2:38853848-38853866_+	mmu-miR-181b-5p	chr2:38853844-38853868_+	24	18	38853848	38853866	+	No	No	7	11	22	20	1.14158	1.48175	2.43205	2.30953
chr8:84178883-84178906_-	mmu-miR-181c-3p	chr8:84178884-84178906_-	22	23	84178906	84178883	-	Yes	No	0	1	24	17	0	0.134704	2.65315	1.9631
chr8:84178884-84178905_-	mmu-miR-181c-3p	chr8:84178884-84178906_-	22	21	84178905	84178884	-	No	Yes	0	5	11	25	0	0.673521	1.21603	2.88691
chr8:84178884-84178906_-	mmu-miR-181c-3p	chr8:84178884-84178906_-	22	22	84178906	84178884	-	Yes	Yes	295	445	1590	1065	48.1094	59.9433	175.771	122.982
chr8:84178884-84178907_-	mmu-miR-181c-3p	chr8:84178884-84178906_-	22	23	84178907	84178884	-	No	Yes	7	9	86	60	1.14158	1.21234	9.50712	6.92859
chr8:84178885-84178906_-	mmu-miR-181c-3p	chr8:84178884-84178906_-	22	21	84178906	84178885	-	Yes	No	47	176	398	523	7.66488	23.7079	43.998	60.3942
chr8:84178885-84178907_-	mmu-miR-181c-3p	chr8:84178884-84178906_-	22	22	84178907	84178885	-	No	No	49	86	269	245	7.99105	11.5846	29.7374	28.2917
chr8:84178886-84178906_-	mmu-miR-181c-3p	chr8:84178884-84178906_-	22	20	84178906	84178886	-	Yes	No	0	0	0	8	0	0	0	0.923811
chr8:84178919-84178945_-	mmu-miR-181c-5p	chr8:84178923-84178945_-	22	26	84178945	84178919	-	Yes	No	12	5	26	24	1.95699	0.673521	2.87424	2.77143
chr8:84178920-84178945_-	mmu-miR-181c-5p	chr8:84178923-84178945_-	22	25	84178945	84178920	-	Yes	No	21	27	147	130	3.42473	3.63701	16.2505	15.0119
chr8:84178921-84178944_-	mmu-miR-181c-5p	chr8:84178923-84178945_-	22	23	84178944	84178921	-	No	No	10	13	9	21	1.63083	1.75115	0.994931	2.42501
chr8:84178921-84178945_-	mmu-miR-181c-5p	chr8:84178923-84178945_-	22	24	84178945	84178921	-	Yes	No	243	503	1436	1333	39.6291	67.7562	158.747	153.93
chr8:84178922-84178942_-	mmu-miR-181c-5p	chr8:84178923-84178945_-	22	20	84178942	84178922	-	No	No	0	0	0	8	0	0	0	0.923811
chr8:84178922-84178944_-	mmu-miR-181c-5p	chr8:84178923-84178945_-	22	22	84178944	84178922	-	No	No	0	19	36	52	0	2.55938	3.97972	6.00477
chr8:84178922-84178945_-	mmu-miR-181c-5p	chr8:84178923-84178945_-	22	23	84178945	84178922	-	Yes	No	497	1556	2542	3865	81.0521	209.6	281.013	446.316
chr8:84178922-84178946_-	mmu-miR-181c-5p	chr8:84178923-84178945_-	22	24	84178946	84178922	-	No	No	0	0	19	3	0	0	2.10041	0.346429
chr8:84178923-84178944_-	mmu-miR-181c-5p	chr8:84178923-84178945_-	22	21	84178944	84178923	-	No	Yes	4	8	10	33	0.65233	1.07763	1.10548	3.81072
chr8:84178923-84178945_-	mmu-miR-181c-5p	chr8:84178923-84178945_-	22	22	84178945	84178923	-	Yes	Yes	337	881	1036	1686	54.9588	118.674	114.528	194.693
chr8:84178923-84178946_-	mmu-miR-181c-5p	chr8:84178923-84178945_-	22	23	84178946	84178923	-	No	Yes	18	22	35	17	2.93549	2.96349	3.86917	1.9631
chr8:84178924-84178944_-	mmu-miR-181c-5p	chr8:84178923-84178945_-	22	20	84178944	84178924	-	No	No	1	13	10	5	0.163083	1.75115	1.10548	0.577382
chr8:84178924-84178945_-	mmu-miR-181c-5p	chr8:84178923-84178945_-	22	21	84178945	84178924	-	Yes	No	66	201	174	286	10.7635	27.0755	19.2353	33.0263
chr8:84178925-84178945_-	mmu-miR-181c-5p	chr8:84178923-84178945_-	22	20	84178945	84178925	-	Yes	No	17	37	64	64	2.7724	4.98405	7.07506	7.39049
chr8:84178754-84178781_-	mmu-miR-181d-5p	chr8:84178758-84178781_-	23	27	84178781	84178754	-	Yes	No	4	0	10	9	0.65233	0	1.10548	1.03929
chr8:84178755-84178780_-	mmu-miR-181d-5p	chr8:84178758-84178781_-	23	25	84178780	84178755	-	No	No	16	2	9	6	2.60932	0.269408	0.994931	0.692859
chr8:84178755-84178781_-	mmu-miR-181d-5p	chr8:84178758-84178781_-	23	26	84178781	84178755	-	Yes	No	537	134	855	358	87.5754	18.0503	94.5184	41.3406
chr8:84178756-84178781_-	mmu-miR-181d-5p	chr8:84178758-84178781_-	23	25	84178781	84178756	-	Yes	No	41	75	299	331	6.68639	10.1028	33.0538	38.2227
chr8:84178757-84178780_-	mmu-miR-181d-5p	chr8:84178758-84178781_-	23	23	84178780	84178757	-	No	No	3	2	32	23	0.489248	0.269408	3.53753	2.65596
chr8:84178757-84178781_-	mmu-miR-181d-5p	chr8:84178758-84178781_-	23	24	84178781	84178757	-	Yes	No	660	748	4222	2289	107.635	100.759	466.733	264.326
chr8:84178758-84178780_-	mmu-miR-181d-5p	chr8:84178758-84178781_-	23	22	84178780	84178758	-	No	Yes	5	3	11	21	0.815413	0.404112	1.21603	2.42501
chr8:84178758-84178781_-	mmu-miR-181d-5p	chr8:84178758-84178781_-	23	23	84178781	84178758	-	Yes	Yes	383	896	2896	2563	62.4606	120.695	320.147	295.966
chr8:84178758-84178782_-	mmu-miR-181d-5p	chr8:84178758-84178781_-	23	24	84178782	84178758	-	No	Yes	4	11	10	4	0.65233	1.48175	1.10548	0.461906
chr8:84178759-84178781_-	mmu-miR-181d-5p	chr8:84178758-84178781_-	23	22	84178781	84178759	-	Yes	No	153	401	638	1029	24.9516	54.0163	70.5295	118.825
chr8:84178760-84178781_-	mmu-miR-181d-5p	chr8:84178758-84178781_-	23	21	84178781	84178760	-	Yes	No	89	144	169	268	14.5144	19.3974	18.6826	30.9477
chr8:84178761-84178781_-	mmu-miR-181d-5p	chr8:84178758-84178781_-	23	20	84178781	84178761	-	Yes	No	1	14	2	29	0.163083	1.88586	0.221096	3.34882
chr8:84178763-84178781_-	mmu-miR-181d-5p	chr8:84178758-84178781_-	23	18	84178781	84178763	-	Yes	No	10	10	0	45	1.63083	1.34704	0	5.19644
chr6:30165958-30165986_-	mmu-miR-182-5p	chr6:30165961-30165986_-	25	28	30165986	30165958	-	Yes	No	10	14	14	45	1.63083	1.88586	1.54767	5.19644
chr6:30165959-30165986_-	mmu-miR-182-5p	chr6:30165961-30165986_-	25	27	30165986	30165959	-	Yes	No	72	167	74	228	11.7419	22.4956	8.18054	26.3286
chr6:30165960-30165979_-	mmu-miR-182-5p	chr6:30165961-30165986_-	25	19	30165979	30165960	-	No	No	3	8	19	20	0.489248	1.07763	2.10041	2.30953
chr6:30165960-30165980_-	mmu-miR-182-5p	chr6:30165961-30165986_-	25	20	30165980	30165960	-	No	No	0	13	0	14	0	1.75115	0	1.61667
chr6:30165960-30165981_-	mmu-miR-182-5p	chr6:30165961-30165986_-	25	21	30165981	30165960	-	No	No	11	40	23	38	1.79391	5.38816	2.5426	4.3881
chr6:30165960-30165985_-	mmu-miR-182-5p	chr6:30165961-30165986_-	25	25	30165985	30165960	-	No	No	15	36	23	29	2.44624	4.84935	2.5426	3.34882
chr6:30165960-30165986_-	mmu-miR-182-5p	chr6:30165961-30165986_-	25	26	30165986	30165960	-	Yes	No	1148	3369	2486	5220	187.219	453.818	274.822	602.787
chr6:30165961-30165979_-	mmu-miR-182-5p	chr6:30165961-30165986_-	25	18	30165979	30165961	-	No	Yes	18	50	41	160	2.93549	6.73521	4.53246	18.4762
chr6:30165961-30165980_-	mmu-miR-182-5p	chr6:30165961-30165986_-	25	19	30165980	30165961	-	No	Yes	4	48	11	60	0.65233	6.4658	1.21603	6.92859
chr6:30165961-30165981_-	mmu-miR-182-5p	chr6:30165961-30165986_-	25	20	30165981	30165961	-	No	Yes	27	212	35	235	4.40323	28.5573	3.86917	27.137
chr6:30165961-30165982_-	mmu-miR-182-5p	chr6:30165961-30165986_-	25	21	30165982	30165961	-	No	Yes	15	7	0	12	2.44624	0.942929	0	1.38572
chr6:30165961-30165985_-	mmu-miR-182-5p	chr6:30165961-30165986_-	25	24	30165985	30165961	-	No	Yes	29	123	55	124	4.7294	16.5686	6.08013	14.3191
chr6:30165961-30165986_-	mmu-miR-182-5p	chr6:30165961-30165986_-	25	25	30165986	30165961	-	Yes	Yes	3323	17044	6577	18569	541.923	2295.9	727.073	2144.28
chr6:30165962-30165980_-	mmu-miR-182-5p	chr6:30165961-30165986_-	25	18	30165980	30165962	-	No	No	2	6	15	16	0.326165	0.808225	1.65822	1.84762
chr6:30165962-30165981_-	mmu-miR-182-5p	chr6:30165961-30165986_-	25	19	30165981	30165962	-	No	No	73	93	100	128	11.905	12.5275	11.0548	14.781
chr6:30165962-30165982_-	mmu-miR-182-5p	chr6:30165961-30165986_-	25	20	30165982	30165962	-	No	No	6	5	8	19	0.978496	0.673521	0.884383	2.19405
chr6:30165962-30165985_-	mmu-miR-182-5p	chr6:30165961-30165986_-	25	23	30165985	30165962	-	No	No	53	65	107	116	8.64338	8.75577	11.8286	13.3953
chr6:30165962-30165986_-	mmu-miR-182-5p	chr6:30165961-30165986_-	25	24	30165986	30165962	-	Yes	No	6377	11560	14951	15028	1039.98	1557.18	1652.8	1735.38
chr6:30165963-30165981_-	mmu-miR-182-5p	chr6:30165961-30165986_-	25	18	30165981	30165963	-	No	No	28	43	34	88	4.56631	5.79228	3.75863	10.1619
chr6:30165963-30165982_-	mmu-miR-182-5p	chr6:30165961-30165986_-	25	19	30165982	30165963	-	No	No	7	0	5	18	1.14158	0	0.552739	2.07858
chr6:30165963-30165985_-	mmu-miR-182-5p	chr6:30165961-30165986_-	25	22	30165985	30165963	-	No	No	37	62	31	61	6.03406	8.35165	3.42698	7.04406
chr6:30165963-30165986_-	mmu-miR-182-5p	chr6:30165961-30165986_-	25	23	30165986	30165963	-	Yes	No	3674	9026	6277	12607	599.165	1215.84	693.909	1455.81
chr6:30165964-30165982_-	mmu-miR-182-5p	chr6:30165961-30165986_-	25	18	30165982	30165964	-	No	No	0	2	4	15	0	0.269408	0.442191	1.73215
chr6:30165964-30165985_-	mmu-miR-182-5p	chr6:30165961-30165986_-	25	21	30165985	30165964	-	No	No	1	43	15	67	0.163083	5.79228	1.65822	7.73692
chr6:30165964-30165986_-	mmu-miR-182-5p	chr6:30165961-30165986_-	25	22	30165986	30165964	-	Yes	No	1577	8105	2700	9552	257.181	1091.78	298.479	1103.03
chr6:30165965-30165985_-	mmu-miR-182-5p	chr6:30165961-30165986_-	25	20	30165985	30165965	-	No	No	3	18	5	16	0.489248	2.42467	0.552739	1.84762
chr6:30165965-30165986_-	mmu-miR-182-5p	chr6:30165961-30165986_-	25	21	30165986	30165965	-	Yes	No	672	1772	1351	2206	109.592	238.696	149.35	254.741
chr6:30165966-30165986_-	mmu-miR-182-5p	chr6:30165961-30165986_-	25	20	30165986	30165966	-	Yes	No	92	471	83	535	15.0036	63.4456	9.17547	61.7799
chr6:30165967-30165986_-	mmu-miR-182-5p	chr6:30165961-30165986_-	25	19	30165986	30165967	-	Yes	No	9	65	34	63	1.46774	8.75577	3.75863	7.27502
chr6:30165968-30165986_-	mmu-miR-182-5p	chr6:30165961-30165986_-	25	18	30165986	30165968	-	Yes	No	5	169	13	131	0.815413	22.765	1.43712	15.1274
chr6:30169670-30169692_-	mmu-miR-183-3p	chr6:30169671-30169693_-	22	22	30169692	30169670	-	No	No	0	18	6	32	0	2.42467	0.663287	3.69525
chr6:30169671-30169692_-	mmu-miR-183-3p	chr6:30169671-30169693_-	22	21	30169692	30169671	-	No	Yes	0	1	0	14	0	0.134704	0	1.61667
chr6:30169673-30169692_-	mmu-miR-183-3p	chr6:30169671-30169693_-	22	19	30169692	30169673	-	No	No	0	8	0	0	0	1.07763	0	0
chr6:30169705-30169732_-	mmu-miR-183-5p	chr6:30169710-30169732_-	22	27	30169732	30169705	-	Yes	No	0	5	3	11	0	0.673521	0.331644	1.27024
chr6:30169706-30169731_-	mmu-miR-183-5p	chr6:30169710-30169732_-	22	25	30169731	30169706	-	No	No	6	26	23	20	0.978496	3.50231	2.5426	2.30953
chr6:30169706-30169732_-	mmu-miR-183-5p	chr6:30169710-30169732_-	22	26	30169732	30169706	-	Yes	No	4	24	21	27	0.65233	3.2329	2.3215	3.11786
chr6:30169707-30169731_-	mmu-miR-183-5p	chr6:30169710-30169732_-	22	24	30169731	30169707	-	No	No	30	67	57	128	4.89248	9.02517	6.30123	14.781
chr6:30169707-30169732_-	mmu-miR-183-5p	chr6:30169710-30169732_-	22	25	30169732	30169707	-	Yes	No	51	58	101	57	8.31721	7.81284	11.1653	6.58216
chr6:30169708-30169726_-	mmu-miR-183-5p	chr6:30169710-30169732_-	22	18	30169726	30169708	-	No	No	5	19	8	30	0.815413	2.55938	0.884383	3.46429
chr6:30169708-30169727_-	mmu-miR-183-5p	chr6:30169710-30169732_-	22	19	30169727	30169708	-	No	No	5	9	15	41	0.815413	1.21234	1.65822	4.73453
chr6:30169708-30169731_-	mmu-miR-183-5p	chr6:30169710-30169732_-	22	23	30169731	30169708	-	No	No	761	1532	1456	2393	124.106	206.367	160.958	276.335
chr6:30169708-30169732_-	mmu-miR-183-5p	chr6:30169710-30169732_-	22	24	30169732	30169708	-	Yes	No	849	1426	1614	2311	138.457	192.088	178.424	266.866
chr6:30169709-30169727_-	mmu-miR-183-5p	chr6:30169710-30169732_-	22	18	30169727	30169709	-	No	No	10	51	34	89	1.63083	6.86991	3.75863	10.2774
chr6:30169709-30169731_-	mmu-miR-183-5p	chr6:30169710-30169732_-	22	22	30169731	30169709	-	No	No	824	3309	1561	4606	134.38	445.736	172.565	531.884
chr6:30169709-30169732_-	mmu-miR-183-5p	chr6:30169710-30169732_-	22	23	30169732	30169709	-	Yes	No	1513	6525	2941	8780	246.744	878.944	325.121	1013.88
chr6:30169709-30169733_-	mmu-miR-183-5p	chr6:30169710-30169732_-	22	24	30169733	30169709	-	No	No	0	7	1	10	0	0.942929	0.110548	1.15476
chr6:30169710-30169731_-	mmu-miR-183-5p	chr6:30169710-30169732_-	22	21	30169731	30169710	-	No	Yes	962	2033	1962	2927	156.885	273.853	216.895	338
chr6:30169710-30169732_-	mmu-miR-183-5p	chr6:30169710-30169732_-	22	22	30169732	30169710	-	Yes	Yes	5073	14153	10591	18787	827.318	1906.47	1170.81	2169.46
chr6:30169710-30169733_-	mmu-miR-183-5p	chr6:30169710-30169732_-	22	23	30169733	30169710	-	No	Yes	8	22	22	52	1.30466	2.96349	2.43205	6.00477
chr6:30169711-30169731_-	mmu-miR-183-5p	chr6:30169710-30169732_-	22	20	30169731	30169711	-	No	No	44	195	47	296	7.17563	26.2673	5.19575	34.181
chr6:30169711-30169732_-	mmu-miR-183-5p	chr6:30169710-30169732_-	22	21	30169732	30169711	-	Yes	No	209	756	245	1297	34.0843	101.836	27.0842	149.773
chr6:30169712-30169732_-	mmu-miR-183-5p	chr6:30169710-30169732_-	22	20	30169732	30169712	-	Yes	No	1	59	4	56	0.163083	7.94754	0.442191	6.46668
chr6:30169713-30169732_-	mmu-miR-183-5p	chr6:30169710-30169732_-	22	19	30169732	30169713	-	Yes	No	0	35	12	21	0	4.71464	1.32657	2.42501
chr6:30169714-30169732_-	mmu-miR-183-5p	chr6:30169710-30169732_-	22	18	30169732	30169714	-	Yes	No	4	43	3	45	0.65233	5.79228	0.331644	5.19644
chr7:81529955-81529978_+	mmu-miR-1839-3p	chr7:81529957-81529980_+	23	23	81529955	81529978	+	No	No	0	0	4	10	0	0	0.442191	1.15476
chr7:81529956-81529978_+	mmu-miR-1839-3p	chr7:81529957-81529980_+	23	22	81529956	81529978	+	No	No	0	0	15	8	0	0	1.65822	0.923811
chr7:81529957-81529978_+	mmu-miR-1839-3p	chr7:81529957-81529980_+	23	21	81529957	81529978	+	Yes	No	17	73	56	77	2.7724	9.8334	6.19068	8.89169
chr7:81529957-81529979_+	mmu-miR-1839-3p	chr7:81529957-81529980_+	23	22	81529957	81529979	+	Yes	No	22	40	32	22	3.58782	5.38816	3.53753	2.54048
chr7:81529917-81529938_+	mmu-miR-1839-5p	chr7:81529918-81529940_+	22	21	81529917	81529938	+	No	No	7	12	5	10	1.14158	1.61645	0.552739	1.15476
chr7:81529917-81529939_+	mmu-miR-1839-5p	chr7:81529918-81529940_+	22	22	81529917	81529939	+	No	No	6	0	2	23	0.978496	0	0.221096	2.65596
chr7:81529917-81529940_+	mmu-miR-1839-5p	chr7:81529918-81529940_+	22	23	81529917	81529940	+	No	Yes	11	37	62	47	1.79391	4.98405	6.85397	5.42739
chr7:81529917-81529941_+	mmu-miR-1839-5p	chr7:81529918-81529940_+	22	24	81529917	81529941	+	No	No	17	3	16	20	2.7724	0.404112	1.76877	2.30953
chr7:81529918-81529936_+	mmu-miR-1839-5p	chr7:81529918-81529940_+	22	18	81529918	81529936	+	Yes	No	0	2	2	9	0	0.269408	0.221096	1.03929
chr7:81529918-81529937_+	mmu-miR-1839-5p	chr7:81529918-81529940_+	22	19	81529918	81529937	+	Yes	No	56	102	10	89	9.13263	13.7398	1.10548	10.2774
chr7:81529918-81529938_+	mmu-miR-1839-5p	chr7:81529918-81529940_+	22	20	81529918	81529938	+	Yes	No	203	343	126	306	33.1058	46.2035	13.929	35.3358
chr7:81529918-81529939_+	mmu-miR-1839-5p	chr7:81529918-81529940_+	22	21	81529918	81529939	+	Yes	No	179	372	343	378	29.1918	50.1099	37.9179	43.6501
chr7:81529918-81529940_+	mmu-miR-1839-5p	chr7:81529918-81529940_+	22	22	81529918	81529940	+	Yes	Yes	2596	2948	4399	3886	423.362	397.108	486.3	448.741
chr7:81529918-81529941_+	mmu-miR-1839-5p	chr7:81529918-81529940_+	22	23	81529918	81529941	+	Yes	No	1888	2354	2969	3357	307.9	317.093	328.217	387.654
chr7:81529918-81529942_+	mmu-miR-1839-5p	chr7:81529918-81529940_+	22	24	81529918	81529942	+	Yes	No	142	207	266	305	23.1577	27.8837	29.4057	35.2203
chr7:81529918-81529943_+	mmu-miR-1839-5p	chr7:81529918-81529940_+	22	25	81529918	81529943	+	Yes	No	35	15	56	37	5.70789	2.02056	6.19068	4.27263
chr7:81529918-81529944_+	mmu-miR-1839-5p	chr7:81529918-81529940_+	22	26	81529918	81529944	+	Yes	No	0	1	0	9	0	0.134704	0	1.03929
chr7:81529919-81529937_+	mmu-miR-1839-5p	chr7:81529918-81529940_+	22	18	81529919	81529937	+	No	No	6	12	0	25	0.978496	1.61645	0	2.88691
chr7:81529919-81529938_+	mmu-miR-1839-5p	chr7:81529918-81529940_+	22	19	81529919	81529938	+	No	No	36	64	20	77	5.87097	8.62106	2.21096	8.89169
chr7:81529919-81529939_+	mmu-miR-1839-5p	chr7:81529918-81529940_+	22	20	81529919	81529939	+	No	No	21	32	52	61	3.42473	4.31053	5.74849	7.04406
chr7:81529919-81529940_+	mmu-miR-1839-5p	chr7:81529918-81529940_+	22	21	81529919	81529940	+	No	Yes	784	880	1156	1230	127.857	118.54	127.793	142.036
chr7:81529919-81529941_+	mmu-miR-1839-5p	chr7:81529918-81529940_+	22	22	81529919	81529941	+	No	No	507	654	698	829	82.6829	88.0965	77.1624	95.73
chr7:81529919-81529942_+	mmu-miR-1839-5p	chr7:81529918-81529940_+	22	23	81529919	81529942	+	No	No	159	315	248	436	25.9301	42.4318	27.4159	50.3477
chr7:81529919-81529943_+	mmu-miR-1839-5p	chr7:81529918-81529940_+	22	24	81529919	81529943	+	No	No	15	56	36	32	2.44624	7.54343	3.97972	3.69525
chr7:81529919-81529944_+	mmu-miR-1839-5p	chr7:81529918-81529940_+	22	25	81529919	81529944	+	No	No	5	2	5	15	0.815413	0.269408	0.552739	1.73215
chr7:81529920-81529941_+	mmu-miR-1839-5p	chr7:81529918-81529940_+	22	21	81529920	81529941	+	No	No	6	2	3	10	0.978496	0.269408	0.331644	1.15476
chr9:89802259-89802284_-	mmu-miR-184-3p	chr9:89802262-89802284_-	22	25	89802284	89802259	-	Yes	No	3	5	12	4	0.489248	0.673521	1.32657	0.461906
chr9:89802260-89802284_-	mmu-miR-184-3p	chr9:89802262-89802284_-	22	24	89802284	89802260	-	Yes	No	24	40	23	66	3.91398	5.38816	2.5426	7.62144
chr9:89802261-89802284_-	mmu-miR-184-3p	chr9:89802262-89802284_-	22	23	89802284	89802261	-	Yes	No	77	92	143	153	12.5574	12.3928	15.8083	17.6679
chr9:89802262-89802283_-	mmu-miR-184-3p	chr9:89802262-89802284_-	22	21	89802283	89802262	-	No	Yes	22	25	36	35	3.58782	3.3676	3.97972	4.04168
chr9:89802262-89802284_-	mmu-miR-184-3p	chr9:89802262-89802284_-	22	22	89802284	89802262	-	Yes	Yes	1417	796	1758	1395	231.088	107.224	194.343	161.09
chr9:89802263-89802284_-	mmu-miR-184-3p	chr9:89802262-89802284_-	22	21	89802284	89802263	-	Yes	No	155	171	219	202	25.2778	23.0344	24.21	23.3262
chr9:89802264-89802283_-	mmu-miR-184-3p	chr9:89802262-89802284_-	22	19	89802283	89802264	-	No	No	3	8	9	1	0.489248	1.07763	0.994931	0.115476
chr9:89802264-89802284_-	mmu-miR-184-3p	chr9:89802262-89802284_-	22	20	89802284	89802264	-	Yes	No	162	134	254	362	26.4194	18.0503	28.0792	41.8025
chr9:89802265-89802284_-	mmu-miR-184-3p	chr9:89802262-89802284_-	22	19	89802284	89802265	-	Yes	No	20	23	35	26	3.26165	3.09819	3.86917	3.00239
chr9:89802266-89802284_-	mmu-miR-184-3p	chr9:89802262-89802284_-	22	18	89802284	89802266	-	Yes	No	2	1	0	12	0.326165	0.134704	0	1.38572
chr12:80391612-80391636_-	mmu-miR-1843a-3p	chr12:80391614-80391636_-	22	24	80391636	80391612	-	Yes	No	8	4	11	0	1.30466	0.538816	1.21603	0
chr12:80391613-80391636_-	mmu-miR-1843a-3p	chr12:80391614-80391636_-	22	23	80391636	80391613	-	Yes	No	13	26	7	25	2.12007	3.50231	0.773835	2.88691
chr12:80391614-80391636_-	mmu-miR-1843a-3p	chr12:80391614-80391636_-	22	22	80391636	80391614	-	Yes	Yes	85	107	80	93	13.862	14.4133	8.84383	10.7393
chr12:80391614-80391638_-	mmu-miR-1843a-3p	chr12:80391614-80391636_-	22	24	80391638	80391614	-	No	Yes	0	11	0	3	0	1.48175	0	0.346429
chr12:80391615-80391636_-	mmu-miR-1843a-3p	chr12:80391614-80391636_-	22	21	80391636	80391615	-	Yes	No	33	5	22	14	5.38173	0.673521	2.43205	1.61667
chr12:80391616-80391636_-	mmu-miR-1843a-3p	chr12:80391614-80391636_-	22	20	80391636	80391616	-	Yes	No	4	14	14	5	0.65233	1.88586	1.54767	0.577382
chr12:80391617-80391638_-	mmu-miR-1843a-3p	chr12:80391614-80391636_-	22	21	80391638	80391617	-	No	No	0	14	0	6	0	1.88586	0	0.692859
chr12:80391650-80391674_-	mmu-miR-1843a-5p	chr12:80391653-80391674_-	21	24	80391674	80391650	-	Yes	No	11	13	4	7	1.79391	1.75115	0.442191	0.808335
chr12:80391651-80391673_-	mmu-miR-1843a-5p	chr12:80391653-80391674_-	21	22	80391673	80391651	-	No	No	9	19	33	44	1.46774	2.55938	3.64808	5.08096
chr12:80391651-80391674_-	mmu-miR-1843a-5p	chr12:80391653-80391674_-	21	23	80391674	80391651	-	Yes	No	16	21	75	27	2.60932	2.82879	8.29109	3.11786
chr12:80391652-80391673_-	mmu-miR-1843a-5p	chr12:80391653-80391674_-	21	21	80391673	80391652	-	No	No	225	269	549	606	36.6936	36.2354	60.6908	69.9787
chr12:80391652-80391674_-	mmu-miR-1843a-5p	chr12:80391653-80391674_-	21	22	80391674	80391652	-	Yes	No	401	341	647	476	65.3961	45.9341	71.5245	54.9668
chr12:80391652-80391675_-	mmu-miR-1843a-5p	chr12:80391653-80391674_-	21	23	80391675	80391652	-	No	No	6	4	13	21	0.978496	0.538816	1.43712	2.42501
chr12:80391652-80391676_-	mmu-miR-1843a-5p	chr12:80391653-80391674_-	21	24	80391676	80391652	-	No	No	0	0	10	0	0	0	1.10548	0
chr12:80391653-80391673_-	mmu-miR-1843a-5p	chr12:80391653-80391674_-	21	20	80391673	80391653	-	No	Yes	112	288	267	499	18.2653	38.7948	29.5163	57.6227
chr12:80391653-80391674_-	mmu-miR-1843a-5p	chr12:80391653-80391674_-	21	21	80391674	80391653	-	Yes	Yes	378	696	610	785	61.6452	93.7541	67.4342	90.649
chr12:80391653-80391675_-	mmu-miR-1843a-5p	chr12:80391653-80391674_-	21	22	80391675	80391653	-	No	Yes	40	59	87	48	6.5233	7.94754	9.61766	5.54287
chr12:80391654-80391673_-	mmu-miR-1843a-5p	chr12:80391653-80391674_-	21	19	80391673	80391654	-	No	No	7	5	9	19	1.14158	0.673521	0.994931	2.19405
chr12:80391654-80391674_-	mmu-miR-1843a-5p	chr12:80391653-80391674_-	21	20	80391674	80391654	-	Yes	No	31	75	33	61	5.05556	10.1028	3.64808	7.04406
chr12:80391654-80391675_-	mmu-miR-1843a-5p	chr12:80391653-80391674_-	21	21	80391675	80391654	-	No	No	58	38	111	39	9.45879	5.11876	12.2708	4.50358
chr12:80391654-80391676_-	mmu-miR-1843a-5p	chr12:80391653-80391674_-	21	22	80391676	80391654	-	No	No	14	4	18	10	2.28316	0.538816	1.98986	1.15476
chr12:80391655-80391673_-	mmu-miR-1843a-5p	chr12:80391653-80391674_-	21	18	80391673	80391655	-	No	No	0	7	3	23	0	0.942929	0.331644	2.65596
chr12:80391655-80391674_-	mmu-miR-1843a-5p	chr12:80391653-80391674_-	21	19	80391674	80391655	-	Yes	No	3	7	7	26	0.489248	0.942929	0.773835	3.00239
chr12:80391655-80391675_-	mmu-miR-1843a-5p	chr12:80391653-80391674_-	21	20	80391675	80391655	-	No	No	10	13	11	6	1.63083	1.75115	1.21603	0.692859
chr1:159340396-159340418_+	mmu-miR-1843b-3p	chr1:159340399-159340419_+	20	22	159340396	159340418	+	No	No	0	1	0	11	0	0.134704	0	1.27024
chr1:159340396-159340419_+	mmu-miR-1843b-3p	chr1:159340399-159340419_+	20	23	159340396	159340419	+	No	Yes	15	15	9	23	2.44624	2.02056	0.994931	2.65596
chr1:159340396-159340420_+	mmu-miR-1843b-3p	chr1:159340399-159340419_+	20	24	159340396	159340420	+	No	No	4	18	0	17	0.65233	2.42467	0	1.9631
chr1:159340397-159340416_+	mmu-miR-1843b-3p	chr1:159340399-159340419_+	20	19	159340397	159340416	+	No	No	2	0	0	9	0.326165	0	0	1.03929
chr1:159340397-159340417_+	mmu-miR-1843b-3p	chr1:159340399-159340419_+	20	20	159340397	159340417	+	No	No	0	8	0	4	0	1.07763	0	0.461906
chr1:159340397-159340418_+	mmu-miR-1843b-3p	chr1:159340399-159340419_+	20	21	159340397	159340418	+	No	No	3	1	0	20	0.489248	0.134704	0	2.30953
chr1:159340397-159340419_+	mmu-miR-1843b-3p	chr1:159340399-159340419_+	20	22	159340397	159340419	+	No	Yes	0	3	2	29	0	0.404112	0.221096	3.34882
chr1:159340397-159340420_+	mmu-miR-1843b-3p	chr1:159340399-159340419_+	20	23	159340397	159340420	+	No	No	12	4	23	46	1.95699	0.538816	2.5426	5.31192
chr1:159340398-159340417_+	mmu-miR-1843b-3p	chr1:159340399-159340419_+	20	19	159340398	159340417	+	No	No	0	4	0	9	0	0.538816	0	1.03929
chr1:159340398-159340418_+	mmu-miR-1843b-3p	chr1:159340399-159340419_+	20	20	159340398	159340418	+	No	No	5	15	4	40	0.815413	2.02056	0.442191	4.61906
chr1:159340398-159340419_+	mmu-miR-1843b-3p	chr1:159340399-159340419_+	20	21	159340398	159340419	+	No	Yes	40	24	33	56	6.5233	3.2329	3.64808	6.46668
chr1:159340398-159340420_+	mmu-miR-1843b-3p	chr1:159340399-159340419_+	20	22	159340398	159340420	+	No	No	63	72	83	127	10.2742	9.6987	9.17547	14.6655
chr1:159340398-159340421_+	mmu-miR-1843b-3p	chr1:159340399-159340419_+	20	23	159340398	159340421	+	No	No	19	17	13	42	3.09857	2.28997	1.43712	4.85001
chr1:159340398-159340423_+	mmu-miR-1843b-3p	chr1:159340399-159340419_+	20	25	159340398	159340423	+	No	No	0	0	16	7	0	0	1.76877	0.808335
chr1:159340359-159340379_+	mmu-miR-1843b-5p	chr1:159340361-159340382_+	21	20	159340359	159340379	+	No	No	0	0	12	15	0	0	1.32657	1.73215
chr1:159340359-159340380_+	mmu-miR-1843b-5p	chr1:159340361-159340382_+	21	21	159340359	159340380	+	No	No	27	46	24	43	4.40323	6.19639	2.65315	4.96549
chr1:159340359-159340381_+	mmu-miR-1843b-5p	chr1:159340361-159340382_+	21	22	159340359	159340381	+	No	No	124	151	135	244	20.2222	20.3403	14.924	28.1762
chr1:159340359-159340382_+	mmu-miR-1843b-5p	chr1:159340361-159340382_+	21	23	159340359	159340382	+	No	Yes	23	22	45	39	3.7509	2.96349	4.97465	4.50358
chr1:159340359-159340383_+	mmu-miR-1843b-5p	chr1:159340361-159340382_+	21	24	159340359	159340383	+	No	No	20	4	7	12	3.26165	0.538816	0.773835	1.38572
chr1:159340359-159340384_+	mmu-miR-1843b-5p	chr1:159340361-159340382_+	21	25	159340359	159340384	+	No	No	0	0	19	8	0	0	2.10041	0.923811
chr1:159340360-159340379_+	mmu-miR-1843b-5p	chr1:159340361-159340382_+	21	19	159340360	159340379	+	No	No	0	21	15	20	0	2.82879	1.65822	2.30953
chr1:159340360-159340380_+	mmu-miR-1843b-5p	chr1:159340361-159340382_+	21	20	159340360	159340380	+	No	No	28	35	20	78	4.56631	4.71464	2.21096	9.00716
chr1:159340360-159340381_+	mmu-miR-1843b-5p	chr1:159340361-159340382_+	21	21	159340360	159340381	+	No	No	426	690	707	933	69.4732	92.9458	78.1573	107.74
chr1:159340360-159340382_+	mmu-miR-1843b-5p	chr1:159340361-159340382_+	21	22	159340360	159340382	+	No	Yes	243	235	389	358	39.6291	31.6555	43.0031	41.3406
chr1:159340360-159340383_+	mmu-miR-1843b-5p	chr1:159340361-159340382_+	21	23	159340360	159340383	+	No	No	62	48	125	105	10.1111	6.4658	13.8185	12.125
chr1:159340360-159340384_+	mmu-miR-1843b-5p	chr1:159340361-159340382_+	21	24	159340360	159340384	+	No	No	13	31	22	20	2.12007	4.17583	2.43205	2.30953
chr1:159340361-159340379_+	mmu-miR-1843b-5p	chr1:159340361-159340382_+	21	18	159340361	159340379	+	Yes	No	0	7	5	14	0	0.942929	0.552739	1.61667
chr1:159340361-159340380_+	mmu-miR-1843b-5p	chr1:159340361-159340382_+	21	19	159340361	159340380	+	Yes	No	1	7	8	19	0.163083	0.942929	0.884383	2.19405
chr1:159340361-159340381_+	mmu-miR-1843b-5p	chr1:159340361-159340382_+	21	20	159340361	159340381	+	Yes	No	137	275	252	507	22.3423	37.0436	27.8581	58.5466
chr1:159340361-159340382_+	mmu-miR-1843b-5p	chr1:159340361-159340382_+	21	21	159340361	159340382	+	Yes	Yes	239	291	504	574	38.9767	39.1989	55.7161	66.2835
chr1:159340361-159340383_+	mmu-miR-1843b-5p	chr1:159340361-159340382_+	21	22	159340361	159340383	+	Yes	No	10	10	37	36	1.63083	1.34704	4.09027	4.15715
chr16:18327401-18327425_-	mmu-miR-185-3p	chr16:18327404-18327425_-	21	24	18327425	18327401	-	Yes	No	1	6	16	0	0.163083	0.808225	1.76877	0
chr16:18327402-18327425_-	mmu-miR-185-3p	chr16:18327404-18327425_-	21	23	18327425	18327402	-	Yes	No	9	27	8	9	1.46774	3.63701	0.884383	1.03929
chr16:18327403-18327425_-	mmu-miR-185-3p	chr16:18327404-18327425_-	21	22	18327425	18327403	-	Yes	No	37	37	63	46	6.03406	4.98405	6.96451	5.31192
chr16:18327404-18327425_-	mmu-miR-185-3p	chr16:18327404-18327425_-	21	21	18327425	18327404	-	Yes	Yes	202	248	290	217	32.9427	33.4066	32.0589	25.0584
chr16:18327404-18327426_-	mmu-miR-185-3p	chr16:18327404-18327425_-	21	22	18327426	18327404	-	No	Yes	46	57	38	54	7.5018	7.67813	4.20082	6.23573
chr16:18327405-18327425_-	mmu-miR-185-3p	chr16:18327404-18327425_-	21	20	18327425	18327405	-	Yes	No	55	54	34	58	8.96954	7.27402	3.75863	6.69763
chr16:18327433-18327459_-	mmu-miR-185-5p	chr16:18327437-18327459_-	22	26	18327459	18327433	-	Yes	No	11	0	3	0	1.79391	0	0.331644	0
chr16:18327434-18327459_-	mmu-miR-185-5p	chr16:18327437-18327459_-	22	25	18327459	18327434	-	Yes	No	14	9	20	7	2.28316	1.21234	2.21096	0.808335
chr16:18327435-18327459_-	mmu-miR-185-5p	chr16:18327437-18327459_-	22	24	18327459	18327435	-	Yes	No	191	171	398	201	31.1488	23.0344	43.998	23.2108
chr16:18327436-18327459_-	mmu-miR-185-5p	chr16:18327437-18327459_-	22	23	18327459	18327436	-	Yes	No	266	353	503	329	43.38	47.5505	55.6056	37.9917
chr16:18327437-18327458_-	mmu-miR-185-5p	chr16:18327437-18327459_-	22	21	18327458	18327437	-	No	Yes	13	15	50	45	2.12007	2.02056	5.52739	5.19644
chr16:18327437-18327459_-	mmu-miR-185-5p	chr16:18327437-18327459_-	22	22	18327459	18327437	-	Yes	Yes	878	1202	1478	1111	143.187	161.914	163.39	128.294
chr16:18327438-18327458_-	mmu-miR-185-5p	chr16:18327437-18327459_-	22	20	18327458	18327438	-	No	No	11	8	6	6	1.79391	1.07763	0.663287	0.692859
chr16:18327438-18327459_-	mmu-miR-185-5p	chr16:18327437-18327459_-	22	21	18327459	18327438	-	Yes	No	270	528	372	511	44.0323	71.1238	41.1238	59.0085
chr16:18327439-18327458_-	mmu-miR-185-5p	chr16:18327437-18327459_-	22	19	18327458	18327439	-	No	No	0	11	0	2	0	1.48175	0	0.230953
chr16:18327439-18327459_-	mmu-miR-185-5p	chr16:18327437-18327459_-	22	20	18327459	18327439	-	Yes	No	132	234	240	255	21.5269	31.5208	26.5315	29.4465
chr16:18327440-18327459_-	mmu-miR-185-5p	chr16:18327437-18327459_-	22	19	18327459	18327440	-	Yes	No	40	65	11	60	6.5233	8.75577	1.21603	6.92859
chr3:157544283-157544305_+	mmu-miR-186-5p	chr3:157544284-157544306_+	22	22	157544283	157544305	+	No	No	17	28	66	41	2.7724	3.77171	7.29616	4.73453
chr3:157544283-157544306_+	mmu-miR-186-5p	chr3:157544284-157544306_+	22	23	157544283	157544306	+	No	Yes	0	5	6	12	0	0.673521	0.663287	1.38572
chr3:157544284-157544303_+	mmu-miR-186-5p	chr3:157544284-157544306_+	22	19	157544284	157544303	+	Yes	No	9	8	23	11	1.46774	1.07763	2.5426	1.27024
chr3:157544284-157544304_+	mmu-miR-186-5p	chr3:157544284-157544306_+	22	20	157544284	157544304	+	Yes	No	34	67	76	73	5.54481	9.02517	8.40164	8.42978
chr3:157544284-157544305_+	mmu-miR-186-5p	chr3:157544284-157544306_+	22	21	157544284	157544305	+	Yes	No	1807	2305	3240	2962	294.69	310.493	358.175	342.041
chr3:157544284-157544306_+	mmu-miR-186-5p	chr3:157544284-157544306_+	22	22	157544284	157544306	+	Yes	Yes	2553	3444	3160	3500	416.35	463.921	349.331	404.168
chr3:157544284-157544307_+	mmu-miR-186-5p	chr3:157544284-157544306_+	22	23	157544284	157544307	+	Yes	No	1205	1101	1796	1406	196.515	148.309	198.544	162.36
chr3:157544284-157544308_+	mmu-miR-186-5p	chr3:157544284-157544306_+	22	24	157544284	157544308	+	Yes	No	191	149	246	152	31.1488	20.0709	27.1948	17.5524
chr3:157544284-157544309_+	mmu-miR-186-5p	chr3:157544284-157544306_+	22	25	157544284	157544309	+	Yes	No	11	13	51	13	1.79391	1.75115	5.63794	1.50119
chr3:157544284-157544310_+	mmu-miR-186-5p	chr3:157544284-157544306_+	22	26	157544284	157544310	+	Yes	No	8	0	0	0	1.30466	0	0	0
chr3:157544285-157544304_+	mmu-miR-186-5p	chr3:157544284-157544306_+	22	19	157544285	157544304	+	No	No	0	0	12	0	0	0	1.32657	0
chr3:157544285-157544305_+	mmu-miR-186-5p	chr3:157544284-157544306_+	22	20	157544285	157544305	+	No	No	107	134	126	138	17.4498	18.0503	13.929	15.9357
chr3:157544285-157544306_+	mmu-miR-186-5p	chr3:157544284-157544306_+	22	21	157544285	157544306	+	No	Yes	152	165	220	258	24.7886	22.2262	24.3205	29.7929
chr3:157544285-157544307_+	mmu-miR-186-5p	chr3:157544284-157544306_+	22	22	157544285	157544307	+	No	No	79	107	142	118	12.8835	14.4133	15.6978	13.6262
chr3:157544285-157544308_+	mmu-miR-186-5p	chr3:157544284-157544306_+	22	23	157544285	157544308	+	No	No	28	6	12	3	4.56631	0.808225	1.32657	0.346429
chr18:24429106-24429131_-	mmu-miR-187-3p	chr18:24429109-24429131_-	22	25	24429131	24429106	-	Yes	No	5	9	43	77	0.815413	1.21234	4.75356	8.89169
chr18:24429107-24429130_-	mmu-miR-187-3p	chr18:24429109-24429131_-	22	23	24429130	24429107	-	No	No	0	0	10	15	0	0	1.10548	1.73215
chr18:24429107-24429131_-	mmu-miR-187-3p	chr18:24429109-24429131_-	22	24	24429131	24429107	-	Yes	No	39	53	163	300	6.36022	7.13932	18.0193	34.6429
chr18:24429108-24429129_-	mmu-miR-187-3p	chr18:24429109-24429131_-	22	21	24429129	24429108	-	No	No	0	0	0	13	0	0	0	1.50119
chr18:24429108-24429130_-	mmu-miR-187-3p	chr18:24429109-24429131_-	22	22	24429130	24429108	-	No	No	0	4	10	50	0	0.538816	1.10548	5.77382
chr18:24429108-24429131_-	mmu-miR-187-3p	chr18:24429109-24429131_-	22	23	24429131	24429108	-	Yes	No	47	159	573	792	7.66488	21.418	63.3439	91.4573
chr18:24429108-24429132_-	mmu-miR-187-3p	chr18:24429109-24429131_-	22	24	24429132	24429108	-	No	No	0	9	3	7	0	1.21234	0.331644	0.808335
chr18:24429109-24429130_-	mmu-miR-187-3p	chr18:24429109-24429131_-	22	21	24429130	24429109	-	No	Yes	0	0	13	14	0	0	1.43712	1.61667
chr18:24429109-24429131_-	mmu-miR-187-3p	chr18:24429109-24429131_-	22	22	24429131	24429109	-	Yes	Yes	61	90	631	522	9.94804	12.1234	69.7557	60.2787
chr18:24429109-24429132_-	mmu-miR-187-3p	chr18:24429109-24429131_-	22	23	24429132	24429109	-	No	Yes	6	14	83	82	0.978496	1.88586	9.17547	9.46907
chr18:24429110-24429131_-	mmu-miR-187-3p	chr18:24429109-24429131_-	22	21	24429131	24429110	-	Yes	No	40	56	315	490	6.5233	7.54343	34.8226	56.5835
chr18:24429110-24429132_-	mmu-miR-187-3p	chr18:24429109-24429131_-	22	22	24429132	24429110	-	No	No	20	46	237	256	3.26165	6.19639	26.1998	29.562
chr18:24429111-24429131_-	mmu-miR-187-3p	chr18:24429109-24429131_-	22	20	24429131	24429111	-	Yes	No	11	30	126	228	1.79391	4.04112	13.929	26.3286
chr18:24429111-24429132_-	mmu-miR-187-3p	chr18:24429109-24429131_-	22	21	24429132	24429111	-	No	No	7	7	33	69	1.14158	0.942929	3.64808	7.96787
chr18:24429112-24429131_-	mmu-miR-187-3p	chr18:24429109-24429131_-	22	19	24429131	24429112	-	Yes	No	5	4	20	53	0.815413	0.538816	2.21096	6.12025
chr18:24429112-24429132_-	mmu-miR-187-3p	chr18:24429109-24429131_-	22	20	24429132	24429112	-	No	No	2	0	9	17	0.326165	0	0.994931	1.9631
chr18:24429113-24429131_-	mmu-miR-187-3p	chr18:24429109-24429131_-	22	18	24429131	24429113	-	Yes	No	0	0	0	9	0	0	0	1.03929
chr18:24429143-24429166_-	mmu-miR-187-5p	chr18:24429146-24429168_-	22	23	24429166	24429143	-	No	No	0	8	0	17	0	1.07763	0	1.9631
chr18:24429144-24429166_-	mmu-miR-187-5p	chr18:24429146-24429168_-	22	22	24429166	24429144	-	No	No	0	5	0	16	0	0.673521	0	1.84762
chr18:24429144-24429168_-	mmu-miR-187-5p	chr18:24429146-24429168_-	22	24	24429168	24429144	-	Yes	No	0	0	7	8	0	0	0.773835	0.923811
chr18:24429145-24429166_-	mmu-miR-187-5p	chr18:24429146-24429168_-	22	21	24429166	24429145	-	No	No	0	0	3	21	0	0	0.331644	2.42501
chr18:24429145-24429167_-	mmu-miR-187-5p	chr18:24429146-24429168_-	22	22	24429167	24429145	-	No	No	0	0	9	4	0	0	0.994931	0.461906
chr18:24429145-24429168_-	mmu-miR-187-5p	chr18:24429146-24429168_-	22	23	24429168	24429145	-	Yes	No	0	22	10	29	0	2.96349	1.10548	3.34882
chr18:24429146-24429166_-	mmu-miR-187-5p	chr18:24429146-24429168_-	22	20	24429166	24429146	-	No	Yes	0	0	0	10	0	0	0	1.15476
chr18:24429146-24429168_-	mmu-miR-187-5p	chr18:24429146-24429168_-	22	22	24429168	24429146	-	Yes	Yes	1	8	23	15	0.163083	1.07763	2.5426	1.73215
chr18:24429147-24429168_-	mmu-miR-187-5p	chr18:24429146-24429168_-	22	21	24429168	24429147	-	Yes	No	0	0	13	5	0	0	1.43712	0.577382
chrX:7247991-7248012_-	mmu-miR-188-3p	chrX:7247991-7248012_-	21	21	7248012	7247991	-	Yes	Yes	22	41	70	18	3.58782	5.52287	7.73835	2.07858
chrX:7248028-7248051_-	mmu-miR-188-5p	chrX:7248030-7248051_-	21	23	7248051	7248028	-	Yes	No	10	18	14	4	1.63083	2.42467	1.54767	0.461906
chrX:7248029-7248050_-	mmu-miR-188-5p	chrX:7248030-7248051_-	21	21	7248050	7248029	-	No	No	3	13	0	0	0.489248	1.75115	0	0
chrX:7248029-7248051_-	mmu-miR-188-5p	chrX:7248030-7248051_-	21	22	7248051	7248029	-	Yes	No	46	96	95	37	7.5018	12.9316	10.502	4.27263
chrX:7248030-7248051_-	mmu-miR-188-5p	chrX:7248030-7248051_-	21	21	7248051	7248030	-	Yes	Yes	0	10	17	12	0	1.34704	1.87931	1.38572
chr14:115043906-115043928_+	mmu-miR-18a-3p	chr14:115043907-115043929_+	22	22	115043906	115043928	+	No	No	0	0	0	9	0	0	0	1.03929
chr14:115043907-115043928_+	mmu-miR-18a-3p	chr14:115043907-115043929_+	22	21	115043907	115043928	+	Yes	No	0	2	0	28	0	0.269408	0	3.23334
chr14:115043907-115043929_+	mmu-miR-18a-3p	chr14:115043907-115043929_+	22	22	115043907	115043929	+	Yes	Yes	32	80	77	146	5.21864	10.7763	8.51218	16.8596
chr14:115043907-115043930_+	mmu-miR-18a-3p	chr14:115043907-115043929_+	22	23	115043907	115043930	+	Yes	No	43	19	41	54	7.01255	2.55938	4.53246	6.23573
chr14:115043866-115043886_+	mmu-miR-18a-5p	chr14:115043866-115043889_+	23	20	115043866	115043886	+	Yes	No	19	50	36	60	3.09857	6.73521	3.97972	6.92859
chr14:115043866-115043887_+	mmu-miR-18a-5p	chr14:115043866-115043889_+	23	21	115043866	115043887	+	Yes	No	43	76	65	49	7.01255	10.2375	7.18561	5.65835
chr14:115043866-115043888_+	mmu-miR-18a-5p	chr14:115043866-115043889_+	23	22	115043866	115043888	+	Yes	No	73	77	111	92	11.905	10.3722	12.2708	10.6238
chr14:115043866-115043889_+	mmu-miR-18a-5p	chr14:115043866-115043889_+	23	23	115043866	115043889	+	Yes	Yes	153	133	258	164	24.9516	17.9156	28.5213	18.9381
chr14:115043866-115043890_+	mmu-miR-18a-5p	chr14:115043866-115043889_+	23	24	115043866	115043890	+	Yes	No	22	8	36	5	3.58782	1.07763	3.97972	0.577382
chr14:115043867-115043889_+	mmu-miR-18a-5p	chr14:115043866-115043889_+	23	22	115043867	115043889	+	No	Yes	2	4	11	4	0.326165	0.538816	1.21603	0.461906
chr9:67236696-67236721_-	mmu-miR-190a-5p	chr9:67236699-67236721_-	22	25	67236721	67236696	-	Yes	No	9	2	0	0	1.46774	0.269408	0	0
chr9:67236697-67236721_-	mmu-miR-190a-5p	chr9:67236699-67236721_-	22	24	67236721	67236697	-	Yes	No	133	56	37	34	21.69	7.54343	4.09027	3.9262
chr9:67236698-67236721_-	mmu-miR-190a-5p	chr9:67236699-67236721_-	22	23	67236721	67236698	-	Yes	No	11	4	4	6	1.79391	0.538816	0.442191	0.692859
chr9:67236699-67236721_-	mmu-miR-190a-5p	chr9:67236699-67236721_-	22	22	67236721	67236699	-	Yes	Yes	12	0	6	0	1.95699	0	0.663287	0
chr3:90070029-90070051_+	mmu-miR-190b-5p	chr3:90070029-90070051_+	22	22	90070029	90070051	+	Yes	Yes	53	44	138	62	8.64338	5.92698	15.2556	7.15954
chr3:90070029-90070052_+	mmu-miR-190b-5p	chr3:90070029-90070051_+	22	23	90070029	90070052	+	Yes	No	35	19	70	21	5.70789	2.55938	7.73835	2.42501
chr9:108568366-108568386_+	mmu-miR-191-3p	chr9:108568366-108568388_+	22	20	108568366	108568386	+	Yes	No	4	5	2	26	0.65233	0.673521	0.221096	3.00239
chr9:108568366-108568387_+	mmu-miR-191-3p	chr9:108568366-108568388_+	22	21	108568366	108568387	+	Yes	No	15	19	23	47	2.44624	2.55938	2.5426	5.42739
chr9:108568366-108568388_+	mmu-miR-191-3p	chr9:108568366-108568388_+	22	22	108568366	108568388	+	Yes	Yes	54	27	89	38	8.80646	3.63701	9.83876	4.3881
chr9:108568366-108568389_+	mmu-miR-191-3p	chr9:108568366-108568388_+	22	23	108568366	108568389	+	Yes	No	15	0	3	16	2.44624	0	0.331644	1.84762
chr9:108568367-108568385_+	mmu-miR-191-3p	chr9:108568366-108568388_+	22	18	108568367	108568385	+	No	No	0	5	5	8	0	0.673521	0.552739	0.923811
chr9:108568367-108568386_+	mmu-miR-191-3p	chr9:108568366-108568388_+	22	19	108568367	108568386	+	No	No	3	18	9	19	0.489248	2.42467	0.994931	2.19405
chr9:108568367-108568387_+	mmu-miR-191-3p	chr9:108568366-108568388_+	22	20	108568367	108568387	+	No	No	3	1	41	15	0.489248	0.134704	4.53246	1.73215
chr9:108568367-108568388_+	mmu-miR-191-3p	chr9:108568366-108568388_+	22	21	108568367	108568388	+	No	Yes	63	23	114	38	10.2742	3.09819	12.6025	4.3881
chr9:108568367-108568389_+	mmu-miR-191-3p	chr9:108568366-108568388_+	22	22	108568367	108568389	+	No	No	36	14	38	3	5.87097	1.88586	4.20082	0.346429
chr9:108568322-108568347_+	mmu-miR-191-5p	chr9:108568324-108568347_+	23	25	108568322	108568347	+	No	Yes	5	3	13	21	0.815413	0.404112	1.43712	2.42501
chr9:108568323-108568346_+	mmu-miR-191-5p	chr9:108568324-108568347_+	23	23	108568323	108568346	+	No	No	3	32	0	8	0.489248	4.31053	0	0.923811
chr9:108568323-108568347_+	mmu-miR-191-5p	chr9:108568324-108568347_+	23	24	108568323	108568347	+	No	Yes	8	15	68	66	1.30466	2.02056	7.51725	7.62144
chr9:108568324-108568342_+	mmu-miR-191-5p	chr9:108568324-108568347_+	23	18	108568324	108568342	+	Yes	No	2	8	7	19	0.326165	1.07763	0.773835	2.19405
chr9:108568324-108568343_+	mmu-miR-191-5p	chr9:108568324-108568347_+	23	19	108568324	108568343	+	Yes	No	25	23	28	68	4.07706	3.09819	3.09534	7.8524
chr9:108568324-108568344_+	mmu-miR-191-5p	chr9:108568324-108568347_+	23	20	108568324	108568344	+	Yes	No	180	397	409	915	29.3549	53.4775	45.2141	105.661
chr9:108568324-108568345_+	mmu-miR-191-5p	chr9:108568324-108568347_+	23	21	108568324	108568345	+	Yes	No	1522	2004	1483	3827	248.212	269.947	163.942	441.928
chr9:108568324-108568346_+	mmu-miR-191-5p	chr9:108568324-108568347_+	23	22	108568324	108568346	+	Yes	No	5555	8280	10730	14505	905.924	1115.35	1186.18	1674.99
chr9:108568324-108568347_+	mmu-miR-191-5p	chr9:108568324-108568347_+	23	23	108568324	108568347	+	Yes	Yes	156996	191874	322801	371746	25603.3	25846.2	35685	42927.9
chr9:108568324-108568348_+	mmu-miR-191-5p	chr9:108568324-108568347_+	23	24	108568324	108568348	+	Yes	No	4749	5886	8450	11063	774.479	792.868	934.129	1277.52
chr9:108568324-108568349_+	mmu-miR-191-5p	chr9:108568324-108568347_+	23	25	108568324	108568349	+	Yes	No	291	377	687	814	47.457	50.7834	75.9464	93.9978
chr9:108568324-108568350_+	mmu-miR-191-5p	chr9:108568324-108568347_+	23	26	108568324	108568350	+	Yes	No	75	85	229	206	12.2312	11.4498	25.3155	23.7881
chr9:108568324-108568351_+	mmu-miR-191-5p	chr9:108568324-108568347_+	23	27	108568324	108568351	+	Yes	No	27	9	80	36	4.40323	1.21234	8.84383	4.15715
chr9:108568325-108568344_+	mmu-miR-191-5p	chr9:108568324-108568347_+	23	19	108568325	108568344	+	No	No	17	5	9	28	2.7724	0.673521	0.994931	3.23334
chr9:108568325-108568345_+	mmu-miR-191-5p	chr9:108568324-108568347_+	23	20	108568325	108568345	+	No	No	75	63	57	161	12.2312	8.48636	6.30123	18.5917
chr9:108568325-108568346_+	mmu-miR-191-5p	chr9:108568324-108568347_+	23	21	108568325	108568346	+	No	No	173	356	351	506	28.2133	47.9547	38.8023	58.4311
chr9:108568325-108568347_+	mmu-miR-191-5p	chr9:108568324-108568347_+	23	22	108568325	108568347	+	No	Yes	8942	11379	18884	23283	1458.28	1532.8	2087.59	2688.64
chr9:108568325-108568348_+	mmu-miR-191-5p	chr9:108568324-108568347_+	23	23	108568325	108568348	+	No	No	235	355	600	725	38.3244	47.82	66.3287	83.7204
chr9:108568325-108568349_+	mmu-miR-191-5p	chr9:108568324-108568347_+	23	24	108568325	108568349	+	No	No	33	27	69	50	5.38173	3.63701	7.6278	5.77382
chr9:108568325-108568350_+	mmu-miR-191-5p	chr9:108568324-108568347_+	23	25	108568325	108568350	+	No	No	13	0	20	9	2.12007	0	2.21096	1.03929
chr9:108568326-108568347_+	mmu-miR-191-5p	chr9:108568324-108568347_+	23	21	108568326	108568347	+	No	Yes	107	130	197	316	17.4498	17.5115	21.7779	36.4906
chr9:108568326-108568348_+	mmu-miR-191-5p	chr9:108568324-108568347_+	23	22	108568326	108568348	+	No	No	21	21	7	28	3.42473	2.82879	0.773835	3.23334
chr9:108568327-108568347_+	mmu-miR-191-5p	chr9:108568324-108568347_+	23	20	108568327	108568347	+	No	Yes	9	8	12	29	1.46774	1.07763	1.32657	3.34882
chr9:108568328-108568347_+	mmu-miR-191-5p	chr9:108568324-108568347_+	23	19	108568328	108568347	+	No	Yes	0	11	0	2	0	1.48175	0	0.230953
chr9:108568329-108568347_+	mmu-miR-191-5p	chr9:108568324-108568347_+	23	18	108568329	108568347	+	No	Yes	407	554	1073	1565	66.3746	74.6261	118.618	180.721
chr9:108568329-108568348_+	mmu-miR-191-5p	chr9:108568324-108568347_+	23	19	108568329	108568348	+	No	No	12	31	33	32	1.95699	4.17583	3.64808	3.69525
chr9:108568330-108568348_+	mmu-miR-191-5p	chr9:108568324-108568347_+	23	18	108568330	108568348	+	No	No	23	30	25	101	3.7509	4.04112	2.7637	11.6631
chr9:108568331-108568349_+	mmu-miR-191-5p	chr9:108568324-108568347_+	23	18	108568331	108568349	+	No	No	3	3	8	21	0.489248	0.404112	0.884383	2.42501
chr19:6264856-6264874_+	mmu-miR-192-5p	chr19:6264856-6264877_+	21	18	6264856	6264874	+	Yes	No	0	9	0	13	0	1.21234	0	1.50119
chr19:6264856-6264875_+	mmu-miR-192-5p	chr19:6264856-6264877_+	21	19	6264856	6264875	+	Yes	No	0	12	0	15	0	1.61645	0	1.73215
chr19:6264856-6264876_+	mmu-miR-192-5p	chr19:6264856-6264877_+	21	20	6264856	6264876	+	Yes	No	77	121	132	131	12.5574	16.2992	14.5923	15.1274
chr19:6264856-6264877_+	mmu-miR-192-5p	chr19:6264856-6264877_+	21	21	6264856	6264877	+	Yes	Yes	3028	4439	6722	5978	493.814	597.952	743.103	690.318
chr19:6264856-6264878_+	mmu-miR-192-5p	chr19:6264856-6264877_+	21	22	6264856	6264878	+	Yes	No	318	341	468	431	51.8603	45.9341	51.7364	49.7703
chr19:6264856-6264879_+	mmu-miR-192-5p	chr19:6264856-6264877_+	21	23	6264856	6264879	+	Yes	No	68	117	101	98	11.0896	15.7604	11.1653	11.3167
chr19:6264856-6264880_+	mmu-miR-192-5p	chr19:6264856-6264877_+	21	24	6264856	6264880	+	Yes	No	69	107	104	71	11.2527	14.4133	11.497	8.19883
chr19:6264856-6264881_+	mmu-miR-192-5p	chr19:6264856-6264877_+	21	25	6264856	6264881	+	Yes	No	14	0	22	12	2.28316	0	2.43205	1.38572
chr19:6264857-6264876_+	mmu-miR-192-5p	chr19:6264856-6264877_+	21	19	6264857	6264876	+	No	No	18	11	14	22	2.93549	1.48175	1.54767	2.54048
chr19:6264857-6264877_+	mmu-miR-192-5p	chr19:6264856-6264877_+	21	20	6264857	6264877	+	No	Yes	177	253	406	352	28.8656	34.0801	44.8824	40.6477
chr19:6264857-6264878_+	mmu-miR-192-5p	chr19:6264856-6264877_+	21	21	6264857	6264878	+	No	No	48	112	96	135	7.82796	15.0869	10.6126	15.5893
chr19:6264857-6264879_+	mmu-miR-192-5p	chr19:6264856-6264877_+	21	22	6264857	6264879	+	No	No	141	200	214	295	22.9946	26.9408	23.6572	34.0655
chr19:6264857-6264880_+	mmu-miR-192-5p	chr19:6264856-6264877_+	21	23	6264857	6264880	+	No	No	198	303	360	525	32.2904	40.8153	39.7972	60.6251
chr19:6264857-6264881_+	mmu-miR-192-5p	chr19:6264856-6264877_+	21	24	6264857	6264881	+	No	No	0	0	21	25	0	0	2.3215	2.88691
chr19:6264858-6264876_+	mmu-miR-192-5p	chr19:6264856-6264877_+	21	18	6264858	6264876	+	No	No	0	13	0	6	0	1.75115	0	0.692859
chr19:6264858-6264877_+	mmu-miR-192-5p	chr19:6264856-6264877_+	21	19	6264858	6264877	+	No	Yes	3	2	0	9	0.489248	0.269408	0	1.03929
chr19:6264858-6264879_+	mmu-miR-192-5p	chr19:6264856-6264877_+	21	21	6264858	6264879	+	No	No	2	5	4	11	0.326165	0.673521	0.442191	1.27024
chr19:6264858-6264880_+	mmu-miR-192-5p	chr19:6264856-6264877_+	21	22	6264858	6264880	+	No	No	8	9	21	17	1.30466	1.21234	2.3215	1.9631
chr1:160295883-160295907_-	mmu-miR-1927	chr1:160295884-160295907_-	23	24	160295907	160295883	-	Yes	No	2	5	3	12	0.326165	0.673521	0.331644	1.38572
chr1:160295884-160295906_-	mmu-miR-1927	chr1:160295884-160295907_-	23	22	160295906	160295884	-	No	Yes	0	1	5	14	0	0.134704	0.552739	1.61667
chr1:160295884-160295907_-	mmu-miR-1927	chr1:160295884-160295907_-	23	23	160295907	160295884	-	Yes	Yes	38	82	64	172	6.19714	11.0457	7.07506	19.8619
chr1:160295884-160295908_-	mmu-miR-1927	chr1:160295884-160295907_-	23	24	160295908	160295884	-	No	Yes	0	0	10	0	0	0	1.10548	0
chr1:160295885-160295906_-	mmu-miR-1927	chr1:160295884-160295907_-	23	21	160295906	160295885	-	No	No	0	0	0	10	0	0	0	1.15476
chr1:160295885-160295907_-	mmu-miR-1927	chr1:160295884-160295907_-	23	22	160295907	160295885	-	Yes	No	2	17	18	72	0.326165	2.28997	1.98986	8.3143
chr1:160295886-160295907_-	mmu-miR-1927	chr1:160295884-160295907_-	23	21	160295907	160295886	-	Yes	No	2	10	2	49	0.326165	1.34704	0.221096	5.65835
chr1:160295887-160295907_-	mmu-miR-1927	chr1:160295884-160295907_-	23	20	160295907	160295887	-	Yes	No	0	10	0	4	0	1.34704	0	0.461906
chr10:44359691-44359715_+	mmu-miR-1929-5p	chr10:44359691-44359714_+	23	24	44359691	44359715	+	Yes	No	8	5	7	3	1.30466	0.673521	0.773835	0.346429
chr10:44359692-44359713_+	mmu-miR-1929-5p	chr10:44359691-44359714_+	23	21	44359692	44359713	+	No	No	0	5	9	13	0	0.673521	0.994931	1.50119
chr10:44359692-44359715_+	mmu-miR-1929-5p	chr10:44359691-44359714_+	23	23	44359692	44359715	+	No	No	0	5	16	9	0	0.673521	1.76877	1.03929
chr10:77641235-77641257_+	mmu-miR-1930-5p	chr10:77641235-77641257_+	22	22	77641235	77641257	+	Yes	Yes	18	6	36	41	2.93549	0.808225	3.97972	4.73453
chr10:93162878-93162898_+	mmu-miR-1931	chr10:93162878-93162900_+	22	20	93162878	93162898	+	Yes	No	0	0	0	8	0	0	0	0.923811
chr10:93162878-93162900_+	mmu-miR-1931	chr10:93162878-93162900_+	22	22	93162878	93162900	+	Yes	Yes	8	0	0	0	1.30466	0	0	0
chr10:93162878-93162901_+	mmu-miR-1931	chr10:93162878-93162900_+	22	23	93162878	93162901	+	Yes	No	0	10	29	16	0	1.34704	3.20589	1.84762
chr10:93162878-93162902_+	mmu-miR-1931	chr10:93162878-93162900_+	22	24	93162878	93162902	+	Yes	No	14	0	0	0	2.28316	0	0	0
chr10:93162879-93162900_+	mmu-miR-1931	chr10:93162878-93162900_+	22	21	93162879	93162900	+	No	Yes	0	5	12	0	0	0.673521	1.32657	0
chr10:93162879-93162901_+	mmu-miR-1931	chr10:93162878-93162900_+	22	22	93162879	93162901	+	No	No	4	15	4	7	0.65233	2.02056	0.442191	0.808335
chr11:119390523-119390545_+	mmu-miR-1932	chr11:119390523-119390545_+	22	22	119390523	119390545	+	Yes	Yes	9	0	9	4	1.46774	0	0.994931	0.461906
chr11:119390523-119390546_+	mmu-miR-1932	chr11:119390523-119390545_+	22	23	119390523	119390546	+	Yes	No	0	0	26	4	0	0	2.87424	0.461906
chr11:21344599-21344621_-	mmu-miR-1933-3p	chr11:21344599-21344621_-	22	22	21344621	21344599	-	Yes	Yes	0	6	1	8	0	0.808225	0.110548	0.923811
chr11:21344640-21344664_-	mmu-miR-1933-5p	chr11:21344639-21344663_-	24	24	21344664	21344640	-	No	No	12	0	1	4	1.95699	0	0.110548	0.461906
chr11:21344641-21344663_-	mmu-miR-1933-5p	chr11:21344639-21344663_-	24	22	21344663	21344641	-	Yes	No	1	9	14	0	0.163083	1.21234	1.54767	0
chr11:21344641-21344664_-	mmu-miR-1933-5p	chr11:21344639-21344663_-	24	23	21344664	21344641	-	No	No	7	1	8	10	1.14158	0.134704	0.884383	1.15476
chr11:69663091-69663112_+	mmu-miR-1934-3p	chr11:69663091-69663113_+	22	21	69663091	69663112	+	Yes	No	0	2	9	16	0	0.269408	0.994931	1.84762
chr11:69663091-69663113_+	mmu-miR-1934-3p	chr11:69663091-69663113_+	22	22	69663091	69663113	+	Yes	Yes	6	33	45	23	0.978496	4.44524	4.97465	2.65596
chr11:69663091-69663114_+	mmu-miR-1934-3p	chr11:69663091-69663113_+	22	23	69663091	69663114	+	Yes	No	0	5	29	4	0	0.673521	3.20589	0.461906
chr11:69663091-69663115_+	mmu-miR-1934-3p	chr11:69663091-69663113_+	22	24	69663091	69663115	+	Yes	No	3	0	12	8	0.489248	0	1.32657	0.923811
chr11:69663052-69663076_+	mmu-miR-1934-5p	chr11:69663054-69663077_+	23	24	69663052	69663076	+	No	No	0	6	0	10	0	0.808225	0	1.15476
chr11:69663054-69663074_+	mmu-miR-1934-5p	chr11:69663054-69663077_+	23	20	69663054	69663074	+	Yes	No	9	0	4	2	1.46774	0	0.442191	0.230953
chr11:69663054-69663075_+	mmu-miR-1934-5p	chr11:69663054-69663077_+	23	21	69663054	69663075	+	Yes	No	0	8	0	9	0	1.07763	0	1.03929
chr11:69663054-69663076_+	mmu-miR-1934-5p	chr11:69663054-69663077_+	23	22	69663054	69663076	+	Yes	No	8	5	6	9	1.30466	0.673521	0.663287	1.03929
chr11:69663054-69663077_+	mmu-miR-1934-5p	chr11:69663054-69663077_+	23	23	69663054	69663077	+	Yes	Yes	11	6	25	7	1.79391	0.808225	2.7637	0.808335
chr11:69663054-69663078_+	mmu-miR-1934-5p	chr11:69663054-69663077_+	23	24	69663054	69663078	+	Yes	No	8	1	0	0	1.30466	0.134704	0	0
chr12:102684942-102684964_-	mmu-miR-1936	chr12:102684942-102684965_-	23	22	102684964	102684942	-	No	Yes	0	0	16	0	0	0	1.76877	0
chr12:102684942-102684965_-	mmu-miR-1936	chr12:102684942-102684965_-	23	23	102684965	102684942	-	Yes	Yes	27	19	14	28	4.40323	2.55938	1.54767	3.23334
chr12:102684943-102684965_-	mmu-miR-1936	chr12:102684942-102684965_-	23	22	102684965	102684943	-	Yes	No	13	12	24	15	2.12007	1.61645	2.65315	1.73215
chr12:102684944-102684965_-	mmu-miR-1936	chr12:102684942-102684965_-	23	21	102684965	102684944	-	Yes	No	0	9	0	0	0	1.21234	0	0
chr12:40222782-40222803_-	mmu-miR-1938	chr12:40222781-40222803_-	22	21	40222803	40222782	-	Yes	No	0	2	2	8	0	0.269408	0.221096	0.923811
chr11:79712008-79712029_+	mmu-miR-193a-3p	chr11:79712008-79712030_+	22	21	79712008	79712029	+	Yes	No	0	0	4	10	0	0	0.442191	1.15476
chr11:79712008-79712030_+	mmu-miR-193a-3p	chr11:79712008-79712030_+	22	22	79712008	79712030	+	Yes	Yes	12	15	53	32	1.95699	2.02056	5.85904	3.69525
chr11:79711974-79711993_+	mmu-miR-193a-5p	chr11:79711974-79711996_+	22	19	79711974	79711993	+	Yes	No	8	2	0	3	1.30466	0.269408	0	0.346429
chr11:79711974-79711994_+	mmu-miR-193a-5p	chr11:79711974-79711996_+	22	20	79711974	79711994	+	Yes	No	0	0	0	14	0	0	0	1.61667
chr11:79711974-79711995_+	mmu-miR-193a-5p	chr11:79711974-79711996_+	22	21	79711974	79711995	+	Yes	No	93	51	92	222	15.1667	6.86991	10.1704	25.6358
chr11:79711974-79711996_+	mmu-miR-193a-5p	chr11:79711974-79711996_+	22	22	79711974	79711996	+	Yes	Yes	15	18	37	63	2.44624	2.42467	4.09027	7.27502
chr16:13449569-13449590_+	mmu-miR-193b-3p	chr16:13449569-13449591_+	22	21	13449569	13449590	+	Yes	No	16	9	4	8	2.60932	1.21234	0.442191	0.923811
chr16:13449569-13449591_+	mmu-miR-193b-3p	chr16:13449569-13449591_+	22	22	13449569	13449591	+	Yes	Yes	73	199	198	329	11.905	26.8061	21.8885	37.9917
chr16:13449569-13449592_+	mmu-miR-193b-3p	chr16:13449569-13449591_+	22	23	13449569	13449592	+	Yes	No	22	57	74	100	3.58782	7.67813	8.18054	11.5476
chr16:13449569-13449593_+	mmu-miR-193b-3p	chr16:13449569-13449591_+	22	24	13449569	13449593	+	Yes	No	4	30	33	48	0.65233	4.04112	3.64808	5.54287
chr16:13449570-13449591_+	mmu-miR-193b-3p	chr16:13449569-13449591_+	22	21	13449570	13449591	+	No	Yes	4	22	10	18	0.65233	2.96349	1.10548	2.07858
chr16:13449570-13449592_+	mmu-miR-193b-3p	chr16:13449569-13449591_+	22	22	13449570	13449592	+	No	No	3	5	9	5	0.489248	0.673521	0.994931	0.577382
chr16:13449570-13449593_+	mmu-miR-193b-3p	chr16:13449569-13449591_+	22	23	13449570	13449593	+	No	No	0	6	9	3	0	0.808225	0.994931	0.346429
chr16:13449532-13449554_+	mmu-miR-193b-5p	chr16:13449532-13449554_+	22	22	13449532	13449554	+	Yes	Yes	13	0	0	2	2.12007	0	0	0.230953
chr19:6264693-6264713_+	mmu-miR-194-2-3p	chr19:6264693-6264715_+	22	20	6264693	6264713	+	Yes	No	8	9	6	0	1.30466	1.21234	0.663287	0
chr19:6264693-6264714_+	mmu-miR-194-2-3p	chr19:6264693-6264715_+	22	21	6264693	6264714	+	Yes	No	15	6	4	4	2.44624	0.808225	0.442191	0.461906
chr19:6264693-6264715_+	mmu-miR-194-2-3p	chr19:6264693-6264715_+	22	22	6264693	6264715	+	Yes	Yes	20	7	61	35	3.26165	0.942929	6.74342	4.04168
chr19:6264693-6264716_+	mmu-miR-194-2-3p	chr19:6264693-6264715_+	22	23	6264693	6264716	+	Yes	No	27	4	56	15	4.40323	0.538816	6.19068	1.73215
chr19:6264694-6264717_+	mmu-miR-194-2-3p	chr19:6264693-6264715_+	22	23	6264694	6264717	+	No	No	0	1	11	6	0	0.134704	1.21603	0.692859
chr1:185313324-185313342_+	mmu-miR-194-5p	chr1:185313324-185313346_+	22	18	185313324	185313342	+	Yes	No	70	80	91	133	11.4158	10.7763	10.0599	15.3584
chr1:185313324-185313345_+	mmu-miR-194-5p	chr1:185313324-185313346_+	22	21	185313324	185313345	+	Yes	No	19	15	10	15	3.09857	2.02056	1.10548	1.73215
chr1:185313324-185313346_+	mmu-miR-194-5p	chr1:185313324-185313346_+	22	22	185313324	185313346	+	Yes	Yes	127	159	233	243	20.7115	21.418	25.7576	28.0608
chr1:185313324-185313347_+	mmu-miR-194-5p	chr1:185313324-185313346_+	22	23	185313324	185313347	+	Yes	No	8	38	53	55	1.30466	5.11876	5.85904	6.3512
chr1:185313324-185313348_+	mmu-miR-194-5p	chr1:185313324-185313346_+	22	24	185313324	185313348	+	Yes	No	30	23	40	15	4.89248	3.09819	4.42191	1.73215
chr15:79375235-79375256_-	mmu-miR-1943-3p	chr15:79375235-79375256_-	21	21	79375256	79375235	-	Yes	Yes	7	15	9	2	1.14158	2.02056	0.994931	0.230953
chr15:79375236-79375256_-	mmu-miR-1943-3p	chr15:79375235-79375256_-	21	20	79375256	79375236	-	Yes	No	2	0	15	0	0.326165	0	1.65822	0
chr15:79375268-79375292_-	mmu-miR-1943-5p	chr15:79375270-79375293_-	23	24	79375292	79375268	-	No	No	3	9	14	13	0.489248	1.21234	1.54767	1.50119
chr15:79375268-79375293_-	mmu-miR-1943-5p	chr15:79375270-79375293_-	23	25	79375293	79375268	-	Yes	No	0	5	18	1	0	0.673521	1.98986	0.115476
chr15:79375269-79375292_-	mmu-miR-1943-5p	chr15:79375270-79375293_-	23	23	79375292	79375269	-	No	No	22	39	34	68	3.58782	5.25346	3.75863	7.8524
chr15:79375269-79375293_-	mmu-miR-1943-5p	chr15:79375270-79375293_-	23	24	79375293	79375269	-	Yes	No	19	23	17	34	3.09857	3.09819	1.87931	3.9262
chr15:79375270-79375291_-	mmu-miR-1943-5p	chr15:79375270-79375293_-	23	21	79375291	79375270	-	No	Yes	0	6	10	17	0	0.808225	1.10548	1.9631
chr15:79375270-79375292_-	mmu-miR-1943-5p	chr15:79375270-79375293_-	23	22	79375292	79375270	-	No	Yes	212	549	335	801	34.5735	73.9526	37.0335	92.4966
chr15:79375270-79375293_-	mmu-miR-1943-5p	chr15:79375270-79375293_-	23	23	79375293	79375270	-	Yes	Yes	168	334	304	415	27.3979	44.9912	33.6065	47.9227
chr15:79375270-79375294_-	mmu-miR-1943-5p	chr15:79375270-79375293_-	23	24	79375294	79375270	-	No	Yes	6	0	0	10	0.978496	0	0	1.15476
chr15:79375271-79375292_-	mmu-miR-1943-5p	chr15:79375270-79375293_-	23	21	79375292	79375271	-	No	No	41	64	26	95	6.68639	8.62106	2.87424	10.9703
chr15:79375271-79375293_-	mmu-miR-1943-5p	chr15:79375270-79375293_-	23	22	79375293	79375271	-	Yes	No	0	7	0	12	0	0.942929	0	1.38572
chr15:79375272-79375292_-	mmu-miR-1943-5p	chr15:79375270-79375293_-	23	20	79375292	79375272	-	No	No	0	3	0	16	0	0.404112	0	1.84762
chr15:79375274-79375292_-	mmu-miR-1943-5p	chr15:79375270-79375293_-	23	18	79375292	79375274	-	No	No	22	19	0	7	3.58782	2.55938	0	0.808335
chr15:79375274-79375293_-	mmu-miR-1943-5p	chr15:79375270-79375293_-	23	19	79375293	79375274	-	Yes	No	19	34	9	35	3.09857	4.57994	0.994931	4.04168
chr16:11254379-11254400_-	mmu-miR-1945	chr16:11254380-11254402_-	22	21	11254400	11254379	-	No	No	0	15	0	8	0	2.02056	0	0.923811
chr16:11254379-11254401_-	mmu-miR-1945	chr16:11254380-11254402_-	22	22	11254401	11254379	-	No	No	5	16	0	17	0.815413	2.15527	0	1.9631
chr16:11254379-11254402_-	mmu-miR-1945	chr16:11254380-11254402_-	22	23	11254402	11254379	-	Yes	No	6	29	28	51	0.978496	3.90642	3.09534	5.8893
chr16:11254382-11254402_-	mmu-miR-1945	chr16:11254380-11254402_-	22	20	11254402	11254382	-	Yes	No	0	14	0	0	0	1.88586	0	0
chr16:33105374-33105395_+	mmu-miR-1947-5p	chr16:33105374-33105396_+	22	21	33105374	33105395	+	Yes	No	2	14	10	5	0.326165	1.88586	1.10548	0.577382
chr16:33105374-33105396_+	mmu-miR-1947-5p	chr16:33105374-33105396_+	22	22	33105374	33105396	+	Yes	Yes	9	15	39	22	1.46774	2.02056	4.31137	2.54048
chr16:33105374-33105399_+	mmu-miR-1947-5p	chr16:33105374-33105396_+	22	25	33105374	33105399	+	Yes	No	0	0	0	8	0	0	0	0.923811
chr18:12714860-12714881_+	mmu-miR-1948-3p	chr18:12714861-12714883_+	22	21	12714860	12714881	+	No	No	0	10	0	0	0	1.34704	0	0
chr18:12714861-12714880_+	mmu-miR-1948-3p	chr18:12714861-12714883_+	22	19	12714861	12714880	+	Yes	No	0	2	0	9	0	0.269408	0	1.03929
chr18:12714861-12714881_+	mmu-miR-1948-3p	chr18:12714861-12714883_+	22	20	12714861	12714881	+	Yes	No	0	9	8	13	0	1.21234	0.884383	1.50119
chr18:12714861-12714882_+	mmu-miR-1948-3p	chr18:12714861-12714883_+	22	21	12714861	12714882	+	Yes	No	0	21	0	10	0	2.82879	0	1.15476
chr18:12714861-12714883_+	mmu-miR-1948-3p	chr18:12714861-12714883_+	22	22	12714861	12714883	+	Yes	Yes	29	183	61	296	4.7294	24.6509	6.74342	34.181
chr18:12714861-12714884_+	mmu-miR-1948-3p	chr18:12714861-12714883_+	22	23	12714861	12714884	+	Yes	No	2	13	21	14	0.326165	1.75115	2.3215	1.61667
chr18:12714861-12714885_+	mmu-miR-1948-3p	chr18:12714861-12714883_+	22	24	12714861	12714885	+	Yes	No	0	0	0	8	0	0	0	0.923811
chr18:12714862-12714883_+	mmu-miR-1948-3p	chr18:12714861-12714883_+	22	21	12714862	12714883	+	No	Yes	0	6	5	17	0	0.808225	0.552739	1.9631
chr18:12714862-12714884_+	mmu-miR-1948-3p	chr18:12714861-12714883_+	22	22	12714862	12714884	+	No	No	3	7	2	21	0.489248	0.942929	0.221096	2.42501
chr18:12714823-12714845_+	mmu-miR-1948-5p	chr18:12714824-12714845_+	21	22	12714823	12714845	+	No	Yes	0	7	0	8	0	0.942929	0	0.923811
chr18:12714824-12714846_+	mmu-miR-1948-5p	chr18:12714824-12714845_+	21	22	12714824	12714846	+	Yes	No	0	0	0	13	0	0	0	1.50119
chr18:12714825-12714847_+	mmu-miR-1948-5p	chr18:12714824-12714845_+	21	22	12714825	12714847	+	No	No	8	29	5	61	1.30466	3.90642	0.552739	7.04406
chr19:34965401-34965422_+	mmu-miR-1950	chr19:34965401-34965423_+	22	21	34965401	34965422	+	Yes	No	1	0	10	14	0.163083	0	1.10548	1.61667
chr2:151967579-151967602_-	mmu-miR-1953	chr2:151967580-151967602_-	22	23	151967602	151967579	-	Yes	No	2	0	7	8	0.326165	0	0.773835	0.923811
chr2:92192034-92192054_+	mmu-miR-1955-3p	chr2:92192034-92192055_+	21	20	92192034	92192054	+	Yes	No	0	8	0	0	0	1.07763	0	0
chr2:92192034-92192056_+	mmu-miR-1955-3p	chr2:92192034-92192055_+	21	22	92192034	92192056	+	Yes	No	16	52	41	49	2.60932	7.00461	4.53246	5.65835
chr2:92192034-92192057_+	mmu-miR-1955-3p	chr2:92192034-92192055_+	21	23	92192034	92192057	+	Yes	No	0	0	1	11	0	0	0.110548	1.27024
chr3:138526424-138526445_+	mmu-miR-1956	chr3:138526424-138526446_+	22	21	138526424	138526445	+	Yes	No	2	8	0	6	0.326165	1.07763	0	0.692859
chr3:138526424-138526446_+	mmu-miR-1956	chr3:138526424-138526446_+	22	22	138526424	138526446	+	Yes	Yes	9	6	0	12	1.46774	0.808225	0	1.38572
chr3:138526424-138526447_+	mmu-miR-1956	chr3:138526424-138526446_+	22	23	138526424	138526447	+	Yes	No	7	2	0	10	1.14158	0.269408	0	1.15476
chr3:138526424-138526448_+	mmu-miR-1956	chr3:138526424-138526446_+	22	24	138526424	138526448	+	Yes	No	3	15	3	19	0.489248	2.02056	0.331644	2.19405
chr4:48213133-48213155_-	mmu-miR-1958	chr4:48213133-48213155_-	22	22	48213155	48213133	-	Yes	Yes	5	11	13	15	0.815413	1.48175	1.43712	1.73215
chr11:70235100-70235120_+	mmu-miR-195a-3p	chr11:70235099-70235121_+	22	20	70235100	70235120	+	No	No	0	0	0	8	0	0	0	0.923811
chr11:70235061-70235082_+	mmu-miR-195a-5p	chr11:70235061-70235082_+	21	21	70235061	70235082	+	Yes	Yes	24	22	41	24	3.91398	2.96349	4.53246	2.77143
chr11:70235061-70235083_+	mmu-miR-195a-5p	chr11:70235061-70235082_+	21	22	70235061	70235083	+	Yes	No	17	12	11	10	2.7724	1.61645	1.21603	1.15476
chr5:30170750-30170772_+	mmu-miR-1960	chr5:30170750-30170772_+	22	22	30170750	30170772	+	Yes	Yes	12	8	29	5	1.95699	1.07763	3.20589	0.577382
chr7:29773342-29773363_+	mmu-miR-1964-3p	chr7:29773343-29773365_+	22	21	29773342	29773363	+	No	No	0	0	5	10	0	0	0.552739	1.15476
chr7:29773342-29773365_+	mmu-miR-1964-3p	chr7:29773343-29773365_+	22	23	29773342	29773365	+	No	Yes	0	10	10	2	0	1.34704	1.10548	0.230953
chr7:29773343-29773363_+	mmu-miR-1964-3p	chr7:29773343-29773365_+	22	20	29773343	29773363	+	Yes	No	10	59	6	65	1.63083	7.94754	0.663287	7.50597
chr7:29773343-29773364_+	mmu-miR-1964-3p	chr7:29773343-29773365_+	22	21	29773343	29773364	+	Yes	No	4	20	19	40	0.65233	2.69408	2.10041	4.61906
chr7:29773343-29773365_+	mmu-miR-1964-3p	chr7:29773343-29773365_+	22	22	29773343	29773365	+	Yes	Yes	71	99	107	142	11.5789	13.3357	11.8286	16.3977
chr7:29773343-29773366_+	mmu-miR-1964-3p	chr7:29773343-29773365_+	22	23	29773343	29773366	+	Yes	No	25	18	18	17	4.07706	2.42467	1.98986	1.9631
chr7:29773343-29773367_+	mmu-miR-1964-3p	chr7:29773343-29773365_+	22	24	29773343	29773367	+	Yes	No	8	8	7	20	1.30466	1.07763	0.773835	2.30953
chr7:29773344-29773365_+	mmu-miR-1964-3p	chr7:29773343-29773365_+	22	21	29773344	29773365	+	No	Yes	0	4	0	12	0	0.538816	0	1.38572
chr8:105615520-105615544_+	mmu-miR-1966-3p	chr8:105615520-105615543_+	23	24	105615520	105615544	+	Yes	No	3	0	17	0	0.489248	0	1.87931	0
chr8:13189067-13189091_-	mmu-miR-1968-5p	chr8:13189067-13189091_-	24	24	13189091	13189067	-	Yes	Yes	36	34	16	12	5.87097	4.57994	1.76877	1.38572
chr8:13189068-13189091_-	mmu-miR-1968-5p	chr8:13189067-13189091_-	24	23	13189091	13189068	-	Yes	No	11	34	30	5	1.79391	4.57994	3.31644	0.577382
chr8:13189070-13189092_-	mmu-miR-1968-5p	chr8:13189067-13189091_-	24	22	13189092	13189070	-	No	No	0	8	0	0	0	1.07763	0	0
chr8:13189070-13189093_-	mmu-miR-1968-5p	chr8:13189067-13189091_-	24	23	13189093	13189070	-	No	No	8	0	0	0	1.30466	0	0	0
chr6:52230126-52230150_-	mmu-miR-196b-5p	chr6:52230128-52230150_-	22	24	52230150	52230126	-	Yes	No	12	8	4	0	1.95699	1.07763	0.442191	0
chr6:52230127-52230150_-	mmu-miR-196b-5p	chr6:52230128-52230150_-	22	23	52230150	52230127	-	Yes	No	32	46	11	8	5.21864	6.19639	1.21603	0.923811
chr6:52230128-52230150_-	mmu-miR-196b-5p	chr6:52230128-52230150_-	22	22	52230150	52230128	-	Yes	Yes	58	63	6	9	9.45879	8.48636	0.663287	1.03929
chr6:52230129-52230150_-	mmu-miR-196b-5p	chr6:52230128-52230150_-	22	21	52230150	52230129	-	Yes	No	30	24	0	0	4.89248	3.2329	0	0
chr1:184822405-184822428_-	mmu-miR-1981-3p	chr1:184822408-184822429_-	21	23	184822428	184822405	-	No	No	0	4	18	6	0	0.538816	1.98986	0.692859
chr1:184822405-184822429_-	mmu-miR-1981-3p	chr1:184822408-184822429_-	21	24	184822429	184822405	-	Yes	No	3	16	13	1	0.489248	2.15527	1.43712	0.115476
chr1:184822406-184822429_-	mmu-miR-1981-3p	chr1:184822408-184822429_-	21	23	184822429	184822406	-	Yes	No	18	28	32	11	2.93549	3.77171	3.53753	1.27024
chr1:184822407-184822429_-	mmu-miR-1981-3p	chr1:184822408-184822429_-	21	22	184822429	184822407	-	Yes	No	31	44	71	79	5.05556	5.92698	7.8489	9.12264
chr1:184822408-184822428_-	mmu-miR-1981-3p	chr1:184822408-184822429_-	21	20	184822428	184822408	-	No	Yes	11	0	0	5	1.79391	0	0	0.577382
chr1:184822408-184822429_-	mmu-miR-1981-3p	chr1:184822408-184822429_-	21	21	184822429	184822408	-	Yes	Yes	8	12	9	39	1.30466	1.61645	0.994931	4.50358
chr1:184822409-184822429_-	mmu-miR-1981-3p	chr1:184822408-184822429_-	21	20	184822429	184822409	-	Yes	No	8	1	7	28	1.30466	0.134704	0.773835	3.23334
chr1:184822461-184822488_-	mmu-miR-1981-5p	chr1:184822464-184822488_-	24	27	184822488	184822461	-	Yes	No	13	3	7	11	2.12007	0.404112	0.773835	1.27024
chr1:184822462-184822488_-	mmu-miR-1981-5p	chr1:184822464-184822488_-	24	26	184822488	184822462	-	Yes	No	25	25	24	23	4.07706	3.3676	2.65315	2.65596
chr1:184822463-184822488_-	mmu-miR-1981-5p	chr1:184822464-184822488_-	24	25	184822488	184822463	-	Yes	No	135	116	140	96	22.0162	15.6257	15.4767	11.0857
chr1:184822464-184822488_-	mmu-miR-1981-5p	chr1:184822464-184822488_-	24	24	184822488	184822464	-	Yes	Yes	1425	1875	1655	1337	232.393	252.57	182.957	154.392
chr1:184822465-184822487_-	mmu-miR-1981-5p	chr1:184822464-184822488_-	24	22	184822487	184822465	-	No	No	0	10	4	0	0	1.34704	0.442191	0
chr1:184822465-184822488_-	mmu-miR-1981-5p	chr1:184822464-184822488_-	24	23	184822488	184822465	-	Yes	No	971	1484	1338	1556	158.353	199.901	147.913	179.681
chr1:184822466-184822488_-	mmu-miR-1981-5p	chr1:184822464-184822488_-	24	22	184822488	184822466	-	Yes	No	79	168	134	251	12.8835	22.6303	14.8134	28.9846
chr1:184822467-184822488_-	mmu-miR-1981-5p	chr1:184822464-184822488_-	24	21	184822488	184822467	-	Yes	No	22	57	92	72	3.58782	7.67813	10.1704	8.3143
chr1:184822468-184822488_-	mmu-miR-1981-5p	chr1:184822464-184822488_-	24	20	184822488	184822468	-	Yes	No	186	170	44	143	30.3334	22.8997	4.86411	16.5131
chr10:80828847-80828868_+	mmu-miR-1982-3p	chr10:80828847-80828870_+	23	21	80828847	80828868	+	Yes	No	4	10	3	0	0.65233	1.34704	0.331644	0
chr10:80828847-80828869_+	mmu-miR-1982-3p	chr10:80828847-80828870_+	23	22	80828847	80828869	+	Yes	No	15	3	4	16	2.44624	0.404112	0.442191	1.84762
chr10:80828847-80828871_+	mmu-miR-1982-3p	chr10:80828847-80828870_+	23	24	80828847	80828871	+	Yes	No	0	0	6	9	0	0	0.663287	1.03929
chr10:80828849-80828870_+	mmu-miR-1982-3p	chr10:80828847-80828870_+	23	21	80828849	80828870	+	No	Yes	0	0	0	9	0	0	0	1.03929
chr13:21896928-21896949_-	mmu-miR-1983	chr13:21896929-21896950_-	21	21	21896949	21896928	-	No	No	5	6	32	8	0.815413	0.808225	3.53753	0.923811
chr13:21896928-21896950_-	mmu-miR-1983	chr13:21896929-21896950_-	21	22	21896950	21896928	-	Yes	No	6	13	8	28	0.978496	1.75115	0.884383	3.23334
chr13:21896929-21896949_-	mmu-miR-1983	chr13:21896929-21896950_-	21	20	21896949	21896929	-	No	Yes	28	13	20	6	4.56631	1.75115	2.21096	0.692859
chr13:21896929-21896950_-	mmu-miR-1983	chr13:21896929-21896950_-	21	21	21896950	21896929	-	Yes	Yes	117	102	251	108	19.0807	13.7398	27.7475	12.4715
chr13:21896929-21896951_-	mmu-miR-1983	chr13:21896929-21896950_-	21	22	21896951	21896929	-	No	Yes	15	4	0	4	2.44624	0.538816	0	0.461906
chr13:21896930-21896949_-	mmu-miR-1983	chr13:21896929-21896950_-	21	19	21896949	21896930	-	No	No	0	8	10	5	0	1.07763	1.10548	0.577382
chr13:21896930-21896950_-	mmu-miR-1983	chr13:21896929-21896950_-	21	20	21896950	21896930	-	Yes	No	22	17	6	27	3.58782	2.28997	0.663287	3.11786
chr13:21896931-21896950_-	mmu-miR-1983	chr13:21896929-21896950_-	21	19	21896950	21896931	-	Yes	No	2	10	0	0	0.326165	1.34704	0	0
chr9:21496498-21496519_-	mmu-miR-199a-3p	chr9:21496497-21496519_-	22	21	21496519	21496498	-	Yes	No	10	8	0	0	1.63083	1.07763	0	0
chr9:21496498-21496520_-	mmu-miR-199a-3p	chr9:21496497-21496519_-	22	22	21496520	21496498	-	No	No	7	12	0	0	1.14158	1.61645	0	0
chr2:32318523-32318544_+	mmu-miR-199b-3p	chr2:32318523-32318545_+	22	21	32318523	32318544	+	Yes	No	17	6	0	0	2.7724	0.808225	0	0
chr14:115044046-115044067_+	mmu-miR-19a-3p	chr14:115044047-115044070_+	23	21	115044046	115044067	+	No	No	17	0	4	0	2.7724	0	0.442191	0
chr14:115044046-115044068_+	mmu-miR-19a-3p	chr14:115044047-115044070_+	23	22	115044046	115044068	+	No	No	11	10	18	5	1.79391	1.34704	1.98986	0.577382
chr14:115044046-115044069_+	mmu-miR-19a-3p	chr14:115044047-115044070_+	23	23	115044046	115044069	+	No	No	24	18	47	13	3.91398	2.42467	5.19575	1.50119
chr14:115044047-115044067_+	mmu-miR-19a-3p	chr14:115044047-115044070_+	23	20	115044047	115044067	+	Yes	No	62	64	0	69	10.1111	8.62106	0	7.96787
chr14:115044047-115044068_+	mmu-miR-19a-3p	chr14:115044047-115044070_+	23	21	115044047	115044068	+	Yes	No	55	63	168	53	8.96954	8.48636	18.572	6.12025
chr14:115044047-115044069_+	mmu-miR-19a-3p	chr14:115044047-115044070_+	23	22	115044047	115044069	+	Yes	No	918	832	1129	688	149.71	112.074	124.809	79.4478
chr14:115044047-115044070_+	mmu-miR-19a-3p	chr14:115044047-115044070_+	23	23	115044047	115044070	+	Yes	Yes	97	63	170	67	15.819	8.48636	18.7931	7.73692
chr14:115044047-115044071_+	mmu-miR-19a-3p	chr14:115044047-115044070_+	23	24	115044047	115044071	+	Yes	No	6	1	33	5	0.978496	0.134704	3.64808	0.577382
chr14:115044048-115044069_+	mmu-miR-19a-3p	chr14:115044047-115044070_+	23	21	115044048	115044069	+	No	No	27	31	21	19	4.40323	4.17583	2.3215	2.19405
chr14:115044048-115044070_+	mmu-miR-19a-3p	chr14:115044047-115044070_+	23	22	115044048	115044070	+	No	Yes	9	0	3	3	1.46774	0	0.331644	0.346429
chr14:115044011-115044031_+	mmu-miR-19a-5p	chr14:115044011-115044033_+	22	20	115044011	115044031	+	Yes	No	10	5	0	9	1.63083	0.673521	0	1.03929
chr14:115044011-115044032_+	mmu-miR-19a-5p	chr14:115044011-115044033_+	22	21	115044011	115044032	+	Yes	No	0	3	0	12	0	0.404112	0	1.38572
chrX:52741989-52742013_-	mmu-miR-19b-3p	chrX:52741990-52742013_-	23	24	52742013	52741989	-	Yes	No	13	3	0	18	2.12007	0.404112	0	2.07858
chrX:52741990-52742012_-	mmu-miR-19b-3p	chrX:52741990-52742013_-	23	22	52742012	52741990	-	No	Yes	7	8	14	7	1.14158	1.07763	1.54767	0.808335
chrX:52741990-52742013_-	mmu-miR-19b-3p	chrX:52741990-52742013_-	23	23	52742013	52741990	-	Yes	Yes	141	85	241	106	22.9946	11.4498	26.642	12.2405
chrX:52741991-52742012_-	mmu-miR-19b-3p	chrX:52741990-52742013_-	23	21	52742012	52741991	-	No	No	51	59	46	87	8.31721	7.94754	5.0852	10.0464
chrX:52741991-52742013_-	mmu-miR-19b-3p	chrX:52741990-52742013_-	23	22	52742013	52741991	-	Yes	No	1734	1623	2479	1643	282.785	218.625	274.048	189.728
chrX:52741992-52742013_-	mmu-miR-19b-3p	chrX:52741990-52742013_-	23	21	52742013	52741992	-	Yes	No	138	182	216	193	22.5054	24.5161	23.8783	22.287
chrX:52741993-52742013_-	mmu-miR-19b-3p	chrX:52741990-52742013_-	23	20	52742013	52741993	-	Yes	No	93	95	11	95	15.1667	12.7969	1.21603	10.9703
chr18:10785524-10785547_+	mmu-miR-1b-3p	chr18:10785524-10785547_+	23	23	10785524	10785547	+	Yes	Yes	1	7	15	8	0.163083	0.942929	1.65822	0.923811
chr4:156054908-156054932_-	mmu-miR-200a-3p	chr4:156054910-156054932_-	22	24	156054932	156054908	-	Yes	No	4	8	6	5	0.65233	1.07763	0.663287	0.577382
chr4:156054909-156054932_-	mmu-miR-200a-3p	chr4:156054910-156054932_-	22	23	156054932	156054909	-	Yes	No	98	117	92	64	15.9821	15.7604	10.1704	7.39049
chr4:156054910-156054931_-	mmu-miR-200a-3p	chr4:156054910-156054932_-	22	21	156054931	156054910	-	No	Yes	3	11	0	1	0.489248	1.48175	0	0.115476
chr4:156054910-156054932_-	mmu-miR-200a-3p	chr4:156054910-156054932_-	22	22	156054932	156054910	-	Yes	Yes	168	133	81	62	27.3979	17.9156	8.95438	7.15954
chr4:156054911-156054932_-	mmu-miR-200a-3p	chr4:156054910-156054932_-	22	21	156054932	156054911	-	Yes	No	103	276	100	236	16.7975	37.1783	11.0548	27.2524
chr4:156054914-156054932_-	mmu-miR-200a-3p	chr4:156054910-156054932_-	22	18	156054932	156054914	-	Yes	No	0	0	0	8	0	0	0	0.923811
chr4:156054948-156054970_-	mmu-miR-200a-5p	chr4:156054948-156054970_-	22	22	156054970	156054948	-	Yes	Yes	36	81	61	49	5.87097	10.911	6.74342	5.65835
chr4:156054949-156054970_-	mmu-miR-200a-5p	chr4:156054948-156054970_-	22	21	156054970	156054949	-	Yes	No	4	20	5	14	0.65233	2.69408	0.552739	1.61667
chr4:156054952-156054970_-	mmu-miR-200a-5p	chr4:156054948-156054970_-	22	18	156054970	156054952	-	Yes	No	1	0	0	14	0.163083	0	0	1.61667
chr4:156055682-156055705_-	mmu-miR-200b-3p	chr4:156055684-156055706_-	22	23	156055705	156055682	-	No	No	16	23	0	31	2.60932	3.09819	0	3.57977
chr4:156055682-156055706_-	mmu-miR-200b-3p	chr4:156055684-156055706_-	22	24	156055706	156055682	-	Yes	No	69	121	86	87	11.2527	16.2992	9.50712	10.0464
chr4:156055683-156055705_-	mmu-miR-200b-3p	chr4:156055684-156055706_-	22	22	156055705	156055683	-	No	No	15	9	34	3	2.44624	1.21234	3.75863	0.346429
chr4:156055683-156055706_-	mmu-miR-200b-3p	chr4:156055684-156055706_-	22	23	156055706	156055683	-	Yes	No	577	717	373	299	94.0987	96.5828	41.2343	34.5275
chr4:156055684-156055706_-	mmu-miR-200b-3p	chr4:156055684-156055706_-	22	22	156055706	156055684	-	Yes	Yes	24	48	52	30	3.91398	6.4658	5.74849	3.46429
chr4:156055687-156055706_-	mmu-miR-200b-3p	chr4:156055684-156055706_-	22	19	156055706	156055687	-	Yes	No	13	0	0	12	2.12007	0	0	1.38572
chr6:124718321-124718346_-	mmu-miR-200c-3p	chr6:124718323-124718346_-	23	25	124718346	124718321	-	Yes	No	24	13	11	26	3.91398	1.75115	1.21603	3.00239
chr6:124718322-124718346_-	mmu-miR-200c-3p	chr6:124718323-124718346_-	23	24	124718346	124718322	-	Yes	No	45	26	68	54	7.33872	3.50231	7.51725	6.23573
chr6:124718323-124718346_-	mmu-miR-200c-3p	chr6:124718323-124718346_-	23	23	124718346	124718323	-	Yes	Yes	159	169	279	250	25.9301	22.765	30.8429	28.8691
chr6:124718324-124718345_-	mmu-miR-200c-3p	chr6:124718323-124718346_-	23	21	124718345	124718324	-	No	No	2	0	3	8	0.326165	0	0.331644	0.923811
chr6:124718324-124718346_-	mmu-miR-200c-3p	chr6:124718323-124718346_-	23	22	124718346	124718324	-	Yes	No	161	244	300	386	26.2563	32.8678	33.1644	44.5739
chr6:124718324-124718347_-	mmu-miR-200c-3p	chr6:124718323-124718346_-	23	23	124718347	124718324	-	No	No	0	0	0	8	0	0	0	0.923811
chr6:124718325-124718346_-	mmu-miR-200c-3p	chr6:124718323-124718346_-	23	21	124718346	124718325	-	Yes	No	0	63	19	19	0	8.48636	2.10041	2.19405
chr6:124718326-124718346_-	mmu-miR-200c-3p	chr6:124718323-124718346_-	23	20	124718346	124718326	-	Yes	No	0	3	0	12	0	0.404112	0	1.38572
chr6:124718327-124718346_-	mmu-miR-200c-3p	chr6:124718323-124718346_-	23	19	124718346	124718327	-	Yes	No	32	84	35	73	5.21864	11.3151	3.86917	8.42978
chr12:112130926-112130946_+	mmu-miR-203-3p	chr12:112130926-112130948_+	22	20	112130926	112130946	+	Yes	No	0	19	13	9	0	2.55938	1.43712	1.03929
chr12:112130926-112130948_+	mmu-miR-203-3p	chr12:112130926-112130948_+	22	22	112130926	112130948	+	Yes	Yes	13	27	56	44	2.12007	3.63701	6.19068	5.08096
chr12:112130926-112130949_+	mmu-miR-203-3p	chr12:112130926-112130948_+	22	23	112130926	112130949	+	Yes	No	6	9	7	3	0.978496	1.21234	0.773835	0.346429
chr12:112130927-112130946_+	mmu-miR-203-3p	chr12:112130926-112130948_+	22	19	112130927	112130946	+	No	No	0	17	4	8	0	2.28997	0.442191	0.923811
chr12:112130927-112130948_+	mmu-miR-203-3p	chr12:112130926-112130948_+	22	21	112130927	112130948	+	No	Yes	9	64	45	27	1.46774	8.62106	4.97465	3.11786
chr12:112130927-112130949_+	mmu-miR-203-3p	chr12:112130926-112130948_+	22	22	112130927	112130949	+	No	No	8	31	28	25	1.30466	4.17583	3.09534	2.88691
chr1:20679054-20679076_+	mmu-miR-206-3p	chr1:20679054-20679076_+	22	22	20679054	20679076	+	Yes	Yes	0	8	0	0	0	1.07763	0	0
chr14:54975710-54975731_-	mmu-miR-208b-3p	chr14:54975709-54975731_-	22	21	54975731	54975710	-	Yes	No	0	0	9	7	0	0	0.994931	0.808335
chr14:115044218-115044240_+	mmu-miR-20a-3p	chr14:115044218-115044240_+	22	22	115044218	115044240	+	Yes	Yes	2	2	0	19	0.326165	0.269408	0	2.19405
chr14:115044218-115044241_+	mmu-miR-20a-3p	chr14:115044218-115044240_+	22	23	115044218	115044241	+	Yes	No	25	5	41	15	4.07706	0.673521	4.53246	1.73215
chr14:115044219-115044241_+	mmu-miR-20a-3p	chr14:115044218-115044240_+	22	22	115044219	115044241	+	No	No	9	9	11	7	1.46774	1.21234	1.21603	0.808335
chr14:115044182-115044202_+	mmu-miR-20a-5p	chr14:115044182-115044205_+	23	20	115044182	115044202	+	Yes	No	286	295	6	431	46.6416	39.7377	0.663287	49.7703
chr14:115044182-115044203_+	mmu-miR-20a-5p	chr14:115044182-115044205_+	23	21	115044182	115044203	+	Yes	No	36	42	28	62	5.87097	5.65757	3.09534	7.15954
chr14:115044182-115044204_+	mmu-miR-20a-5p	chr14:115044182-115044205_+	23	22	115044182	115044204	+	Yes	No	60	101	104	106	9.78496	13.6051	11.497	12.2405
chr14:115044182-115044205_+	mmu-miR-20a-5p	chr14:115044182-115044205_+	23	23	115044182	115044205	+	Yes	Yes	3077	3074	5164	3587	501.805	414.08	570.869	414.214
chr14:115044182-115044206_+	mmu-miR-20a-5p	chr14:115044182-115044205_+	23	24	115044182	115044206	+	Yes	No	314	314	533	383	51.2079	42.2971	58.922	44.2275
chr14:115044182-115044207_+	mmu-miR-20a-5p	chr14:115044182-115044205_+	23	25	115044182	115044207	+	Yes	No	16	12	13	15	2.60932	1.61645	1.43712	1.73215
chr14:115044182-115044208_+	mmu-miR-20a-5p	chr14:115044182-115044205_+	23	26	115044182	115044208	+	Yes	No	4	1	23	11	0.65233	0.134704	2.5426	1.27024
chr14:115044183-115044202_+	mmu-miR-20a-5p	chr14:115044182-115044205_+	23	19	115044183	115044202	+	No	No	1	4	0	9	0.163083	0.538816	0	1.03929
chr14:115044183-115044205_+	mmu-miR-20a-5p	chr14:115044182-115044205_+	23	22	115044183	115044205	+	No	Yes	75	65	87	81	12.2312	8.75577	9.61766	9.35359
chr14:115044183-115044206_+	mmu-miR-20a-5p	chr14:115044182-115044205_+	23	23	115044183	115044206	+	No	No	4	7	11	4	0.65233	0.942929	1.21603	0.461906
chr7:141221403-141221427_-	mmu-miR-210-3p	chr7:141221406-141221428_-	22	24	141221427	141221403	-	No	No	6	14	0	5	0.978496	1.88586	0	0.577382
chr7:141221403-141221428_-	mmu-miR-210-3p	chr7:141221406-141221428_-	22	25	141221428	141221403	-	Yes	No	427	340	124	54	69.6363	45.7994	13.7079	6.23573
chr7:141221404-141221427_-	mmu-miR-210-3p	chr7:141221406-141221428_-	22	23	141221427	141221404	-	No	No	22	53	6	0	3.58782	7.13932	0.663287	0
chr7:141221404-141221428_-	mmu-miR-210-3p	chr7:141221406-141221428_-	22	24	141221428	141221404	-	Yes	No	1478	1439	195	153	241.036	193.839	21.5568	17.6679
chr7:141221404-141221429_-	mmu-miR-210-3p	chr7:141221406-141221428_-	22	25	141221429	141221404	-	No	No	45	55	2	15	7.33872	7.40873	0.221096	1.73215
chr7:141221405-141221427_-	mmu-miR-210-3p	chr7:141221406-141221428_-	22	22	141221427	141221405	-	No	No	55	116	9	4	8.96954	15.6257	0.994931	0.461906
chr7:141221405-141221428_-	mmu-miR-210-3p	chr7:141221406-141221428_-	22	23	141221428	141221405	-	Yes	No	2670	2987	434	234	435.431	402.361	47.9778	27.0215
chr7:141221405-141221429_-	mmu-miR-210-3p	chr7:141221406-141221428_-	22	24	141221429	141221405	-	No	No	96	175	15	18	15.6559	23.5732	1.65822	2.07858
chr7:141221406-141221427_-	mmu-miR-210-3p	chr7:141221406-141221428_-	22	21	141221427	141221406	-	No	Yes	689	647	121	69	112.364	87.1536	13.3763	7.96787
chr7:141221406-141221428_-	mmu-miR-210-3p	chr7:141221406-141221428_-	22	22	141221428	141221406	-	Yes	Yes	30955	37923	4668	2110	5048.22	5108.38	516.037	243.655
chr7:141221406-141221429_-	mmu-miR-210-3p	chr7:141221406-141221428_-	22	23	141221429	141221406	-	No	Yes	2028	3470	522	277	330.732	467.423	57.706	31.987
chr7:141221407-141221427_-	mmu-miR-210-3p	chr7:141221406-141221428_-	22	20	141221427	141221407	-	No	No	65	118	7	6	10.6004	15.8951	0.773835	0.692859
chr7:141221407-141221428_-	mmu-miR-210-3p	chr7:141221406-141221428_-	22	21	141221428	141221407	-	Yes	No	3257	6602	540	359	531.16	889.316	59.6958	41.456
chr7:141221407-141221429_-	mmu-miR-210-3p	chr7:141221406-141221428_-	22	22	141221429	141221407	-	No	No	372	1026	67	46	60.6667	138.206	7.40671	5.31192
chr7:141221408-141221427_-	mmu-miR-210-3p	chr7:141221406-141221428_-	22	19	141221427	141221408	-	No	No	4	21	0	6	0.65233	2.82879	0	0.692859
chr7:141221408-141221428_-	mmu-miR-210-3p	chr7:141221406-141221428_-	22	20	141221428	141221408	-	Yes	No	232	704	76	83	37.8352	94.8317	8.40164	9.58454
chr7:141221408-141221429_-	mmu-miR-210-3p	chr7:141221406-141221428_-	22	21	141221429	141221408	-	No	No	9	51	4	0	1.46774	6.86991	0.442191	0
chr7:141221409-141221427_-	mmu-miR-210-3p	chr7:141221406-141221428_-	22	18	141221427	141221409	-	No	No	14	12	1	0	2.28316	1.61645	0.110548	0
chr7:141221409-141221428_-	mmu-miR-210-3p	chr7:141221406-141221428_-	22	19	141221428	141221409	-	Yes	No	553	776	18	98	90.1847	104.53	1.98986	11.3167
chr7:141221409-141221429_-	mmu-miR-210-3p	chr7:141221406-141221428_-	22	20	141221429	141221409	-	No	No	45	35	5	3	7.33872	4.71464	0.552739	0.346429
chr7:141221410-141221428_-	mmu-miR-210-3p	chr7:141221406-141221428_-	22	18	141221428	141221410	-	Yes	No	8	41	0	0	1.30466	5.52287	0	0
chr7:141221410-141221429_-	mmu-miR-210-3p	chr7:141221406-141221428_-	22	19	141221429	141221410	-	No	No	1	16	0	0	0.163083	2.15527	0	0
chr7:141221443-141221466_-	mmu-miR-210-5p	chr7:141221444-141221466_-	22	23	141221466	141221443	-	Yes	No	24	55	3	9	3.91398	7.40873	0.331644	1.03929
chr7:141221444-141221462_-	mmu-miR-210-5p	chr7:141221444-141221466_-	22	18	141221462	141221444	-	No	Yes	0	10	0	0	0	1.34704	0	0
chr7:141221444-141221465_-	mmu-miR-210-5p	chr7:141221444-141221466_-	22	21	141221465	141221444	-	No	Yes	21	75	5	0	3.42473	10.1028	0.552739	0
chr7:141221444-141221466_-	mmu-miR-210-5p	chr7:141221444-141221466_-	22	22	141221466	141221444	-	Yes	Yes	270	1157	35	79	44.0323	155.853	3.86917	9.12264
chr7:141221445-141221466_-	mmu-miR-210-5p	chr7:141221444-141221466_-	22	21	141221466	141221445	-	Yes	No	14	96	1	2	2.28316	12.9316	0.110548	0.230953
chr7:141221446-141221466_-	mmu-miR-210-5p	chr7:141221444-141221466_-	22	20	141221466	141221446	-	Yes	No	5	14	0	0	0.815413	1.88586	0	0
chr11:75173442-75173461_+	mmu-miR-212-3p	chr11:75173442-75173464_+	22	19	75173442	75173461	+	Yes	No	0	21	3	1	0	2.82879	0.331644	0.115476
chr11:75173442-75173462_+	mmu-miR-212-3p	chr11:75173442-75173464_+	22	20	75173442	75173462	+	Yes	No	10	51	17	74	1.63083	6.86991	1.87931	8.54526
chr11:75173442-75173463_+	mmu-miR-212-3p	chr11:75173442-75173464_+	22	21	75173442	75173463	+	Yes	No	142	293	235	260	23.1577	39.4683	25.9787	30.0239
chr11:75173442-75173464_+	mmu-miR-212-3p	chr11:75173442-75173464_+	22	22	75173442	75173464	+	Yes	Yes	9	58	58	42	1.46774	7.81284	6.41178	4.85001
chr11:75173442-75173465_+	mmu-miR-212-3p	chr11:75173442-75173464_+	22	23	75173442	75173465	+	Yes	No	29	59	46	18	4.7294	7.94754	5.0852	2.07858
chr11:75173442-75173466_+	mmu-miR-212-3p	chr11:75173442-75173464_+	22	24	75173442	75173466	+	Yes	No	15	34	42	31	2.44624	4.57994	4.64301	3.57977
chr11:75173402-75173424_+	mmu-miR-212-5p	chr11:75173402-75173425_+	23	22	75173402	75173424	+	Yes	No	18	5	13	19	2.93549	0.673521	1.43712	2.19405
chr11:75173402-75173425_+	mmu-miR-212-5p	chr11:75173402-75173425_+	23	23	75173402	75173425	+	Yes	Yes	160	395	490	497	26.0932	53.2081	54.1684	57.3918
chr11:75173402-75173426_+	mmu-miR-212-5p	chr11:75173402-75173425_+	23	24	75173402	75173426	+	Yes	No	14	54	22	31	2.28316	7.27402	2.43205	3.57977
chr11:75173402-75173427_+	mmu-miR-212-5p	chr11:75173402-75173425_+	23	25	75173402	75173427	+	Yes	No	4	13	24	7	0.65233	1.75115	2.65315	0.808335
chr11:75173403-75173425_+	mmu-miR-212-5p	chr11:75173402-75173425_+	23	22	75173403	75173425	+	No	Yes	13	29	31	53	2.12007	3.90642	3.42698	6.12025
chr11:75173403-75173426_+	mmu-miR-212-5p	chr11:75173402-75173425_+	23	23	75173403	75173426	+	No	No	5	32	30	48	0.815413	4.31053	3.31644	5.54287
chr11:75173403-75173427_+	mmu-miR-212-5p	chr11:75173402-75173425_+	23	24	75173403	75173427	+	No	No	1	9	6	10	0.163083	1.21234	0.663287	1.15476
chr1:162223437-162223459_+	mmu-miR-214-3p	chr1:162223437-162223459_+	22	22	162223437	162223459	+	Yes	Yes	8	0	0	0	1.30466	0	0	0
chr1:185313609-185313630_+	mmu-miR-215-5p	chr1:185313609-185313630_+	21	21	185313609	185313630	+	Yes	Yes	1	8	1	2	0.163083	1.07763	0.110548	0.230953
chr1:185313609-185313631_+	mmu-miR-215-5p	chr1:185313609-185313630_+	21	22	185313609	185313631	+	Yes	No	17	22	16	7	2.7724	2.96349	1.76877	0.808335
chr17:34025006-34025031_-	mmu-miR-219a-1-3p	chr17:34025009-34025031_-	22	25	34025031	34025006	-	Yes	No	8	4	21	5	1.30466	0.538816	2.3215	0.577382
chr17:34025007-34025031_-	mmu-miR-219a-1-3p	chr17:34025009-34025031_-	22	24	34025031	34025007	-	Yes	No	8	4	3	10	1.30466	0.538816	0.331644	1.15476
chr17:34025008-34025031_-	mmu-miR-219a-1-3p	chr17:34025009-34025031_-	22	23	34025031	34025008	-	Yes	No	57	31	118	115	9.29571	4.17583	13.0446	13.2798
chr17:34025009-34025031_-	mmu-miR-219a-1-3p	chr17:34025009-34025031_-	22	22	34025031	34025009	-	Yes	Yes	60	37	119	64	9.78496	4.98405	13.1552	7.39049
chr17:34025010-34025031_-	mmu-miR-219a-1-3p	chr17:34025009-34025031_-	22	21	34025031	34025010	-	Yes	No	3	0	10	0	0.489248	0	1.10548	0
chr17:34025011-34025031_-	mmu-miR-219a-1-3p	chr17:34025009-34025031_-	22	20	34025031	34025011	-	Yes	No	7	0	7	9	1.14158	0	0.773835	1.03929
chr17:34025012-34025031_-	mmu-miR-219a-1-3p	chr17:34025009-34025031_-	22	19	34025031	34025012	-	Yes	No	3	3	0	12	0.489248	0.404112	0	1.38572
chr17:34025048-34025070_+	mmu-miR-219c-3p	chr17:34025049-34025071_+	22	22	34025048	34025070	+	No	No	11	3	9	0	1.79391	0.404112	0.994931	0
chr17:34025011-34025033_+	mmu-miR-219c-5p	chr17:34025011-34025033_+	22	22	34025011	34025033	+	Yes	Yes	0	0	0	12	0	0	0	1.38572
chr11:86584078-86584101_-	mmu-miR-21a-3p	chr11:86584081-86584103_-	22	23	86584101	86584078	-	No	No	11	1	2	8	1.79391	0.134704	0.221096	0.923811
chr11:86584078-86584102_-	mmu-miR-21a-3p	chr11:86584081-86584103_-	22	24	86584102	86584078	-	No	No	1	8	4	0	0.163083	1.07763	0.442191	0
chr11:86584078-86584103_-	mmu-miR-21a-3p	chr11:86584081-86584103_-	22	25	86584103	86584078	-	Yes	No	5	8	0	6	0.815413	1.07763	0	0.692859
chr11:86584079-86584101_-	mmu-miR-21a-3p	chr11:86584081-86584103_-	22	22	86584101	86584079	-	No	No	1	0	12	6	0.163083	0	1.32657	0.692859
chr11:86584079-86584102_-	mmu-miR-21a-3p	chr11:86584081-86584103_-	22	23	86584102	86584079	-	No	No	0	0	10	6	0	0	1.10548	0.692859
chr11:86584079-86584103_-	mmu-miR-21a-3p	chr11:86584081-86584103_-	22	24	86584103	86584079	-	Yes	No	10	12	27	10	1.63083	1.61645	2.98479	1.15476
chr11:86584080-86584100_-	mmu-miR-21a-3p	chr11:86584081-86584103_-	22	20	86584100	86584080	-	No	No	8	0	4	12	1.30466	0	0.442191	1.38572
chr11:86584080-86584101_-	mmu-miR-21a-3p	chr11:86584081-86584103_-	22	21	86584101	86584080	-	No	No	727	346	947	186	118.561	46.6076	104.689	21.4786
chr11:86584080-86584102_-	mmu-miR-21a-3p	chr11:86584081-86584103_-	22	22	86584102	86584080	-	No	No	810	505	718	271	132.097	68.0256	79.3734	31.2941
chr11:86584080-86584103_-	mmu-miR-21a-3p	chr11:86584081-86584103_-	22	23	86584103	86584080	-	Yes	No	670	285	483	186	109.265	38.3907	53.3946	21.4786
chr11:86584081-86584099_-	mmu-miR-21a-3p	chr11:86584081-86584103_-	22	18	86584099	86584081	-	No	Yes	0	13	0	0	0	1.75115	0	0
chr11:86584081-86584101_-	mmu-miR-21a-3p	chr11:86584081-86584103_-	22	20	86584101	86584081	-	No	Yes	26	59	24	28	4.24015	7.94754	2.65315	3.23334
chr11:86584081-86584102_-	mmu-miR-21a-3p	chr11:86584081-86584103_-	22	21	86584102	86584081	-	No	Yes	46	108	67	47	7.5018	14.548	7.40671	5.42739
chr11:86584081-86584103_-	mmu-miR-21a-3p	chr11:86584081-86584103_-	22	22	86584103	86584081	-	Yes	Yes	1239	2083	1207	647	202.059	280.589	133.431	74.7133
chr11:86584082-86584101_-	mmu-miR-21a-3p	chr11:86584081-86584103_-	22	19	86584101	86584082	-	No	No	48	101	38	31	7.82796	13.6051	4.20082	3.57977
chr11:86584082-86584102_-	mmu-miR-21a-3p	chr11:86584081-86584103_-	22	20	86584102	86584082	-	No	No	328	550	395	220	53.4911	74.0873	43.6664	25.4048
chr11:86584082-86584103_-	mmu-miR-21a-3p	chr11:86584081-86584103_-	22	21	86584103	86584082	-	Yes	No	12429	20971	11896	6904	2026.95	2824.88	1315.08	797.249
chr11:86584082-86584104_-	mmu-miR-21a-3p	chr11:86584081-86584103_-	22	22	86584104	86584082	-	No	No	1	18	2	6	0.163083	2.42467	0.221096	0.692859
chr11:86584082-86584106_-	mmu-miR-21a-3p	chr11:86584081-86584103_-	22	24	86584106	86584082	-	No	No	0	0	10	5	0	0	1.10548	0.577382
chr11:86584083-86584101_-	mmu-miR-21a-3p	chr11:86584081-86584103_-	22	18	86584101	86584083	-	No	No	1	47	3	19	0.163083	6.33109	0.331644	2.19405
chr11:86584083-86584102_-	mmu-miR-21a-3p	chr11:86584081-86584103_-	22	19	86584102	86584083	-	No	No	1	75	24	30	0.163083	10.1028	2.65315	3.46429
chr11:86584083-86584103_-	mmu-miR-21a-3p	chr11:86584081-86584103_-	22	20	86584103	86584083	-	Yes	No	251	1643	341	689	40.9337	221.319	37.6968	79.5633
chr11:86584084-86584102_-	mmu-miR-21a-3p	chr11:86584081-86584103_-	22	18	86584102	86584084	-	No	No	5	17	17	14	0.815413	2.28997	1.87931	1.61667
chr11:86584084-86584103_-	mmu-miR-21a-3p	chr11:86584081-86584103_-	22	19	86584103	86584084	-	Yes	No	112	485	174	209	18.2653	65.3315	19.2353	24.1346
chr11:86584085-86584103_-	mmu-miR-21a-3p	chr11:86584081-86584103_-	22	18	86584103	86584085	-	Yes	No	423	1386	335	471	68.9839	186.7	37.0335	54.3894
chr11:86584101-86584120_-	mmu-miR-21a-3p	chr11:86584081-86584103_-	22	19	86584120	86584101	-	No	No	8	0	0	0	1.30466	0	0	0
chr11:86584123-86584141_-	mmu-miR-21a-5p	chr11:86584119-86584141_-	22	18	86584141	86584123	-	Yes	No	8332	9865	110	11284	1358.8	1328.86	12.1603	1303.04
chr11:86584122-86584141_-	mmu-miR-21a-5p	chr11:86584119-86584141_-	22	19	86584141	86584122	-	Yes	No	28432	32587	687	32997	4636.76	4389.6	75.9464	3810.38
chr11:86584121-86584141_-	mmu-miR-21a-5p	chr11:86584119-86584141_-	22	20	86584141	86584121	-	Yes	No	1274	1320	1450	1613	207.767	177.809	160.294	186.263
chr11:86584120-86584141_-	mmu-miR-21a-5p	chr11:86584119-86584141_-	22	21	86584141	86584120	-	Yes	No	82902	87232	113681	93823	13519.9	11750.5	12567.2	10834.3
chr11:86584119-86584141_-	mmu-miR-21a-5p	chr11:86584119-86584141_-	22	22	86584141	86584119	-	Yes	Yes	560970	568876	671180	533579	91484.4	76629.9	74197.5	61615.8
chr11:86584118-86584141_-	mmu-miR-21a-5p	chr11:86584119-86584141_-	22	23	86584141	86584118	-	Yes	No	916500	827044	896190	538494	149465	111406	99071.9	62183.4
chr11:86584117-86584141_-	mmu-miR-21a-5p	chr11:86584119-86584141_-	22	24	86584141	86584117	-	Yes	No	232432	270831	260402	175867	37905.6	36482	28786.9	20308.5
chr11:86584116-86584141_-	mmu-miR-21a-5p	chr11:86584119-86584141_-	22	25	86584141	86584116	-	Yes	No	563	584	595	498	91.8155	78.6672	65.776	57.5073
chr11:86584115-86584141_-	mmu-miR-21a-5p	chr11:86584119-86584141_-	22	26	86584141	86584115	-	Yes	No	58	75	75	50	9.45879	10.1028	8.29109	5.77382
chr11:86584114-86584141_-	mmu-miR-21a-5p	chr11:86584119-86584141_-	22	27	86584141	86584114	-	Yes	No	24	95	29	59	3.91398	12.7969	3.20589	6.81311
chr11:86584113-86584141_-	mmu-miR-21a-5p	chr11:86584119-86584141_-	22	28	86584141	86584113	-	Yes	No	0	6	2	27	0	0.808225	0.221096	3.11786
chr11:86584112-86584141_-	mmu-miR-21a-5p	chr11:86584119-86584141_-	22	29	86584141	86584112	-	Yes	No	3	4	1	8	0.489248	0.538816	0.110548	0.923811
chr11:86584114-86584136_-	mmu-miR-21a-5p	chr11:86584119-86584141_-	22	22	86584136	86584114	-	No	No	17	14	0	0	2.7724	1.88586	0	0
chr11:86584116-86584140_-	mmu-miR-21a-5p	chr11:86584119-86584141_-	22	24	86584140	86584116	-	No	No	11	12	10	8	1.79391	1.61645	1.10548	0.923811
chr11:86584116-86584142_-	mmu-miR-21a-5p	chr11:86584119-86584141_-	22	26	86584142	86584116	-	No	No	1	5	12	5	0.163083	0.673521	1.32657	0.577382
chr11:86584117-86584135_-	mmu-miR-21a-5p	chr11:86584119-86584141_-	22	18	86584135	86584117	-	No	No	1	8	9	4	0.163083	1.07763	0.994931	0.461906
chr11:86584117-86584136_-	mmu-miR-21a-5p	chr11:86584119-86584141_-	22	19	86584136	86584117	-	No	No	5	13	27	17	0.815413	1.75115	2.98479	1.9631
chr11:86584117-86584137_-	mmu-miR-21a-5p	chr11:86584119-86584141_-	22	20	86584137	86584117	-	No	No	26	36	33	50	4.24015	4.84935	3.64808	5.77382
chr11:86584117-86584138_-	mmu-miR-21a-5p	chr11:86584119-86584141_-	22	21	86584138	86584117	-	No	No	21	9	5	16	3.42473	1.21234	0.552739	1.84762
chr11:86584117-86584139_-	mmu-miR-21a-5p	chr11:86584119-86584141_-	22	22	86584139	86584117	-	No	No	277	270	204	252	45.1739	36.3701	22.5518	29.1001
chr11:86584117-86584140_-	mmu-miR-21a-5p	chr11:86584119-86584141_-	22	23	86584140	86584117	-	No	No	3356	3706	3450	2950	547.305	499.213	381.39	340.655
chr11:86584117-86584142_-	mmu-miR-21a-5p	chr11:86584119-86584141_-	22	25	86584142	86584117	-	No	No	560	804	806	683	91.3263	108.302	89.1016	78.8704
chr11:86584117-86584143_-	mmu-miR-21a-5p	chr11:86584119-86584141_-	22	26	86584143	86584117	-	No	No	5	8	14	12	0.815413	1.07763	1.54767	1.38572
chr11:86584118-86584136_-	mmu-miR-21a-5p	chr11:86584119-86584141_-	22	18	86584136	86584118	-	No	No	30	37	19	25	4.89248	4.98405	2.10041	2.88691
chr11:86584118-86584137_-	mmu-miR-21a-5p	chr11:86584119-86584141_-	22	19	86584137	86584118	-	No	No	68	91	60	65	11.0896	12.2581	6.63287	7.50597
chr11:86584118-86584138_-	mmu-miR-21a-5p	chr11:86584119-86584141_-	22	20	86584138	86584118	-	No	No	58	43	19	25	9.45879	5.79228	2.10041	2.88691
chr11:86584118-86584139_-	mmu-miR-21a-5p	chr11:86584119-86584141_-	22	21	86584139	86584118	-	No	No	915	714	748	606	149.221	96.1787	82.6898	69.9787
chr11:86584118-86584140_-	mmu-miR-21a-5p	chr11:86584119-86584141_-	22	22	86584140	86584118	-	No	No	10919	9338	9432	7399	1780.7	1257.87	1042.69	854.41
chr11:86584118-86584142_-	mmu-miR-21a-5p	chr11:86584119-86584141_-	22	24	86584142	86584118	-	No	No	1202	1495	1206	1174	196.025	201.383	133.321	135.569
chr11:86584118-86584143_-	mmu-miR-21a-5p	chr11:86584119-86584141_-	22	25	86584143	86584118	-	No	No	17	25	14	31	2.7724	3.3676	1.54767	3.57977
chr11:86584118-86584144_-	mmu-miR-21a-5p	chr11:86584119-86584141_-	22	26	86584144	86584118	-	No	No	3	6	30	6	0.489248	0.808225	3.31644	0.692859
chr11:86584118-86584145_-	mmu-miR-21a-5p	chr11:86584119-86584141_-	22	27	86584145	86584118	-	No	No	8	3	7	4	1.30466	0.404112	0.773835	0.461906
chr11:86584119-86584137_-	mmu-miR-21a-5p	chr11:86584119-86584141_-	22	18	86584137	86584119	-	No	Yes	44	59	48	102	7.17563	7.94754	5.3063	11.7786
chr11:86584119-86584138_-	mmu-miR-21a-5p	chr11:86584119-86584141_-	22	19	86584138	86584119	-	No	Yes	12	6	25	30	1.95699	0.808225	2.7637	3.46429
chr11:86584119-86584139_-	mmu-miR-21a-5p	chr11:86584119-86584141_-	22	20	86584139	86584119	-	No	Yes	793	895	966	1111	129.324	120.56	106.789	128.294
chr11:86584119-86584140_-	mmu-miR-21a-5p	chr11:86584119-86584141_-	22	21	86584140	86584119	-	No	Yes	7496	8619	9921	9839	1222.47	1161.01	1096.75	1136.17
chr11:86584119-86584142_-	mmu-miR-21a-5p	chr11:86584119-86584141_-	22	23	86584142	86584119	-	No	Yes	4803	3838	5582	4661	783.286	516.994	617.078	538.236
chr11:86584119-86584143_-	mmu-miR-21a-5p	chr11:86584119-86584141_-	22	24	86584143	86584119	-	No	Yes	23	4	28	32	3.7509	0.538816	3.09534	3.69525
chr11:86584120-86584139_-	mmu-miR-21a-5p	chr11:86584119-86584141_-	22	19	86584139	86584120	-	No	No	61	99	94	149	9.94804	13.3357	10.3915	17.206
chr11:86584120-86584140_-	mmu-miR-21a-5p	chr11:86584119-86584141_-	22	20	86584140	86584120	-	No	No	801	1037	1303	1237	130.629	139.688	144.044	142.844
chr11:86584120-86584142_-	mmu-miR-21a-5p	chr11:86584119-86584141_-	22	22	86584142	86584120	-	No	No	2168	1966	3115	2076	353.563	264.828	344.357	239.729
chr11:86584120-86584144_-	mmu-miR-21a-5p	chr11:86584119-86584141_-	22	24	86584144	86584120	-	No	No	6	0	7	9	0.978496	0	0.773835	1.03929
chr11:86584121-86584140_-	mmu-miR-21a-5p	chr11:86584119-86584141_-	22	19	86584140	86584121	-	No	No	2	8	22	7	0.326165	1.07763	2.43205	0.808335
chr11:86584121-86584142_-	mmu-miR-21a-5p	chr11:86584119-86584141_-	22	21	86584142	86584121	-	No	No	79	88	161	104	12.8835	11.854	17.7982	12.0095
chr11:86584121-86584143_-	mmu-miR-21a-5p	chr11:86584119-86584141_-	22	22	86584143	86584121	-	No	No	1	0	13	3	0.163083	0	1.43712	0.346429
chr11:86584121-86584144_-	mmu-miR-21a-5p	chr11:86584119-86584141_-	22	23	86584144	86584121	-	No	No	5	19	14	26	0.815413	2.55938	1.54767	3.00239
chr11:86584122-86584140_-	mmu-miR-21a-5p	chr11:86584119-86584141_-	22	18	86584140	86584122	-	No	No	185	219	3	363	30.1703	29.5002	0.331644	41.9179
chr11:86584122-86584142_-	mmu-miR-21a-5p	chr11:86584119-86584141_-	22	20	86584142	86584122	-	No	No	192	317	13	284	31.3119	42.7012	1.43712	32.7953
chr11:86584122-86584144_-	mmu-miR-21a-5p	chr11:86584119-86584141_-	22	22	86584144	86584122	-	No	No	3	0	10	0	0.489248	0	1.10548	0
chr11:86584123-86584142_-	mmu-miR-21a-5p	chr11:86584119-86584141_-	22	19	86584142	86584123	-	No	No	153	159	1	181	24.9516	21.418	0.110548	20.9012
chr3:29636767-29636785_+	mmu-miR-21b	chr3:29636767-29636790_+	23	18	29636767	29636785	+	Yes	No	8	19	1	29	1.30466	2.55938	0.110548	3.34882
chr3:29636767-29636786_+	mmu-miR-21b	chr3:29636767-29636790_+	23	19	29636767	29636786	+	Yes	No	17	12	0	6	2.7724	1.61645	0	0.692859
chr8:128278190-128278208_-	mmu-miR-21c	chr8:128278187-128278208_-	21	18	128278208	128278190	-	Yes	No	16	20	1	16	2.60932	2.69408	0.110548	1.84762
chr11:75463768-75463793_+	mmu-miR-22-3p	chr11:75463771-75463793_+	22	25	75463768	75463793	+	No	Yes	5	2	16	16	0.815413	0.269408	1.76877	1.84762
chr11:75463770-75463792_+	mmu-miR-22-3p	chr11:75463771-75463793_+	22	22	75463770	75463792	+	No	No	9	4	24	21	1.46774	0.538816	2.65315	2.42501
chr11:75463770-75463793_+	mmu-miR-22-3p	chr11:75463771-75463793_+	22	23	75463770	75463793	+	No	Yes	92	107	89	124	15.0036	14.4133	9.83876	14.3191
chr11:75463771-75463790_+	mmu-miR-22-3p	chr11:75463771-75463793_+	22	19	75463771	75463790	+	Yes	No	436	843	137	1352	71.104	113.556	15.1451	156.124
chr11:75463771-75463791_+	mmu-miR-22-3p	chr11:75463771-75463793_+	22	20	75463771	75463791	+	Yes	No	1129	2755	1796	3307	184.12	371.11	198.544	381.881
chr11:75463771-75463792_+	mmu-miR-22-3p	chr11:75463771-75463793_+	22	21	75463771	75463792	+	Yes	No	10501	31621	10327	32546	1712.53	4259.48	1141.63	3758.3
chr11:75463771-75463793_+	mmu-miR-22-3p	chr11:75463771-75463793_+	22	22	75463771	75463793	+	Yes	Yes	123616	208924	153310	218550	20159.6	28142.9	16948.1	25237.4
chr11:75463771-75463794_+	mmu-miR-22-3p	chr11:75463771-75463793_+	22	23	75463771	75463794	+	Yes	No	1637	2484	2685	2594	266.966	334.605	296.821	299.546
chr11:75463771-75463795_+	mmu-miR-22-3p	chr11:75463771-75463793_+	22	24	75463771	75463795	+	Yes	No	35	71	111	96	5.70789	9.56399	12.2708	11.0857
chr11:75463771-75463796_+	mmu-miR-22-3p	chr11:75463771-75463793_+	22	25	75463771	75463796	+	Yes	No	3	8	16	9	0.489248	1.07763	1.76877	1.03929
chr11:75463772-75463790_+	mmu-miR-22-3p	chr11:75463771-75463793_+	22	18	75463772	75463790	+	No	No	3	20	0	27	0.489248	2.69408	0	3.11786
chr11:75463772-75463791_+	mmu-miR-22-3p	chr11:75463771-75463793_+	22	19	75463772	75463791	+	No	No	31	42	24	84	5.05556	5.65757	2.65315	9.70002
chr11:75463772-75463792_+	mmu-miR-22-3p	chr11:75463771-75463793_+	22	20	75463772	75463792	+	No	No	155	436	158	467	25.2778	58.731	17.4666	53.9275
chr11:75463772-75463793_+	mmu-miR-22-3p	chr11:75463771-75463793_+	22	21	75463772	75463793	+	No	Yes	1701	2642	1879	3363	277.403	355.888	207.719	388.347
chr11:75463772-75463794_+	mmu-miR-22-3p	chr11:75463771-75463793_+	22	22	75463772	75463794	+	No	No	20	69	49	57	3.26165	9.29458	5.41684	6.58216
chr11:75463772-75463795_+	mmu-miR-22-3p	chr11:75463771-75463793_+	22	23	75463772	75463795	+	No	No	6	7	0	8	0.978496	0.942929	0	0.923811
chr11:75463773-75463792_+	mmu-miR-22-3p	chr11:75463771-75463793_+	22	19	75463773	75463792	+	No	No	4	0	0	9	0.65233	0	0	1.03929
chr11:75463773-75463793_+	mmu-miR-22-3p	chr11:75463771-75463793_+	22	20	75463773	75463793	+	No	Yes	18	26	18	51	2.93549	3.50231	1.98986	5.8893
chr11:75463774-75463793_+	mmu-miR-22-3p	chr11:75463771-75463793_+	22	19	75463774	75463793	+	No	Yes	11	19	7	15	1.79391	2.55938	0.773835	1.73215
chr11:75463775-75463793_+	mmu-miR-22-3p	chr11:75463771-75463793_+	22	18	75463775	75463793	+	No	Yes	6	7	1	17	0.978496	0.942929	0.110548	1.9631
chr11:75463733-75463752_+	mmu-miR-22-5p	chr11:75463733-75463755_+	22	19	75463733	75463752	+	Yes	No	3	9	0	5	0.489248	1.21234	0	0.577382
chr11:75463733-75463753_+	mmu-miR-22-5p	chr11:75463733-75463755_+	22	20	75463733	75463753	+	Yes	No	2	16	0	24	0.326165	2.15527	0	2.77143
chr11:75463733-75463754_+	mmu-miR-22-5p	chr11:75463733-75463755_+	22	21	75463733	75463754	+	Yes	No	7	37	44	14	1.14158	4.98405	4.86411	1.61667
chr11:75463733-75463755_+	mmu-miR-22-5p	chr11:75463733-75463755_+	22	22	75463733	75463755	+	Yes	Yes	27	85	43	31	4.40323	11.4498	4.75356	3.57977
chr11:75463733-75463756_+	mmu-miR-22-5p	chr11:75463733-75463755_+	22	23	75463733	75463756	+	Yes	No	15	20	9	7	2.44624	2.69408	0.994931	0.808335
chrX:19146303-19146329_-	mmu-miR-221-3p	chrX:19146306-19146329_-	23	26	19146329	19146303	-	Yes	No	26	24	32	17	4.24015	3.2329	3.53753	1.9631
chrX:19146304-19146329_-	mmu-miR-221-3p	chrX:19146306-19146329_-	23	25	19146329	19146304	-	Yes	No	116	107	235	128	18.9176	14.4133	25.9787	14.781
chrX:19146305-19146328_-	mmu-miR-221-3p	chrX:19146306-19146329_-	23	23	19146328	19146305	-	No	No	41	49	95	57	6.68639	6.6005	10.502	6.58216
chrX:19146305-19146329_-	mmu-miR-221-3p	chrX:19146306-19146329_-	23	24	19146329	19146305	-	Yes	No	1991	1441	3309	1565	324.697	194.109	365.803	180.721
chrX:19146306-19146326_-	mmu-miR-221-3p	chrX:19146306-19146329_-	23	20	19146326	19146306	-	No	Yes	4	7	0	14	0.65233	0.942929	0	1.61667
chrX:19146306-19146328_-	mmu-miR-221-3p	chrX:19146306-19146329_-	23	22	19146328	19146306	-	No	Yes	206	203	368	151	33.595	27.3449	40.6816	17.4369
chrX:19146306-19146329_-	mmu-miR-221-3p	chrX:19146306-19146329_-	23	23	19146329	19146306	-	Yes	Yes	9959	7253	14897	5479	1624.14	977.009	1646.83	632.695
chrX:19146307-19146328_-	mmu-miR-221-3p	chrX:19146306-19146329_-	23	21	19146328	19146307	-	No	No	152	493	200	357	24.7886	66.4091	22.1096	41.2251
chrX:19146307-19146329_-	mmu-miR-221-3p	chrX:19146306-19146329_-	23	22	19146329	19146307	-	Yes	No	6878	20975	9719	10587	1121.68	2825.42	1074.41	1222.55
chrX:19146307-19146330_-	mmu-miR-221-3p	chrX:19146306-19146329_-	23	23	19146330	19146307	-	No	No	3	13	3	7	0.489248	1.75115	0.331644	0.808335
chrX:19146308-19146328_-	mmu-miR-221-3p	chrX:19146306-19146329_-	23	20	19146328	19146308	-	No	No	25	275	60	129	4.07706	37.0436	6.63287	14.8965
chrX:19146308-19146329_-	mmu-miR-221-3p	chrX:19146306-19146329_-	23	21	19146329	19146308	-	Yes	No	1301	8807	1934	4548	212.17	1186.34	213.8	525.187
chrX:19146309-19146328_-	mmu-miR-221-3p	chrX:19146306-19146329_-	23	19	19146328	19146309	-	No	No	12	30	13	37	1.95699	4.04112	1.43712	4.27263
chrX:19146309-19146329_-	mmu-miR-221-3p	chrX:19146306-19146329_-	23	20	19146329	19146309	-	Yes	No	417	1686	474	1165	68.0054	227.111	52.3997	134.53
chrX:19146310-19146329_-	mmu-miR-221-3p	chrX:19146306-19146329_-	23	19	19146329	19146310	-	Yes	No	89	291	119	211	14.5144	39.1989	13.1552	24.3655
chrX:19146311-19146329_-	mmu-miR-221-3p	chrX:19146306-19146329_-	23	18	19146329	19146311	-	Yes	No	27	40	52	88	4.40323	5.38816	5.74849	10.1619
chrX:19146340-19146369_-	mmu-miR-221-5p	chrX:19146343-19146369_-	26	29	19146369	19146340	-	Yes	No	10	5	5	3	1.63083	0.673521	0.552739	0.346429
chrX:19146341-19146362_-	mmu-miR-221-5p	chrX:19146343-19146369_-	26	21	19146362	19146341	-	No	No	4	9	3	7	0.65233	1.21234	0.331644	0.808335
chrX:19146341-19146363_-	mmu-miR-221-5p	chrX:19146343-19146369_-	26	22	19146363	19146341	-	No	No	24	29	40	24	3.91398	3.90642	4.42191	2.77143
chrX:19146341-19146369_-	mmu-miR-221-5p	chrX:19146343-19146369_-	26	28	19146369	19146341	-	Yes	No	47	16	75	32	7.66488	2.15527	8.29109	3.69525
chrX:19146342-19146362_-	mmu-miR-221-5p	chrX:19146343-19146369_-	26	20	19146362	19146342	-	No	No	1	11	4	0	0.163083	1.48175	0.442191	0
chrX:19146342-19146363_-	mmu-miR-221-5p	chrX:19146343-19146369_-	26	21	19146363	19146342	-	No	No	25	52	48	51	4.07706	7.00461	5.3063	5.8893
chrX:19146342-19146364_-	mmu-miR-221-5p	chrX:19146343-19146369_-	26	22	19146364	19146342	-	No	No	1	8	0	0	0.163083	1.07763	0	0
chrX:19146342-19146368_-	mmu-miR-221-5p	chrX:19146343-19146369_-	26	26	19146368	19146342	-	No	No	0	0	9	1	0	0	0.994931	0.115476
chrX:19146342-19146369_-	mmu-miR-221-5p	chrX:19146343-19146369_-	26	27	19146369	19146342	-	Yes	No	87	68	148	86	14.1882	9.15988	16.3611	9.93097
chrX:19146343-19146361_-	mmu-miR-221-5p	chrX:19146343-19146369_-	26	18	19146361	19146343	-	No	Yes	368	233	385	167	60.0144	31.3861	42.5609	19.2846
chrX:19146343-19146362_-	mmu-miR-221-5p	chrX:19146343-19146369_-	26	19	19146362	19146343	-	No	Yes	201	228	259	109	32.7796	30.7125	28.6319	12.5869
chrX:19146343-19146363_-	mmu-miR-221-5p	chrX:19146343-19146369_-	26	20	19146363	19146343	-	No	Yes	758	784	1049	476	123.617	105.608	115.965	54.9668
chrX:19146343-19146364_-	mmu-miR-221-5p	chrX:19146343-19146369_-	26	21	19146364	19146343	-	No	Yes	22	21	23	15	3.58782	2.82879	2.5426	1.73215
chrX:19146343-19146368_-	mmu-miR-221-5p	chrX:19146343-19146369_-	26	25	19146368	19146343	-	No	Yes	21	31	39	25	3.42473	4.17583	4.31137	2.88691
chrX:19146343-19146369_-	mmu-miR-221-5p	chrX:19146343-19146369_-	26	26	19146369	19146343	-	Yes	Yes	1191	859	1941	678	194.231	115.711	214.573	78.293
chrX:19146343-19146370_-	mmu-miR-221-5p	chrX:19146343-19146369_-	26	27	19146370	19146343	-	No	Yes	19	11	5	5	3.09857	1.48175	0.552739	0.577382
chrX:19146344-19146362_-	mmu-miR-221-5p	chrX:19146343-19146369_-	26	18	19146362	19146344	-	No	No	18	74	3	19	2.93549	9.9681	0.331644	2.19405
chrX:19146344-19146363_-	mmu-miR-221-5p	chrX:19146343-19146369_-	26	19	19146363	19146344	-	No	No	19	159	68	67	3.09857	21.418	7.51725	7.73692
chrX:19146344-19146369_-	mmu-miR-221-5p	chrX:19146343-19146369_-	26	25	19146369	19146344	-	Yes	No	82	193	113	110	13.3728	25.9979	12.4919	12.7024
chrX:19146345-19146363_-	mmu-miR-221-5p	chrX:19146343-19146369_-	26	18	19146363	19146345	-	No	No	53	220	156	128	8.64338	29.6349	17.2455	14.781
chrX:19146345-19146369_-	mmu-miR-221-5p	chrX:19146343-19146369_-	26	24	19146369	19146345	-	Yes	No	55	145	189	112	8.96954	19.5321	20.8935	12.9334
chrX:19146346-19146368_-	mmu-miR-221-5p	chrX:19146343-19146369_-	26	22	19146368	19146346	-	No	No	1	4	3	14	0.163083	0.538816	0.331644	1.61667
chrX:19146346-19146369_-	mmu-miR-221-5p	chrX:19146343-19146369_-	26	23	19146369	19146346	-	Yes	No	280	331	97	308	45.6631	44.5871	10.7231	35.5667
chrX:19146347-19146369_-	mmu-miR-221-5p	chrX:19146343-19146369_-	26	22	19146369	19146347	-	Yes	No	6	122	39	45	0.978496	16.4339	4.31137	5.19644
chrX:19146347-19146370_-	mmu-miR-221-5p	chrX:19146343-19146369_-	26	23	19146370	19146347	-	No	No	10	7	12	3	1.63083	0.942929	1.32657	0.346429
chrX:19146348-19146369_-	mmu-miR-221-5p	chrX:19146343-19146369_-	26	21	19146369	19146348	-	Yes	No	4	31	7	4	0.65233	4.17583	0.773835	0.461906
chrX:19146348-19146370_-	mmu-miR-221-5p	chrX:19146343-19146369_-	26	22	19146370	19146348	-	No	No	0	11	0	2	0	1.48175	0	0.230953
chrX:19146895-19146923_-	mmu-miR-222-3p	chrX:19146900-19146923_-	23	28	19146923	19146895	-	Yes	No	81	43	163	32	13.2097	5.79228	18.0193	3.69525
chrX:19146896-19146922_-	mmu-miR-222-3p	chrX:19146900-19146923_-	23	26	19146922	19146896	-	No	No	4	0	13	3	0.65233	0	1.43712	0.346429
chrX:19146896-19146923_-	mmu-miR-222-3p	chrX:19146900-19146923_-	23	27	19146923	19146896	-	Yes	No	163	79	244	48	26.5825	10.6416	26.9737	5.54287
chrX:19146897-19146921_-	mmu-miR-222-3p	chrX:19146900-19146923_-	23	24	19146921	19146897	-	No	No	28	11	24	7	4.56631	1.48175	2.65315	0.808335
chrX:19146897-19146922_-	mmu-miR-222-3p	chrX:19146900-19146923_-	23	25	19146922	19146897	-	No	No	19	23	5	11	3.09857	3.09819	0.552739	1.27024
chrX:19146897-19146923_-	mmu-miR-222-3p	chrX:19146900-19146923_-	23	26	19146923	19146897	-	Yes	No	372	327	339	163	60.6667	44.0482	37.4757	18.8227
chrX:19146898-19146920_-	mmu-miR-222-3p	chrX:19146900-19146923_-	23	22	19146920	19146898	-	No	No	14	3	11	6	2.28316	0.404112	1.21603	0.692859
chrX:19146898-19146921_-	mmu-miR-222-3p	chrX:19146900-19146923_-	23	23	19146921	19146898	-	No	No	73	55	39	37	11.905	7.40873	4.31137	4.27263
chrX:19146898-19146922_-	mmu-miR-222-3p	chrX:19146900-19146923_-	23	24	19146922	19146898	-	No	No	291	194	253	95	47.457	26.1326	27.9686	10.9703
chrX:19146898-19146923_-	mmu-miR-222-3p	chrX:19146900-19146923_-	23	25	19146923	19146898	-	Yes	No	8581	6349	8338	3053	1399.41	855.236	921.748	352.55
chrX:19146898-19146924_-	mmu-miR-222-3p	chrX:19146900-19146923_-	23	26	19146924	19146898	-	No	No	8	0	13	4	1.30466	0	1.43712	0.461906
chrX:19146899-19146919_-	mmu-miR-222-3p	chrX:19146900-19146923_-	23	20	19146919	19146899	-	No	No	4	8	14	12	0.65233	1.07763	1.54767	1.38572
chrX:19146899-19146920_-	mmu-miR-222-3p	chrX:19146900-19146923_-	23	21	19146920	19146899	-	No	No	16	29	61	11	2.60932	3.90642	6.74342	1.27024
chrX:19146899-19146921_-	mmu-miR-222-3p	chrX:19146900-19146923_-	23	22	19146921	19146899	-	No	No	37	76	76	20	6.03406	10.2375	8.40164	2.30953
chrX:19146899-19146922_-	mmu-miR-222-3p	chrX:19146900-19146923_-	23	23	19146922	19146899	-	No	No	1160	1223	1210	486	189.176	164.743	133.763	56.1215
chrX:19146899-19146923_-	mmu-miR-222-3p	chrX:19146900-19146923_-	23	24	19146923	19146899	-	Yes	No	45911	41301	43435	16928	7487.29	5563.41	4801.65	1954.79
chrX:19146899-19146924_-	mmu-miR-222-3p	chrX:19146900-19146923_-	23	25	19146924	19146899	-	No	No	19	13	14	5	3.09857	1.75115	1.54767	0.577382
chrX:19146900-19146921_-	mmu-miR-222-3p	chrX:19146900-19146923_-	23	21	19146921	19146900	-	No	Yes	0	20	0	1	0	2.69408	0	0.115476
chrX:19146900-19146922_-	mmu-miR-222-3p	chrX:19146900-19146923_-	23	22	19146922	19146900	-	No	Yes	36	119	28	45	5.87097	16.0298	3.09534	5.19644
chrX:19146900-19146923_-	mmu-miR-222-3p	chrX:19146900-19146923_-	23	23	19146923	19146900	-	Yes	Yes	1070	3211	1196	1308	174.498	432.535	132.215	151.043
chrX:19146901-19146922_-	mmu-miR-222-3p	chrX:19146900-19146923_-	23	21	19146922	19146901	-	No	No	14	44	9	29	2.28316	5.92698	0.994931	3.34882
chrX:19146901-19146923_-	mmu-miR-222-3p	chrX:19146900-19146923_-	23	22	19146923	19146901	-	Yes	No	413	2526	377	972	67.3531	340.263	41.6765	112.243
chrX:19146901-19146924_-	mmu-miR-222-3p	chrX:19146900-19146923_-	23	23	19146924	19146901	-	No	No	52	124	42	51	8.4803	16.7033	4.64301	5.8893
chrX:19146902-19146922_-	mmu-miR-222-3p	chrX:19146900-19146923_-	23	20	19146922	19146902	-	No	No	3	9	16	4	0.489248	1.21234	1.76877	0.461906
chrX:19146902-19146923_-	mmu-miR-222-3p	chrX:19146900-19146923_-	23	21	19146923	19146902	-	Yes	No	210	836	301	459	34.2473	112.613	33.2749	53.0037
chrX:19146902-19146924_-	mmu-miR-222-3p	chrX:19146900-19146923_-	23	22	19146924	19146902	-	No	No	14	61	61	27	2.28316	8.21695	6.74342	3.11786
chrX:19146902-19146925_-	mmu-miR-222-3p	chrX:19146900-19146923_-	23	23	19146925	19146902	-	No	No	8	10	5	20	1.30466	1.34704	0.552739	2.30953
chrX:19146903-19146923_-	mmu-miR-222-3p	chrX:19146900-19146923_-	23	20	19146923	19146903	-	Yes	No	49	90	48	123	7.99105	12.1234	5.3063	14.2036
chrX:19146903-19146924_-	mmu-miR-222-3p	chrX:19146900-19146923_-	23	21	19146924	19146903	-	No	No	4	5	5	21	0.65233	0.673521	0.552739	2.42501
chrX:19146904-19146922_-	mmu-miR-222-3p	chrX:19146900-19146923_-	23	18	19146922	19146904	-	No	No	11	7	5	2	1.79391	0.942929	0.552739	0.230953
chrX:19146904-19146923_-	mmu-miR-222-3p	chrX:19146900-19146923_-	23	19	19146923	19146904	-	Yes	No	172	308	221	199	28.0502	41.4889	24.4311	22.9798
chrX:19146904-19146924_-	mmu-miR-222-3p	chrX:19146900-19146923_-	23	20	19146924	19146904	-	No	No	7	18	32	20	1.14158	2.42467	3.53753	2.30953
chrX:19146904-19146925_-	mmu-miR-222-3p	chrX:19146900-19146923_-	23	21	19146925	19146904	-	No	No	0	10	10	5	0	1.34704	1.10548	0.577382
chrX:19146905-19146923_-	mmu-miR-222-3p	chrX:19146900-19146923_-	23	18	19146923	19146905	-	Yes	No	2	11	9	16	0.326165	1.48175	0.994931	1.84762
chrX:19146905-19146925_-	mmu-miR-222-3p	chrX:19146900-19146923_-	23	20	19146925	19146905	-	No	No	1	10	5	16	0.163083	1.34704	0.552739	1.84762
chrX:19146935-19146960_-	mmu-miR-222-5p	chrX:19146940-19146961_-	21	25	19146960	19146935	-	No	No	13	0	19	8	2.12007	0	2.10041	0.923811
chrX:19146936-19146960_-	mmu-miR-222-5p	chrX:19146940-19146961_-	21	24	19146960	19146936	-	No	No	6	0	10	2	0.978496	0	1.10548	0.230953
chrX:19146937-19146960_-	mmu-miR-222-5p	chrX:19146940-19146961_-	21	23	19146960	19146937	-	No	No	42	20	54	36	6.84947	2.69408	5.96958	4.15715
chrX:19146938-19146960_-	mmu-miR-222-5p	chrX:19146940-19146961_-	21	22	19146960	19146938	-	No	No	40	93	115	99	6.5233	12.5275	12.713	11.4322
chrX:19146939-19146960_-	mmu-miR-222-5p	chrX:19146940-19146961_-	21	21	19146960	19146939	-	No	No	58	89	118	103	9.45879	11.9887	13.0446	11.8941
chrX:19146939-19146961_-	mmu-miR-222-5p	chrX:19146940-19146961_-	21	22	19146961	19146939	-	Yes	No	90	24	113	45	14.6774	3.2329	12.4919	5.19644
chrX:19146940-19146959_-	mmu-miR-222-5p	chrX:19146940-19146961_-	21	19	19146959	19146940	-	No	Yes	0	0	13	0	0	0	1.43712	0
chrX:19146940-19146960_-	mmu-miR-222-5p	chrX:19146940-19146961_-	21	20	19146960	19146940	-	No	Yes	46	18	58	22	7.5018	2.42467	6.41178	2.54048
chrX:19146940-19146961_-	mmu-miR-222-5p	chrX:19146940-19146961_-	21	21	19146961	19146940	-	Yes	Yes	103	62	196	24	16.7975	8.35165	21.6674	2.77143
chrX:19146941-19146960_-	mmu-miR-222-5p	chrX:19146940-19146961_-	21	19	19146960	19146941	-	No	No	2	20	23	16	0.326165	2.69408	2.5426	1.84762
chrX:19146941-19146961_-	mmu-miR-222-5p	chrX:19146940-19146961_-	21	20	19146961	19146941	-	Yes	No	40	26	35	22	6.5233	3.50231	3.86917	2.54048
chrX:96242881-96242903_+	mmu-miR-223-3p	chrX:96242883-96242905_+	22	22	96242881	96242903	+	No	No	5	0	10	0	0.815413	0	1.10548	0
chrX:96242881-96242904_+	mmu-miR-223-3p	chrX:96242883-96242905_+	22	23	96242881	96242904	+	No	No	0	6	11	0	0	0.808225	1.21603	0
chrX:96242882-96242901_+	mmu-miR-223-3p	chrX:96242883-96242905_+	22	19	96242882	96242901	+	No	No	19	16	7	6	3.09857	2.15527	0.773835	0.692859
chrX:96242882-96242902_+	mmu-miR-223-3p	chrX:96242883-96242905_+	22	20	96242882	96242902	+	No	No	6	10	21	9	0.978496	1.34704	2.3215	1.03929
chrX:96242882-96242903_+	mmu-miR-223-3p	chrX:96242883-96242905_+	22	21	96242882	96242903	+	No	No	56	24	54	7	9.13263	3.2329	5.96958	0.808335
chrX:96242882-96242904_+	mmu-miR-223-3p	chrX:96242883-96242905_+	22	22	96242882	96242904	+	No	No	33	20	61	0	5.38173	2.69408	6.74342	0
chrX:96242882-96242905_+	mmu-miR-223-3p	chrX:96242883-96242905_+	22	23	96242882	96242905	+	No	Yes	10	10	24	9	1.63083	1.34704	2.65315	1.03929
chrX:96242882-96242906_+	mmu-miR-223-3p	chrX:96242883-96242905_+	22	24	96242882	96242906	+	No	No	0	5	10	0	0	0.673521	1.10548	0
chrX:96242883-96242901_+	mmu-miR-223-3p	chrX:96242883-96242905_+	22	18	96242883	96242901	+	Yes	No	553	1041	689	788	90.1847	140.227	76.1675	90.9954
chrX:96242883-96242902_+	mmu-miR-223-3p	chrX:96242883-96242905_+	22	19	96242883	96242902	+	Yes	No	3752	3717	4150	2098	611.886	500.695	458.774	242.27
chrX:96242883-96242903_+	mmu-miR-223-3p	chrX:96242883-96242905_+	22	20	96242883	96242903	+	Yes	No	7186	3315	7234	2098	1171.91	446.544	799.703	242.27
chrX:96242883-96242904_+	mmu-miR-223-3p	chrX:96242883-96242905_+	22	21	96242883	96242904	+	Yes	No	5480	1444	4923	898	893.693	194.513	544.227	103.698
chrX:96242883-96242905_+	mmu-miR-223-3p	chrX:96242883-96242905_+	22	22	96242883	96242905	+	Yes	Yes	4724	2890	3817	1185	770.402	389.295	421.961	136.84
chrX:96242883-96242906_+	mmu-miR-223-3p	chrX:96242883-96242905_+	22	23	96242883	96242906	+	Yes	No	2236	1952	2061	866	364.653	262.942	227.839	100.003
chrX:96242883-96242907_+	mmu-miR-223-3p	chrX:96242883-96242905_+	22	24	96242883	96242907	+	Yes	No	1468	1424	1463	472	239.405	191.819	161.732	54.5049
chrX:96242883-96242908_+	mmu-miR-223-3p	chrX:96242883-96242905_+	22	25	96242883	96242908	+	Yes	No	151	154	177	46	24.6255	20.7444	19.567	5.31192
chrX:96242883-96242909_+	mmu-miR-223-3p	chrX:96242883-96242905_+	22	26	96242883	96242909	+	Yes	No	7	8	3	6	1.14158	1.07763	0.331644	0.692859
chrX:96242884-96242902_+	mmu-miR-223-3p	chrX:96242883-96242905_+	22	18	96242884	96242902	+	No	No	20	18	30	16	3.26165	2.42467	3.31644	1.84762
chrX:96242884-96242903_+	mmu-miR-223-3p	chrX:96242883-96242905_+	22	19	96242884	96242903	+	No	No	92	54	91	30	15.0036	7.27402	10.0599	3.46429
chrX:96242884-96242904_+	mmu-miR-223-3p	chrX:96242883-96242905_+	22	20	96242884	96242904	+	No	No	113	30	99	45	18.4283	4.04112	10.9442	5.19644
chrX:96242884-96242905_+	mmu-miR-223-3p	chrX:96242883-96242905_+	22	21	96242884	96242905	+	No	Yes	164	138	116	74	26.7455	18.5892	12.8236	8.54526
chrX:96242884-96242906_+	mmu-miR-223-3p	chrX:96242883-96242905_+	22	22	96242884	96242906	+	No	No	180	112	136	44	29.3549	15.0869	15.0345	5.08096
chrX:96242884-96242907_+	mmu-miR-223-3p	chrX:96242883-96242905_+	22	23	96242884	96242907	+	No	No	114	78	163	49	18.5914	10.5069	18.0193	5.65835
chrX:96242884-96242908_+	mmu-miR-223-3p	chrX:96242883-96242905_+	22	24	96242884	96242908	+	No	No	25	12	22	0	4.07706	1.61645	2.43205	0
chrX:96242840-96242862_+	mmu-miR-223-5p	chrX:96242841-96242864_+	23	22	96242840	96242862	+	No	No	12	6	15	7	1.95699	0.808225	1.65822	0.808335
chrX:96242840-96242863_+	mmu-miR-223-5p	chrX:96242841-96242864_+	23	23	96242840	96242863	+	No	No	9	3	10	0	1.46774	0.404112	1.10548	0
chrX:96242840-96242867_+	mmu-miR-223-5p	chrX:96242841-96242864_+	23	27	96242840	96242867	+	No	No	12	0	19	4	1.95699	0	2.10041	0.461906
chrX:96242840-96242868_+	mmu-miR-223-5p	chrX:96242841-96242864_+	23	28	96242840	96242868	+	No	No	25	11	90	7	4.07706	1.48175	9.94931	0.808335
chrX:96242840-96242869_+	mmu-miR-223-5p	chrX:96242841-96242864_+	23	29	96242840	96242869	+	No	No	8	1	28	0	1.30466	0.134704	3.09534	0
chrX:96242840-96242870_+	mmu-miR-223-5p	chrX:96242841-96242864_+	23	30	96242840	96242870	+	No	No	20	1	27	1	3.26165	0.134704	2.98479	0.115476
chrX:96242841-96242861_+	mmu-miR-223-5p	chrX:96242841-96242864_+	23	20	96242841	96242861	+	Yes	No	0	9	0	0	0	1.21234	0	0
chrX:96242841-96242862_+	mmu-miR-223-5p	chrX:96242841-96242864_+	23	21	96242841	96242862	+	Yes	No	85	76	31	16	13.862	10.2375	3.42698	1.84762
chrX:96242841-96242863_+	mmu-miR-223-5p	chrX:96242841-96242864_+	23	22	96242841	96242863	+	Yes	No	23	73	14	33	3.7509	9.8334	1.54767	3.81072
chrX:96242841-96242864_+	mmu-miR-223-5p	chrX:96242841-96242864_+	23	23	96242841	96242864	+	Yes	Yes	113	124	80	81	18.4283	16.7033	8.84383	9.35359
chrX:96242841-96242865_+	mmu-miR-223-5p	chrX:96242841-96242864_+	23	24	96242841	96242865	+	Yes	No	288	242	344	59	46.9678	32.5984	38.0285	6.81311
chrX:96242841-96242866_+	mmu-miR-223-5p	chrX:96242841-96242864_+	23	25	96242841	96242866	+	Yes	No	176	94	215	52	28.7025	12.6622	23.7678	6.00477
chrX:96242841-96242867_+	mmu-miR-223-5p	chrX:96242841-96242864_+	23	26	96242841	96242867	+	Yes	No	436	216	573	95	71.104	29.0961	63.3439	10.9703
chrX:96242841-96242868_+	mmu-miR-223-5p	chrX:96242841-96242864_+	23	27	96242841	96242868	+	Yes	No	1200	401	1564	243	195.699	54.0163	172.897	28.0608
chrX:96242841-96242869_+	mmu-miR-223-5p	chrX:96242841-96242864_+	23	28	96242841	96242869	+	Yes	No	636	22	915	23	103.721	2.96349	101.151	2.65596
chrX:96242841-96242870_+	mmu-miR-223-5p	chrX:96242841-96242864_+	23	29	96242841	96242870	+	Yes	No	1135	159	1893	137	185.099	21.418	209.267	15.8203
chrX:96242841-96242871_+	mmu-miR-223-5p	chrX:96242841-96242864_+	23	30	96242841	96242871	+	Yes	No	11	0	21	0	1.79391	0	2.3215	0
[truncated: 2,285 more rows]

## Sheet: BMDCs - Table S2
Row.names	mir_name	mature_iv	mature_length	length	isomir_start	isomir_end	isomir_strand	canon_start	canon_end	Wt_raw	Wt+LPS_raw	miR-155_KO_raw	miR-155_KO+LPS_raw	Wt_norm	Wt+LPS_norm	miR-155_KO_norm	miR-155_KO+LPS_norm
chr13:48538186-48538209_-	mmu-let-7a-1-3p	chr13:48538187-48538209_-	22	23	48538209	48538186	-	Yes	No	7	0	13	3	0.88563	0	1.38339	0.281406
chr13:48538187-48538208_-	mmu-let-7a-1-3p	chr13:48538187-48538209_-	22	21	48538208	48538187	-	No	Yes	10	6	9	8	1.26519	0.695411	0.957733	0.750417
chr13:48538187-48538209_-	mmu-let-7a-1-3p	chr13:48538187-48538209_-	22	22	48538209	48538187	-	Yes	Yes	302	203	453	242	38.2086	23.5281	48.2059	22.7001
chr13:48538188-48538209_-	mmu-let-7a-1-3p	chr13:48538187-48538209_-	22	21	48538209	48538188	-	Yes	No	21	30	45	33	2.65689	3.47705	4.78866	3.09547
chr13:48538189-48538209_-	mmu-let-7a-1-3p	chr13:48538187-48538209_-	22	20	48538209	48538189	-	Yes	No	14	24	12	10	1.77126	2.78164	1.27698	0.938021
chr9:41536730-41536752_+	mmu-let-7a-5p	chr9:41536731-41536753_+	22	22	41536730	41536752	+	No	No	14	22	18	28	1.77126	2.54984	1.91547	2.62646
chr9:41536730-41536753_+	mmu-let-7a-5p	chr9:41536731-41536753_+	22	23	41536730	41536753	+	No	Yes	69	110	121	118	8.72978	12.7492	12.8762	11.0686
chr9:41536730-41536754_+	mmu-let-7a-5p	chr9:41536731-41536753_+	22	24	41536730	41536754	+	No	No	6	12	27	26	0.759111	1.39082	2.8732	2.43885
chr9:41536731-41536749_+	mmu-let-7a-5p	chr9:41536731-41536753_+	22	18	41536731	41536749	+	Yes	No	16	67	68	134	2.0243	7.76542	7.2362	12.5695
chr9:41536731-41536750_+	mmu-let-7a-5p	chr9:41536731-41536753_+	22	19	41536731	41536750	+	Yes	No	73	255	179	413	9.23585	29.555	19.0482	38.7403
chr9:41536731-41536751_+	mmu-let-7a-5p	chr9:41536731-41536753_+	22	20	41536731	41536751	+	Yes	No	1196	4149	2770	6094	151.316	480.877	294.769	571.63
chr9:41536731-41536752_+	mmu-let-7a-5p	chr9:41536731-41536753_+	22	21	41536731	41536752	+	Yes	No	20432	39771	39157	50663	2585.03	4609.53	4166.88	4752.3
chr9:41536731-41536753_+	mmu-let-7a-5p	chr9:41536731-41536753_+	22	22	41536731	41536753	+	Yes	Yes	134992	197912	227394	221418	17079	22938.4	24198.1	20769.5
chr9:41536731-41536754_+	mmu-let-7a-5p	chr9:41536731-41536753_+	22	23	41536731	41536754	+	Yes	No	13941	31295	29061	34854	1763.79	3627.15	3092.52	3269.38
chr9:41536731-41536755_+	mmu-let-7a-5p	chr9:41536731-41536753_+	22	24	41536731	41536755	+	Yes	No	1249	2797	2387	2816	158.022	324.177	254.012	264.147
chr9:41536731-41536756_+	mmu-let-7a-5p	chr9:41536731-41536753_+	22	25	41536731	41536756	+	Yes	No	191	413	369	479	24.165	47.8674	39.267	44.9312
chr9:41536731-41536757_+	mmu-let-7a-5p	chr9:41536731-41536753_+	22	26	41536731	41536757	+	Yes	No	45	154	104	181	5.69333	17.8489	11.0671	16.9782
chr9:41536731-41536758_+	mmu-let-7a-5p	chr9:41536731-41536753_+	22	27	41536731	41536758	+	Yes	No	3	19	8	7	0.379556	2.20213	0.851318	0.656615
chr9:41536731-41536759_+	mmu-let-7a-5p	chr9:41536731-41536753_+	22	28	41536731	41536759	+	Yes	No	1	11	12	16	0.126519	1.27492	1.27698	1.50083
chr9:41536732-41536751_+	mmu-let-7a-5p	chr9:41536731-41536753_+	22	19	41536732	41536751	+	No	No	13	40	32	62	1.64474	4.63607	3.40527	5.81573
chr9:41536732-41536752_+	mmu-let-7a-5p	chr9:41536731-41536753_+	22	20	41536732	41536752	+	No	No	207	420	345	600	26.1893	48.6788	36.7131	56.2813
chr9:41536732-41536753_+	mmu-let-7a-5p	chr9:41536731-41536753_+	22	21	41536732	41536753	+	No	Yes	1567	2485	2571	2765	198.255	288.016	273.592	259.363
chr9:41536732-41536754_+	mmu-let-7a-5p	chr9:41536731-41536753_+	22	22	41536732	41536754	+	No	No	216	469	431	502	27.328	54.3579	45.8648	47.0886
chr9:41536732-41536755_+	mmu-let-7a-5p	chr9:41536731-41536753_+	22	23	41536732	41536755	+	No	No	12	50	36	35	1.51822	5.79509	3.83093	3.28307
chr9:41536733-41536753_+	mmu-let-7a-5p	chr9:41536731-41536753_+	22	20	41536733	41536753	+	No	Yes	4	6	14	8	0.506074	0.695411	1.48981	0.750417
chr9:41536734-41536752_+	mmu-let-7a-5p	chr9:41536731-41536753_+	22	18	41536734	41536752	+	No	No	3	10	2	4	0.379556	1.15902	0.21283	0.375208
chr9:41536734-41536753_+	mmu-let-7a-5p	chr9:41536731-41536753_+	22	19	41536734	41536753	+	No	Yes	5	65	40	41	0.632593	7.53362	4.25659	3.84589
chr9:41536735-41536753_+	mmu-let-7a-5p	chr9:41536731-41536753_+	22	18	41536735	41536753	+	No	Yes	2	23	12	19	0.253037	2.66574	1.27698	1.78224
chr9:41536736-41536754_+	mmu-let-7a-5p	chr9:41536731-41536753_+	22	18	41536736	41536754	+	No	No	0	18	7	4	0	2.08623	0.744903	0.375208
chr15:85707378-85707398_+	mmu-let-7b-3p	chr15:85707378-85707400_+	22	20	85707378	85707398	+	Yes	No	12	4	2	0	1.51822	0.463607	0.21283	0
chr15:85707378-85707399_+	mmu-let-7b-3p	chr15:85707378-85707400_+	22	21	85707378	85707399	+	Yes	No	21	23	24	27	2.65689	2.66574	2.55395	2.53266
chr15:85707378-85707400_+	mmu-let-7b-3p	chr15:85707378-85707400_+	22	22	85707378	85707400	+	Yes	Yes	158	55	183	31	19.9899	6.3746	19.4739	2.90786
chr15:85707379-85707400_+	mmu-let-7b-3p	chr15:85707378-85707400_+	22	21	85707379	85707400	+	No	Yes	0	0	16	0	0	0	1.70264	0
chr15:85707324-85707342_+	mmu-let-7b-5p	chr15:85707324-85707346_+	22	18	85707324	85707342	+	Yes	No	37	73	52	71	4.68119	8.46083	5.53357	6.65995
chr15:85707324-85707343_+	mmu-let-7b-5p	chr15:85707324-85707346_+	22	19	85707324	85707343	+	Yes	No	106	230	174	358	13.411	26.6574	18.5162	33.5811
chr15:85707324-85707344_+	mmu-let-7b-5p	chr15:85707324-85707346_+	22	20	85707324	85707344	+	Yes	No	870	1886	1421	1789	110.071	218.591	151.215	167.812
chr15:85707324-85707345_+	mmu-let-7b-5p	chr15:85707324-85707346_+	22	21	85707324	85707345	+	Yes	No	3340	6710	5153	5933	422.572	777.701	548.355	556.528
chr15:85707324-85707346_+	mmu-let-7b-5p	chr15:85707324-85707346_+	22	22	85707324	85707346	+	Yes	Yes	19096	25056	27211	20496	2416	2904.04	2895.65	1922.57
chr15:85707324-85707347_+	mmu-let-7b-5p	chr15:85707324-85707346_+	22	23	85707324	85707347	+	Yes	No	9280	19653	16757	17745	1174.09	2277.82	1783.19	1664.52
chr15:85707324-85707348_+	mmu-let-7b-5p	chr15:85707324-85707346_+	22	24	85707324	85707348	+	Yes	No	1713	3748	3059	3360	216.726	434.4	325.523	315.175
chr15:85707324-85707349_+	mmu-let-7b-5p	chr15:85707324-85707346_+	22	25	85707324	85707349	+	Yes	No	270	559	584	546	34.16	64.7891	62.1462	51.2159
chr15:85707324-85707350_+	mmu-let-7b-5p	chr15:85707324-85707346_+	22	26	85707324	85707350	+	Yes	No	23	55	56	71	2.90993	6.3746	5.95923	6.65995
chr15:85707325-85707344_+	mmu-let-7b-5p	chr15:85707324-85707346_+	22	19	85707325	85707344	+	No	No	9	11	5	12	1.13867	1.27492	0.532074	1.12563
chr15:85707325-85707345_+	mmu-let-7b-5p	chr15:85707324-85707346_+	22	20	85707325	85707345	+	No	No	24	44	32	27	3.03644	5.09968	3.40527	2.53266
chr15:85707325-85707346_+	mmu-let-7b-5p	chr15:85707324-85707346_+	22	21	85707325	85707346	+	No	Yes	177	222	214	188	22.3938	25.7302	22.7728	17.6348
chr15:85707325-85707347_+	mmu-let-7b-5p	chr15:85707324-85707346_+	22	22	85707325	85707347	+	No	No	86	139	173	177	10.8806	16.1104	18.4098	16.603
chr15:85707325-85707348_+	mmu-let-7b-5p	chr15:85707324-85707346_+	22	23	85707325	85707348	+	No	No	25	30	15	19	3.16296	3.47705	1.59622	1.78224
chr15:85707325-85707349_+	mmu-let-7b-5p	chr15:85707324-85707346_+	22	24	85707325	85707349	+	No	No	1	7	11	4	0.126519	0.811313	1.17056	0.375208
chr15:85707326-85707347_+	mmu-let-7b-5p	chr15:85707324-85707346_+	22	21	85707326	85707347	+	No	No	0	10	0	1	0	1.15902	0	0.0938021
chr15:85707327-85707346_+	mmu-let-7b-5p	chr15:85707324-85707346_+	22	19	85707327	85707346	+	No	Yes	1	16	12	10	0.126519	1.85443	1.27698	0.938021
chr15:85707327-85707347_+	mmu-let-7b-5p	chr15:85707324-85707346_+	22	20	85707327	85707347	+	No	No	0	5	6	16	0	0.579509	0.638489	1.50083
chr15:85707328-85707346_+	mmu-let-7b-5p	chr15:85707324-85707346_+	22	18	85707328	85707346	+	No	Yes	1	13	11	13	0.126519	1.50672	1.17056	1.21943
chr15:85707328-85707347_+	mmu-let-7b-5p	chr15:85707324-85707346_+	22	19	85707328	85707347	+	No	No	0	10	6	3	0	1.15902	0.638489	0.281406
chr15:85707329-85707347_+	mmu-let-7b-5p	chr15:85707324-85707346_+	22	18	85707329	85707347	+	No	No	0	33	11	10	0	3.82476	1.17056	0.938021
chr16:77599716-77599736_+	mmu-let-7c-1-3p	chr16:77599716-77599738_+	22	20	77599716	77599736	+	Yes	No	11	0	2	6	1.3917	0	0.21283	0.562813
chr16:77599716-77599737_+	mmu-let-7c-1-3p	chr16:77599716-77599738_+	22	21	77599716	77599737	+	Yes	No	31	3	43	16	3.92207	0.347705	4.57583	1.50083
chr16:77599716-77599738_+	mmu-let-7c-1-3p	chr16:77599716-77599738_+	22	22	77599716	77599738	+	Yes	Yes	467	48	378	57	59.0842	5.56329	40.2248	5.34672
chr16:77599716-77599739_+	mmu-let-7c-1-3p	chr16:77599716-77599738_+	22	23	77599716	77599739	+	Yes	No	41	0	28	4	5.18726	0	2.97961	0.375208
chr16:77599717-77599738_+	mmu-let-7c-1-3p	chr16:77599716-77599738_+	22	21	77599717	77599738	+	No	Yes	13	0	13	2	1.64474	0	1.38339	0.187604
chr16:77599717-77599739_+	mmu-let-7c-1-3p	chr16:77599716-77599738_+	22	22	77599717	77599739	+	No	No	8	5	16	3	1.01215	0.579509	1.70264	0.281406
chr15:85706663-85706683_+	mmu-let-7c-2-3p	chr15:85706663-85706685_+	22	20	85706663	85706683	+	Yes	No	14	19	10	11	1.77126	2.20213	1.06415	1.03182
chr15:85706663-85706684_+	mmu-let-7c-2-3p	chr15:85706663-85706685_+	22	21	85706663	85706684	+	Yes	No	28	43	55	38	3.54252	4.98378	5.85281	3.56448
chr15:85706663-85706685_+	mmu-let-7c-2-3p	chr15:85706663-85706685_+	22	22	85706663	85706685	+	Yes	Yes	281	194	432	222	35.5517	22.4849	45.9712	20.8241
chr15:85706663-85706686_+	mmu-let-7c-2-3p	chr15:85706663-85706685_+	22	23	85706663	85706686	+	Yes	No	4	0	16	6	0.506074	0	1.70264	0.562813
chr15:85706664-85706685_+	mmu-let-7c-2-3p	chr15:85706663-85706685_+	22	21	85706664	85706685	+	No	Yes	6	8	11	11	0.759111	0.927214	1.17056	1.03182
chr15:85706613-85706636_+	mmu-let-7c-5p	chr15:85706615-85706637_+	22	23	85706613	85706636	+	No	No	1	9	10	10	0.126519	1.04312	1.06415	0.938021
chr15:85706613-85706637_+	mmu-let-7c-5p	chr15:85706615-85706637_+	22	24	85706613	85706637	+	No	Yes	4	15	8	12	0.506074	1.73853	0.851318	1.12563
chr15:85706614-85706637_+	mmu-let-7c-5p	chr15:85706615-85706637_+	22	23	85706614	85706637	+	No	Yes	24	47	38	38	3.03644	5.44738	4.04376	3.56448
chr15:85706614-85706638_+	mmu-let-7c-5p	chr15:85706615-85706637_+	22	24	85706614	85706638	+	No	No	1	6	9	12	0.126519	0.695411	0.957733	1.12563
chr15:85706614-85706639_+	mmu-let-7c-5p	chr15:85706615-85706637_+	22	25	85706614	85706639	+	No	No	0	7	12	14	0	0.811313	1.27698	1.31323
chr15:85706615-85706633_+	mmu-let-7c-5p	chr15:85706615-85706637_+	22	18	85706615	85706633	+	Yes	No	31	65	76	127	3.92207	7.53362	8.08752	11.9129
chr15:85706615-85706634_+	mmu-let-7c-5p	chr15:85706615-85706637_+	22	19	85706615	85706634	+	Yes	No	117	233	210	482	14.8027	27.0051	22.3471	45.2126
chr15:85706615-85706635_+	mmu-let-7c-5p	chr15:85706615-85706637_+	22	20	85706615	85706635	+	Yes	No	692	1618	1629	2172	87.5508	187.529	173.35	203.738
chr15:85706615-85706636_+	mmu-let-7c-5p	chr15:85706615-85706637_+	22	21	85706615	85706636	+	Yes	No	7756	16578	16015	21406	981.278	1921.42	1704.23	2007.93
chr15:85706615-85706637_+	mmu-let-7c-5p	chr15:85706615-85706637_+	22	22	85706615	85706637	+	Yes	Yes	84201	114133	147118	129037	10653	13228.2	15655.5	12103.9
chr15:85706615-85706638_+	mmu-let-7c-5p	chr15:85706615-85706637_+	22	23	85706615	85706638	+	Yes	No	9823	22588	22864	27616	1242.79	2617.99	2433.07	2590.44
chr15:85706615-85706639_+	mmu-let-7c-5p	chr15:85706615-85706637_+	22	24	85706615	85706639	+	Yes	No	2717	7385	6057	8301	343.751	855.935	644.554	778.651
chr15:85706615-85706640_+	mmu-let-7c-5p	chr15:85706615-85706637_+	22	25	85706615	85706640	+	Yes	No	89	328	235	380	11.2601	38.0158	25.0075	35.6448
chr15:85706615-85706641_+	mmu-let-7c-5p	chr15:85706615-85706637_+	22	26	85706615	85706641	+	Yes	No	0	3	7	22	0	0.347705	0.744903	2.06365
chr15:85706616-85706635_+	mmu-let-7c-5p	chr15:85706615-85706637_+	22	19	85706616	85706635	+	No	No	1	22	4	17	0.126519	2.54984	0.425659	1.59464
chr15:85706616-85706636_+	mmu-let-7c-5p	chr15:85706615-85706637_+	22	20	85706616	85706636	+	No	No	80	172	203	241	10.1215	19.9351	21.6022	22.6063
chr15:85706616-85706637_+	mmu-let-7c-5p	chr15:85706615-85706637_+	22	21	85706616	85706637	+	No	Yes	933	1354	1504	1443	118.042	156.931	160.048	135.356
chr15:85706616-85706638_+	mmu-let-7c-5p	chr15:85706615-85706637_+	22	22	85706616	85706638	+	No	No	89	280	217	304	11.2601	32.4525	23.092	28.5158
chr15:85706616-85706639_+	mmu-let-7c-5p	chr15:85706615-85706637_+	22	23	85706616	85706639	+	No	No	28	54	44	100	3.54252	6.2587	4.68225	9.38021
chr15:85706617-85706637_+	mmu-let-7c-5p	chr15:85706615-85706637_+	22	20	85706617	85706637	+	No	Yes	6	14	16	14	0.759111	1.62263	1.70264	1.31323
chr15:85706618-85706637_+	mmu-let-7c-5p	chr15:85706615-85706637_+	22	19	85706618	85706637	+	No	Yes	8	48	26	40	1.01215	5.56329	2.76678	3.75208
chr15:85706618-85706638_+	mmu-let-7c-5p	chr15:85706615-85706637_+	22	20	85706618	85706638	+	No	No	1	8	9	12	0.126519	0.927214	0.957733	1.12563
chr15:85706619-85706637_+	mmu-let-7c-5p	chr15:85706615-85706637_+	22	18	85706619	85706637	+	No	Yes	11	33	32	28	1.3917	3.82476	3.40527	2.62646
chr15:85706619-85706638_+	mmu-let-7c-5p	chr15:85706615-85706637_+	22	19	85706619	85706638	+	No	No	0	12	6	8	0	1.39082	0.638489	0.750417
chr15:85706620-85706638_+	mmu-let-7c-5p	chr15:85706615-85706637_+	22	18	85706620	85706638	+	No	No	1	13	3	5	0.126519	1.50672	0.319244	0.46901
chr13:48536021-48536044_-	mmu-let-7d-3p	chr13:48536023-48536045_-	22	23	48536044	48536021	-	No	No	12	1	10	3	1.51822	0.115902	1.06415	0.281406
chr13:48536021-48536045_-	mmu-let-7d-3p	chr13:48536023-48536045_-	22	24	48536045	48536021	-	Yes	No	10	9	16	11	1.26519	1.04312	1.70264	1.03182
chr13:48536022-48536044_-	mmu-let-7d-3p	chr13:48536023-48536045_-	22	22	48536044	48536022	-	No	No	15	12	43	25	1.89778	1.39082	4.57583	2.34505
chr13:48536022-48536045_-	mmu-let-7d-3p	chr13:48536023-48536045_-	22	23	48536045	48536022	-	Yes	No	61	50	98	102	7.71763	5.79509	10.4286	9.56781
chr13:48536023-48536043_-	mmu-let-7d-3p	chr13:48536023-48536045_-	22	20	48536043	48536023	-	No	Yes	5	2	17	8	0.632593	0.231804	1.80905	0.750417
chr13:48536023-48536044_-	mmu-let-7d-3p	chr13:48536023-48536045_-	22	21	48536044	48536023	-	No	Yes	431	496	1001	767	54.5295	57.4873	106.521	71.9462
chr13:48536023-48536045_-	mmu-let-7d-3p	chr13:48536023-48536045_-	22	22	48536045	48536023	-	Yes	Yes	5535	4636	14203	11271	700.28	537.321	1511.41	1057.24
chr13:48536024-48536044_-	mmu-let-7d-3p	chr13:48536023-48536045_-	22	20	48536044	48536024	-	No	No	29	54	31	110	3.66904	6.2587	3.29886	10.3182
chr13:48536024-48536045_-	mmu-let-7d-3p	chr13:48536023-48536045_-	22	21	48536045	48536024	-	Yes	No	434	919	788	1503	54.909	106.514	83.8548	140.985
chr13:48536025-48536044_-	mmu-let-7d-3p	chr13:48536023-48536045_-	22	19	48536044	48536025	-	No	No	3	7	2	28	0.379556	0.811313	0.21283	2.62646
chr13:48536025-48536045_-	mmu-let-7d-3p	chr13:48536023-48536045_-	22	20	48536045	48536025	-	Yes	No	68	402	49	484	8.60326	46.5925	5.21432	45.4002
chr13:48536026-48536045_-	mmu-let-7d-3p	chr13:48536023-48536045_-	22	19	48536045	48536026	-	Yes	No	4	76	8	106	0.506074	8.80854	0.851318	9.94302
chr13:48536027-48536045_-	mmu-let-7d-3p	chr13:48536023-48536045_-	22	18	48536045	48536027	-	Yes	No	1	80	10	128	0.126519	9.27214	1.06415	12.0067
chr13:48536073-48536099_-	mmu-let-7d-5p	chr13:48536077-48536099_-	22	26	48536099	48536073	-	Yes	No	2	8	16	19	0.253037	0.927214	1.70264	1.78224
chr13:48536074-48536099_-	mmu-let-7d-5p	chr13:48536077-48536099_-	22	25	48536099	48536074	-	Yes	No	33	127	95	136	4.17511	14.7195	10.1094	12.7571
chr13:48536075-48536098_-	mmu-let-7d-5p	chr13:48536077-48536099_-	22	23	48536098	48536075	-	No	No	5	11	5	11	0.632593	1.27492	0.532074	1.03182
chr13:48536075-48536099_-	mmu-let-7d-5p	chr13:48536077-48536099_-	22	24	48536099	48536075	-	Yes	No	572	1124	960	1120	72.3686	130.274	102.158	105.058
chr13:48536075-48536100_-	mmu-let-7d-5p	chr13:48536077-48536099_-	22	25	48536100	48536075	-	No	No	4	3	16	5	0.506074	0.347705	1.70264	0.46901
chr13:48536076-48536096_-	mmu-let-7d-5p	chr13:48536077-48536099_-	22	20	48536096	48536076	-	No	No	2	14	0	2	0.253037	1.62263	0	0.187604
chr13:48536076-48536098_-	mmu-let-7d-5p	chr13:48536077-48536099_-	22	22	48536098	48536076	-	No	No	24	78	41	70	3.03644	9.04034	4.36301	6.56615
chr13:48536076-48536099_-	mmu-let-7d-5p	chr13:48536077-48536099_-	22	23	48536099	48536076	-	Yes	No	3384	6795	6637	7034	428.139	787.553	706.275	659.804
chr13:48536076-48536100_-	mmu-let-7d-5p	chr13:48536077-48536099_-	22	24	48536100	48536076	-	No	No	15	42	40	32	1.89778	4.86788	4.25659	3.00167
chr13:48536077-48536097_-	mmu-let-7d-5p	chr13:48536077-48536099_-	22	20	48536097	48536077	-	No	Yes	10	0	0	0	1.26519	0	0	0
chr13:48536077-48536098_-	mmu-let-7d-5p	chr13:48536077-48536099_-	22	21	48536098	48536077	-	No	Yes	254	311	305	412	32.1357	36.0455	32.4565	38.6465
chr13:48536077-48536099_-	mmu-let-7d-5p	chr13:48536077-48536099_-	22	22	48536099	48536077	-	Yes	Yes	27680	33582	40489	37349	3502.03	3892.21	4308.63	3503.41
chr13:48536077-48536100_-	mmu-let-7d-5p	chr13:48536077-48536099_-	22	23	48536100	48536077	-	No	Yes	180	230	333	269	22.7733	26.6574	35.4361	25.2328
chr13:48536078-48536098_-	mmu-let-7d-5p	chr13:48536077-48536099_-	22	20	48536098	48536078	-	No	No	53	94	68	83	6.70548	10.8948	7.2362	7.78557
chr13:48536078-48536099_-	mmu-let-7d-5p	chr13:48536077-48536099_-	22	21	48536099	48536078	-	Yes	No	6803	11579	11047	12659	860.706	1342.03	1175.56	1187.44
chr13:48536078-48536100_-	mmu-let-7d-5p	chr13:48536077-48536099_-	22	22	48536100	48536078	-	No	No	359	373	565	481	45.4202	43.2314	60.1243	45.1188
chr13:48536079-48536098_-	mmu-let-7d-5p	chr13:48536077-48536099_-	22	19	48536098	48536079	-	No	No	7	13	3	14	0.88563	1.50672	0.319244	1.31323
chr13:48536079-48536099_-	mmu-let-7d-5p	chr13:48536077-48536099_-	22	20	48536099	48536079	-	Yes	No	596	2479	1408	3068	75.405	287.321	149.832	287.785
chr13:48536079-48536100_-	mmu-let-7d-5p	chr13:48536077-48536099_-	22	21	48536100	48536079	-	No	No	30	119	29	128	3.79556	13.7923	3.08603	12.0067
chr13:48536080-48536099_-	mmu-let-7d-5p	chr13:48536077-48536099_-	22	19	48536099	48536080	-	Yes	No	31	151	50	214	3.92207	17.5012	5.32074	20.0736
chr13:48536081-48536099_-	mmu-let-7d-5p	chr13:48536077-48536099_-	22	18	48536099	48536081	-	Yes	No	6	81	51	115	0.759111	9.38805	5.42715	10.7872
chr17:17830410-17830431_+	mmu-let-7e-3p	chr17:17830410-17830432_+	22	21	17830410	17830431	+	Yes	No	12	14	3	24	1.51822	1.62263	0.319244	2.25125
chr17:17830410-17830432_+	mmu-let-7e-3p	chr17:17830410-17830432_+	22	22	17830410	17830432	+	Yes	Yes	57	46	89	68	7.21156	5.33148	9.47091	6.37854
chr17:17830410-17830433_+	mmu-let-7e-3p	chr17:17830410-17830432_+	22	23	17830410	17830433	+	Yes	No	17	6	3	6	2.15082	0.695411	0.319244	0.562813
chr17:17830411-17830432_+	mmu-let-7e-3p	chr17:17830410-17830432_+	22	21	17830411	17830432	+	No	Yes	0	0	6	15	0	0	0.638489	1.40703
chr17:17830411-17830433_+	mmu-let-7e-3p	chr17:17830410-17830432_+	22	22	17830411	17830433	+	No	No	14	0	9	6	1.77126	0	0.957733	0.562813
chr17:17830362-17830387_+	mmu-let-7e-5p	chr17:17830365-17830387_+	22	25	17830362	17830387	+	No	Yes	6	11	3	17	0.759111	1.27492	0.319244	1.59464
chr17:17830362-17830388_+	mmu-let-7e-5p	chr17:17830365-17830387_+	22	26	17830362	17830388	+	No	No	0	6	6	12	0	0.695411	0.638489	1.12563
chr17:17830364-17830387_+	mmu-let-7e-5p	chr17:17830365-17830387_+	22	23	17830364	17830387	+	No	Yes	31	61	39	55	3.92207	7.07001	4.15018	5.15911
chr17:17830364-17830388_+	mmu-let-7e-5p	chr17:17830365-17830387_+	22	24	17830364	17830388	+	No	No	1	11	2	6	0.126519	1.27492	0.21283	0.562813
chr17:17830365-17830383_+	mmu-let-7e-5p	chr17:17830365-17830387_+	22	18	17830365	17830383	+	Yes	No	10	151	51	212	1.26519	17.5012	5.42715	19.886
chr17:17830365-17830384_+	mmu-let-7e-5p	chr17:17830365-17830387_+	22	19	17830365	17830384	+	Yes	No	23	218	47	317	2.90993	25.2666	5.00149	29.7353
chr17:17830365-17830385_+	mmu-let-7e-5p	chr17:17830365-17830387_+	22	20	17830365	17830385	+	Yes	No	329	2828	700	3421	41.6246	327.77	74.4903	320.897
chr17:17830365-17830386_+	mmu-let-7e-5p	chr17:17830365-17830387_+	22	21	17830365	17830386	+	Yes	No	4252	13034	8344	15625	537.957	1510.66	887.925	1465.66
chr17:17830365-17830387_+	mmu-let-7e-5p	chr17:17830365-17830387_+	22	22	17830365	17830387	+	Yes	Yes	21533	67459	35658	81481	2724.32	7818.62	3794.54	7643.09
chr17:17830365-17830388_+	mmu-let-7e-5p	chr17:17830365-17830387_+	22	23	17830365	17830388	+	Yes	No	4782	12896	8702	14593	605.012	1494.67	926.021	1368.85
chr17:17830365-17830389_+	mmu-let-7e-5p	chr17:17830365-17830387_+	22	24	17830365	17830389	+	Yes	No	1221	3618	2319	3411	154.479	419.333	246.776	319.959
chr17:17830365-17830390_+	mmu-let-7e-5p	chr17:17830365-17830387_+	22	25	17830365	17830390	+	Yes	No	132	399	200	411	16.7004	46.2448	21.283	38.5527
chr17:17830365-17830391_+	mmu-let-7e-5p	chr17:17830365-17830387_+	22	26	17830365	17830391	+	Yes	No	21	36	53	65	2.65689	4.17246	5.63998	6.09714
chr17:17830366-17830385_+	mmu-let-7e-5p	chr17:17830365-17830387_+	22	19	17830366	17830385	+	No	No	5	21	1	29	0.632593	2.43394	0.106415	2.72026
chr17:17830366-17830386_+	mmu-let-7e-5p	chr17:17830365-17830387_+	22	20	17830366	17830386	+	No	No	34	138	76	182	4.30163	15.9944	8.08752	17.072
chr17:17830366-17830387_+	mmu-let-7e-5p	chr17:17830365-17830387_+	22	21	17830366	17830387	+	No	Yes	278	788	397	1027	35.1722	91.3306	42.2467	96.3347
chr17:17830366-17830388_+	mmu-let-7e-5p	chr17:17830365-17830387_+	22	22	17830366	17830388	+	No	No	66	145	103	188	8.35022	16.8058	10.9607	17.6348
chr17:17830366-17830389_+	mmu-let-7e-5p	chr17:17830365-17830387_+	22	23	17830366	17830389	+	No	No	30	50	24	57	3.79556	5.79509	2.55395	5.34672
chr17:17830367-17830387_+	mmu-let-7e-5p	chr17:17830365-17830387_+	22	20	17830367	17830387	+	No	Yes	4	13	6	11	0.506074	1.50672	0.638489	1.03182
chr17:17830368-17830387_+	mmu-let-7e-5p	chr17:17830365-17830387_+	22	19	17830368	17830387	+	No	Yes	0	15	11	37	0	1.73853	1.17056	3.47068
chr17:17830368-17830388_+	mmu-let-7e-5p	chr17:17830365-17830387_+	22	20	17830368	17830388	+	No	No	0	17	3	4	0	1.97033	0.319244	0.375208
chr17:17830369-17830387_+	mmu-let-7e-5p	chr17:17830365-17830387_+	22	18	17830369	17830387	+	No	Yes	3	30	15	43	0.379556	3.47705	1.59622	4.03349
chr17:17830369-17830388_+	mmu-let-7e-5p	chr17:17830365-17830387_+	22	19	17830369	17830388	+	No	No	0	7	0	19	0	0.811313	0	1.78224
chr17:17830370-17830388_+	mmu-let-7e-5p	chr17:17830365-17830387_+	22	18	17830370	17830388	+	No	No	0	34	14	39	0	3.94066	1.48981	3.65828
chr17:17830370-17830389_+	mmu-let-7e-5p	chr17:17830365-17830387_+	22	19	17830370	17830389	+	No	No	0	12	4	11	0	1.39082	0.425659	1.03182
chr13:48537832-48537853_-	mmu-let-7f-1-3p	chr13:48537832-48537854_-	22	21	48537853	48537832	-	No	Yes	5	0	23	2	0.632593	0	2.44754	0.187604
chr13:48537832-48537854_-	mmu-let-7f-1-3p	chr13:48537832-48537854_-	22	22	48537854	48537832	-	Yes	Yes	177	52	234	94	22.3938	6.02689	24.9011	8.8174
chr13:48537833-48537854_-	mmu-let-7f-1-3p	chr13:48537832-48537854_-	22	21	48537854	48537833	-	Yes	No	37	63	38	61	4.68119	7.30181	4.04376	5.72193
chrX:151912402-151912424_+	mmu-let-7f-2-3p	chrX:151912402-151912423_+	21	22	151912402	151912424	+	Yes	No	174	101	155	127	22.0142	11.7061	16.4943	11.9129
chrX:151912403-151912424_+	mmu-let-7f-2-3p	chrX:151912402-151912423_+	21	21	151912403	151912424	+	No	No	12	2	7	0	1.51822	0.231804	0.744903	0
chrX:151912347-151912374_+	mmu-let-7f-5p	chrX:151912352-151912374_+	22	27	151912347	151912374	+	No	Yes	0	13	6	7	0	1.50672	0.638489	0.656615
chrX:151912348-151912374_+	mmu-let-7f-5p	chrX:151912352-151912374_+	22	26	151912348	151912374	+	No	Yes	9	4	6	4	1.13867	0.463607	0.638489	0.375208
chrX:151912350-151912373_+	mmu-let-7f-5p	chrX:151912352-151912374_+	22	23	151912350	151912373	+	No	No	0	1	3	12	0	0.115902	0.319244	1.12563
chrX:151912350-151912374_+	mmu-let-7f-5p	chrX:151912352-151912374_+	22	24	151912350	151912374	+	No	Yes	6	28	10	28	0.759111	3.24525	1.06415	2.62646
chrX:151912351-151912373_+	mmu-let-7f-5p	chrX:151912352-151912374_+	22	22	151912351	151912373	+	No	No	10	26	51	34	1.26519	3.01345	5.42715	3.18927
chrX:151912351-151912374_+	mmu-let-7f-5p	chrX:151912352-151912374_+	22	23	151912351	151912374	+	No	Yes	101	158	197	179	12.7784	18.3125	20.9637	16.7906
chrX:151912351-151912375_+	mmu-let-7f-5p	chrX:151912352-151912374_+	22	24	151912351	151912375	+	No	No	6	35	10	17	0.759111	4.05656	1.06415	1.59464
chrX:151912352-151912370_+	mmu-let-7f-5p	chrX:151912352-151912374_+	22	18	151912352	151912370	+	Yes	No	62	97	133	194	7.84415	11.2425	14.1532	18.1976
chrX:151912352-151912371_+	mmu-let-7f-5p	chrX:151912352-151912374_+	22	19	151912352	151912371	+	Yes	No	117	213	179	396	14.8027	24.6871	19.0482	37.1456
chrX:151912352-151912372_+	mmu-let-7f-5p	chrX:151912352-151912374_+	22	20	151912352	151912372	+	Yes	No	1058	4040	2513	5918	133.857	468.243	267.42	555.121
chrX:151912352-151912373_+	mmu-let-7f-5p	chrX:151912352-151912374_+	22	21	151912352	151912373	+	Yes	No	25144	51580	49957	65490	3181.18	5978.21	5316.16	6143.1
chrX:151912352-151912374_+	mmu-let-7f-5p	chrX:151912352-151912374_+	22	22	151912352	151912374	+	Yes	Yes	205422	315382	341146	351475	25989.7	36553.3	36303	32969.1
chrX:151912352-151912375_+	mmu-let-7f-5p	chrX:151912352-151912374_+	22	23	151912352	151912375	+	Yes	No	22570	50256	41467	54130	2855.52	5824.76	4412.7	5077.51
chrX:151912352-151912376_+	mmu-let-7f-5p	chrX:151912352-151912374_+	22	24	151912352	151912376	+	Yes	No	595	1484	1214	1711	75.2785	171.998	129.188	160.495
chrX:151912352-151912377_+	mmu-let-7f-5p	chrX:151912352-151912374_+	22	25	151912352	151912377	+	Yes	No	31	84	76	134	3.92207	9.73575	8.08752	12.5695
chrX:151912353-151912372_+	mmu-let-7f-5p	chrX:151912352-151912374_+	22	19	151912353	151912372	+	No	No	11	43	32	83	1.3917	4.98378	3.40527	7.78557
chrX:151912353-151912373_+	mmu-let-7f-5p	chrX:151912352-151912374_+	22	20	151912353	151912373	+	No	No	336	719	612	955	42.5102	83.3334	65.1258	89.581
chrX:151912353-151912374_+	mmu-let-7f-5p	chrX:151912352-151912374_+	22	21	151912353	151912374	+	No	Yes	2962	4757	4707	5598	374.748	551.345	500.894	525.104
chrX:151912353-151912375_+	mmu-let-7f-5p	chrX:151912352-151912374_+	22	22	151912353	151912375	+	No	No	344	813	559	878	43.5224	94.2282	59.4859	82.3582
chrX:151912353-151912376_+	mmu-let-7f-5p	chrX:151912352-151912374_+	22	23	151912353	151912376	+	No	No	8	20	17	23	1.01215	2.31804	1.80905	2.15745
chrX:151912354-151912374_+	mmu-let-7f-5p	chrX:151912352-151912374_+	22	20	151912354	151912374	+	No	Yes	7	15	13	13	0.88563	1.73853	1.38339	1.21943
chrX:151912355-151912373_+	mmu-let-7f-5p	chrX:151912352-151912374_+	22	18	151912355	151912373	+	No	No	7	17	7	13	0.88563	1.97033	0.744903	1.21943
chrX:151912355-151912374_+	mmu-let-7f-5p	chrX:151912352-151912374_+	22	19	151912355	151912374	+	No	Yes	50	139	107	175	6.32593	16.1104	11.3864	16.4154
chrX:151912355-151912375_+	mmu-let-7f-5p	chrX:151912352-151912374_+	22	20	151912355	151912375	+	No	No	17	14	17	10	2.15082	1.62263	1.80905	0.938021
chrX:151912356-151912374_+	mmu-let-7f-5p	chrX:151912352-151912374_+	22	18	151912356	151912374	+	No	Yes	81	148	105	159	10.248	17.1535	11.1736	14.9145
chrX:151912356-151912375_+	mmu-let-7f-5p	chrX:151912352-151912374_+	22	19	151912356	151912375	+	No	No	13	37	14	42	1.64474	4.28837	1.48981	3.93969
chrX:151912357-151912375_+	mmu-let-7f-5p	chrX:151912352-151912374_+	22	18	151912357	151912375	+	No	No	4	13	14	5	0.506074	1.50672	1.48981	0.46901
chr9:106178902-106178923_+	mmu-let-7g-3p	chr9:106178901-106178923_+	22	21	106178902	106178923	+	No	Yes	17	2	13	11	2.15082	0.231804	1.38339	1.03182
chr9:106178902-106178924_+	mmu-let-7g-3p	chr9:106178901-106178923_+	22	22	106178902	106178924	+	No	No	11	20	39	32	1.3917	2.31804	4.15018	3.00167
chr9:106178842-106178866_+	mmu-let-7g-5p	chr9:106178845-106178867_+	22	24	106178842	106178866	+	No	No	2	11	0	6	0.253037	1.27492	0	0.562813
chr9:106178842-106178867_+	mmu-let-7g-5p	chr9:106178845-106178867_+	22	25	106178842	106178867	+	No	Yes	14	18	10	22	1.77126	2.08623	1.06415	2.06365
chr9:106178844-106178865_+	mmu-let-7g-5p	chr9:106178845-106178867_+	22	21	106178844	106178865	+	No	No	0	4	0	12	0	0.463607	0	1.12563
chr9:106178844-106178866_+	mmu-let-7g-5p	chr9:106178845-106178867_+	22	22	106178844	106178866	+	No	No	38	44	40	78	4.8077	5.09968	4.25659	7.31656
chr9:106178844-106178867_+	mmu-let-7g-5p	chr9:106178845-106178867_+	22	23	106178844	106178867	+	No	Yes	137	107	195	193	17.333	12.4015	20.7509	18.1038
chr9:106178844-106178868_+	mmu-let-7g-5p	chr9:106178845-106178867_+	22	24	106178844	106178868	+	No	No	15	12	9	11	1.89778	1.39082	0.957733	1.03182
chr9:106178845-106178863_+	mmu-let-7g-5p	chr9:106178845-106178867_+	22	18	106178845	106178863	+	Yes	No	32	41	60	28	4.04859	4.75197	6.38489	2.62646
chr9:106178845-106178864_+	mmu-let-7g-5p	chr9:106178845-106178867_+	22	19	106178845	106178864	+	Yes	No	57	113	80	191	7.21156	13.0969	8.51318	17.9162
chr9:106178845-106178865_+	mmu-let-7g-5p	chr9:106178845-106178867_+	22	20	106178845	106178865	+	Yes	No	355	1131	869	2060	44.9141	131.085	92.4744	193.232
chr9:106178845-106178866_+	mmu-let-7g-5p	chr9:106178845-106178867_+	22	21	106178845	106178866	+	Yes	No	8386	14043	16065	20721	1060.98	1627.61	1709.55	1943.67
chr9:106178845-106178867_+	mmu-let-7g-5p	chr9:106178845-106178867_+	22	22	106178845	106178867	+	Yes	Yes	70441	110883	128961	143003	8912.09	12851.5	13723.4	13414
chr9:106178845-106178868_+	mmu-let-7g-5p	chr9:106178845-106178867_+	22	23	106178845	106178868	+	Yes	No	4335	9543	9580	12152	548.458	1106.05	1019.45	1139.88
chr9:106178845-106178869_+	mmu-let-7g-5p	chr9:106178845-106178867_+	22	24	106178845	106178869	+	Yes	No	454	929	924	1200	57.4394	107.673	98.3272	112.563
chr9:106178845-106178870_+	mmu-let-7g-5p	chr9:106178845-106178867_+	22	25	106178845	106178870	+	Yes	No	22	66	45	30	2.78341	7.64952	4.78866	2.81406
chr9:106178846-106178865_+	mmu-let-7g-5p	chr9:106178845-106178867_+	22	19	106178846	106178865	+	No	No	3	12	13	38	0.379556	1.39082	1.38339	3.56448
chr9:106178846-106178866_+	mmu-let-7g-5p	chr9:106178845-106178867_+	22	20	106178846	106178866	+	No	No	216	329	463	581	27.328	38.1317	49.27	54.499
chr9:106178846-106178867_+	mmu-let-7g-5p	chr9:106178845-106178867_+	22	21	106178846	106178867	+	No	Yes	1797	3338	3569	4561	227.354	386.88	379.794	427.831
chr9:106178846-106178868_+	mmu-let-7g-5p	chr9:106178845-106178867_+	22	22	106178846	106178868	+	No	No	145	365	265	388	18.3452	42.3042	28.1999	36.3952
chr9:106178846-106178869_+	mmu-let-7g-5p	chr9:106178845-106178867_+	22	23	106178846	106178869	+	No	No	27	47	29	30	3.416	5.44738	3.08603	2.81406
chr9:106178848-106178867_+	mmu-let-7g-5p	chr9:106178845-106178867_+	22	19	106178848	106178867	+	No	Yes	8	7	1	2	1.01215	0.811313	0.106415	0.187604
chr10:122985640-122985663_-	mmu-let-7i-3p	chr10:122985641-122985663_-	22	23	122985663	122985640	-	Yes	No	8	2	0	5	1.01215	0.231804	0	0.46901
chr10:122985641-122985663_-	mmu-let-7i-3p	chr10:122985641-122985663_-	22	22	122985663	122985641	-	Yes	Yes	102	135	117	172	12.9049	15.6467	12.4505	16.134
chr10:122985642-122985663_-	mmu-let-7i-3p	chr10:122985641-122985663_-	22	21	122985663	122985642	-	Yes	No	93	69	71	99	11.7662	7.99722	7.55545	9.28641
chr10:122985643-122985663_-	mmu-let-7i-3p	chr10:122985641-122985663_-	22	20	122985663	122985643	-	Yes	No	17	41	16	85	2.15082	4.75197	1.70264	7.97318
chr10:122985694-122985719_-	mmu-let-7i-5p	chr10:122985697-122985719_-	22	25	122985719	122985694	-	Yes	No	81	139	161	243	10.248	16.1104	17.1328	22.7939
chr10:122985695-122985718_-	mmu-let-7i-5p	chr10:122985697-122985719_-	22	23	122985718	122985695	-	No	No	4	17	14	28	0.506074	1.97033	1.48981	2.62646
chr10:122985695-122985719_-	mmu-let-7i-5p	chr10:122985697-122985719_-	22	24	122985719	122985695	-	Yes	No	789	1411	1509	1895	99.8231	163.537	160.58	177.755
chr10:122985696-122985715_-	mmu-let-7i-5p	chr10:122985697-122985719_-	22	19	122985715	122985696	-	No	No	6	12	4	7	0.759111	1.39082	0.425659	0.656615
chr10:122985696-122985716_-	mmu-let-7i-5p	chr10:122985697-122985719_-	22	20	122985716	122985696	-	No	No	2	4	4	21	0.253037	0.463607	0.425659	1.96984
chr10:122985696-122985718_-	mmu-let-7i-5p	chr10:122985697-122985719_-	22	22	122985718	122985696	-	No	No	151	264	243	371	19.1043	30.5981	25.8588	34.8006
chr10:122985696-122985719_-	mmu-let-7i-5p	chr10:122985697-122985719_-	22	23	122985719	122985696	-	Yes	No	16220	29354	28072	37948	2052.13	3402.18	2987.28	3559.6
chr10:122985696-122985720_-	mmu-let-7i-5p	chr10:122985697-122985719_-	22	24	122985720	122985696	-	No	No	12	2	5	17	1.51822	0.231804	0.532074	1.59464
chr10:122985697-122985715_-	mmu-let-7i-5p	chr10:122985697-122985719_-	22	18	122985715	122985697	-	No	Yes	30	85	49	89	3.79556	9.85165	5.21432	8.34839
chr10:122985697-122985716_-	mmu-let-7i-5p	chr10:122985697-122985719_-	22	19	122985716	122985697	-	No	Yes	82	108	58	104	10.3745	12.5174	6.17206	9.75542
chr10:122985697-122985717_-	mmu-let-7i-5p	chr10:122985697-122985719_-	22	20	122985717	122985697	-	No	Yes	3	21	30	29	0.379556	2.43394	3.19244	2.72026
chr10:122985697-122985718_-	mmu-let-7i-5p	chr10:122985697-122985719_-	22	21	122985718	122985697	-	No	Yes	1146	1819	1497	2460	144.99	210.825	159.303	230.753
chr10:122985697-122985719_-	mmu-let-7i-5p	chr10:122985697-122985719_-	22	22	122985719	122985697	-	Yes	Yes	139159	228831	203674	298356	17606.2	26521.9	21673.9	27986.4
chr10:122985697-122985720_-	mmu-let-7i-5p	chr10:122985697-122985719_-	22	23	122985720	122985697	-	No	Yes	49	92	85	102	6.19941	10.663	9.04526	9.56781
chr10:122985697-122985721_-	mmu-let-7i-5p	chr10:122985697-122985719_-	22	24	122985721	122985697	-	No	Yes	9	22	11	7	1.13867	2.54984	1.17056	0.656615
chr10:122985697-122985722_-	mmu-let-7i-5p	chr10:122985697-122985719_-	22	25	122985722	122985697	-	No	Yes	10	42	24	41	1.26519	4.86788	2.55395	3.84589
chr10:122985698-122985716_-	mmu-let-7i-5p	chr10:122985697-122985719_-	22	18	122985716	122985698	-	No	No	4	15	8	18	0.506074	1.73853	0.851318	1.68844
chr10:122985698-122985718_-	mmu-let-7i-5p	chr10:122985697-122985719_-	22	20	122985718	122985698	-	No	No	165	314	231	431	20.8756	36.3932	24.5818	40.4287
chr10:122985698-122985719_-	mmu-let-7i-5p	chr10:122985697-122985719_-	22	21	122985719	122985698	-	Yes	No	22767	43689	37538	61740	2880.45	5063.63	3994.6	5791.34
chr10:122985698-122985720_-	mmu-let-7i-5p	chr10:122985697-122985719_-	22	22	122985720	122985698	-	No	No	14	20	32	30	1.77126	2.31804	3.40527	2.81406
chr10:122985698-122985721_-	mmu-let-7i-5p	chr10:122985697-122985719_-	22	23	122985721	122985698	-	No	No	4	18	9	11	0.506074	2.08623	0.957733	1.03182
chr10:122985698-122985722_-	mmu-let-7i-5p	chr10:122985697-122985719_-	22	24	122985722	122985698	-	No	No	2	8	13	12	0.253037	0.927214	1.38339	1.12563
chr10:122985699-122985718_-	mmu-let-7i-5p	chr10:122985697-122985719_-	22	19	122985718	122985699	-	No	No	28	80	19	107	3.54252	9.27214	2.02188	10.0368
chr10:122985699-122985719_-	mmu-let-7i-5p	chr10:122985697-122985719_-	22	20	122985719	122985699	-	Yes	No	2211	8824	3603	13299	279.732	1022.72	383.412	1247.47
chr10:122985699-122985720_-	mmu-let-7i-5p	chr10:122985697-122985719_-	22	21	122985720	122985699	-	No	No	2	5	14	4	0.253037	0.579509	1.48981	0.375208
chr10:122985700-122985718_-	mmu-let-7i-5p	chr10:122985697-122985719_-	22	18	122985718	122985700	-	No	No	6	14	11	25	0.759111	1.62263	1.17056	2.34505
chr10:122985700-122985719_-	mmu-let-7i-5p	chr10:122985697-122985719_-	22	19	122985719	122985700	-	Yes	No	356	925	454	1147	45.0406	107.209	48.3123	107.591
chr10:122985701-122985719_-	mmu-let-7i-5p	chr10:122985697-122985719_-	22	18	122985719	122985701	-	Yes	No	101	197	131	200	12.7784	22.8327	13.9403	18.7604
chr9:41531435-41531457_+	mmu-miR-100-5p	chr9:41531436-41531458_+	22	22	41531435	41531457	+	No	No	12	9	11	12	1.51822	1.04312	1.17056	1.12563
chr9:41531436-41531457_+	mmu-miR-100-5p	chr9:41531436-41531458_+	22	21	41531436	41531457	+	Yes	No	119	145	82	93	15.0557	16.8058	8.72601	8.72359
chr9:41531436-41531458_+	mmu-miR-100-5p	chr9:41531436-41531458_+	22	22	41531436	41531458	+	Yes	Yes	71	61	74	35	8.98282	7.07001	7.87469	3.28307
chr9:41531436-41531459_+	mmu-miR-100-5p	chr9:41531436-41531458_+	22	23	41531436	41531459	+	Yes	No	72	128	52	47	9.10933	14.8354	5.53357	4.4087
chr9:41531437-41531458_+	mmu-miR-100-5p	chr9:41531436-41531458_+	22	21	41531437	41531458	+	No	Yes	6	12	0	0	0.759111	1.39082	0	0
chr9:41531437-41531459_+	mmu-miR-100-5p	chr9:41531436-41531458_+	22	22	41531437	41531459	+	No	No	11	5	0	0	1.3917	0.579509	0	0
chr9:41531439-41531457_+	mmu-miR-100-5p	chr9:41531436-41531458_+	22	18	41531439	41531457	+	No	No	14	9	5	11	1.77126	1.04312	0.532074	1.03182
chr9:41531439-41531458_+	mmu-miR-100-5p	chr9:41531436-41531458_+	22	19	41531439	41531458	+	No	Yes	4	11	2	2	0.506074	1.27492	0.21283	0.187604
chr9:41531439-41531459_+	mmu-miR-100-5p	chr9:41531436-41531458_+	22	20	41531439	41531459	+	No	No	7	11	4	12	0.88563	1.27492	0.425659	1.12563
chr9:41531440-41531458_+	mmu-miR-100-5p	chr9:41531436-41531458_+	22	18	41531440	41531458	+	No	Yes	10	6	4	4	1.26519	0.695411	0.425659	0.375208
chr9:41531440-41531459_+	mmu-miR-100-5p	chr9:41531436-41531458_+	22	19	41531440	41531459	+	No	No	12	3	10	12	1.51822	0.347705	1.06415	1.12563
chr4:101346953-101346977_-	mmu-miR-101a-3p	chr4:101346956-101346977_-	21	24	101346977	101346953	-	Yes	No	3	3	13	6	0.379556	0.347705	1.38339	0.562813
chr4:101346953-101346978_-	mmu-miR-101a-3p	chr4:101346956-101346977_-	21	25	101346978	101346953	-	No	No	9	3	0	0	1.13867	0.347705	0	0
chr4:101346954-101346976_-	mmu-miR-101a-3p	chr4:101346956-101346977_-	21	22	101346976	101346954	-	No	No	6	28	10	19	0.759111	3.24525	1.06415	1.78224
chr4:101346954-101346977_-	mmu-miR-101a-3p	chr4:101346956-101346977_-	21	23	101346977	101346954	-	Yes	No	646	1017	795	837	81.731	117.872	84.5997	78.5123
chr4:101346954-101346978_-	mmu-miR-101a-3p	chr4:101346956-101346977_-	21	24	101346978	101346954	-	No	No	47	97	91	101	5.94637	11.2425	9.68374	9.47401
chr4:101346955-101346976_-	mmu-miR-101a-3p	chr4:101346956-101346977_-	21	21	101346976	101346955	-	No	No	79	71	62	117	9.99496	8.22903	6.59772	10.9748
chr4:101346955-101346977_-	mmu-miR-101a-3p	chr4:101346956-101346977_-	21	22	101346977	101346955	-	Yes	No	11892	15466	14203	15022	1504.56	1792.54	1511.41	1409.09
chr4:101346955-101346978_-	mmu-miR-101a-3p	chr4:101346956-101346977_-	21	23	101346978	101346955	-	No	No	978	1206	1205	1331	123.735	139.778	128.23	124.851
chr4:101346956-101346976_-	mmu-miR-101a-3p	chr4:101346956-101346977_-	21	20	101346976	101346956	-	No	Yes	25	40	42	37	3.16296	4.63607	4.46942	3.47068
chr4:101346956-101346977_-	mmu-miR-101a-3p	chr4:101346956-101346977_-	21	21	101346977	101346956	-	Yes	Yes	2344	3371	2635	3844	296.559	390.705	280.403	360.575
chr4:101346956-101346978_-	mmu-miR-101a-3p	chr4:101346956-101346977_-	21	22	101346978	101346956	-	No	Yes	6397	6636	6918	6621	809.339	769.124	736.177	621.064
chr4:101346957-101346977_-	mmu-miR-101a-3p	chr4:101346956-101346977_-	21	20	101346977	101346957	-	Yes	No	547	874	981	1055	69.2056	101.298	104.393	98.9612
chr4:101346957-101346978_-	mmu-miR-101a-3p	chr4:101346956-101346977_-	21	21	101346978	101346957	-	No	No	2816	3065	3532	4153	356.276	355.239	375.857	389.56
chr4:101346958-101346977_-	mmu-miR-101a-3p	chr4:101346956-101346977_-	21	19	101346977	101346958	-	Yes	No	74	189	165	274	9.36237	21.9054	17.5584	25.7018
chr4:101346958-101346978_-	mmu-miR-101a-3p	chr4:101346956-101346977_-	21	20	101346978	101346958	-	No	No	141	409	269	644	17.8391	47.4038	28.6256	60.4085
chr4:101346959-101346977_-	mmu-miR-101a-3p	chr4:101346956-101346977_-	21	18	101346977	101346959	-	Yes	No	72	169	97	245	9.10933	19.5874	10.3222	22.9815
chr4:101346959-101346978_-	mmu-miR-101a-3p	chr4:101346956-101346977_-	21	19	101346978	101346959	-	No	No	302	703	631	1099	38.2086	81.479	67.1477	103.088
chr4:101346991-101347013_-	mmu-miR-101a-5p	chr4:101346992-101347014_-	22	22	101347013	101346991	-	No	No	17	10	14	2	2.15082	1.15902	1.48981	0.187604
chr4:101346992-101347014_-	mmu-miR-101a-5p	chr4:101346992-101347014_-	22	22	101347014	101346992	-	Yes	Yes	1	2	9	16	0.126519	0.231804	0.957733	1.50083
chr4:101346993-101347013_-	mmu-miR-101a-5p	chr4:101346992-101347014_-	22	20	101347013	101346993	-	No	No	9	14	10	8	1.13867	1.62263	1.06415	0.750417
chr4:101346993-101347014_-	mmu-miR-101a-5p	chr4:101346992-101347014_-	22	21	101347014	101346993	-	Yes	No	1	10	0	12	0.126519	1.15902	0	1.12563
chr19:29135337-29135355_+	mmu-miR-101b-3p	chr19:29135337-29135356_+	19	18	29135337	29135355	+	Yes	No	0	5	3	18	0	0.579509	0.319244	1.68844
chr19:29135337-29135356_+	mmu-miR-101b-3p	chr19:29135337-29135356_+	19	19	29135337	29135356	+	Yes	Yes	81	99	62	170	10.248	11.4743	6.59772	15.9464
chr19:29135337-29135357_+	mmu-miR-101b-3p	chr19:29135337-29135356_+	19	20	29135337	29135357	+	Yes	No	248	314	157	393	31.3766	36.3932	16.7071	36.8642
chr19:29135337-29135358_+	mmu-miR-101b-3p	chr19:29135337-29135356_+	19	21	29135337	29135358	+	Yes	No	1403	1425	1337	1994	177.506	165.16	142.277	187.041
chr19:29135337-29135359_+	mmu-miR-101b-3p	chr19:29135337-29135356_+	19	22	29135337	29135359	+	Yes	No	1315	3349	1515	5496	166.372	388.155	161.218	515.536
chr19:29135337-29135360_+	mmu-miR-101b-3p	chr19:29135337-29135356_+	19	23	29135337	29135360	+	Yes	No	450	696	621	951	56.9333	80.6677	66.0836	89.2058
chr19:29135337-29135361_+	mmu-miR-101b-3p	chr19:29135337-29135356_+	19	24	29135337	29135361	+	Yes	No	45	55	67	118	5.69333	6.3746	7.12979	11.0686
chr19:29135338-29135356_+	mmu-miR-101b-3p	chr19:29135337-29135356_+	19	18	29135338	29135356	+	No	Yes	29	55	17	40	3.66904	6.3746	1.80905	3.75208
chr19:29135338-29135357_+	mmu-miR-101b-3p	chr19:29135337-29135356_+	19	19	29135338	29135357	+	No	No	74	131	86	134	9.36237	15.1831	9.15167	12.5695
chr19:29135338-29135358_+	mmu-miR-101b-3p	chr19:29135337-29135356_+	19	20	29135338	29135358	+	No	No	182	272	214	257	23.0264	31.5253	22.7728	24.1071
chr19:29135338-29135359_+	mmu-miR-101b-3p	chr19:29135337-29135356_+	19	21	29135338	29135359	+	No	No	274	645	416	1096	34.6661	74.7567	44.2685	102.807
chr19:29135338-29135360_+	mmu-miR-101b-3p	chr19:29135337-29135356_+	19	22	29135338	29135360	+	No	No	1780	4016	2146	5947	225.203	465.462	228.366	557.841
chr19:29135338-29135361_+	mmu-miR-101b-3p	chr19:29135337-29135356_+	19	23	29135338	29135361	+	No	No	508	1692	738	2209	64.2714	196.106	78.5341	207.209
chr19:29135338-29135362_+	mmu-miR-101b-3p	chr19:29135337-29135356_+	19	24	29135338	29135362	+	No	No	13	32	30	42	1.64474	3.70886	3.19244	3.93969
chr19:29135338-29135363_+	mmu-miR-101b-3p	chr19:29135337-29135356_+	19	25	29135338	29135363	+	No	No	4	7	3	14	0.506074	0.811313	0.319244	1.31323
chr19:29135339-29135359_+	mmu-miR-101b-3p	chr19:29135337-29135356_+	19	20	29135339	29135359	+	No	No	4	7	19	9	0.506074	0.811313	2.02188	0.844219
chr19:29135339-29135360_+	mmu-miR-101b-3p	chr19:29135337-29135356_+	19	21	29135339	29135360	+	No	No	45	95	63	154	5.69333	11.0107	6.70413	14.4455
chr19:29135339-29135361_+	mmu-miR-101b-3p	chr19:29135337-29135356_+	19	22	29135339	29135361	+	No	No	41	107	90	204	5.18726	12.4015	9.57733	19.1356
chr19:29135339-29135362_+	mmu-miR-101b-3p	chr19:29135337-29135356_+	19	23	29135339	29135362	+	No	No	0	9	5	25	0	1.04312	0.532074	2.34505
chr19:29135340-29135360_+	mmu-miR-101b-3p	chr19:29135337-29135356_+	19	20	29135340	29135360	+	No	No	6	2	4	20	0.759111	0.231804	0.425659	1.87604
chr19:29135340-29135361_+	mmu-miR-101b-3p	chr19:29135337-29135356_+	19	21	29135340	29135361	+	No	No	1	15	2	12	0.126519	1.73853	0.21283	1.12563
chr9:3038677-3038698_-	mmu-miR-101c	chr9:3038679-3038698_-	19	21	3038698	3038677	-	Yes	No	24	81	26	66	3.03644	9.38805	2.76678	6.19094
chr9:3038677-3038699_-	mmu-miR-101c	chr9:3038679-3038698_-	19	22	3038699	3038677	-	No	No	512	2049	568	1040	64.7775	237.483	60.4436	97.5542
chr9:3038677-3038700_-	mmu-miR-101c	chr9:3038679-3038698_-	19	23	3038700	3038677	-	No	No	17	20	10	5	2.15082	2.31804	1.06415	0.46901
chr9:3038678-3038699_-	mmu-miR-101c	chr9:3038679-3038698_-	19	21	3038699	3038678	-	No	No	6	25	10	28	0.759111	2.89755	1.06415	2.62646
chr9:3038678-3038700_-	mmu-miR-101c	chr9:3038679-3038698_-	19	22	3038700	3038678	-	No	No	21	20	20	34	2.65689	2.31804	2.1283	3.18927
chr9:3038679-3038700_-	mmu-miR-101c	chr9:3038679-3038698_-	19	21	3038700	3038679	-	No	Yes	19	15	17	19	2.40385	1.73853	1.80905	1.78224
chr11:35782445-35782468_+	mmu-miR-103-3p	chr11:35782446-35782469_+	23	23	35782445	35782468	+	No	No	8	5	2	8	1.01215	0.579509	0.21283	0.750417
chr11:35782446-35782464_+	mmu-miR-103-3p	chr11:35782446-35782469_+	23	18	35782446	35782464	+	Yes	No	35	68	64	122	4.42815	7.88132	6.81055	11.4439
chr11:35782446-35782465_+	mmu-miR-103-3p	chr11:35782446-35782469_+	23	19	35782446	35782465	+	Yes	No	56	191	92	310	7.08504	22.1372	9.79016	29.0786
chr11:35782446-35782466_+	mmu-miR-103-3p	chr11:35782446-35782469_+	23	20	35782446	35782466	+	Yes	No	91	353	123	545	11.5132	40.9133	13.089	51.1221
chr11:35782446-35782467_+	mmu-miR-103-3p	chr11:35782446-35782469_+	23	21	35782446	35782467	+	Yes	No	1329	1490	1520	2032	168.143	172.694	161.75	190.606
chr11:35782446-35782468_+	mmu-miR-103-3p	chr11:35782446-35782469_+	23	22	35782446	35782468	+	Yes	No	9687	8511	11850	12777	1225.59	986.44	1261.01	1198.51
chr11:35782446-35782469_+	mmu-miR-103-3p	chr11:35782446-35782469_+	23	23	35782446	35782469	+	Yes	Yes	11235	11716	17490	14960	1421.44	1357.91	1861.19	1403.28
chr11:35782446-35782470_+	mmu-miR-103-3p	chr11:35782446-35782469_+	23	24	35782446	35782470	+	Yes	No	1010	1506	1745	1971	127.784	174.548	185.694	184.884
chr11:35782446-35782471_+	mmu-miR-103-3p	chr11:35782446-35782469_+	23	25	35782446	35782471	+	Yes	No	226	339	370	374	28.5932	39.2907	39.3735	35.082
chr11:35782446-35782472_+	mmu-miR-103-3p	chr11:35782446-35782469_+	23	26	35782446	35782472	+	Yes	No	23	15	25	32	2.90993	1.73853	2.66037	3.00167
chr11:35782447-35782467_+	mmu-miR-103-3p	chr11:35782446-35782469_+	23	20	35782447	35782467	+	No	No	5	12	10	10	0.632593	1.39082	1.06415	0.938021
chr11:35782447-35782468_+	mmu-miR-103-3p	chr11:35782446-35782469_+	23	21	35782447	35782468	+	No	No	64	53	71	113	8.09719	6.1428	7.55545	10.5996
chr11:35782447-35782469_+	mmu-miR-103-3p	chr11:35782446-35782469_+	23	22	35782447	35782469	+	No	Yes	80	92	118	140	10.1215	10.663	12.5569	13.1323
chr11:35782447-35782470_+	mmu-miR-103-3p	chr11:35782446-35782469_+	23	23	35782447	35782470	+	No	No	14	16	13	17	1.77126	1.85443	1.38339	1.59464
chr11:35782448-35782468_+	mmu-miR-103-3p	chr11:35782446-35782469_+	23	20	35782448	35782468	+	No	No	26	36	24	25	3.28948	4.17246	2.55395	2.34505
chr11:35782448-35782469_+	mmu-miR-103-3p	chr11:35782446-35782469_+	23	21	35782448	35782469	+	No	Yes	179	108	165	120	22.6468	12.5174	17.5584	11.2563
chr11:35782448-35782470_+	mmu-miR-103-3p	chr11:35782446-35782469_+	23	22	35782448	35782470	+	No	No	22	21	30	22	2.78341	2.43394	3.19244	2.06365
chr11:35782449-35782469_+	mmu-miR-103-3p	chr11:35782446-35782469_+	23	20	35782449	35782469	+	No	Yes	10	2	5	7	1.26519	0.231804	0.532074	0.656615
chr11:35782450-35782469_+	mmu-miR-103-3p	chr11:35782446-35782469_+	23	19	35782450	35782469	+	No	Yes	23	24	29	47	2.90993	2.78164	3.08603	4.4087
chrX:52742540-52742563_-	mmu-miR-106a-5p	chrX:52742540-52742563_-	23	23	52742563	52742540	-	Yes	Yes	6	1	9	1	0.759111	0.115902	0.957733	0.0938021
chr5:138165742-138165767_-	mmu-miR-106b-3p	chr5:138165745-138165767_-	22	25	138165767	138165742	-	Yes	No	12	20	8	0	1.51822	2.31804	0.851318	0
chr5:138165743-138165767_-	mmu-miR-106b-3p	chr5:138165745-138165767_-	22	24	138165767	138165743	-	Yes	No	201	188	256	175	25.4302	21.7895	27.2422	16.4154
chr5:138165744-138165766_-	mmu-miR-106b-3p	chr5:138165745-138165767_-	22	22	138165766	138165744	-	No	No	0	8	41	15	0	0.927214	4.36301	1.40703
chr5:138165744-138165767_-	mmu-miR-106b-3p	chr5:138165745-138165767_-	22	23	138165767	138165744	-	Yes	No	761	552	716	476	96.2806	63.9778	76.193	44.6498
chr5:138165744-138165768_-	mmu-miR-106b-3p	chr5:138165745-138165767_-	22	24	138165768	138165744	-	No	No	3	6	11	0	0.379556	0.695411	1.17056	0
chr5:138165745-138165766_-	mmu-miR-106b-3p	chr5:138165745-138165767_-	22	21	138165766	138165745	-	No	Yes	77	27	60	24	9.74193	3.12935	6.38489	2.25125
chr5:138165745-138165767_-	mmu-miR-106b-3p	chr5:138165745-138165767_-	22	22	138165767	138165745	-	Yes	Yes	2767	1554	3040	1814	350.077	180.111	323.501	170.157
chr5:138165745-138165768_-	mmu-miR-106b-3p	chr5:138165745-138165767_-	22	23	138165768	138165745	-	No	Yes	53	26	65	27	6.70548	3.01345	6.91696	2.53266
chr5:138165745-138165769_-	mmu-miR-106b-3p	chr5:138165745-138165767_-	22	24	138165769	138165745	-	No	Yes	72	33	109	37	9.10933	3.82476	11.5992	3.47068
chr5:138165746-138165766_-	mmu-miR-106b-3p	chr5:138165745-138165767_-	22	20	138165766	138165746	-	No	No	31	39	45	30	3.92207	4.52017	4.78866	2.81406
chr5:138165746-138165767_-	mmu-miR-106b-3p	chr5:138165745-138165767_-	22	21	138165767	138165746	-	Yes	No	2695	1669	2687	1912	340.967	193.44	285.936	179.35
chr5:138165746-138165768_-	mmu-miR-106b-3p	chr5:138165745-138165767_-	22	22	138165768	138165746	-	No	No	133	50	92	43	16.827	5.79509	9.79016	4.03349
chr5:138165746-138165769_-	mmu-miR-106b-3p	chr5:138165745-138165767_-	22	23	138165769	138165746	-	No	No	63	33	37	74	7.97067	3.82476	3.93735	6.94135
chr5:138165747-138165766_-	mmu-miR-106b-3p	chr5:138165745-138165767_-	22	19	138165766	138165747	-	No	No	45	59	39	45	5.69333	6.83821	4.15018	4.22109
chr5:138165747-138165767_-	mmu-miR-106b-3p	chr5:138165745-138165767_-	22	20	138165767	138165747	-	Yes	No	2315	2277	2269	2779	292.89	263.908	241.455	260.676
chr5:138165747-138165768_-	mmu-miR-106b-3p	chr5:138165745-138165767_-	22	21	138165768	138165747	-	No	No	217	174	232	169	27.4545	20.1669	24.6882	15.8526
chr5:138165747-138165769_-	mmu-miR-106b-3p	chr5:138165745-138165767_-	22	22	138165769	138165747	-	No	No	1874	1346	2011	1519	237.096	156.004	214	142.485
chr5:138165748-138165767_-	mmu-miR-106b-3p	chr5:138165745-138165767_-	22	19	138165767	138165748	-	Yes	No	470	479	530	506	59.4637	55.517	56.3998	47.4639
chr5:138165748-138165768_-	mmu-miR-106b-3p	chr5:138165745-138165767_-	22	20	138165768	138165748	-	No	No	28	43	39	28	3.54252	4.98378	4.15018	2.62646
chr5:138165748-138165769_-	mmu-miR-106b-3p	chr5:138165745-138165767_-	22	21	138165769	138165748	-	No	No	215	137	216	152	27.2015	15.8785	22.9856	14.2579
chr5:138165749-138165767_-	mmu-miR-106b-3p	chr5:138165745-138165767_-	22	18	138165767	138165749	-	Yes	No	7	71	19	88	0.88563	8.22903	2.02188	8.25458
chr5:138165749-138165769_-	mmu-miR-106b-3p	chr5:138165745-138165767_-	22	20	138165769	138165749	-	No	No	0	1	1	16	0	0.115902	0.106415	1.50083
chr5:138165751-138165769_-	mmu-miR-106b-3p	chr5:138165745-138165767_-	22	18	138165769	138165751	-	No	No	5	9	2	30	0.632593	1.04312	0.21283	2.81406
chr5:138165783-138165807_-	mmu-miR-106b-5p	chr5:138165786-138165807_-	21	24	138165807	138165783	-	Yes	No	16	7	28	10	2.0243	0.811313	2.97961	0.938021
chr5:138165784-138165807_-	mmu-miR-106b-5p	chr5:138165786-138165807_-	21	23	138165807	138165784	-	Yes	No	55	59	96	56	6.95852	6.83821	10.2158	5.25292
chr5:138165785-138165806_-	mmu-miR-106b-5p	chr5:138165786-138165807_-	21	21	138165806	138165785	-	No	No	2	11	0	8	0.253037	1.27492	0	0.750417
chr5:138165785-138165807_-	mmu-miR-106b-5p	chr5:138165786-138165807_-	21	22	138165807	138165785	-	Yes	No	405	301	482	302	51.24	34.8864	51.2919	28.3282
chr5:138165786-138165807_-	mmu-miR-106b-5p	chr5:138165786-138165807_-	21	21	138165807	138165786	-	Yes	Yes	384	448	577	471	48.5831	51.924	61.4013	44.1808
chr5:138165787-138165807_-	mmu-miR-106b-5p	chr5:138165786-138165807_-	21	20	138165807	138165787	-	Yes	No	237	229	279	295	29.9849	26.5415	29.6897	27.6716
chr5:138165788-138165807_-	mmu-miR-106b-5p	chr5:138165786-138165807_-	21	19	138165807	138165788	-	Yes	No	57	31	30	83	7.21156	3.59296	3.19244	7.78557
chr5:138165789-138165807_-	mmu-miR-106b-5p	chr5:138165786-138165807_-	21	18	138165807	138165789	-	Yes	No	5	26	10	5	0.632593	3.01345	1.06415	0.46901
chr19:34820697-34820722_-	mmu-miR-107-3p	chr19:34820699-34820722_-	23	25	34820722	34820697	-	Yes	No	16	13	3	2	2.0243	1.50672	0.319244	0.187604
chr19:34820698-34820722_-	mmu-miR-107-3p	chr19:34820699-34820722_-	23	24	34820722	34820698	-	Yes	No	63	31	53	50	7.97067	3.59296	5.63998	4.6901
chr19:34820699-34820722_-	mmu-miR-107-3p	chr19:34820699-34820722_-	23	23	34820722	34820699	-	Yes	Yes	474	195	690	340	59.9698	22.6009	73.4262	31.8927
chr19:34820700-34820721_-	mmu-miR-107-3p	chr19:34820699-34820722_-	23	21	34820721	34820700	-	No	No	12	4	14	8	1.51822	0.463607	1.48981	0.750417
chr19:34820700-34820722_-	mmu-miR-107-3p	chr19:34820699-34820722_-	23	22	34820722	34820700	-	Yes	No	1226	525	1481	740	155.112	60.8484	157.6	69.4135
chr19:34820701-34820721_-	mmu-miR-107-3p	chr19:34820699-34820722_-	23	20	34820721	34820701	-	No	No	5	8	20	15	0.632593	0.927214	2.1283	1.40703
chr19:34820701-34820722_-	mmu-miR-107-3p	chr19:34820699-34820722_-	23	21	34820722	34820701	-	Yes	No	1333	1504	1602	2167	168.649	174.316	170.476	203.269
chr19:34820702-34820722_-	mmu-miR-107-3p	chr19:34820699-34820722_-	23	20	34820722	34820702	-	Yes	No	94	326	122	513	11.8927	37.784	12.9826	48.1205
chr19:34820703-34820722_-	mmu-miR-107-3p	chr19:34820699-34820722_-	23	19	34820722	34820703	-	Yes	No	56	202	81	296	7.08504	23.4122	8.6196	27.7654
chr19:34820704-34820722_-	mmu-miR-107-3p	chr19:34820699-34820722_-	23	18	34820722	34820704	-	Yes	No	30	69	59	112	3.79556	7.99722	6.27847	10.5058
chr11:96317226-96317247_+	mmu-miR-10a-3p	chr11:96317226-96317248_+	22	21	96317226	96317247	+	Yes	No	84	30	92	38	10.6276	3.47705	9.79016	3.56448
chr11:96317226-96317248_+	mmu-miR-10a-3p	chr11:96317226-96317248_+	22	22	96317226	96317248	+	Yes	Yes	9	3	12	15	1.13867	0.347705	1.27698	1.40703
chr11:96317227-96317247_+	mmu-miR-10a-3p	chr11:96317226-96317248_+	22	20	96317227	96317247	+	No	No	5	2	16	6	0.632593	0.231804	1.70264	0.562813
chr11:96317183-96317207_+	mmu-miR-10a-5p	chr11:96317185-96317208_+	23	24	96317183	96317207	+	No	No	28	16	33	15	3.54252	1.85443	3.51169	1.40703
chr11:96317184-96317204_+	mmu-miR-10a-5p	chr11:96317185-96317208_+	23	20	96317184	96317204	+	No	No	4	6	8	16	0.506074	0.695411	0.851318	1.50083
chr11:96317184-96317205_+	mmu-miR-10a-5p	chr11:96317185-96317208_+	23	21	96317184	96317205	+	No	No	94	53	63	109	11.8927	6.1428	6.70413	10.2244
chr11:96317184-96317206_+	mmu-miR-10a-5p	chr11:96317185-96317208_+	23	22	96317184	96317206	+	No	No	450	362	298	353	56.9333	41.9565	31.7116	33.1121
chr11:96317184-96317207_+	mmu-miR-10a-5p	chr11:96317185-96317208_+	23	23	96317184	96317207	+	No	No	3092	2590	3011	3237	391.195	300.186	320.415	303.637
chr11:96317184-96317208_+	mmu-miR-10a-5p	chr11:96317185-96317208_+	23	24	96317184	96317208	+	No	Yes	160	120	168	155	20.243	13.9082	17.8777	14.5393
chr11:96317184-96317209_+	mmu-miR-10a-5p	chr11:96317185-96317208_+	23	25	96317184	96317209	+	No	No	149	117	132	133	18.8513	13.5605	14.0467	12.4757
chr11:96317185-96317203_+	mmu-miR-10a-5p	chr11:96317185-96317208_+	23	18	96317185	96317203	+	Yes	No	30	29	14	50	3.79556	3.36115	1.48981	4.6901
chr11:96317185-96317204_+	mmu-miR-10a-5p	chr11:96317185-96317208_+	23	19	96317185	96317204	+	Yes	No	89	134	161	242	11.2601	15.5308	17.1328	22.7001
chr11:96317185-96317205_+	mmu-miR-10a-5p	chr11:96317185-96317208_+	23	20	96317185	96317205	+	Yes	No	311	560	369	949	39.3473	64.905	39.267	89.0182
chr11:96317185-96317206_+	mmu-miR-10a-5p	chr11:96317185-96317208_+	23	21	96317185	96317206	+	Yes	No	2265	3885	2367	4521	286.564	450.279	251.884	424.079
chr11:96317185-96317207_+	mmu-miR-10a-5p	chr11:96317185-96317208_+	23	22	96317185	96317207	+	Yes	No	307637	227065	291637	278134	38921.8	26317.2	31034.5	26089.5
chr11:96317185-96317208_+	mmu-miR-10a-5p	chr11:96317185-96317208_+	23	23	96317185	96317208	+	Yes	Yes	33112	23144	29463	24464	4189.28	2682.43	3135.3	2294.77
chr11:96317185-96317209_+	mmu-miR-10a-5p	chr11:96317185-96317208_+	23	24	96317185	96317209	+	Yes	No	23131	23792	25920	28898	2926.5	2757.54	2758.27	2710.69
chr11:96317185-96317210_+	mmu-miR-10a-5p	chr11:96317185-96317208_+	23	25	96317185	96317210	+	Yes	No	342	376	410	452	43.2693	43.5791	43.6301	42.3985
chr11:96317185-96317211_+	mmu-miR-10a-5p	chr11:96317185-96317208_+	23	26	96317185	96317211	+	Yes	No	71	81	71	71	8.98282	9.38805	7.55545	6.65995
chr11:96317185-96317212_+	mmu-miR-10a-5p	chr11:96317185-96317208_+	23	27	96317185	96317212	+	Yes	No	2	11	2	6	0.253037	1.27492	0.21283	0.562813
chr11:96317186-96317204_+	mmu-miR-10a-5p	chr11:96317185-96317208_+	23	18	96317186	96317204	+	No	No	28	22	38	62	3.54252	2.54984	4.04376	5.81573
chr11:96317186-96317205_+	mmu-miR-10a-5p	chr11:96317185-96317208_+	23	19	96317186	96317205	+	No	No	47	59	46	129	5.94637	6.83821	4.89508	12.1005
chr11:96317186-96317206_+	mmu-miR-10a-5p	chr11:96317185-96317208_+	23	20	96317186	96317206	+	No	No	240	500	325	607	30.3644	57.9509	34.5848	56.9379
chr11:96317186-96317207_+	mmu-miR-10a-5p	chr11:96317185-96317208_+	23	21	96317186	96317207	+	No	No	40581	35975	42876	49108	5134.25	4169.57	4562.64	4606.43
chr11:96317186-96317208_+	mmu-miR-10a-5p	chr11:96317185-96317208_+	23	22	96317186	96317208	+	No	Yes	37457	24263	32256	24463	4739	2812.13	3432.51	2294.68
chr11:96317186-96317209_+	mmu-miR-10a-5p	chr11:96317185-96317208_+	23	23	96317186	96317209	+	No	No	34963	33549	39168	41486	4423.47	3888.39	4168.05	3891.47
chr11:96317186-96317210_+	mmu-miR-10a-5p	chr11:96317185-96317208_+	23	24	96317186	96317210	+	No	No	583	729	536	662	73.7603	84.4924	57.0383	62.097
chr11:96317186-96317211_+	mmu-miR-10a-5p	chr11:96317185-96317208_+	23	25	96317186	96317211	+	No	No	101	122	127	135	12.7784	14.14	13.5147	12.6633
chr11:96317186-96317212_+	mmu-miR-10a-5p	chr11:96317185-96317208_+	23	26	96317186	96317212	+	No	No	9	5	0	13	1.13867	0.579509	0	1.21943
chr11:96317187-96317207_+	mmu-miR-10a-5p	chr11:96317185-96317208_+	23	20	96317187	96317207	+	No	No	229	202	236	246	28.9727	23.4122	25.1139	23.0753
chr11:96317187-96317208_+	mmu-miR-10a-5p	chr11:96317185-96317208_+	23	21	96317187	96317208	+	No	Yes	263	225	293	228	33.2744	26.0779	31.1795	21.3869
chr11:96317187-96317209_+	mmu-miR-10a-5p	chr11:96317185-96317208_+	23	22	96317187	96317209	+	No	No	401	353	487	441	50.7339	40.9133	51.824	41.3667
chr11:96317187-96317210_+	mmu-miR-10a-5p	chr11:96317185-96317208_+	23	23	96317187	96317210	+	No	No	17	16	11	28	2.15082	1.85443	1.17056	2.62646
chr11:96317188-96317206_+	mmu-miR-10a-5p	chr11:96317185-96317208_+	23	18	96317188	96317206	+	No	No	4	1	3	19	0.506074	0.115902	0.319244	1.78224
chr11:96317188-96317207_+	mmu-miR-10a-5p	chr11:96317185-96317208_+	23	19	96317188	96317207	+	No	No	877	570	674	777	110.957	66.064	71.7236	72.8842
chr11:96317188-96317208_+	mmu-miR-10a-5p	chr11:96317185-96317208_+	23	20	96317188	96317208	+	No	Yes	289	221	265	147	36.5639	25.6143	28.1999	13.7889
chr11:96317188-96317209_+	mmu-miR-10a-5p	chr11:96317185-96317208_+	23	21	96317188	96317209	+	No	No	249	299	220	287	31.5031	34.6546	23.4112	26.9212
chr11:96317188-96317210_+	mmu-miR-10a-5p	chr11:96317185-96317208_+	23	22	96317188	96317210	+	No	No	10	4	1	11	1.26519	0.463607	0.106415	1.03182
chr11:96317189-96317207_+	mmu-miR-10a-5p	chr11:96317185-96317208_+	23	18	96317189	96317207	+	No	No	891	479	764	772	112.728	55.517	81.3009	72.4152
chr11:96317189-96317208_+	mmu-miR-10a-5p	chr11:96317185-96317208_+	23	19	96317189	96317208	+	No	Yes	316	210	188	141	39.9799	24.3394	20.006	13.2261
chr11:96317189-96317209_+	mmu-miR-10a-5p	chr11:96317185-96317208_+	23	20	96317189	96317209	+	No	No	221	177	191	232	27.9606	20.5146	20.3252	21.7621
chr11:96317189-96317210_+	mmu-miR-10a-5p	chr11:96317185-96317208_+	23	21	96317189	96317210	+	No	No	21	5	5	4	2.65689	0.579509	0.532074	0.375208
chr11:96317190-96317208_+	mmu-miR-10a-5p	chr11:96317185-96317208_+	23	18	96317190	96317208	+	No	Yes	67	35	65	55	8.47674	4.05656	6.91696	5.15911
chr11:96317190-96317209_+	mmu-miR-10a-5p	chr11:96317185-96317208_+	23	19	96317190	96317209	+	No	No	46	39	44	30	5.81985	4.52017	4.68225	2.81406
chr2:74726073-74726095_+	mmu-miR-10b-5p	chr2:74726073-74726096_+	23	22	74726073	74726095	+	Yes	No	129	118	102	87	16.3209	13.6764	10.8543	8.16078
chr2:74726073-74726096_+	mmu-miR-10b-5p	chr2:74726073-74726096_+	23	23	74726073	74726096	+	Yes	Yes	4	11	7	7	0.506074	1.27492	0.744903	0.656615
chr2:74726073-74726097_+	mmu-miR-10b-5p	chr2:74726073-74726096_+	23	24	74726073	74726097	+	Yes	No	6	14	6	6	0.759111	1.62263	0.638489	0.562813
chr2:74726074-74726095_+	mmu-miR-10b-5p	chr2:74726073-74726096_+	23	21	74726074	74726095	+	No	No	7	20	6	9	0.88563	2.31804	0.638489	0.844219
chr2:74726074-74726097_+	mmu-miR-10b-5p	chr2:74726073-74726096_+	23	23	74726074	74726097	+	No	No	18	2	5	14	2.27733	0.231804	0.532074	1.31323
chr10:81416275-81416297_-	mmu-miR-1191b-5p	chr10:81416275-81416297_-	22	22	81416297	81416275	-	Yes	Yes	26	23	10	26	3.28948	2.66574	1.06415	2.43885
chrX:7807179-7807201_+	mmu-miR-1198-3p	chrX:7807179-7807201_+	22	22	7807179	7807201	+	Yes	Yes	0	1	9	14	0	0.115902	0.957733	1.31323
chrX:7807141-7807160_+	mmu-miR-1198-5p	chrX:7807141-7807163_+	22	19	7807141	7807160	+	Yes	No	20	45	9	40	2.53037	5.21558	0.957733	3.75208
chrX:7807141-7807161_+	mmu-miR-1198-5p	chrX:7807141-7807163_+	22	20	7807141	7807161	+	Yes	No	22	124	18	160	2.78341	14.3718	1.91547	15.0083
chrX:7807141-7807162_+	mmu-miR-1198-5p	chrX:7807141-7807163_+	22	21	7807141	7807162	+	Yes	No	83	133	122	185	10.501	15.4149	12.9826	17.3534
chrX:7807141-7807163_+	mmu-miR-1198-5p	chrX:7807141-7807163_+	22	22	7807141	7807163	+	Yes	Yes	1896	1173	2110	1630	239.879	135.953	224.535	152.897
chrX:7807141-7807164_+	mmu-miR-1198-5p	chrX:7807141-7807163_+	22	23	7807141	7807164	+	Yes	No	318	262	416	352	40.2329	30.3663	44.2685	33.0183
chrX:7807141-7807165_+	mmu-miR-1198-5p	chrX:7807141-7807163_+	22	24	7807141	7807165	+	Yes	No	93	123	126	160	11.7662	14.2559	13.4083	15.0083
chrX:7807141-7807166_+	mmu-miR-1198-5p	chrX:7807141-7807163_+	22	25	7807141	7807166	+	Yes	No	25	44	65	85	3.16296	5.09968	6.91696	7.97318
chrX:7807141-7807167_+	mmu-miR-1198-5p	chrX:7807141-7807163_+	22	26	7807141	7807167	+	Yes	No	46	27	45	27	5.81985	3.12935	4.78866	2.53266
chr8:84011590-84011613_-	mmu-miR-1199-5p	chr8:84011593-84011613_-	20	23	84011613	84011590	-	Yes	No	16	8	4	16	2.0243	0.927214	0.425659	1.50083
chr8:84011591-84011613_-	mmu-miR-1199-5p	chr8:84011593-84011613_-	20	22	84011613	84011591	-	Yes	No	111	61	84	58	14.0436	7.07001	8.93884	5.44052
chr8:84011593-84011613_-	mmu-miR-1199-5p	chr8:84011593-84011613_-	20	20	84011613	84011593	-	Yes	Yes	70	84	37	85	8.8563	9.73575	3.93735	7.97318
chr17:80194912-80194932_-	mmu-miR-12189-3p	chr17:80194912-80194932_-	20	20	80194932	80194912	-	Yes	Yes	13	6	7	14	1.64474	0.695411	0.744903	1.31323
chr18:34759573-34759594_+	mmu-miR-12191-3p	chr18:34759574-34759595_+	21	21	34759573	34759594	+	No	No	0	0	13	0	0	0	1.38339	0
chr18:34759574-34759595_+	mmu-miR-12191-3p	chr18:34759574-34759595_+	21	21	34759574	34759595	+	Yes	Yes	3	8	15	3	0.379556	0.927214	1.59622	0.281406
chr18:34759575-34759593_+	mmu-miR-12191-3p	chr18:34759574-34759595_+	21	18	34759575	34759593	+	No	No	0	1	15	0	0	0.115902	1.59622	0
chr18:34759578-34759597_+	mmu-miR-12191-3p	chr18:34759574-34759595_+	21	19	34759578	34759597	+	No	No	9	0	0	0	1.13867	0	0	0
chr1:135454603-135454625_-	mmu-miR-1231-3p	chr1:135454602-135454625_-	23	22	135454625	135454603	-	Yes	No	4	0	4	13	0.506074	0	0.425659	1.21943
chr15:84951542-84951566_-	mmu-miR-1249-3p	chr15:84951544-84951566_-	22	24	84951566	84951542	-	Yes	No	8	5	8	0	1.01215	0.579509	0.851318	0
chr15:84951543-84951566_-	mmu-miR-1249-3p	chr15:84951544-84951566_-	22	23	84951566	84951543	-	Yes	No	56	0	49	7	7.08504	0	5.21432	0.656615
chr15:84951544-84951566_-	mmu-miR-1249-3p	chr15:84951544-84951566_-	22	22	84951566	84951544	-	Yes	Yes	320	23	329	98	40.4859	2.66574	35.0105	9.1926
chr15:84951545-84951566_-	mmu-miR-1249-3p	chr15:84951544-84951566_-	22	21	84951566	84951545	-	Yes	No	147	22	111	23	18.5982	2.54984	11.812	2.15745
chr15:84951545-84951567_-	mmu-miR-1249-3p	chr15:84951544-84951566_-	22	22	84951567	84951545	-	No	No	4	0	10	0	0.506074	0	1.06415	0
chr15:84951546-84951566_-	mmu-miR-1249-3p	chr15:84951544-84951566_-	22	20	84951566	84951546	-	Yes	No	114	50	124	106	14.4231	5.79509	13.1954	9.94302
chr15:84951547-84951566_-	mmu-miR-1249-3p	chr15:84951544-84951566_-	22	19	84951566	84951547	-	Yes	No	58	14	27	63	7.33808	1.62263	2.8732	5.90953
chr15:84951579-84951603_-	mmu-miR-1249-5p	chr15:84951578-84951603_-	25	24	84951603	84951579	-	Yes	No	6	12	5	23	0.759111	1.39082	0.532074	2.15745
chr15:84951582-84951603_-	mmu-miR-1249-5p	chr15:84951578-84951603_-	25	21	84951603	84951582	-	Yes	No	0	0	0	14	0	0	0	1.31323
chr15:84951584-84951603_-	mmu-miR-1249-5p	chr15:84951578-84951603_-	25	19	84951603	84951584	-	Yes	No	0	10	0	4	0	1.15902	0	0.375208
chr17:17830854-17830874_+	mmu-miR-125a-3p	chr17:17830854-17830876_+	22	20	17830854	17830874	+	Yes	No	29	147	14	219	3.66904	17.0376	1.48981	20.5427
chr17:17830854-17830875_+	mmu-miR-125a-3p	chr17:17830854-17830876_+	22	21	17830854	17830875	+	Yes	No	171	612	164	712	21.6347	70.9319	17.452	66.7871
chr17:17830854-17830876_+	mmu-miR-125a-3p	chr17:17830854-17830876_+	22	22	17830854	17830876	+	Yes	Yes	156	252	157	295	19.7369	29.2073	16.7071	27.6716
chr17:17830854-17830877_+	mmu-miR-125a-3p	chr17:17830854-17830876_+	22	23	17830854	17830877	+	Yes	No	20	15	8	48	2.53037	1.73853	0.851318	4.5025
chr17:17830854-17830878_+	mmu-miR-125a-3p	chr17:17830854-17830876_+	22	24	17830854	17830878	+	Yes	No	5	0	4	19	0.632593	0	0.425659	1.78224
chr17:17830855-17830875_+	mmu-miR-125a-3p	chr17:17830854-17830876_+	22	20	17830855	17830875	+	No	No	6	20	13	55	0.759111	2.31804	1.38339	5.15911
chr17:17830855-17830876_+	mmu-miR-125a-3p	chr17:17830854-17830876_+	22	21	17830855	17830876	+	No	Yes	9	53	26	63	1.13867	6.1428	2.76678	5.90953
chr17:17830815-17830838_+	mmu-miR-125a-5p	chr17:17830816-17830840_+	24	23	17830815	17830838	+	No	No	0	8	9	9	0	0.927214	0.957733	0.844219
chr17:17830815-17830840_+	mmu-miR-125a-5p	chr17:17830816-17830840_+	24	25	17830815	17830840	+	No	Yes	9	43	13	36	1.13867	4.98378	1.38339	3.37688
chr17:17830816-17830834_+	mmu-miR-125a-5p	chr17:17830816-17830840_+	24	18	17830816	17830834	+	Yes	No	0	15	3	10	0	1.73853	0.319244	0.938021
chr17:17830816-17830835_+	mmu-miR-125a-5p	chr17:17830816-17830840_+	24	19	17830816	17830835	+	Yes	No	34	79	52	136	4.30163	9.15624	5.53357	12.7571
chr17:17830816-17830836_+	mmu-miR-125a-5p	chr17:17830816-17830840_+	24	20	17830816	17830836	+	Yes	No	95	149	143	298	12.0193	17.2694	15.2173	27.953
chr17:17830816-17830837_+	mmu-miR-125a-5p	chr17:17830816-17830840_+	24	21	17830816	17830837	+	Yes	No	190	726	397	950	24.0385	84.1447	42.2467	89.112
chr17:17830816-17830838_+	mmu-miR-125a-5p	chr17:17830816-17830840_+	24	22	17830816	17830838	+	Yes	No	5052	7575	8595	11843	639.172	877.956	914.635	1110.9
chr17:17830816-17830839_+	mmu-miR-125a-5p	chr17:17830816-17830840_+	24	23	17830816	17830839	+	Yes	No	4067	6916	5408	9873	514.551	801.577	575.491	926.108
chr17:17830816-17830840_+	mmu-miR-125a-5p	chr17:17830816-17830840_+	24	24	17830816	17830840	+	Yes	Yes	32940	87638	37435	116775	4167.52	10157.4	3983.64	10953.7
chr17:17830816-17830841_+	mmu-miR-125a-5p	chr17:17830816-17830840_+	24	25	17830816	17830841	+	Yes	No	1557	5303	1859	6413	196.989	614.627	197.825	601.553
chr17:17830816-17830842_+	mmu-miR-125a-5p	chr17:17830816-17830840_+	24	26	17830816	17830842	+	Yes	No	119	449	159	501	15.0557	52.0399	16.9199	46.9948
chr17:17830817-17830838_+	mmu-miR-125a-5p	chr17:17830816-17830840_+	24	21	17830817	17830838	+	No	No	10	10	6	7	1.26519	1.15902	0.638489	0.656615
chr17:17830817-17830840_+	mmu-miR-125a-5p	chr17:17830816-17830840_+	24	23	17830817	17830840	+	No	Yes	110	242	142	358	13.917	28.0482	15.1109	33.5811
chr17:17830817-17830841_+	mmu-miR-125a-5p	chr17:17830816-17830840_+	24	24	17830817	17830841	+	No	No	0	13	15	17	0	1.50672	1.59622	1.59464
chr17:17830818-17830837_+	mmu-miR-125a-5p	chr17:17830816-17830840_+	24	19	17830818	17830837	+	No	No	0	8	1	13	0	0.927214	0.106415	1.21943
chr17:17830818-17830838_+	mmu-miR-125a-5p	chr17:17830816-17830840_+	24	20	17830818	17830838	+	No	No	60	103	103	172	7.59111	11.9379	10.9607	16.134
chr17:17830818-17830839_+	mmu-miR-125a-5p	chr17:17830816-17830840_+	24	21	17830818	17830839	+	No	No	22	48	39	81	2.78341	5.56329	4.15018	7.59797
chr17:17830818-17830840_+	mmu-miR-125a-5p	chr17:17830816-17830840_+	24	22	17830818	17830840	+	No	Yes	327	777	289	1237	41.3716	90.0557	30.7539	116.033
chr17:17830818-17830841_+	mmu-miR-125a-5p	chr17:17830816-17830840_+	24	23	17830818	17830841	+	No	No	7	59	12	53	0.88563	6.83821	1.27698	4.97151
chr17:17830818-17830842_+	mmu-miR-125a-5p	chr17:17830816-17830840_+	24	24	17830818	17830842	+	No	No	0	10	1	1	0	1.15902	0.106415	0.0938021
chr17:17830819-17830839_+	mmu-miR-125a-5p	chr17:17830816-17830840_+	24	20	17830819	17830839	+	No	No	11	19	23	23	1.3917	2.20213	2.44754	2.15745
chr17:17830819-17830840_+	mmu-miR-125a-5p	chr17:17830816-17830840_+	24	21	17830819	17830840	+	No	Yes	3	12	11	40	0.379556	1.39082	1.17056	3.75208
chr17:17830820-17830838_+	mmu-miR-125a-5p	chr17:17830816-17830840_+	24	18	17830820	17830838	+	No	No	17	18	17	39	2.15082	2.08623	1.80905	3.65828
chr17:17830820-17830839_+	mmu-miR-125a-5p	chr17:17830816-17830840_+	24	19	17830820	17830839	+	No	No	41	86	54	104	5.18726	9.96756	5.7464	9.75542
chr17:17830820-17830840_+	mmu-miR-125a-5p	chr17:17830816-17830840_+	24	20	17830820	17830840	+	No	Yes	41	68	32	94	5.18726	7.88132	3.40527	8.8174
chr17:17830822-17830840_+	mmu-miR-125a-5p	chr17:17830816-17830840_+	24	18	17830822	17830840	+	No	Yes	0	1	0	29	0	0.115902	0	2.72026
chr9:41581978-41582000_+	mmu-miR-125b-1-3p	chr9:41581979-41582001_+	22	22	41581978	41582000	+	No	No	16	16	0	4	2.0243	1.85443	0	0.375208
chr9:41581979-41581999_+	mmu-miR-125b-1-3p	chr9:41581979-41582001_+	22	20	41581979	41581999	+	Yes	No	9	35	13	5	1.13867	4.05656	1.38339	0.46901
chr9:41581979-41582000_+	mmu-miR-125b-1-3p	chr9:41581979-41582001_+	22	21	41581979	41582000	+	Yes	No	56	37	75	8	7.08504	4.28837	7.98111	0.750417
chr9:41581979-41582001_+	mmu-miR-125b-1-3p	chr9:41581979-41582001_+	22	22	41581979	41582001	+	Yes	Yes	15	21	28	2	1.89778	2.43394	2.97961	0.187604
chr16:77646314-77646333_+	mmu-miR-125b-2-3p	chr16:77646317-77646339_+	22	19	77646314	77646333	+	No	No	3	21	7	34	0.379556	2.43394	0.744903	3.18927
chr16:77646314-77646334_+	mmu-miR-125b-2-3p	chr16:77646317-77646339_+	22	20	77646314	77646334	+	No	No	0	28	6	17	0	3.24525	0.638489	1.59464
chr16:77646314-77646335_+	mmu-miR-125b-2-3p	chr16:77646317-77646339_+	22	21	77646314	77646335	+	No	No	59	42	69	39	7.46459	4.86788	7.34262	3.65828
chr16:77646314-77646336_+	mmu-miR-125b-2-3p	chr16:77646317-77646339_+	22	22	77646314	77646336	+	No	No	15	18	24	53	1.89778	2.08623	2.55395	4.97151
chr16:77646314-77646337_+	mmu-miR-125b-2-3p	chr16:77646317-77646339_+	22	23	77646314	77646337	+	No	No	336	219	433	319	42.5102	25.3825	46.0776	29.9229
chr16:77646314-77646338_+	mmu-miR-125b-2-3p	chr16:77646317-77646339_+	22	24	77646314	77646338	+	No	No	104	110	149	202	13.1579	12.7492	15.8558	18.948
chr16:77646315-77646336_+	mmu-miR-125b-2-3p	chr16:77646317-77646339_+	22	21	77646315	77646336	+	No	No	2	5	0	14	0.253037	0.579509	0	1.31323
chr16:77646315-77646337_+	mmu-miR-125b-2-3p	chr16:77646317-77646339_+	22	22	77646315	77646337	+	No	No	1232	1311	1802	1633	155.871	151.947	191.759	153.179
chr16:77646315-77646338_+	mmu-miR-125b-2-3p	chr16:77646317-77646339_+	22	23	77646315	77646338	+	No	No	450	490	784	587	56.9333	56.7919	83.4292	55.0618
chr16:77646315-77646339_+	mmu-miR-125b-2-3p	chr16:77646317-77646339_+	22	24	77646315	77646339	+	No	Yes	0	17	8	11	0	1.97033	0.851318	1.03182
chr16:77646316-77646337_+	mmu-miR-125b-2-3p	chr16:77646317-77646339_+	22	21	77646316	77646337	+	No	No	52	56	54	60	6.57896	6.4905	5.7464	5.62813
chr16:77646316-77646338_+	mmu-miR-125b-2-3p	chr16:77646317-77646339_+	22	22	77646316	77646338	+	No	No	50	21	69	51	6.32593	2.43394	7.34262	4.78391
chr16:77646317-77646336_+	mmu-miR-125b-2-3p	chr16:77646317-77646339_+	22	19	77646317	77646336	+	Yes	No	1	3	10	12	0.126519	0.347705	1.06415	1.12563
chr16:77646317-77646337_+	mmu-miR-125b-2-3p	chr16:77646317-77646339_+	22	20	77646317	77646337	+	Yes	No	1295	2553	1798	4203	163.842	295.897	191.334	394.25
chr16:77646317-77646338_+	mmu-miR-125b-2-3p	chr16:77646317-77646339_+	22	21	77646317	77646338	+	Yes	No	2258	1672	3087	2748	285.679	193.788	328.502	257.768
chr16:77646317-77646339_+	mmu-miR-125b-2-3p	chr16:77646317-77646339_+	22	22	77646317	77646339	+	Yes	Yes	1119	285	1232	445	141.574	33.032	131.103	41.7419
chr16:77646317-77646340_+	mmu-miR-125b-2-3p	chr16:77646317-77646339_+	22	23	77646317	77646340	+	Yes	No	51	52	66	59	6.45245	6.02689	7.02337	5.53432
chr16:77646317-77646341_+	mmu-miR-125b-2-3p	chr16:77646317-77646339_+	22	24	77646317	77646341	+	Yes	No	109	136	249	200	13.7905	15.7626	26.4973	18.7604
chr16:77646317-77646342_+	mmu-miR-125b-2-3p	chr16:77646317-77646339_+	22	25	77646317	77646342	+	Yes	No	0	10	16	4	0	1.15902	1.70264	0.375208
chr16:77646318-77646337_+	mmu-miR-125b-2-3p	chr16:77646317-77646339_+	22	19	77646318	77646337	+	No	No	7	30	15	65	0.88563	3.47705	1.59622	6.09714
chr16:77646318-77646338_+	mmu-miR-125b-2-3p	chr16:77646317-77646339_+	22	20	77646318	77646338	+	No	No	47	37	42	40	5.94637	4.28837	4.46942	3.75208
chr16:77646318-77646339_+	mmu-miR-125b-2-3p	chr16:77646317-77646339_+	22	21	77646318	77646339	+	No	Yes	49	6	43	23	6.19941	0.695411	4.57583	2.15745
chr9:41581939-41581958_+	mmu-miR-125b-5p	chr9:41581939-41581961_+	22	19	41581939	41581958	+	Yes	No	6	13	10	15	0.759111	1.50672	1.06415	1.40703
chr9:41581939-41581959_+	mmu-miR-125b-5p	chr9:41581939-41581961_+	22	20	41581939	41581959	+	Yes	No	308	395	453	545	38.9677	45.7812	48.2059	51.1221
chr9:41581939-41581960_+	mmu-miR-125b-5p	chr9:41581939-41581961_+	22	21	41581939	41581960	+	Yes	No	771	787	1076	1198	97.5458	91.2147	114.502	112.375
chr9:41581939-41581961_+	mmu-miR-125b-5p	chr9:41581939-41581961_+	22	22	41581939	41581961	+	Yes	Yes	2806	2477	3998	3211	355.011	287.089	425.446	301.198
chr9:41581939-41581962_+	mmu-miR-125b-5p	chr9:41581939-41581961_+	22	23	41581939	41581962	+	Yes	No	133	194	223	241	16.827	22.4849	23.7305	22.6063
chr9:41581939-41581963_+	mmu-miR-125b-5p	chr9:41581939-41581961_+	22	24	41581939	41581963	+	Yes	No	8	37	14	34	1.01215	4.28837	1.48981	3.18927
chr9:41581940-41581959_+	mmu-miR-125b-5p	chr9:41581939-41581961_+	22	19	41581940	41581959	+	No	No	0	4	12	5	0	0.463607	1.27698	0.46901
chr9:41581940-41581960_+	mmu-miR-125b-5p	chr9:41581939-41581961_+	22	20	41581940	41581960	+	No	No	6	11	5	21	0.759111	1.27492	0.532074	1.96984
chr9:41581940-41581961_+	mmu-miR-125b-5p	chr9:41581939-41581961_+	22	21	41581940	41581961	+	No	Yes	358	355	399	388	45.2936	41.1451	42.4595	36.3952
chr9:41581940-41581962_+	mmu-miR-125b-5p	chr9:41581939-41581961_+	22	22	41581940	41581962	+	No	No	40	28	43	36	5.06074	3.24525	4.57583	3.37688
chr9:41581941-41581959_+	mmu-miR-125b-5p	chr9:41581939-41581961_+	22	18	41581941	41581959	+	No	No	8	9	6	10	1.01215	1.04312	0.638489	0.938021
chr9:41581941-41581960_+	mmu-miR-125b-5p	chr9:41581939-41581961_+	22	19	41581941	41581960	+	No	No	7	12	10	6	0.88563	1.39082	1.06415	0.562813
chr9:41581941-41581961_+	mmu-miR-125b-5p	chr9:41581939-41581961_+	22	20	41581941	41581961	+	No	Yes	37	49	63	48	4.68119	5.67919	6.70413	4.5025
chr9:41581941-41581962_+	mmu-miR-125b-5p	chr9:41581939-41581961_+	22	21	41581941	41581962	+	No	No	11	3	3	5	1.3917	0.347705	0.319244	0.46901
chr9:41581942-41581961_+	mmu-miR-125b-5p	chr9:41581939-41581961_+	22	19	41581942	41581961	+	No	Yes	17	3	14	18	2.15082	0.347705	1.48981	1.68844
chr9:41581943-41581961_+	mmu-miR-125b-5p	chr9:41581939-41581961_+	22	18	41581943	41581961	+	No	Yes	78	55	87	101	9.86845	6.3746	9.25808	9.47401
chr2:26591401-26591423_+	mmu-miR-126a-3p	chr2:26591401-26591423_+	22	22	26591401	26591423	+	Yes	Yes	45	27	30	17	5.69333	3.12935	3.19244	1.59464
chr2:26591402-26591422_+	mmu-miR-126a-3p	chr2:26591401-26591423_+	22	20	26591402	26591422	+	No	No	8	0	1	0	1.01215	0	0.106415	0
chr2:26591402-26591423_+	mmu-miR-126a-3p	chr2:26591401-26591423_+	22	21	26591402	26591423	+	No	Yes	10	7	4	5	1.26519	0.811313	0.425659	0.46901
chr2:26591364-26591385_+	mmu-miR-126a-5p	chr2:26591364-26591385_+	21	21	26591364	26591385	+	Yes	Yes	60	29	28	44	7.59111	3.36115	2.97961	4.12729
chr12:109592887-109592907_+	mmu-miR-127-3p	chr12:109592887-109592909_+	22	20	109592887	109592907	+	Yes	No	10	67	10	19	1.26519	7.76542	1.06415	1.78224
chr12:109592887-109592909_+	mmu-miR-127-3p	chr12:109592887-109592909_+	22	22	109592887	109592909	+	Yes	Yes	11	11	9	0	1.3917	1.27492	0.957733	0
chr1:128202368-128202388_+	mmu-miR-128-1-5p	chr1:128202368-128202389_+	21	20	128202368	128202388	+	Yes	No	3	4	1	24	0.379556	0.463607	0.106415	2.25125
chr1:128202368-128202389_+	mmu-miR-128-1-5p	chr1:128202368-128202389_+	21	21	128202368	128202389	+	Yes	Yes	32	26	17	29	4.04859	3.01345	1.80905	2.72026
chr1:128202368-128202390_+	mmu-miR-128-1-5p	chr1:128202368-128202389_+	21	22	128202368	128202390	+	Yes	No	16	4	12	3	2.0243	0.463607	1.27698	0.281406
chr1:128202368-128202391_+	mmu-miR-128-1-5p	chr1:128202368-128202389_+	21	23	128202368	128202391	+	Yes	No	71	46	44	45	8.98282	5.33148	4.68225	4.22109
chr9:112118641-112118664_-	mmu-miR-128-3p	chr9:112118643-112118664_-	21	23	112118664	112118641	-	Yes	No	16	8	27	39	2.0243	0.927214	2.8732	3.65828
chr9:112118642-112118664_-	mmu-miR-128-3p	chr9:112118643-112118664_-	21	22	112118664	112118642	-	Yes	No	40	66	36	44	5.06074	7.64952	3.83093	4.12729
chr9:112118643-112118664_-	mmu-miR-128-3p	chr9:112118643-112118664_-	21	21	112118664	112118643	-	Yes	Yes	381	313	381	279	48.2036	36.2773	40.544	26.1708
chr9:112118644-112118664_-	mmu-miR-128-3p	chr9:112118643-112118664_-	21	20	112118664	112118644	-	Yes	No	63	143	50	160	7.97067	16.574	5.32074	15.0083
chr9:112118645-112118664_-	mmu-miR-128-3p	chr9:112118643-112118664_-	21	19	112118664	112118645	-	Yes	No	11	76	14	70	1.3917	8.80854	1.48981	6.56615
chr9:112118646-112118664_-	mmu-miR-128-3p	chr9:112118643-112118664_-	21	18	112118664	112118646	-	Yes	No	0	7	4	16	0	0.811313	0.425659	1.50083
chr2:94241375-94241397_-	mmu-miR-129-2-3p	chr2:94241375-94241397_-	22	22	94241397	94241375	-	Yes	Yes	8	3	0	1	1.01215	0.347705	0	0.0938021
chr2:94241376-94241397_-	mmu-miR-129-2-3p	chr2:94241375-94241397_-	22	21	94241397	94241376	-	Yes	No	8	3	0	10	1.01215	0.347705	0	0.938021
chr2:94241377-94241397_-	mmu-miR-129-2-3p	chr2:94241375-94241397_-	22	20	94241397	94241377	-	Yes	No	12	0	6	0	1.51822	0	0.638489	0
chr6:29022623-29022642_+	mmu-miR-129-5p	chr6:29022623-29022644_+	21	19	29022623	29022642	+	Yes	No	0	12	0	13	0	1.39082	0	1.21943
chr6:29022623-29022643_+	mmu-miR-129-5p	chr6:29022623-29022644_+	21	20	29022623	29022643	+	Yes	No	0	25	0	38	0	2.89755	0	3.56448
chr6:29022623-29022644_+	mmu-miR-129-5p	chr6:29022623-29022644_+	21	21	29022623	29022644	+	Yes	Yes	13	89	10	196	1.64474	10.3153	1.06415	18.3852
chr6:29022623-29022645_+	mmu-miR-129-5p	chr6:29022623-29022644_+	21	22	29022623	29022645	+	Yes	No	5	21	3	30	0.632593	2.43394	0.319244	2.81406
chr16:18284245-18284268_-	mmu-miR-1306-3p	chr16:18284247-18284268_-	21	23	18284268	18284245	-	Yes	No	0	4	9	0	0	0.463607	0.957733	0
chr16:18284246-18284268_-	mmu-miR-1306-3p	chr16:18284247-18284268_-	21	22	18284268	18284246	-	Yes	No	18	23	14	18	2.27733	2.66574	1.48981	1.68844
chr16:18284246-18284269_-	mmu-miR-1306-3p	chr16:18284247-18284268_-	21	23	18284269	18284246	-	No	No	12	0	0	0	1.51822	0	0	0
chr16:18284247-18284268_-	mmu-miR-1306-3p	chr16:18284247-18284268_-	21	21	18284268	18284247	-	Yes	Yes	16	12	13	5	2.0243	1.39082	1.38339	0.46901
chr16:18284247-18284269_-	mmu-miR-1306-3p	chr16:18284247-18284268_-	21	22	18284269	18284247	-	No	Yes	0	11	12	0	0	1.27492	1.27698	0
chr16:18284248-18284269_-	mmu-miR-1306-3p	chr16:18284247-18284268_-	21	21	18284269	18284248	-	No	No	8	3	0	9	1.01215	0.347705	0	0.844219
chr16:18284249-18284271_-	mmu-miR-1306-3p	chr16:18284247-18284268_-	21	22	18284271	18284249	-	No	No	16	13	18	0	2.0243	1.50672	1.91547	0
chr16:18284286-18284308_-	mmu-miR-1306-5p	chr16:18284287-18284310_-	23	22	18284308	18284286	-	No	No	20	4	8	0	2.53037	0.463607	0.851318	0
chr16:18284287-18284308_-	mmu-miR-1306-5p	chr16:18284287-18284310_-	23	21	18284308	18284287	-	No	Yes	27	16	11	26	3.416	1.85443	1.17056	2.43885
chr16:18284288-18284308_-	mmu-miR-1306-5p	chr16:18284287-18284310_-	23	20	18284308	18284288	-	No	No	3	0	0	14	0.379556	0	0	1.31323
chr2:84741114-84741137_-	mmu-miR-130a-3p	chr2:84741115-84741137_-	22	23	84741137	84741114	-	Yes	No	5	2	13	13	0.632593	0.231804	1.38339	1.21943
chr2:84741115-84741137_-	mmu-miR-130a-3p	chr2:84741115-84741137_-	22	22	84741137	84741115	-	Yes	Yes	16	10	26	12	2.0243	1.15902	2.76678	1.12563
chr2:84741116-84741137_-	mmu-miR-130a-3p	chr2:84741115-84741137_-	22	21	84741137	84741116	-	Yes	No	5	9	11	6	0.632593	1.04312	1.17056	0.562813
chr2:84741117-84741137_-	mmu-miR-130a-3p	chr2:84741115-84741137_-	22	20	84741137	84741117	-	Yes	No	54	19	54	67	6.832	2.20213	5.7464	6.28474
chr16:17124067-17124092_-	mmu-miR-130b-3p	chr16:17124070-17124092_-	22	25	17124092	17124067	-	Yes	No	0	2	9	0	0	0.231804	0.957733	0
chr16:17124068-17124092_-	mmu-miR-130b-3p	chr16:17124070-17124092_-	22	24	17124092	17124068	-	Yes	No	3	9	21	21	0.379556	1.04312	2.23471	1.96984
chr16:17124069-17124091_-	mmu-miR-130b-3p	chr16:17124070-17124092_-	22	22	17124091	17124069	-	No	No	23	42	22	12	2.90993	4.86788	2.34112	1.12563
chr16:17124069-17124092_-	mmu-miR-130b-3p	chr16:17124070-17124092_-	22	23	17124092	17124069	-	Yes	No	749	602	764	519	94.7624	69.7729	81.3009	48.6833
chr16:17124070-17124091_-	mmu-miR-130b-3p	chr16:17124070-17124092_-	22	21	17124091	17124070	-	No	Yes	10	17	29	19	1.26519	1.97033	3.08603	1.78224
chr16:17124070-17124092_-	mmu-miR-130b-3p	chr16:17124070-17124092_-	22	22	17124092	17124070	-	Yes	Yes	318	270	284	317	40.2329	31.2935	30.2218	29.7353
chr16:17124071-17124091_-	mmu-miR-130b-3p	chr16:17124070-17124092_-	22	20	17124091	17124071	-	No	No	4	13	7	8	0.506074	1.50672	0.744903	0.750417
chr16:17124071-17124092_-	mmu-miR-130b-3p	chr16:17124070-17124092_-	22	21	17124092	17124071	-	Yes	No	124	147	115	142	15.6883	17.0376	12.2377	13.3199
chr16:17124072-17124091_-	mmu-miR-130b-3p	chr16:17124070-17124092_-	22	19	17124091	17124072	-	No	No	5	26	20	22	0.632593	3.01345	2.1283	2.06365
chr16:17124072-17124092_-	mmu-miR-130b-3p	chr16:17124070-17124092_-	22	20	17124092	17124072	-	Yes	No	809	782	900	792	102.353	90.6352	95.7733	74.2913
chr16:17124073-17124092_-	mmu-miR-130b-3p	chr16:17124070-17124092_-	22	19	17124092	17124073	-	Yes	No	8	23	14	22	1.01215	2.66574	1.48981	2.06365
chr16:17124106-17124130_-	mmu-miR-130b-5p	chr16:17124108-17124130_-	22	24	17124130	17124106	-	Yes	No	8	2	10	2	1.01215	0.231804	1.06415	0.187604
chr16:17124107-17124130_-	mmu-miR-130b-5p	chr16:17124108-17124130_-	22	23	17124130	17124107	-	Yes	No	22	31	52	17	2.78341	3.59296	5.53357	1.59464
chr16:17124108-17124130_-	mmu-miR-130b-5p	chr16:17124108-17124130_-	22	22	17124130	17124108	-	Yes	Yes	963	683	857	599	121.837	79.1609	91.1975	56.1874
chr16:17124108-17124131_-	mmu-miR-130b-5p	chr16:17124108-17124130_-	22	23	17124131	17124108	-	No	Yes	4	5	10	6	0.506074	0.579509	1.06415	0.562813
chr16:17124109-17124130_-	mmu-miR-130b-5p	chr16:17124108-17124130_-	22	21	17124130	17124109	-	Yes	No	138	72	147	58	17.4596	8.34493	15.643	5.44052
chr16:17124109-17124131_-	mmu-miR-130b-5p	chr16:17124108-17124130_-	22	22	17124131	17124109	-	No	No	30	0	27	8	3.79556	0	2.8732	0.750417
chr16:17124110-17124130_-	mmu-miR-130b-5p	chr16:17124108-17124130_-	22	20	17124130	17124110	-	Yes	No	15	55	16	52	1.89778	6.3746	1.70264	4.87771
chr16:17124110-17124131_-	mmu-miR-130b-5p	chr16:17124108-17124130_-	22	21	17124131	17124110	-	No	No	6	16	18	17	0.759111	1.85443	1.91547	1.59464
chr16:17124111-17124130_-	mmu-miR-130b-5p	chr16:17124108-17124130_-	22	19	17124130	17124111	-	Yes	No	7	22	29	27	0.88563	2.54984	3.08603	2.53266
chr16:17124111-17124131_-	mmu-miR-130b-5p	chr16:17124108-17124130_-	22	20	17124131	17124111	-	No	No	2	3	5	25	0.253037	0.347705	0.532074	2.34505
chr11:75173722-75173743_+	mmu-miR-132-3p	chr11:75173722-75173744_+	22	21	75173722	75173743	+	Yes	No	10	19	15	55	1.26519	2.20213	1.59622	5.15911
chr11:75173722-75173744_+	mmu-miR-132-3p	chr11:75173722-75173744_+	22	22	75173722	75173744	+	Yes	Yes	384	343	526	649	48.5831	39.7543	55.9742	60.8776
chr11:75173722-75173745_+	mmu-miR-132-3p	chr11:75173722-75173744_+	22	23	75173722	75173745	+	Yes	No	428	410	751	683	54.1499	47.5197	79.9175	64.0668
chr11:75173722-75173746_+	mmu-miR-132-3p	chr11:75173722-75173744_+	22	24	75173722	75173746	+	Yes	No	5	30	21	17	0.632593	3.47705	2.23471	1.59464
chr11:75173723-75173744_+	mmu-miR-132-3p	chr11:75173722-75173744_+	22	21	75173723	75173744	+	No	Yes	7	12	10	11	0.88563	1.39082	1.06415	1.03182
chr11:75173723-75173745_+	mmu-miR-132-3p	chr11:75173722-75173744_+	22	22	75173723	75173745	+	No	No	16	8	7	14	2.0243	0.927214	0.744903	1.31323
chr11:75173724-75173745_+	mmu-miR-132-3p	chr11:75173722-75173744_+	22	21	75173724	75173745	+	No	No	16	13	10	16	2.0243	1.50672	1.06415	1.50083
chr11:75173686-75173707_+	mmu-miR-132-5p	chr11:75173685-75173707_+	22	21	75173686	75173707	+	No	Yes	2	4	5	14	0.253037	0.463607	0.532074	1.31323
chr11:75173686-75173708_+	mmu-miR-132-5p	chr11:75173685-75173707_+	22	22	75173686	75173708	+	No	No	55	32	69	76	6.95852	3.70886	7.34262	7.12896
chr8:94324311-94324330_+	mmu-miR-138-5p	chr8:94324311-94324334_+	23	19	94324311	94324330	+	Yes	No	0	10	0	0	0	1.15902	0	0
chr7:101475401-101475420_+	mmu-miR-139-3p	chr7:101475417-101475439_+	22	19	101475401	101475420	+	No	No	0	0	10	8	0	0	1.06415	0.750417
chr7:101475417-101475439_+	mmu-miR-139-3p	chr7:101475417-101475439_+	22	22	101475417	101475439	+	Yes	Yes	4	14	26	15	0.506074	1.62263	2.76678	1.40703
chr7:101475417-101475440_+	mmu-miR-139-3p	chr7:101475417-101475439_+	22	23	101475417	101475440	+	Yes	No	41	74	122	76	5.18726	8.57673	12.9826	7.12896
chr7:101475418-101475440_+	mmu-miR-139-3p	chr7:101475417-101475439_+	22	22	101475418	101475440	+	No	No	0	12	0	0	0	1.39082	0	0
chr7:101475381-101475400_+	mmu-miR-139-5p	chr7:101475381-101475403_+	22	19	101475381	101475400	+	Yes	No	2	12	7	65	0.253037	1.39082	0.744903	6.09714
chr7:101475381-101475401_+	mmu-miR-139-5p	chr7:101475381-101475403_+	22	20	101475381	101475401	+	Yes	No	11	20	41	36	1.3917	2.31804	4.36301	3.37688
chr7:101475381-101475402_+	mmu-miR-139-5p	chr7:101475381-101475403_+	22	21	101475381	101475402	+	Yes	No	15	37	63	83	1.89778	4.28837	6.70413	7.78557
chr7:101475381-101475403_+	mmu-miR-139-5p	chr7:101475381-101475403_+	22	22	101475381	101475403	+	Yes	Yes	27	79	82	111	3.416	9.15624	8.72601	10.412
chr7:101475381-101475404_+	mmu-miR-139-5p	chr7:101475381-101475403_+	22	23	101475381	101475404	+	Yes	No	114	116	343	183	14.4231	13.4446	36.5003	17.1658
chr7:101475381-101475405_+	mmu-miR-139-5p	chr7:101475381-101475403_+	22	24	101475381	101475405	+	Yes	No	0	0	9	9	0	0	0.957733	0.844219
chr7:101475381-101475406_+	mmu-miR-139-5p	chr7:101475381-101475403_+	22	25	101475381	101475406	+	Yes	No	3	12	6	0	0.379556	1.39082	0.638489	0
chr8:107551268-107551289_+	mmu-miR-140-3p	chr8:107551287-107551308_+	21	21	107551268	107551289	+	No	No	0	0	12	0	0	0	1.27698	0
chr8:107551269-107551289_+	mmu-miR-140-3p	chr8:107551287-107551308_+	21	20	107551269	107551289	+	No	No	24	0	8	0	3.03644	0	0.851318	0
chr8:107551284-107551309_+	mmu-miR-140-3p	chr8:107551287-107551308_+	21	25	107551284	107551309	+	No	No	9	0	0	0	1.13867	0	0	0
chr8:107551284-107551310_+	mmu-miR-140-3p	chr8:107551287-107551308_+	21	26	107551284	107551310	+	No	No	0	0	0	12	0	0	0	1.12563
chr8:107551285-107551307_+	mmu-miR-140-3p	chr8:107551287-107551308_+	21	22	107551285	107551307	+	No	No	0	10	4	0	0	1.15902	0.425659	0
chr8:107551286-107551308_+	mmu-miR-140-3p	chr8:107551287-107551308_+	21	22	107551286	107551308	+	No	Yes	2	4	12	5	0.253037	0.463607	1.27698	0.46901
chr8:107551286-107551310_+	mmu-miR-140-3p	chr8:107551287-107551308_+	21	24	107551286	107551310	+	No	No	25	2	5	6	3.16296	0.231804	0.532074	0.562813
chr8:107551286-107551311_+	mmu-miR-140-3p	chr8:107551287-107551308_+	21	25	107551286	107551311	+	No	No	9	22	14	20	1.13867	2.54984	1.48981	1.87604
chr8:107551287-107551305_+	mmu-miR-140-3p	chr8:107551287-107551308_+	21	18	107551287	107551305	+	Yes	No	20	37	24	83	2.53037	4.28837	2.55395	7.78557
chr8:107551287-107551306_+	mmu-miR-140-3p	chr8:107551287-107551308_+	21	19	107551287	107551306	+	Yes	No	42	17	54	7	5.31378	1.97033	5.7464	0.656615
chr8:107551287-107551307_+	mmu-miR-140-3p	chr8:107551287-107551308_+	21	20	107551287	107551307	+	Yes	No	1668	2275	1946	3028	211.033	263.677	207.083	284.033
chr8:107551287-107551308_+	mmu-miR-140-3p	chr8:107551287-107551308_+	21	21	107551287	107551308	+	Yes	Yes	8768	8321	9906	9946	1109.31	964.419	1054.14	932.956
chr8:107551287-107551309_+	mmu-miR-140-3p	chr8:107551287-107551308_+	21	22	107551287	107551309	+	Yes	No	12626	12116	14540	14464	1597.42	1404.27	1547.27	1356.75
chr8:107551287-107551310_+	mmu-miR-140-3p	chr8:107551287-107551308_+	21	23	107551287	107551310	+	Yes	No	17230	12176	18218	12825	2179.91	1411.22	1938.66	1203.01
chr8:107551287-107551311_+	mmu-miR-140-3p	chr8:107551287-107551308_+	21	24	107551287	107551311	+	Yes	No	29897	32409	30960	29743	3782.52	3756.26	3294.6	2789.96
chr8:107551287-107551312_+	mmu-miR-140-3p	chr8:107551287-107551308_+	21	25	107551287	107551312	+	Yes	No	324	328	374	427	40.992	38.0158	39.7991	40.0535
chr8:107551287-107551313_+	mmu-miR-140-3p	chr8:107551287-107551308_+	21	26	107551287	107551313	+	Yes	No	71	49	73	80	8.98282	5.67919	7.76828	7.50417
chr8:107551288-107551306_+	mmu-miR-140-3p	chr8:107551287-107551308_+	21	18	107551288	107551306	+	No	No	3	2	17	2	0.379556	0.231804	1.80905	0.187604
chr8:107551288-107551307_+	mmu-miR-140-3p	chr8:107551287-107551308_+	21	19	107551288	107551307	+	No	No	345	543	334	570	43.6489	62.9347	35.5425	53.4672
chr8:107551288-107551308_+	mmu-miR-140-3p	chr8:107551287-107551308_+	21	20	107551288	107551308	+	No	Yes	1849	1454	1745	1778	233.933	168.521	185.694	166.78
chr8:107551288-107551309_+	mmu-miR-140-3p	chr8:107551287-107551308_+	21	21	107551288	107551309	+	No	No	6387	4621	6567	5433	808.074	535.582	698.826	509.627
chr8:107551288-107551310_+	mmu-miR-140-3p	chr8:107551287-107551308_+	21	22	107551288	107551310	+	No	No	20565	12148	17830	12199	2601.85	1407.98	1897.38	1144.29
chr8:107551288-107551311_+	mmu-miR-140-3p	chr8:107551287-107551308_+	21	23	107551288	107551311	+	No	No	48636	44038	47894	37960	6153.36	5104.08	5096.63	3560.73
chr8:107551288-107551312_+	mmu-miR-140-3p	chr8:107551287-107551308_+	21	24	107551288	107551312	+	No	No	855	834	878	735	108.173	96.6621	93.4322	68.9445
chr8:107551288-107551313_+	mmu-miR-140-3p	chr8:107551287-107551308_+	21	25	107551288	107551313	+	No	No	322	318	304	254	40.739	36.8568	32.3501	23.8257
chr8:107551288-107551314_+	mmu-miR-140-3p	chr8:107551287-107551308_+	21	26	107551288	107551314	+	No	No	37	44	33	21	4.68119	5.09968	3.51169	1.96984
chr8:107551289-107551307_+	mmu-miR-140-3p	chr8:107551287-107551308_+	21	18	107551289	107551307	+	No	No	12	12	10	33	1.51822	1.39082	1.06415	3.09547
chr8:107551289-107551308_+	mmu-miR-140-3p	chr8:107551287-107551308_+	21	19	107551289	107551308	+	No	Yes	51	34	86	89	6.45245	3.94066	9.15167	8.34839
chr8:107551289-107551309_+	mmu-miR-140-3p	chr8:107551287-107551308_+	21	20	107551289	107551309	+	No	No	264	148	238	210	33.4009	17.1535	25.3267	19.6984
chr8:107551289-107551310_+	mmu-miR-140-3p	chr8:107551287-107551308_+	21	21	107551289	107551310	+	No	No	985	635	760	674	124.621	73.5976	80.8752	63.2226
chr8:107551289-107551311_+	mmu-miR-140-3p	chr8:107551287-107551308_+	21	22	107551289	107551311	+	No	No	5167	4195	5197	4152	653.721	486.208	553.038	389.466
chr8:107551289-107551312_+	mmu-miR-140-3p	chr8:107551287-107551308_+	21	23	107551289	107551312	+	No	No	45	51	73	68	5.69333	5.91099	7.76828	6.37854
chr8:107551289-107551313_+	mmu-miR-140-3p	chr8:107551287-107551308_+	21	24	107551289	107551313	+	No	No	35	20	24	7	4.42815	2.31804	2.55395	0.656615
chr8:107551290-107551308_+	mmu-miR-140-3p	chr8:107551287-107551308_+	21	18	107551290	107551308	+	No	Yes	18	7	14	16	2.27733	0.811313	1.48981	1.50083
chr8:107551290-107551309_+	mmu-miR-140-3p	chr8:107551287-107551308_+	21	19	107551290	107551309	+	No	No	20	24	24	26	2.53037	2.78164	2.55395	2.43885
chr8:107551290-107551310_+	mmu-miR-140-3p	chr8:107551287-107551308_+	21	20	107551290	107551310	+	No	No	38	66	62	60	4.8077	7.64952	6.59772	5.62813
chr8:107551290-107551311_+	mmu-miR-140-3p	chr8:107551287-107551308_+	21	21	107551290	107551311	+	No	No	436	357	334	323	55.1621	41.3769	35.5425	30.2981
chr8:107551290-107551312_+	mmu-miR-140-3p	chr8:107551287-107551308_+	21	22	107551290	107551312	+	No	No	20	40	19	22	2.53037	4.63607	2.02188	2.06365
chr8:107551290-107551313_+	mmu-miR-140-3p	chr8:107551287-107551308_+	21	23	107551290	107551313	+	No	No	14	5	25	33	1.77126	0.579509	2.66037	3.09547
chr8:107551291-107551309_+	mmu-miR-140-3p	chr8:107551287-107551308_+	21	18	107551291	107551309	+	No	No	4	10	4	10	0.506074	1.15902	0.425659	0.938021
chr8:107551291-107551310_+	mmu-miR-140-3p	chr8:107551287-107551308_+	21	19	107551291	107551310	+	No	No	17	3	0	7	2.15082	0.347705	0	0.656615
chr8:107551291-107551311_+	mmu-miR-140-3p	chr8:107551287-107551308_+	21	20	107551291	107551311	+	No	No	36	32	39	36	4.55467	3.70886	4.15018	3.37688
chr8:107551248-107551268_+	mmu-miR-140-5p	chr8:107551248-107551270_+	22	20	107551248	107551268	+	Yes	No	11	12	6	30	1.3917	1.39082	0.638489	2.81406
chr8:107551248-107551269_+	mmu-miR-140-5p	chr8:107551248-107551270_+	22	21	107551248	107551269	+	Yes	No	26	18	31	8	3.28948	2.08623	3.29886	0.750417
chr8:107551248-107551270_+	mmu-miR-140-5p	chr8:107551248-107551270_+	22	22	107551248	107551270	+	Yes	Yes	919	750	1020	877	116.271	86.9264	108.543	82.2644
chr8:107551248-107551271_+	mmu-miR-140-5p	chr8:107551248-107551270_+	22	23	107551248	107551271	+	Yes	No	145	152	171	144	18.3452	17.6171	18.1969	13.5075
chr8:107551249-107551270_+	mmu-miR-140-5p	chr8:107551248-107551270_+	22	21	107551249	107551270	+	No	Yes	32	61	69	42	4.04859	7.07001	7.34262	3.93969
chr8:107551249-107551271_+	mmu-miR-140-5p	chr8:107551248-107551270_+	22	22	107551249	107551271	+	No	No	37	6	28	31	4.68119	0.695411	2.97961	2.90786
chr6:124717915-124717938_-	mmu-miR-141-3p	chr6:124717916-124717938_-	22	23	124717938	124717915	-	Yes	No	0	4	3	13	0	0.463607	0.319244	1.21943
chr6:124717916-124717938_-	mmu-miR-141-3p	chr6:124717916-124717938_-	22	22	124717938	124717916	-	Yes	Yes	14	9	13	12	1.77126	1.04312	1.38339	1.12563
chr6:124717917-124717937_-	mmu-miR-141-3p	chr6:124717916-124717938_-	22	20	124717937	124717917	-	No	No	8	5	1	0	1.01215	0.579509	0.106415	0
chr6:124717917-124717938_-	mmu-miR-141-3p	chr6:124717916-124717938_-	22	21	124717938	124717917	-	Yes	No	102	251	155	226	12.9049	29.0914	16.4943	21.1993
chr6:124717918-124717938_-	mmu-miR-141-3p	chr6:124717916-124717938_-	22	20	124717938	124717918	-	Yes	No	0	2	11	0	0	0.231804	1.17056	0
chr11:87756886-87756905_+	mmu-miR-142a-3p	chr11:87756902-87756925_+	23	19	87756886	87756905	+	No	No	12	6	20	0	1.51822	0.695411	2.1283	0
chr11:87756902-87756921_+	mmu-miR-142a-3p	chr11:87756902-87756925_+	23	19	87756902	87756921	+	Yes	No	20	10	8	30	2.53037	1.15902	0.851318	2.81406
chr11:87756902-87756923_+	mmu-miR-142a-3p	chr11:87756902-87756925_+	23	21	87756902	87756923	+	Yes	No	11	39	71	93	1.3917	4.52017	7.55545	8.72359
chr11:87756902-87756924_+	mmu-miR-142a-3p	chr11:87756902-87756925_+	23	22	87756902	87756924	+	Yes	No	1524	1222	1770	1434	192.814	141.632	188.354	134.512
chr11:87756902-87756925_+	mmu-miR-142a-3p	chr11:87756902-87756925_+	23	23	87756902	87756925	+	Yes	Yes	1345	1397	1529	1554	170.167	161.915	162.708	145.768
chr11:87756902-87756926_+	mmu-miR-142a-3p	chr11:87756902-87756925_+	23	24	87756902	87756926	+	Yes	No	222	288	216	290	28.0871	33.3797	22.9856	27.2026
chr11:87756902-87756927_+	mmu-miR-142a-3p	chr11:87756902-87756925_+	23	25	87756902	87756927	+	Yes	No	71	155	67	106	8.98282	17.9648	7.12979	9.94302
chr11:87756903-87756924_+	mmu-miR-142a-3p	chr11:87756902-87756925_+	23	21	87756903	87756924	+	No	No	189	98	197	148	23.912	11.3584	20.9637	13.8827
chr11:87756903-87756925_+	mmu-miR-142a-3p	chr11:87756902-87756925_+	23	22	87756903	87756925	+	No	Yes	245	268	391	282	30.997	31.0617	41.6082	26.4522
chr11:87756903-87756926_+	mmu-miR-142a-3p	chr11:87756902-87756925_+	23	23	87756903	87756926	+	No	No	88	116	91	110	11.1336	13.4446	9.68374	10.3182
chr11:87756903-87756927_+	mmu-miR-142a-3p	chr11:87756902-87756925_+	23	24	87756903	87756927	+	No	No	40	65	25	56	5.06074	7.53362	2.66037	5.25292
chr11:87756904-87756924_+	mmu-miR-142a-3p	chr11:87756902-87756925_+	23	20	87756904	87756924	+	No	No	26	13	38	33	3.28948	1.50672	4.04376	3.09547
chr11:87756904-87756925_+	mmu-miR-142a-3p	chr11:87756902-87756925_+	23	21	87756904	87756925	+	No	Yes	49	67	111	78	6.19941	7.76542	11.812	7.31656
chr11:87756904-87756926_+	mmu-miR-142a-3p	chr11:87756902-87756925_+	23	22	87756904	87756926	+	No	No	180	142	198	231	22.7733	16.4581	21.0701	21.6683
chr11:87756904-87756927_+	mmu-miR-142a-3p	chr11:87756902-87756925_+	23	23	87756904	87756927	+	No	No	47	68	77	59	5.94637	7.88132	8.19394	5.53432
chr11:87756905-87756926_+	mmu-miR-142a-3p	chr11:87756902-87756925_+	23	21	87756905	87756926	+	No	No	42	34	24	43	5.31378	3.94066	2.55395	4.03349
chr11:87756905-87756927_+	mmu-miR-142a-3p	chr11:87756902-87756925_+	23	22	87756905	87756927	+	No	No	1828	2015	2291	2221	231.276	233.542	243.796	208.334
chr11:87756905-87756928_+	mmu-miR-142a-3p	chr11:87756902-87756925_+	23	23	87756905	87756928	+	No	No	15	20	13	7	1.89778	2.31804	1.38339	0.656615
chr11:87756905-87756929_+	mmu-miR-142a-3p	chr11:87756902-87756925_+	23	24	87756905	87756929	+	No	No	9	0	0	0	1.13867	0	0	0
chr11:87756915-87756936_+	mmu-miR-142a-3p	chr11:87756902-87756925_+	23	21	87756915	87756936	+	No	No	6	8	2	21	0.759111	0.927214	0.21283	1.96984
chr11:87756915-87756937_+	mmu-miR-142a-3p	chr11:87756902-87756925_+	23	22	87756915	87756937	+	No	No	8	3	10	12	1.01215	0.347705	1.06415	1.12563
chr11:87756917-87756939_+	mmu-miR-142a-3p	chr11:87756902-87756925_+	23	22	87756917	87756939	+	No	No	18	4	10	20	2.27733	0.463607	1.06415	1.87604
chr11:87756924-87756945_+	mmu-miR-142a-3p	chr11:87756902-87756925_+	23	21	87756924	87756945	+	No	No	13	26	7	21	1.64474	3.01345	0.744903	1.96984
chr11:87756863-87756883_+	mmu-miR-142a-5p	chr11:87756866-87756887_+	21	20	87756863	87756883	+	No	No	31	63	49	69	3.92207	7.30181	5.21432	6.47234
chr11:87756863-87756884_+	mmu-miR-142a-5p	chr11:87756866-87756887_+	21	21	87756863	87756884	+	No	No	328	486	525	527	41.4981	56.3283	55.8678	49.4337
chr11:87756863-87756885_+	mmu-miR-142a-5p	chr11:87756866-87756887_+	21	22	87756863	87756885	+	No	No	1833	1710	1722	1859	231.908	198.192	183.246	174.378
chr11:87756863-87756886_+	mmu-miR-142a-5p	chr11:87756866-87756887_+	21	23	87756863	87756886	+	No	No	162	160	154	116	20.496	18.5443	16.3879	10.881
chr11:87756863-87756887_+	mmu-miR-142a-5p	chr11:87756866-87756887_+	21	24	87756863	87756887	+	No	Yes	3	17	9	19	0.379556	1.97033	0.957733	1.78224
chr11:87756864-87756882_+	mmu-miR-142a-5p	chr11:87756866-87756887_+	21	18	87756864	87756882	+	No	No	4	94	8	118	0.506074	10.8948	0.851318	11.0686
chr11:87756864-87756883_+	mmu-miR-142a-5p	chr11:87756866-87756887_+	21	19	87756864	87756883	+	No	No	701	2100	929	2400	88.6895	243.394	98.8593	225.125
chr11:87756864-87756884_+	mmu-miR-142a-5p	chr11:87756866-87756887_+	21	20	87756864	87756884	+	No	No	30957	43963	36787	54608	3916.63	5095.39	3914.68	5122.34
chr11:87756864-87756885_+	mmu-miR-142a-5p	chr11:87756866-87756887_+	21	21	87756864	87756885	+	No	No	5462	13690	7309	15576	691.044	1586.7	777.786	1461.06
chr11:87756864-87756886_+	mmu-miR-142a-5p	chr11:87756866-87756887_+	21	22	87756864	87756886	+	No	No	31588	21157	37145	26484	3996.47	2452.13	3952.78	2484.25
chr11:87756864-87756887_+	mmu-miR-142a-5p	chr11:87756866-87756887_+	21	23	87756864	87756887	+	No	Yes	2102	2057	2693	2484	265.942	238.41	286.575	233.004
chr11:87756864-87756888_+	mmu-miR-142a-5p	chr11:87756866-87756887_+	21	24	87756864	87756888	+	No	No	12	47	20	25	1.51822	5.44738	2.1283	2.34505
chr11:87756865-87756883_+	mmu-miR-142a-5p	chr11:87756866-87756887_+	21	18	87756865	87756883	+	No	No	11	39	23	49	1.3917	4.52017	2.44754	4.5963
chr11:87756865-87756884_+	mmu-miR-142a-5p	chr11:87756866-87756887_+	21	19	87756865	87756884	+	No	No	850	1156	977	1623	107.541	133.982	103.967	152.241
chr11:87756865-87756885_+	mmu-miR-142a-5p	chr11:87756866-87756887_+	21	20	87756865	87756885	+	No	No	216	445	211	493	27.328	51.5763	22.4535	46.2444
chr11:87756865-87756886_+	mmu-miR-142a-5p	chr11:87756866-87756887_+	21	21	87756865	87756886	+	No	No	825	628	854	780	104.378	72.7863	90.8782	73.1656
chr11:87756865-87756887_+	mmu-miR-142a-5p	chr11:87756866-87756887_+	21	22	87756865	87756887	+	No	Yes	54	70	58	91	6.832	8.11313	6.17206	8.53599
chr11:87756866-87756884_+	mmu-miR-142a-5p	chr11:87756866-87756887_+	21	18	87756866	87756884	+	Yes	No	618	1507	757	2205	78.1885	174.664	80.556	206.834
chr11:87756866-87756885_+	mmu-miR-142a-5p	chr11:87756866-87756887_+	21	19	87756866	87756885	+	Yes	No	677	3478	949	4130	85.6531	403.106	100.988	387.403
chr11:87756866-87756886_+	mmu-miR-142a-5p	chr11:87756866-87756887_+	21	20	87756866	87756886	+	Yes	No	7099	5620	7435	7449	898.155	651.368	791.194	698.732
chr11:87756866-87756887_+	mmu-miR-142a-5p	chr11:87756866-87756887_+	21	21	87756866	87756887	+	Yes	Yes	66729	68166	71264	84692	8442.46	7900.56	7583.54	7944.29
chr11:87756866-87756888_+	mmu-miR-142a-5p	chr11:87756866-87756887_+	21	22	87756866	87756888	+	Yes	No	2939	2517	3159	2794	371.838	291.725	336.164	262.083
chr11:87756866-87756889_+	mmu-miR-142a-5p	chr11:87756866-87756887_+	21	23	87756866	87756889	+	Yes	No	291	198	220	229	36.8169	22.9486	23.4112	21.4807
chr11:87756866-87756890_+	mmu-miR-142a-5p	chr11:87756866-87756887_+	21	24	87756866	87756890	+	Yes	No	15	9	19	27	1.89778	1.04312	2.02188	2.53266
chr11:87756867-87756885_+	mmu-miR-142a-5p	chr11:87756866-87756887_+	21	18	87756867	87756885	+	No	No	50	214	94	251	6.32593	24.803	10.003	23.5443
chr11:87756867-87756886_+	mmu-miR-142a-5p	chr11:87756866-87756887_+	21	19	87756867	87756886	+	No	No	297	171	326	270	37.576	19.8192	34.6912	25.3266
chr11:87756867-87756887_+	mmu-miR-142a-5p	chr11:87756866-87756887_+	21	20	87756867	87756887	+	No	Yes	4265	4335	4210	6832	539.602	502.434	448.006	640.856
chr11:87756867-87756888_+	mmu-miR-142a-5p	chr11:87756866-87756887_+	21	21	87756867	87756888	+	No	No	103	70	90	124	13.0314	8.11313	9.57733	11.6315
chr11:87756867-87756889_+	mmu-miR-142a-5p	chr11:87756866-87756887_+	21	22	87756867	87756889	+	No	No	36	23	25	24	4.55467	2.66574	2.66037	2.25125
chr11:87756868-87756886_+	mmu-miR-142a-5p	chr11:87756866-87756887_+	21	18	87756868	87756886	+	No	No	18	6	19	9	2.27733	0.695411	2.02188	0.844219
chr11:87756868-87756887_+	mmu-miR-142a-5p	chr11:87756866-87756887_+	21	19	87756868	87756887	+	No	Yes	41	48	48	71	5.18726	5.56329	5.10791	6.65995
chr18:61649196-61649219_-	mmu-miR-143-3p	chr18:61649198-61649219_-	21	23	61649219	61649196	-	Yes	No	21	13	0	0	2.65689	1.50672	0	0
chr18:61649197-61649218_-	mmu-miR-143-3p	chr18:61649198-61649219_-	21	21	61649218	61649197	-	No	No	12	5	0	0	1.51822	0.579509	0	0
chr18:61649197-61649219_-	mmu-miR-143-3p	chr18:61649198-61649219_-	21	22	61649219	61649197	-	Yes	No	258	393	5	3	32.6418	45.5494	0.532074	0.281406
chr18:61649198-61649219_-	mmu-miR-143-3p	chr18:61649198-61649219_-	21	21	61649219	61649198	-	Yes	Yes	251	474	22	22	31.7562	54.9375	2.34112	2.06365
chr18:61649199-61649219_-	mmu-miR-143-3p	chr18:61649198-61649219_-	21	20	61649219	61649199	-	Yes	No	293	865	15	42	37.0699	100.255	1.59622	3.93969
chr18:61649200-61649219_-	mmu-miR-143-3p	chr18:61649198-61649219_-	21	19	61649219	61649200	-	Yes	No	0	17	0	0	0	1.97033	0	0
chr11:78073046-78073065_+	mmu-miR-144-3p	chr11:78073046-78073066_+	20	19	78073046	78073065	+	Yes	No	8	0	0	0	1.01215	0	0	0
chr11:78073046-78073066_+	mmu-miR-144-3p	chr11:78073046-78073066_+	20	20	78073046	78073066	+	Yes	Yes	8	2	3	0	1.01215	0.231804	0.319244	0
chr11:43374398-43374420_-	mmu-miR-146a-3p	chr11:43374398-43374420_-	22	22	43374420	43374398	-	Yes	Yes	6	2	17	9	0.759111	0.231804	1.80905	0.844219
chr11:43374399-43374420_-	mmu-miR-146a-3p	chr11:43374398-43374420_-	22	21	43374420	43374399	-	Yes	No	0	8	13	6	0	0.927214	1.38339	0.562813
chr11:43374399-43374421_-	mmu-miR-146a-3p	chr11:43374398-43374420_-	22	22	43374421	43374399	-	No	No	27	17	9	16	3.416	1.97033	0.957733	1.50083
chr11:43374413-43374436_-	mmu-miR-146a-3p	chr11:43374398-43374420_-	22	23	43374436	43374413	-	No	No	0	0	12	0	0	0	1.27698	0
chr11:43374418-43374436_-	mmu-miR-146a-3p	chr11:43374398-43374420_-	22	18	43374436	43374418	-	No	No	28	4	22	14	3.54252	0.463607	2.34112	1.31323
chr11:43374430-43374456_-	mmu-miR-146a-5p	chr11:43374434-43374456_-	22	26	43374456	43374430	-	Yes	No	39	72	88	161	4.93422	8.34493	9.3645	15.1021
chr11:43374431-43374455_-	mmu-miR-146a-5p	chr11:43374434-43374456_-	22	24	43374455	43374431	-	No	No	18	42	32	54	2.27733	4.86788	3.40527	5.06531
chr11:43374431-43374456_-	mmu-miR-146a-5p	chr11:43374434-43374456_-	22	25	43374456	43374431	-	Yes	No	517	956	921	1692	65.4101	110.802	98.008	158.713
chr11:43374431-43374457_-	mmu-miR-146a-5p	chr11:43374434-43374456_-	22	26	43374457	43374431	-	No	No	16	45	40	92	2.0243	5.21558	4.25659	8.62979
chr11:43374432-43374455_-	mmu-miR-146a-5p	chr11:43374434-43374456_-	22	23	43374455	43374432	-	No	No	170	271	237	414	21.5082	31.4094	25.2203	38.8341
chr11:43374432-43374456_-	mmu-miR-146a-5p	chr11:43374434-43374456_-	22	24	43374456	43374432	-	Yes	No	6335	10493	11543	16538	801.495	1216.16	1228.35	1551.3
chr11:43374432-43374457_-	mmu-miR-146a-5p	chr11:43374434-43374456_-	22	25	43374457	43374432	-	No	No	283	382	466	708	35.8047	44.2745	49.5893	66.4119
chr11:43374433-43374455_-	mmu-miR-146a-5p	chr11:43374434-43374456_-	22	22	43374455	43374433	-	No	No	322	682	527	873	40.739	79.045	56.0806	81.8892
chr11:43374433-43374456_-	mmu-miR-146a-5p	chr11:43374434-43374456_-	22	23	43374456	43374433	-	Yes	No	16414	31333	27430	40319	2076.68	3631.55	2918.96	3782.01
chr11:43374433-43374457_-	mmu-miR-146a-5p	chr11:43374434-43374456_-	22	24	43374457	43374433	-	No	No	1060	1485	1723	2445	134.11	172.114	183.353	229.346
chr11:43374433-43374458_-	mmu-miR-146a-5p	chr11:43374434-43374456_-	22	25	43374458	43374433	-	No	No	11	5	5	5	1.3917	0.579509	0.532074	0.46901
chr11:43374434-43374455_-	mmu-miR-146a-5p	chr11:43374434-43374456_-	22	21	43374455	43374434	-	No	Yes	1296	1730	1463	1991	163.968	200.51	155.685	186.76
chr11:43374434-43374456_-	mmu-miR-146a-5p	chr11:43374434-43374456_-	22	22	43374456	43374434	-	Yes	Yes	59285	82830	78715	92548	7500.65	9600.15	8376.44	8681.2
chr11:43374434-43374457_-	mmu-miR-146a-5p	chr11:43374434-43374456_-	22	23	43374457	43374434	-	No	Yes	3036	3934	3745	5353	384.11	455.958	398.523	502.123
chr11:43374434-43374458_-	mmu-miR-146a-5p	chr11:43374434-43374456_-	22	24	43374458	43374434	-	No	Yes	0	12	12	18	0	1.39082	1.27698	1.68844
chr11:43374434-43374459_-	mmu-miR-146a-5p	chr11:43374434-43374456_-	22	25	43374459	43374434	-	No	Yes	9	13	8	7	1.13867	1.50672	0.851318	0.656615
chr11:43374435-43374455_-	mmu-miR-146a-5p	chr11:43374434-43374456_-	22	20	43374455	43374435	-	No	No	60	94	118	179	7.59111	10.8948	12.5569	16.7906
chr11:43374435-43374456_-	mmu-miR-146a-5p	chr11:43374434-43374456_-	22	21	43374456	43374435	-	Yes	No	3016	4894	6100	7813	381.58	567.223	649.13	732.876
chr11:43374435-43374457_-	mmu-miR-146a-5p	chr11:43374434-43374456_-	22	22	43374457	43374435	-	No	No	565	885	967	1382	71.483	102.573	102.903	129.634
chr11:43374435-43374458_-	mmu-miR-146a-5p	chr11:43374434-43374456_-	22	23	43374458	43374435	-	No	No	33	19	47	28	4.17511	2.20213	5.00149	2.62646
chr11:43374436-43374456_-	mmu-miR-146a-5p	chr11:43374434-43374456_-	22	20	43374456	43374436	-	Yes	No	128	93	189	176	16.1944	10.7789	20.1124	16.5092
chr11:43374436-43374457_-	mmu-miR-146a-5p	chr11:43374434-43374456_-	22	21	43374457	43374436	-	No	No	28	50	81	82	3.54252	5.79509	8.6196	7.69177
chr11:43374436-43374458_-	mmu-miR-146a-5p	chr11:43374434-43374456_-	22	22	43374458	43374436	-	No	No	4	13	19	6	0.506074	1.50672	2.02188	0.562813
chr11:43374437-43374456_-	mmu-miR-146a-5p	chr11:43374434-43374456_-	22	19	43374456	43374437	-	Yes	No	113	164	207	349	14.2966	19.0079	22.0279	32.7369
chr11:43374437-43374457_-	mmu-miR-146a-5p	chr11:43374434-43374456_-	22	20	43374457	43374437	-	No	No	8	7	2	9	1.01215	0.811313	0.21283	0.844219
chr19:46342827-46342848_+	mmu-miR-146b-3p	chr19:46342827-46342849_+	22	21	46342827	46342848	+	Yes	No	2	4	5	16	0.253037	0.463607	0.532074	1.50083
chr19:46342827-46342849_+	mmu-miR-146b-3p	chr19:46342827-46342849_+	22	22	46342827	46342849	+	Yes	Yes	7	15	14	23	0.88563	1.73853	1.48981	2.15745
chr19:46342786-46342813_+	mmu-miR-146b-5p	chr19:46342789-46342811_+	22	27	46342786	46342813	+	No	No	2	10	9	13	0.253037	1.15902	0.957733	1.21943
chr19:46342788-46342812_+	mmu-miR-146b-5p	chr19:46342789-46342811_+	22	24	46342788	46342812	+	No	No	13	27	21	54	1.64474	3.12935	2.23471	5.06531
chr19:46342788-46342813_+	mmu-miR-146b-5p	chr19:46342789-46342811_+	22	25	46342788	46342813	+	No	No	46	66	107	136	5.81985	7.64952	11.3864	12.7571
chr19:46342789-46342809_+	mmu-miR-146b-5p	chr19:46342789-46342811_+	22	20	46342789	46342809	+	Yes	No	107	114	153	219	13.5375	13.2128	16.2815	20.5427
chr19:46342789-46342810_+	mmu-miR-146b-5p	chr19:46342789-46342811_+	22	21	46342789	46342810	+	Yes	No	256	210	280	566	32.3887	24.3394	29.7961	53.092
chr19:46342789-46342811_+	mmu-miR-146b-5p	chr19:46342789-46342811_+	22	22	46342789	46342811	+	Yes	Yes	708	938	1268	2187	89.5751	108.716	134.934	205.145
chr19:46342789-46342812_+	mmu-miR-146b-5p	chr19:46342789-46342811_+	22	23	46342789	46342812	+	Yes	No	4155	8354	8433	18905	525.685	968.244	897.396	1773.33
chr19:46342789-46342813_+	mmu-miR-146b-5p	chr19:46342789-46342811_+	22	24	46342789	46342813	+	Yes	No	17869	24594	33641	56246	2260.76	2850.49	3579.9	5275.99
chr19:46342789-46342814_+	mmu-miR-146b-5p	chr19:46342789-46342811_+	22	25	46342789	46342814	+	Yes	No	222	616	423	1278	28.0871	71.3955	45.0134	119.879
chr19:46342789-46342815_+	mmu-miR-146b-5p	chr19:46342789-46342811_+	22	26	46342789	46342815	+	Yes	No	281	597	453	1382	35.5517	69.1934	48.2059	129.634
chr19:46342789-46342816_+	mmu-miR-146b-5p	chr19:46342789-46342811_+	22	27	46342789	46342816	+	Yes	No	7	11	7	35	0.88563	1.27492	0.744903	3.28307
chr19:46342790-46342810_+	mmu-miR-146b-5p	chr19:46342789-46342811_+	22	20	46342790	46342810	+	No	No	8	8	10	11	1.01215	0.927214	1.06415	1.03182
chr19:46342790-46342811_+	mmu-miR-146b-5p	chr19:46342789-46342811_+	22	21	46342790	46342811	+	No	Yes	8	10	19	41	1.01215	1.15902	2.02188	3.84589
chr19:46342790-46342812_+	mmu-miR-146b-5p	chr19:46342789-46342811_+	22	22	46342790	46342812	+	No	No	73	160	155	320	9.23585	18.5443	16.4943	30.0167
chr19:46342790-46342813_+	mmu-miR-146b-5p	chr19:46342789-46342811_+	22	23	46342790	46342813	+	No	No	328	415	594	1002	41.4981	48.0992	63.2104	93.9897
chr19:46342790-46342814_+	mmu-miR-146b-5p	chr19:46342789-46342811_+	22	24	46342790	46342814	+	No	No	5	11	5	30	0.632593	1.27492	0.532074	2.81406
chr19:46342790-46342815_+	mmu-miR-146b-5p	chr19:46342789-46342811_+	22	25	46342790	46342815	+	No	No	6	20	7	29	0.759111	2.31804	0.744903	2.72026
[truncated: 2,873 more rows]

## Sheet: Human macrophages - Table S3
Row.names	mir_name	mature_iv	mature_length	length	isomir_start	isomir_end	isomir_strand	canon_start	canon_end	EU28_N_raw	EU34_N_raw	EU52_N_raw	EU66_N_raw	EU302_N_raw	EU306_N_raw	EU28_S_raw	EU34_S_raw	EU52_S_raw	EU66_S_raw	EU302_S_raw	EU306_S_raw	EU28_N_norm	EU34_N_norm	EU52_N_norm	EU66_N_norm	EU302_N_norm	EU306_N_norm	EU28_S_norm	EU34_S_norm	EU52_S_norm	EU66_S_norm	EU302_S_norm	EU306_S_norm		average NT	average STM
[truncated: 2,710 more rows]

[truncated: 1 more sheets: Fold Change - Table S4]
